# Supplementary material for: CRISPR/Cas9-mediated heterozygous knockout of the autism gene CHD8 and characterization of its transcriptional networks in neurodevelopment
Source: PubMed Central journal article supplement (PMC4612430; doi:10.1186/s13229-015-0048-6), 2015-10-19
Supplement: 13229_2015_48_MOESM2_ESM.pdf [file 13229_2015_48_MOESM2_ESM.pdf]

Figure S1: GO term enrichment analysis (DAVID) for genes that were differentially expressed genes between NPCs and neurons in WT but not in *CHD8*<sup>+/-</sup> samples. (A) Genes expressed at higher levels in WT neurons than NPCs. (B) Genes expressed at lower levels in WT neurons than NPCs. P-value were corrected by Benjamini-Hotchberg method.

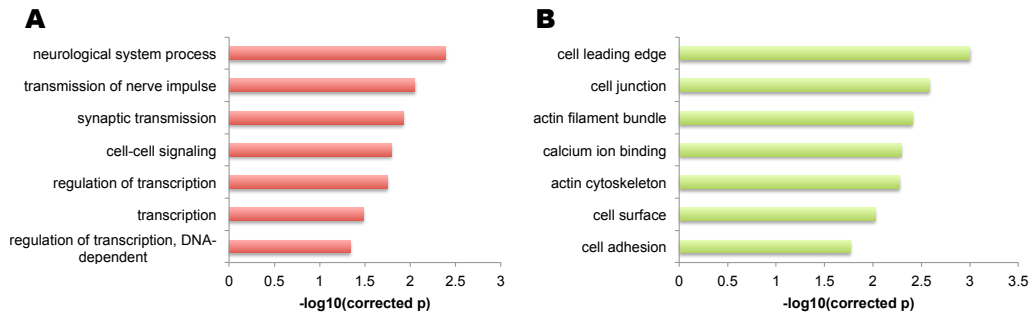

Figure S2: Expression of *CHD8* and brain volume associated DEGs in Brainspan. Expression values  $\log_2(\text{FPKM}+1)$  were scaled by row in heatmap. The numbers in parentheses below gene names represent Pearson's correlation coefficients (R) and p-values between *CHD8* and the corresponding gene. The order of genes was based on the correlation coefficients.

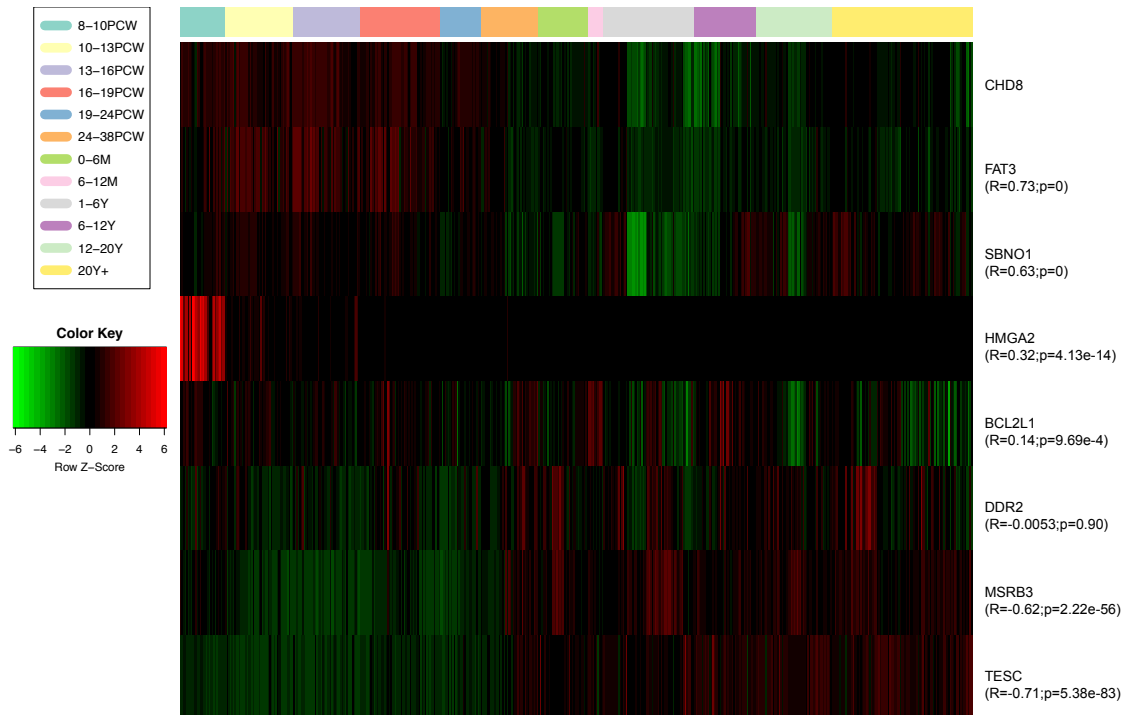

Figure S3: Comparison of the DEGs from current *CHD8*<sup>+/-</sup> analysis and previous *CHD8* knockdown studies. Genes were from NPC *CHD8*<sup>+/-</sup> (current data), NPC knockdown [1], NSC knockdown by two independent shRNAs (shC and shG) [2], SK-N-SH knockdown [3]. Also included DEGs from a previous transcriptomics profiling of organoids derived from ASD cases [4], with genes list from the TD11 and TD31 samples being combined. The red shading in each cell corresponds to the  $-\log_{10}P$  value for overrepresentation (Fisher's exact test, one-tailed), as shown in the color scale on the right (shown only if  $p < 0.05$ ). The first and the second number in each cell are the number of overlapping genes and the odd ratio of overlap to non-overlap, respectively. Numbers in the diagonal (grey cells) are the numbers of DEGs from previously studies that were also expressed in our samples.

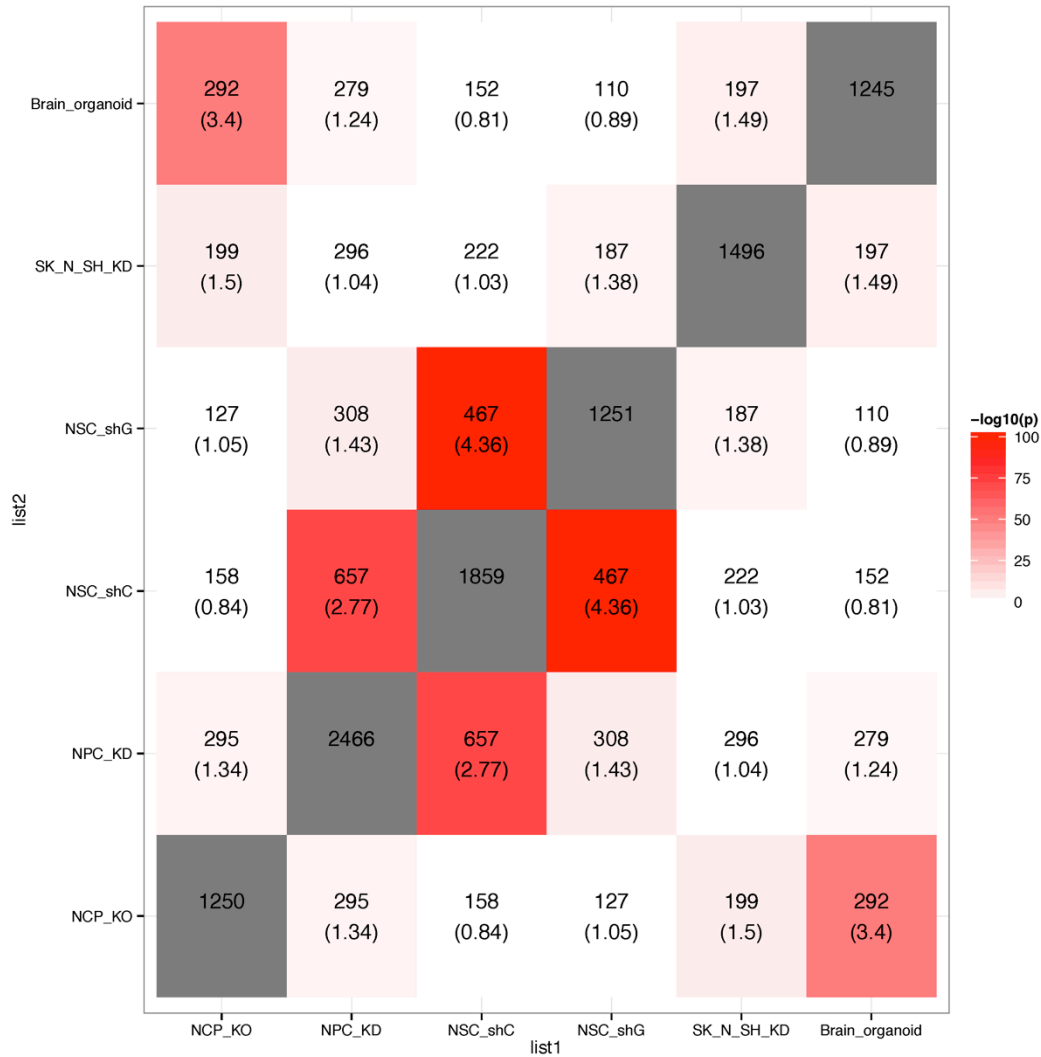

Table S1: Summary of RNA-seq quality.

| Sample Name     | Number of Pairs | Number of Mapped Pairs | exonic rate | intronic rate | intergenic rate | Median FPKM (genes) | Mean FPKM (genes) | Num of Genes (FPKM > 1) |
|-----------------|-----------------|------------------------|-------------|---------------|-----------------|---------------------|-------------------|-------------------------|
| control1_NPC    | 27,240,051      | 23,463,095             | 0.6088      | 0.34          | 0.0512          | 1.4672              | 67.8968           | 12,878                  |
| control2_NPC    | 24,248,402      | 21,275,566             | 0.7087      | 0.2567        | 0.0346          | 1.6287              | 110.7046          | 13,096                  |
| KO1_NPC         | 29,955,073      | 26,832,796             | 0.6494      | 0.3091        | 0.0415          | 1.8454              | 83.6047           | 13,294                  |
| KO2_NPC         | 24,531,882      | 21,941,336             | 0.6512      | 0.3092        | 0.0396          | 1.7143              | 95.6639           | 13,136                  |
| control1_neuron | 30,352,377      | 26,864,628             | 0.6307      | 0.3197        | 0.0496          | 1.6354              | 101.8777          | 13,158                  |
| control2_neuron | 26,833,384      | 23,538,348             | 0.7356      | 0.221         | 0.0434          | 2.1256              | 107.5034          | 13,589                  |
| KO1_neuron      | 32,077,864      | 28,112,380             | 0.6372      | 0.3216        | 0.0412          | 2.6096              | 123.6631          | 14,062                  |
| KO2_neuron      | 28,613,352      | 24,164,270             | 0.7064      | 0.256         | 0.0376          | 2.5386              | 113.1035          | 14,030                  |

## References

1. Sugathan A, Biagioli M, Golzio C, Erdin S, Blumenthal I, Manavalan P, Ragavendran A, Brand H, Lucente D, Miles J, et al: **CHD8 regulates neurodevelopmental pathways associated with autism spectrum disorder in neural progenitors.** *Proc Natl Acad Sci U S A* 2014, **111**:E4468-4477.
2. Cotney J, Muhle RA, Sanders SJ, Liu L, Willsey AJ, Niu W, Liu W, Klei L, Lei J, Yin J, et al: **The autism-associated chromatin modifier CHD8 regulates other autism risk genes during human neurodevelopment.** *Nat Commun* 2015, **6**:6404.
3. Wilkinson B, Grepo N, Thompson BL, Kim J, Wang K, Evgrafov OV, Lu W, Knowles JA, Campbell DB: **The autism-associated gene chromodomain helicase DNA-binding protein 8 (CHD8) regulates noncoding RNAs and autism-related genes.** *Transl Psychiatry* 2015, **5**:e568.
4. Mariani J, Coppola G, Zhang P, Abyzov A, Provini L, Tomasini L, Amenduni M, Szekely A, Palejev D, Wilson M, et al: **FOXG1-Dependent Dysregulation of GABA/Glutamate Neuron Differentiation in Autism Spectrum Disorders.** *Cell* 2015, **162**:375-390.
