# Supplementary material for: CRISPR/Cas9-mediated heterozygous knockout of the autism gene CHD8 and characterization of its transcriptional networks in neurodevelopment
Source: Mol Autism. 2015 Oct 19;6:55. doi: 10.1186/s13229-015-0048-6 (PMC4612430; doi:10.1186/s13229-015-0048-6)
Supplement: Additional file 9: — Table S8. GO analysis (ClueGO) of DEGs in each of five DEG lists from CHD8 +/− or knockdown analysis. (XLSX 670 kb) [file 13229_2015_48_MOESM9_ESM.xlsx]

## Sheet: NSC_KD_shC
GOID	GOTerm	Nr. Genes	% Associated Genes	Term PValue	Associated Genes Found
GO:0000070	mitotic sister chromatid segregation	12	20.6897	0.013739	[CHAMP1, CIT, DDX11, ESPL1, INO80, KATNB1, NCAPH, PLK1, POGZ, PSRC1, RAB33B, RB1]
GO:0000226	microtubule cytoskeleton organization	57	16.7155	1.5665262271075017E-4	[AURKB, AXIN1, BBS2, BLOC1S2, BORA, CAMSAP2, CCNF, CCSER2, CENPA, CEP68, CETN3, CHAMP1, CHEK2, CROCC, CYLD, DIXDC1, DVL1, DYNC1LI2, ESPL1, FBXW5, FMN2, GAS2L1, GAS2L3, GPSM2, HAUS2, HDAC6, INO80, KATNB1, KIF18B, KIF20A, KIF23, KIZ, MAP9, MID1IP1, MYBL2, NCOR1, NEK7, NUBP1, NUBP2, OFD1, PKD1, PLK1, PSRC1, RB1, RCC1, SAC3D1, SENP6, SKA1, SPEF2, SPIRE2, SUN2, TBCD, TMEM67, TUBG1, UBE2C, UXT, XRCC3]
GO:0000278	mitotic cell cycle	126	13.5922	6.104477404748935E-4	[ACVR1, ANAPC15, AURKAIP1, AURKB, BID, BORA, CCNE1, CCNF, CCNG2, CDC25A, CDC25B, CDCA3, CDCA8, CDKN2C, CDKN2D, CENPA, CENPM, CENPP, CENPQ, CENPT, CENPV, CEP55, CEP70, CETN3, CHAMP1, CHEK2, CIT, COASY, CRADD, CRLF3, CSNK1A1, CSNK2A2, CYLD, DAPK3, DDX11, E2F2, E2F4, E2F8, E4F1, EDN1, EMD, ERCC2, ESCO1, ESPL1, FAM83D, FBXO31, FBXW5, FGFR2, FOXO4, GAS1, GPSM2, GTSE1, HAUS2, HELLS, HUS1, IER3, INO80, …
GO:0000280	nuclear division	73	13.7476	0.00617549	[ANAPC15, AURKAIP1, AURKB, BORA, CCNF, CCNG2, CDC25A, CDC25B, CDCA3, CDCA8, CENPT, CENPV, CEP55, CETN3, CHAMP1, CHEK2, CIT, CSNK1A1, DAPK3, DDX11, E4F1, EDN1, ESPL1, FAM83D, FBXW5, FGFR2, FMN2, HAUS2, HELLS, HFM1, HSF1, INO80, KATNB1, KIF18B, KIF22, KIF23, KLHL21, LIF, MAD2L2, MAP9, MAPRE3, MYBL2, NCAPH, NEK1, OFD1, OIP5, OSGIN2, PDE3A, PKMYT1, PLK1, POGZ, PSRC1, PTTG1, RAB33B, RAD51, RB1, RCC1, …
GO:0000394	RNA splicing, via endonucleolytic cleavage and ligation	4	40	0.0141286	[HEXIM1, TRPT1, TSEN34, TSEN54]
GO:0000819	sister chromatid segregation	12	18.4615	0.0319087	[CHAMP1, CIT, DDX11, ESPL1, INO80, KATNB1, NCAPH, PLK1, POGZ, PSRC1, RAB33B, RB1]
GO:0000910	cytokinesis	23	17.8295	0.0061528	[ALKBH4, ANXA11, AURKB, BECN1, CDC25B, CECR2, CENPV, CEP55, CIT, DAPK3, E2F8, ESPL1, FMN2, GIPC1, KIF20A, KIF23, KLHL21, MAP9, NEK7, PLK1, SPIRE2, UNC119, VPS4A]
GO:0001510	RNA methylation	5	25	0.0479426	[ALKBH8, EMG1, METTL14, METTL3, RNMT]
GO:0001522	pseudouridine synthesis	5	26.3158	0.0391693	[PUS1, PUSL1, RPUSD1, TRUB1, TRUB2]
GO:0002446	neutrophil mediated immunity	5	25	0.0479426	[ANXA3, IL6R, KMT2E, LYST, STXBP3]
GO:0002902	regulation of B cell apoptotic process	6	33.3333	0.00735978	[AMH, AURKB, BAX, BCL10, FNIP1, IRS2]
GO:0002903	negative regulation of B cell apoptotic process	4	33.3333	0.028181	[AMH, AURKB, BCL10, IRS2]
GO:0006139	nucleobase-containing compound metabolic process	739	12.5723	3.341297167804462E-13	[AARS2, ABT1, ACACA, ACD, ACHE, ACVR1, ACVRL1, ADAT3, ADCY2, ADCY3, ADCY9, ADK, AGAP2, AGFG1, AGGF1, AGO2, AHRR, AIMP1, AIMP2, ALKBH4, ALKBH8, AMH, ANKRD1, ANXA3, AP5Z1, APOBEC3F, ARHGAP27, ARHGAP9, ARHGEF1, ARHGEF10L, ARHGEF16, ARHGEF17, ARHGEF19, ARHGEF4, ARHGEF6, ARL4C, ARNTL, ASF1B, ASXL3, ATF5, ATF6, ATP5G1, ATP6V1B2, ATXN1, AURKAIP1, AURKB, AXIN1, BAG4, BAX, BAZ2B, BBX, BCL10, BCL2L12, BCOR…
GO:0006152	purine nucleoside catabolic process	85	12.6866	0.0242116	[AGAP2, AGFG1, ARHGAP27, ARHGAP9, ARHGEF1, ARHGEF10L, ARHGEF16, ARHGEF17, ARHGEF19, ARHGEF4, ARHGEF6, ARL4C, AXIN1, CDKL5, CECR1, CHD8, CLPX, CPEB2, DDX11, DDX20, DDX54, DENND1A, DENND4A, DENND4B, DENND5B, DENND6B, DIRAS1, DIS3, DOCK4, DOCK5, EIF2B1, ELMOD2, EPHB3, ERCC2, FBXO8, FGD4, FNIP1, GIT1, GNAQ, GNB3, GNG3, GSK3B, HPRT1, IGHMBP2, INO80, IQSEC2, KATNB1, LAMTOR2, MED12, MLST8, NCOA3, NUDT9,…
GO:0006163	purine nucleotide metabolic process	119	11.9	0.0492981	[ACACA, ADCY2, ADK, AGAP2, AGFG1, ARHGAP27, ARHGAP9, ARHGEF1, ARHGEF10L, ARHGEF16, ARHGEF17, ARHGEF19, ARHGEF4, ARHGEF6, ARL4C, ATP5G1, ATP6V1B2, AXIN1, CALCRL, CBS, CDKL5, CHD8, CLPX, COASY, CPEB2, CROT, DDX11, DDX20, DDX54, DENND1A, DENND4A, DENND4B, DENND5B, DENND6B, DIRAS1, DIS3, DNAJB6, DOCK4, DOCK5, EDN1, EDNRB, EIF2B1, ELMOD2, EPHB3, ERCC2, FBXO8, FGD4, FNIP1, GIT1, GNAL, GNAQ, GNB3, GNG3,…
GO:0006166	purine ribonucleoside salvage	3	60	0.00928406	[ADK, HPRT1, PRTFDC1]
GO:0006177	GMP biosynthetic process	3	50	0.0171527	[HPRT1, IMPDH1, PRTFDC1]
GO:0006195	purine nucleotide catabolic process	92	12.5341	0.0260181	[AGAP2, AGFG1, ARHGAP27, ARHGAP9, ARHGEF1, ARHGEF10L, ARHGEF16, ARHGEF17, ARHGEF19, ARHGEF4, ARHGEF6, ARL4C, AXIN1, CDKL5, CHD8, CLPX, CPEB2, DDX11, DDX20, DDX54, DENND1A, DENND4A, DENND4B, DENND5B, DENND6B, DIRAS1, DIS3, DNAJB6, DOCK4, DOCK5, EIF2B1, ELMOD2, EPHB3, ERCC2, FBXO8, FGD4, FNIP1, GIT1, GNAQ, GNB3, GNG3, GSK3B, HPRT1, IGHMBP2, INO80, IQSEC2, KATNB1, LAMTOR2, MED12, MLST8, MUTYH, NCOA3…
GO:0006260	DNA replication	44	13.75	0.0284582	[ACD, ACHE, ACVRL1, CCNE1, CDC25A, CHEK2, CHTF18, DUT, E2F8, E4F1, ESCO1, FBXW7, GINS3, HUS1, IGHMBP2, INO80, INO80E, LRWD1, MCM6, MMAB, NFIB, NFIC, ORC2, PIF1, PNKP, POLA1, POLD2, POLDIP2, POLL, POT1, RAD51, RAD9A, RECQL4, RECQL5, SLX4, STAG2, TGFB1, TGFB3, TICRR, TIPIN, TK1, TONSL, TOP1MT, WRAP53]
GO:0006325	chromatin organization	78	12.3613	0.049485	[ASF1B, AURKB, BCOR, BCORL1, CARM1, CBX6, CECR2, CENPA, CENPP, CENPQ, CENPV, CHD2, CHD6, CHD8, CTR9, DAPK3, DPY30, FAM175A, H1F0, HDAC5, HDAC6, HDAC9, HELLS, HIST1H1C, HIST1H2BK, HIST2H2BE, HMGN3, HMGN5, INO80, JAK2, KAT2B, KDM1B, KDM3A, KDM5B, KDM7A, KMT2E, L3MBTL2, L3MBTL3, LIF, LRWD1, MBD3, MBIP, MCRS1, MYC, NAP1L5, NCOA3, NCOR1, OGT, OIP5, PIM3, PRMT2, RB1, RBL1, REST, RPS6KA5, RSF1, RUVBL2, …
GO:0006338	chromatin remodeling	22	18.8034	0.00379212	[CECR2, CENPA, CENPP, CENPQ, CENPV, CHD6, CHD8, HDAC5, HELLS, INO80, KAT2B, MYC, OIP5, RB1, RSF1, SATB1, SCMH1, SMARCAD1, SMARCD2, SUPT4H1, TAF6L, TOP1MT]
GO:0006351	transcription, DNA-templated	470	13.4209	1.044659714806598E-11	[ABT1, ACVR1, ACVRL1, AGAP2, AGO2, AHRR, ALKBH4, AMH, ANKRD1, ANXA3, ARHGEF10L, ARNTL, ASF1B, ASXL3, ATF5, ATF6, ATXN1, AURKB, AXIN1, BAZ2B, BBX, BCL10, BCL2L12, BCOR, BCORL1, BDP1, BEX1, BLOC1S2, BRMS1L, BRWD1, C1orf85, C6orf1, CALCOCO1, CAMK4, CAMTA2, CAPN15, CARM1, CBX6, CCDC85B, CCNE1, CCNT2, CDCA7L, CENPB, CHD2, CHD6, CHD8, CHEK2, CIR1, CLU, CNOT8, COPS5, CPSF1, CREB3, CREBL2, CRLF3, CSNK2A2…
GO:0006355	regulation of transcription, DNA-templated	443	14.0234	5.118588896407729E-14	[ABT1, ACVR1, ACVRL1, AGAP2, AGO2, AHRR, ALKBH4, AMH, ANKRD1, ANXA3, ARHGEF10L, ARNTL, ASF1B, ASXL3, ATF5, ATF6, ATXN1, AURKB, AXIN1, BAZ2B, BBX, BCL10, BCL2L12, BCOR, BCORL1, BDP1, BEX1, BLOC1S2, BRMS1L, BRWD1, C1orf85, C6orf1, CALCOCO1, CAMK4, CAMTA2, CAPN15, CARM1, CBX6, CCDC85B, CCNE1, CCNT2, CDCA7L, CENPB, CHD2, CHD6, CHD8, CHEK2, CIR1, CLU, CNOT8, COPS5, CREB3, CREBL2, CRLF3, CSNK2A2, CTDSP…
GO:0006383	transcription from RNA polymerase III promoter	11	18.9655	0.0326329	[BDP1, CHD8, POLR2E, POLR3D, POLR3G, PTPN18, SNAPC1, SNAPC4, TBP, ZNF345, ZNF76]
GO:0006388	tRNA splicing, via endonucleolytic cleavage and ligation	4	44.4444	0.0092204	[HEXIM1, TRPT1, TSEN34, TSEN54]
GO:0006399	tRNA metabolic process	22	16.1765	0.021577	[AARS2, ADAT3, AIMP1, AIMP2, ALKBH8, CARS2, CTU2, FBLL1, FDXACB1, HEXIM1, MOCS3, PUS1, PUSL1, SEPSECS, TPRKB, TRMT13, TRMT44, TRPT1, TRUB1, TRUB2, TSEN34, TSEN54]
GO:0006464	cellular protein modification process	344	12.1598	2.228692106954413E-4	[ACD, ACER2, ACSL1, ACVR1, ACVRL1, ADCY2, ADCY3, ADCY5, ADCY9, ADRBK1, AHRR, AIMP2, ALG11, ALG13, ALG3, ALG6, ALG9, ALKBH4, AMH, ANXA2, ARSK, ATF6, ATP7A, AURKB, AXIN1, B3GALT1, B4GALNT1, B4GALT2, BAG4, BAX, BCL10, BCOR, BLMH, BRAF, BRMS1L, BTG2, CAMK4, CARD10, CARM1, CBS, CCDC88C, CCNE1, CCNF, CCNT2, CDC14B, CDC25A, CDC25B, CDCA3, CDK17, CDKL5, CDKN2C, CDKN2D, CHAMP1, CHEK2, CHM, CHML, CISH, CLU…
GO:0006476	protein deacetylation	13	23.2143	0.00383449	[BRMS1L, HDAC5, HDAC6, HDAC9, NCOR1, REST, SIRT2, SIRT5, SMARCAD1, SREBF1, TADA3, TGFB1, TRPS1]
GO:0006486	protein glycosylation	40	14.1343	0.0239795	[ACER2, ALG11, ALG13, ALG3, ALG6, ALG9, B3GALT1, B4GALNT1, B4GALT2, COG3, DPM2, DPM3, EOGT, GALNT1, GALNT16, GALNT7, GCNT2, GCNT4, GNPNAT1, KAT2B, MANEA, MGAT3, MOGS, MVD, NAGPA, OGT, PARP16, PGM3, PMM1, POGLUT1, SDF2, SIRT2, SIRT5, ST3GAL3, ST3GAL4, ST6GAL1, ST6GALNAC4, ST8SIA1, TET2, TMEM59]
GO:0006488	dolichol-linked oligosaccharide biosynthetic process	11	30.5556	7.001699152195064E-4	[ALG11, ALG13, ALG3, ALG6, ALG9, DPM2, DPM3, GNPNAT1, MVD, PGM3, PMM1]
GO:0006497	protein lipidation	13	18.5714	0.0250639	[DPM2, DPM3, GPAA1, PGAP2, PGAP3, PIGK, PIGZ, PLAUR, ZDHHC15, ZDHHC17, ZDHHC20, ZDHHC22, ZDHHC8]
GO:0006505	GPI anchor metabolic process	8	22.8571	0.023283	[DPM2, DPM3, GPAA1, PGAP2, PGAP3, PIGK, PIGZ, PLAUR]
GO:0006506	GPI anchor biosynthetic process	8	24.2424	0.0165017	[DPM2, DPM3, GPAA1, PGAP2, PGAP3, PIGK, PIGZ, PLAUR]
GO:0006560	proline metabolic process	4	33.3333	0.028181	[ALDH18A1, ALDH4A1, OAT, PYCR2]
GO:0006561	proline biosynthetic process	4	50	0.00557354	[ALDH18A1, ALDH4A1, OAT, PYCR2]
GO:0006611	protein export from nucleus	12	23.0769	0.00564742	[CAMK4, EGR2, EMD, GAS6, GSK3B, PKD1, RANGAP1, SP100, STRADA, TGFB1, UHMK1, XPO6]
GO:0006625	protein targeting to peroxisome	6	31.5789	0.00983509	[PEX1, PEX10, PEX13, PEX6, PEX7, ZNF260]
GO:0006664	glycolipid metabolic process	20	18.5185	0.00667676	[ARSK, B4GALNT1, BAX, CLN6, CTSA, DPM2, DPM3, GPAA1, HEXA, PGAP2, PGAP3, PIGK, PIGZ, PLAUR, SMPD1, ST6GALNAC4, ST8SIA1, STS, SUMF1, UGCG]
GO:0006725	cellular aromatic compound metabolic process	756	12.4547	1.2385582898660122E-12	[AARS2, ABCG2, ABT1, ACACA, ACD, ACHE, ACVR1, ACVRL1, ADAT3, ADCY2, ADCY3, ADCY9, ADK, AGAP2, AGFG1, AGGF1, AGO2, AHRR, AIFM2, AIMP1, AIMP2, ALKBH4, ALKBH8, AMH, ANKRD1, ANXA3, AP5Z1, APOBEC3F, ARHGAP27, ARHGAP9, ARHGEF1, ARHGEF10L, ARHGEF16, ARHGEF17, ARHGEF19, ARHGEF4, ARHGEF6, ARL4C, ARNTL, ASF1B, ASXL3, ATF5, ATF6, ATP5G1, ATP6V1B2, ATP7A, ATXN1, AURKAIP1, AURKB, AXIN1, BAG4, BAX, BAZ2B, BBX,…
GO:0006729	tetrahydrobiopterin biosynthetic process	3	42.8571	0.0277423	[PCBD1, PCBD2, QDPR]
GO:0006753	nucleoside phosphate metabolic process	144	12.2449	0.014013	[ACACA, ADCY2, ADCY3, ADCY9, ADK, AGAP2, AGFG1, ARHGAP27, ARHGAP9, ARHGEF1, ARHGEF10L, ARHGEF16, ARHGEF17, ARHGEF19, ARHGEF4, ARHGEF6, ARL4C, ATP5G1, ATP6V1B2, AXIN1, CALCRL, CBS, CDKL5, CHD8, CLPX, COASY, CPEB2, CROT, DCTPP1, DDX11, DDX20, DDX54, DENND1A, DENND4A, DENND4B, DENND5B, DENND6B, DHODH, DIRAS1, DIS3, DNAJB6, DOCK4, DOCK5, DTYMK, DUT, EDN1, EDNRB, EIF2B1, ELMOD2, EPHB3, ERCC2, EXTL2, F…
GO:0006767	water-soluble vitamin metabolic process	18	18.1818	0.0117414	[AASDHPPT, ACACA, AKR1A1, CD320, COASY, LMBRD1, MMAA, MMAB, MOCS1, MOCS3, MTHFD1, NAPRT1, NFS1, NMNAT2, PCCA, PNPO, PPCDC, RFK]
GO:0006777	Mo-molybdopterin cofactor biosynthetic process	3	42.8571	0.0277423	[MOCS1, MOCS3, NFS1]
GO:0006793	phosphorus metabolic process	365	11.6725	0.00281243	[ACACA, ACD, ACHE, ACSL1, ACSS2, ACVR1, ACVRL1, ADCY2, ADCY3, ADCY5, ADCY9, ADK, ADRBK1, AGAP2, AGFG1, AGPAT4, AMH, ANXA2, ARHGAP27, ARHGAP9, ARHGEF1, ARHGEF10L, ARHGEF16, ARHGEF17, ARHGEF19, ARHGEF4, ARHGEF6, ARL4C, ARL6IP5, ATF6, ATP5G1, ATP6V1B2, ATP7A, ATXN1, AURKB, AXIN1, BAG4, BAX, BCL10, BRAF, CALCRL, CAMK4, CARD10, CBS, CCDC88C, CCNE1, CCNT2, CDC14B, CDC25A, CDC25B, CDK17, CDKL5, CDKN2C, …
GO:0006796	phosphate-containing compound metabolic process	362	11.738	0.0020236	[ACACA, ACD, ACHE, ACSL1, ACVR1, ACVRL1, ADCY2, ADCY3, ADCY5, ADCY9, ADK, ADRBK1, AGAP2, AGFG1, AGPAT4, AMH, ANXA2, ARHGAP27, ARHGAP9, ARHGEF1, ARHGEF10L, ARHGEF16, ARHGEF17, ARHGEF19, ARHGEF4, ARHGEF6, ARL4C, ARL6IP5, ATF6, ATP5G1, ATP6V1B2, ATP7A, ATXN1, AURKB, AXIN1, BAG4, BAX, BCL10, BRAF, CALCRL, CAMK4, CARD10, CBS, CCDC88C, CCNE1, CCNT2, CDC14B, CDC25A, CDC25B, CDK17, CDKL5, CDKN2C, CDKN2D,…
GO:0006910	phagocytosis, recognition	3	37.5	0.0410436	[MEGF10, PEAR1, SCARB1]
GO:0006996	organelle organization	313	11.4067	0.0198115	[AARS2, ACD, AIFM2, ALKBH4, ANAPC15, ANKRD1, ANXA2, ARHGAP4, ARHGDIB, ARHGEF10L, ARHGEF17, ARHGEF19, ARPC3, ASF1B, ATG14, ATP6V0E2, ATP6V1B2, ATP6V1C1, ATP6V1G1, ATP7A, AURKAIP1, AURKB, AXIN1, BAG4, BAX, BBS10, BBS2, BCOR, BCORL1, BECN1, BID, BLOC1S2, BNIP3L, BORA, BRWD1, CAMSAP2, CAPN10, CARM1, CBX6, CCNF, CCNG2, CCSER2, CDC25A, CDC25B, CDCA3, CDCA8, CECR2, CENPA, CENPP, CENPQ, CENPT, CENPV, CEP…
GO:0007010	cytoskeleton organization	119	12.6596	0.00939745	[ALKBH4, ANKRD1, ARHGAP4, ARHGDIB, ARHGEF10L, ARHGEF17, ARHGEF19, ARPC3, AURKB, AXIN1, BAG4, BBS2, BLOC1S2, BORA, BRWD1, CAMSAP2, CAPN10, CCNF, CCSER2, CECR2, CENPA, CEP68, CETN3, CHAMP1, CHEK2, CIT, CNN1, CNTNAP1, CORO1B, CORO6, CROCC, CYLD, DAPK3, DIXDC1, DNAJB6, DVL1, DYNC1LI2, EDN1, EPB41L5, ESPL1, FAM101B, FBXO8, FBXW5, FGD4, FHL3, FITM2, FMN2, GAS2L1, GAS2L3, GPSM2, HAUS2, HAX1, HDAC6, INA,…
GO:0007017	microtubule-based process	80	15.6863	8.018139605029241E-5	[AP3B2, AURKB, AXIN1, BBS2, BLOC1S2, BORA, CAMSAP2, CCNF, CCSER2, CENPA, CEP68, CETN3, CHAMP1, CHEK2, CNTNAP1, CROCC, CYLD, DIXDC1, DNAL4, DVL1, DYNC1LI2, ESPL1, FBXW5, FMN2, GAS2L1, GAS2L3, GPSM2, GSK3B, GTSE1, HAUS2, HDAC6, IFT122, IFT81, IGBP1, INO80, KATNB1, KIF18B, KIF1C, KIF20A, KIF22, KIF23, KIF27, KIF5B, KIF7, KIF9, KIFAP3, KIZ, LYST, MAP9, MED12, MID1IP1, MYBL2, NCOR1, NEK7, NUBP1, NUBP2…
GO:0007018	microtubule-based movement	26	14.8571	0.0355204	[AP3B2, BBS2, BLOC1S2, CNTNAP1, DYNC1LI2, FMN2, HDAC6, IFT122, IFT81, IGBP1, KATNB1, KIF18B, KIF1C, KIF20A, KIF22, KIF23, KIF27, KIF5B, KIF7, KIF9, KIFAP3, MED12, OFD1, RHOT2, SNX29, UXT]
GO:0007040	lysosome organization	8	21.6216	0.0318131	[ACD, BECN1, CLN6, GNPTAB, HEXA, LYST, NAGPA, TPP1]
GO:0007049	cell cycle	206	12.6536	7.189322301436548E-4	[ACVR1, ALKBH4, AMH, ANAPC15, ANXA11, ARNTL, AURKAIP1, AURKB, BAX, BECN1, BEX1, BID, BORA, C9orf69, CABLES2, CCNE1, CCNF, CCNG2, CCNT2, CDC14B, CDC25A, CDC25B, CDCA3, CDCA8, CDKN2C, CDKN2D, CECR2, CENPA, CENPM, CENPP, CENPQ, CENPT, CENPV, CEP55, CEP70, CETN3, CHAMP1, CHEK2, CHTF18, CIT, CNPPD1, COASY, COPS5, CRADD, CREB3, CREBL2, CRLF3, CROCC, CSNK1A1, CSNK2A2, CYLD, DAPK3, DBF4B, DDX11, DIXDC1, …
GO:0007051	spindle organization	21	22.5806	4.108744817210734E-4	[AURKB, BORA, CHEK2, ESPL1, HAUS2, INO80, KIF23, KIZ, MAP9, MYBL2, NCOR1, NEK7, OFD1, PKD1, PSRC1, RCC1, SAC3D1, SENP6, SUN2, TUBG1, UBE2C]
GO:0007052	mitotic spindle organization	10	25	0.00614974	[AURKB, BORA, CHEK2, KIF23, MYBL2, OFD1, PKD1, PSRC1, RCC1, SUN2]
GO:0007059	chromosome segregation	27	15.8824	0.0149283	[AURKB, CENPT, CHAMP1, CIT, DDX11, ERCC2, ESPL1, FBXW7, FMN2, HFM1, INO80, KATNB1, NCAPH, PLK1, POGZ, PSRC1, PTTG1, RAB33B, RB1, RCC1, RECQL4, RECQL5, SETDB2, SKA1, SMARCAD1, STAG2, TOP1MT]
GO:0007067	mitosis	65	17.1504	2.492167385123916E-5	[ANAPC15, AURKAIP1, AURKB, BORA, CCNF, CCNG2, CDC25A, CDC25B, CDCA3, CDCA8, CENPT, CENPV, CEP55, CETN3, CHAMP1, CHEK2, CIT, CSNK1A1, DAPK3, DDX11, E4F1, EDN1, ESPL1, FAM83D, FBXW5, FGFR2, HAUS2, HELLS, INO80, KATNB1, KIF18B, KIF22, KIF23, KLHL21, MAD2L2, MAP9, MAPRE3, MYBL2, NCAPH, NEK1, OFD1, OIP5, PKMYT1, PLK1, POGZ, PSRC1, PTTG1, RAB33B, RB1, RCC1, RECQL5, SAC3D1, SETD8, SETDB2, SH2B1, SIRT2, …
GO:0007088	regulation of mitosis	19	16.6667	0.0235304	[ANAPC15, AURKAIP1, BORA, DAPK3, EDN1, ESPL1, FGFR2, MAD2L2, MAP9, PKMYT1, PLK1, RB1, RCC1, SH2B1, SIRT2, TGFB1, TOM1L1, UBE2C, XRCC3]
GO:0007143	female meiosis	5	27.7778	0.0314498	[CDC25B, FMN2, HSF1, PLK1, SPIRE2]
GO:0007346	regulation of mitotic cell cycle	50	13.4771	0.0286427	[ANAPC15, AURKAIP1, BID, BORA, CDC25B, CHEK2, CRADD, CSNK2A2, CYLD, DAPK3, E4F1, EDN1, ERCC2, ESPL1, FBXO31, FGFR2, FOXO4, GAS1, GTSE1, HUS1, IER3, INO80, MAD2L2, MAP9, MDC1, MTA3, NABP2, NEK7, PIM1, PIM3, PKD1, PKMYT1, PLK1, PRMT2, PSRC1, RAD9A, RB1, RCC1, RPS27L, SCRIB, SH2B1, SIRT2, TCF7L1, TGFB1, TICRR, TIPIN, TOM1L1, UBE2C, XRCC3, ZNF655]
GO:0008033	tRNA processing	17	20	0.00541754	[ADAT3, ALKBH8, CTU2, FBLL1, FDXACB1, HEXIM1, MOCS3, PUS1, PUSL1, TPRKB, TRMT13, TRMT44, TRPT1, TRUB1, TRUB2, TSEN34, TSEN54]
GO:0008156	negative regulation of DNA replication	11	26.1905	0.00280145	[ACD, CHEK2, FBXW7, HUS1, MMAB, PIF1, POT1, STAG2, TGFB1, TGFB3, TIPIN]
GO:0008625	extrinsic apoptotic signaling pathway via death domain receptors	14	17.0732	0.0395629	[BAX, BID, BLOC1S2, CRADD, DEDD, FADD, FAS, MOAP1, NGFRAP1, NOS3, SP100, STK24, TNFAIP3, TRPS1]
GO:0008652	cellular amino acid biosynthetic process	19	15.8333	0.0377645	[ALDH18A1, ALDH4A1, BCAT2, CBS, CDO1, CHDH, DOHH, EIF2B1, EIF5A2, GGT7, GPT2, MTHFD1, MTHFD1L, MTHFSD, OAT, PNKD, PSPH, PTDSS2, PYCR2]
GO:0009059	macromolecule biosynthetic process	606	12.9349	1.7289369918601774E-12	[AARS2, AASDHPPT, ABCC5, ABT1, ACD, ACER2, ACHE, ACVR1, ACVRL1, AGAP2, AGO2, AHRR, AIFM2, AIMP1, AIMP2, ALG11, ALG13, ALG3, ALG6, ALG9, ALKBH4, AMH, ANKRD1, ANXA3, ARHGEF10L, ARNTL, ASF1B, ASXL3, ATF5, ATF6, ATP7A, ATXN1, AURKAIP1, AURKB, AXIN1, B3GALT1, B4GALNT1, B4GALT2, BAZ2B, BBX, BCL10, BCL2L12, BCOR, BCORL1, BDP1, BEX1, BLOC1S2, BRMS1L, BRWD1, BTG2, C1orf85, C6orf1, CALCOCO1, CAMK4, CAMTA2,…
GO:0009101	glycoprotein biosynthetic process	47	13.3903	0.0363776	[ACER2, ALG11, ALG13, ALG3, ALG6, ALG9, ATP7A, B3GALT1, B4GALNT1, B4GALT2, COG3, DPM2, DPM3, EOGT, EXTL2, GALNT1, GALNT16, GALNT7, GCNT2, GCNT4, GNPNAT1, HBEGF, KAT2B, MANEA, MGAT3, MOGS, MVD, NAGPA, NCAN, NDST2, OGT, PARP16, PAWR, PGM3, PMM1, POGLUT1, SDF2, SIRT2, SIRT5, ST3GAL3, ST3GAL4, ST6GAL1, ST6GALNAC4, ST8SIA1, TET2, TMEM59, XYLT2]
GO:0009108	coenzyme biosynthetic process	20	17.2414	0.0145252	[ACACA, ACSL1, ACSS2, COASY, COQ3, ELOVL1, MOCS1, MOCS3, MTHFD1, MTHFD1L, MTHFSD, NAPRT1, NFS1, NMNAT2, PCBD1, PCBD2, PPCDC, QDPR, RFK, SLC25A1]
GO:0009113	purine nucleobase biosynthetic process	4	28.5714	0.0482955	[CECR1, COASY, HPRT1, PRTFDC1]
GO:0009116	nucleoside metabolic process	113	12.9736	0.00540386	[ACACA, ADK, AGAP2, AGFG1, APOBEC3F, ARHGAP27, ARHGAP9, ARHGEF1, ARHGEF10L, ARHGEF16, ARHGEF17, ARHGEF19, ARHGEF4, ARHGEF6, ARL4C, ATP5G1, ATP6V1B2, AXIN1, CDKL5, CECR1, CHD8, CLPX, COASY, CPEB2, CROT, DDX11, DDX20, DDX54, DENND1A, DENND4A, DENND4B, DENND5B, DENND6B, DHODH, DIRAS1, DIS3, DNAJB6, DOCK4, DOCK5, DUT, EIF2B1, ELMOD2, EPHB3, ERCC2, FBXO8, FGD4, FNIP1, GIT1, GNAQ, GNB3, GNG3, GSK3B, GU…
GO:0009117	nucleotide metabolic process	143	12.2118	0.0155947	[ACACA, ADCY2, ADCY3, ADCY9, ADK, AGAP2, AGFG1, ARHGAP27, ARHGAP9, ARHGEF1, ARHGEF10L, ARHGEF16, ARHGEF17, ARHGEF19, ARHGEF4, ARHGEF6, ARL4C, ATP5G1, ATP6V1B2, AXIN1, CALCRL, CBS, CDKL5, CHD8, CLPX, COASY, CPEB2, CROT, DDX11, DDX20, DDX54, DENND1A, DENND4A, DENND4B, DENND5B, DENND6B, DHODH, DIRAS1, DIS3, DNAJB6, DOCK4, DOCK5, DTYMK, DUT, EDN1, EDNRB, EIF2B1, ELMOD2, EPHB3, ERCC2, EXTL2, FBXO8, FD…
GO:0009118	regulation of nucleoside metabolic process	53	13.1841	0.0356495	[AGAP2, AGFG1, ARHGAP27, ARHGAP9, ARHGEF1, ARHGEF10L, ARHGEF16, ARHGEF17, ARHGEF19, ARHGEF4, ARHGEF6, AXIN1, CDKL5, CPEB2, DENND1A, DENND4A, DENND4B, DENND5B, DENND6B, DIS3, DNAJB6, DOCK4, DOCK5, EIF2B1, ELMOD2, EPHB3, FBXO8, FGD4, FNIP1, GIT1, GNAQ, GSK3B, IQSEC2, LAMTOR2, MLST8, PGAM5, RALGAPA2, RANGAP1, RANGRF, RAP1B, RAPGEF1, RCC1, RGS19, RHOG, RP2, SCRIB, SIPA1, SYDE1, TBC1D10B, TBCD, TMEM64…
GO:0009119	ribonucleoside metabolic process	105	12.8519	0.00937084	[ACACA, ADK, AGAP2, AGFG1, APOBEC3F, ARHGAP27, ARHGAP9, ARHGEF1, ARHGEF10L, ARHGEF16, ARHGEF17, ARHGEF19, ARHGEF4, ARHGEF6, ARL4C, ATP5G1, ATP6V1B2, AXIN1, CDKL5, CECR1, CHD8, CLPX, COASY, CPEB2, CROT, DDX11, DDX20, DDX54, DENND1A, DENND4A, DENND4B, DENND5B, DENND6B, DHODH, DIRAS1, DIS3, DOCK4, DOCK5, EIF2B1, ELMOD2, EPHB3, ERCC2, FBXO8, FGD4, FNIP1, GIT1, GNAQ, GNB3, GNG3, GSK3B, GUK1, HPRT1, IG…
GO:0009123	nucleoside monophosphate metabolic process	37	14.5098	0.0201805	[ADK, ATP5G1, ATP6V1B2, CHD8, CLPX, COASY, DDX11, DDX20, DDX54, DHODH, DTYMK, DUT, ERCC2, GUK1, HPRT1, IGHMBP2, IMPDH1, INO80, KATNB1, NUDT9, PEX1, PEX6, PIF1, PRPS2, PRTFDC1, RAD51, RFK, RUVBL2, SLC25A25, TGFB1, TK1, TOR3A, UCK1, UPP1, VPS4A, VPS4B, ZNF260]
GO:0009141	nucleoside triphosphate metabolic process	92	12.4157	0.0321682	[ADK, AGAP2, AGFG1, ARHGAP27, ARHGAP9, ARHGEF1, ARHGEF10L, ARHGEF16, ARHGEF17, ARHGEF19, ARHGEF4, ARHGEF6, ARL4C, ATP5G1, ATP6V1B2, AXIN1, CDKL5, CHD8, CLPX, CPEB2, DCTPP1, DDX11, DDX20, DDX54, DENND1A, DENND4A, DENND4B, DENND5B, DENND6B, DIRAS1, DIS3, DOCK4, DOCK5, DTYMK, DUT, EIF2B1, ELMOD2, EPHB3, ERCC2, FBXO8, FGD4, FNIP1, GIT1, GNAQ, GNB3, GNG3, GSK3B, GUK1, IGHMBP2, INO80, IQSEC2, KATNB1, L…
GO:0009143	nucleoside triphosphate catabolic process	82	12.368	0.0444786	[AGAP2, AGFG1, ARHGAP27, ARHGAP9, ARHGEF1, ARHGEF10L, ARHGEF16, ARHGEF17, ARHGEF19, ARHGEF4, ARHGEF6, ARL4C, AXIN1, CDKL5, CHD8, CLPX, CPEB2, DCTPP1, DDX11, DDX20, DDX54, DENND1A, DENND4A, DENND4B, DENND5B, DENND6B, DIRAS1, DIS3, DOCK4, DOCK5, EIF2B1, ELMOD2, EPHB3, ERCC2, FBXO8, FGD4, FNIP1, GIT1, GNAQ, GNB3, GNG3, GSK3B, IGHMBP2, INO80, IQSEC2, KATNB1, LAMTOR2, MED12, MLST8, NCOA3, PEX1, PEX6, …
GO:0009144	purine nucleoside triphosphate metabolic process	88	12.2392	0.0476896	[ADK, AGAP2, AGFG1, ARHGAP27, ARHGAP9, ARHGEF1, ARHGEF10L, ARHGEF16, ARHGEF17, ARHGEF19, ARHGEF4, ARHGEF6, ARL4C, ATP5G1, ATP6V1B2, AXIN1, CDKL5, CHD8, CLPX, CPEB2, DDX11, DDX20, DDX54, DENND1A, DENND4A, DENND4B, DENND5B, DENND6B, DIRAS1, DIS3, DOCK4, DOCK5, EIF2B1, ELMOD2, EPHB3, ERCC2, FBXO8, FGD4, FNIP1, GIT1, GNAQ, GNB3, GNG3, GSK3B, GUK1, IGHMBP2, INO80, IQSEC2, KATNB1, LAMTOR2, MED12, MLST8…
GO:0009154	purine ribonucleotide catabolic process	86	12.5547	0.0295225	[AGAP2, AGFG1, ARHGAP27, ARHGAP9, ARHGEF1, ARHGEF10L, ARHGEF16, ARHGEF17, ARHGEF19, ARHGEF4, ARHGEF6, ARL4C, AXIN1, CDKL5, CHD8, CLPX, CPEB2, DDX11, DDX20, DDX54, DENND1A, DENND4A, DENND4B, DENND5B, DENND6B, DIRAS1, DIS3, DOCK4, DOCK5, EIF2B1, ELMOD2, EPHB3, ERCC2, FBXO8, FGD4, FNIP1, GIT1, GNAQ, GNB3, GNG3, GSK3B, HPRT1, IGHMBP2, INO80, IQSEC2, KATNB1, LAMTOR2, MED12, MLST8, NCOA3, NUDT9, PDE3A,…
GO:0009161	ribonucleoside monophosphate metabolic process	34	13.9344	0.0418953	[ADK, ATP5G1, ATP6V1B2, CHD8, CLPX, COASY, DDX11, DDX20, DDX54, DHODH, ERCC2, GUK1, HPRT1, IGHMBP2, IMPDH1, INO80, KATNB1, NUDT9, PEX1, PEX6, PIF1, PRPS2, PRTFDC1, RAD51, RFK, RUVBL2, SLC25A25, TGFB1, TOR3A, UCK1, UPP1, VPS4A, VPS4B, ZNF260]
GO:0009163	nucleoside biosynthetic process	21	16.6667	0.017935	[ACACA, ADK, ATP5G1, CECR1, COASY, DHODH, DUT, GUK1, HPRT1, IMPDH1, NME1, PPCDC, PRPS2, PRTFDC1, RP2, SLC35B2, SLC35B3, TGFB1, TK1, UCK1, UPP1]
GO:0009164	nucleoside catabolic process	88	12.7168	0.0209729	[AGAP2, AGFG1, APOBEC3F, ARHGAP27, ARHGAP9, ARHGEF1, ARHGEF10L, ARHGEF16, ARHGEF17, ARHGEF19, ARHGEF4, ARHGEF6, ARL4C, AXIN1, CDKL5, CECR1, CHD8, CLPX, CPEB2, DDX11, DDX20, DDX54, DENND1A, DENND4A, DENND4B, DENND5B, DENND6B, DIRAS1, DIS3, DOCK4, DOCK5, EIF2B1, ELMOD2, EPHB3, ERCC2, FBXO8, FGD4, FNIP1, GIT1, GNAQ, GNB3, GNG3, GSK3B, HPRT1, IGHMBP2, INO80, IQSEC2, KATNB1, LAMTOR2, MED12, MLST8, NCO…
GO:0009166	nucleotide catabolic process	94	12.4834	0.0270648	[AGAP2, AGFG1, ARHGAP27, ARHGAP9, ARHGEF1, ARHGEF10L, ARHGEF16, ARHGEF17, ARHGEF19, ARHGEF4, ARHGEF6, ARL4C, AXIN1, CDKL5, CHD8, CLPX, CPEB2, DDX11, DDX20, DDX54, DENND1A, DENND4A, DENND4B, DENND5B, DENND6B, DIRAS1, DIS3, DNAJB6, DOCK4, DOCK5, EIF2B1, ELMOD2, EPHB3, ERCC2, FBXO8, FGD4, FNIP1, GIT1, GNAQ, GNB3, GNG3, GSK3B, HPRT1, IGHMBP2, INO80, IQSEC2, KATNB1, LAMTOR2, MED12, MLST8, MUTYH, NCOA3…
GO:0009203	ribonucleoside triphosphate catabolic process	81	12.3288	0.0484327	[AGAP2, AGFG1, ARHGAP27, ARHGAP9, ARHGEF1, ARHGEF10L, ARHGEF16, ARHGEF17, ARHGEF19, ARHGEF4, ARHGEF6, ARL4C, AXIN1, CDKL5, CHD8, CLPX, CPEB2, DDX11, DDX20, DDX54, DENND1A, DENND4A, DENND4B, DENND5B, DENND6B, DIRAS1, DIS3, DOCK4, DOCK5, EIF2B1, ELMOD2, EPHB3, ERCC2, FBXO8, FGD4, FNIP1, GIT1, GNAQ, GNB3, GNG3, GSK3B, IGHMBP2, INO80, IQSEC2, KATNB1, LAMTOR2, MED12, MLST8, NCOA3, PEX1, PEX6, PGAM5, P…
GO:0009207	purine ribonucleoside triphosphate catabolic process	81	12.3288	0.0484327	[AGAP2, AGFG1, ARHGAP27, ARHGAP9, ARHGEF1, ARHGEF10L, ARHGEF16, ARHGEF17, ARHGEF19, ARHGEF4, ARHGEF6, ARL4C, AXIN1, CDKL5, CHD8, CLPX, CPEB2, DDX11, DDX20, DDX54, DENND1A, DENND4A, DENND4B, DENND5B, DENND6B, DIRAS1, DIS3, DOCK4, DOCK5, EIF2B1, ELMOD2, EPHB3, ERCC2, FBXO8, FGD4, FNIP1, GIT1, GNAQ, GNB3, GNG3, GSK3B, IGHMBP2, INO80, IQSEC2, KATNB1, LAMTOR2, MED12, MLST8, NCOA3, PEX1, PEX6, PGAM5, P…
GO:0009247	glycolipid biosynthetic process	11	21.1538	0.0152446	[B4GALNT1, DPM2, DPM3, GPAA1, PGAP2, PGAP3, PIGK, PIGZ, PLAUR, ST8SIA1, UGCG]
GO:0009259	ribonucleotide metabolic process	116	12.0582	0.0378325	[ACACA, ADCY2, ADK, AGAP2, AGFG1, ARHGAP27, ARHGAP9, ARHGEF1, ARHGEF10L, ARHGEF16, ARHGEF17, ARHGEF19, ARHGEF4, ARHGEF6, ARL4C, ATP5G1, ATP6V1B2, AXIN1, CALCRL, CBS, CDKL5, CHD8, CLPX, COASY, CPEB2, CROT, DDX11, DDX20, DDX54, DENND1A, DENND4A, DENND4B, DENND5B, DENND6B, DHODH, DIRAS1, DIS3, DOCK4, DOCK5, EDN1, EDNRB, EIF2B1, ELMOD2, EPHB3, ERCC2, FBXO8, FGD4, FNIP1, GIT1, GNAL, GNAQ, GNB3, GNG3, …
GO:0009261	ribonucleotide catabolic process	86	12.5364	0.0304594	[AGAP2, AGFG1, ARHGAP27, ARHGAP9, ARHGEF1, ARHGEF10L, ARHGEF16, ARHGEF17, ARHGEF19, ARHGEF4, ARHGEF6, ARL4C, AXIN1, CDKL5, CHD8, CLPX, CPEB2, DDX11, DDX20, DDX54, DENND1A, DENND4A, DENND4B, DENND5B, DENND6B, DIRAS1, DIS3, DOCK4, DOCK5, EIF2B1, ELMOD2, EPHB3, ERCC2, FBXO8, FGD4, FNIP1, GIT1, GNAQ, GNB3, GNG3, GSK3B, HPRT1, IGHMBP2, INO80, IQSEC2, KATNB1, LAMTOR2, MED12, MLST8, NCOA3, NUDT9, PDE3A,…
GO:0009262	deoxyribonucleotide metabolic process	8	21.6216	0.0318131	[ADK, DTYMK, DUT, GUK1, MUTYH, NT5C, SMUG1, TK1]
GO:0009263	deoxyribonucleotide biosynthetic process	4	33.3333	0.028181	[ADK, DTYMK, DUT, GUK1]
GO:0009265	2'-deoxyribonucleotide biosynthetic process	4	44.4444	0.0092204	[ADK, DTYMK, DUT, GUK1]
GO:0009267	cellular response to starvation	21	20.1923	0.00189054	[ATG14, BECN1, C12orf5, CPEB4, DAP, DNPEP, FBXO22, FNIP1, GAS2L1, GAS6, HDAC6, IFI16, IFT88, MYBBP1A, NBR1, PCSK9, RAB33B, SCOC, SREBF1, TP53INP2, UPP1]
GO:0009394	2'-deoxyribonucleotide metabolic process	7	22.5806	0.0349676	[ADK, DTYMK, DUT, GUK1, MUTYH, NT5C, SMUG1]
GO:0009451	RNA modification	14	20.8955	0.00745342	[ALKBH8, APOBEC3F, BAG4, CTU2, EMG1, METTL14, METTL3, MOCS3, PUS1, PUSL1, RNMT, RPUSD1, TRUB1, TRUB2]
GO:0009791	post-embryonic development	16	16.1616	0.0455288	[AGO2, ATF5, BAX, CCDC66, ERCC2, FGFR2, GNAQ, IREB2, ITPR1, MAPK8IP3, MORC3, PPP1R13L, RAB3A, SEPP1, SLC37A4, TET2]
GO:0009889	regulation of biosynthetic process	502	13.3333	3.925933673100919E-12	[ABT1, ACD, ACER2, ACVR1, ACVRL1, AGAP2, AGO2, AHRR, AIFM2, ALKBH4, AMH, ANKRD1, ANXA3, ARHGEF10L, ARNTL, ASF1B, ASXL3, ATF5, ATF6, ATXN1, AURKAIP1, AURKB, AXIN1, BAZ2B, BBX, BCL10, BCL2L12, BCOR, BCORL1, BDP1, BEX1, BLOC1S2, BRMS1L, BRWD1, BTG2, C1orf85, C6orf1, CALCOCO1, CALCRL, CAMK4, CAMTA2, CAPN15, CARM1, CBX6, CCDC85B, CCNE1, CCNT2, CDCA7L, CENPB, CHD2, CHD6, CHD8, CHEK2, CIR1, CIRBP, CLU, …
GO:0009890	negative regulation of biosynthetic process	143	12.3276	0.0115406	[ACD, ACER2, ACVRL1, AGO2, AHRR, AIFM2, ANKRD1, ATXN1, AURKB, AXIN1, BCOR, BRMS1L, BTG2, CBX6, CCDC85B, CHD8, CHEK2, CIR1, CPEB2, CTR9, CUX2, DAP, DAPK3, DDX20, DEDD, DNAJB6, DNPEP, E2F8, E4F1, EDN1, EDNRB, EIF2B1, EZH1, FBXW7, FGFR2, FNIP1, GAS6, GATAD2A, GLIS3, GPS2, GRB10, GSK3B, HBEGF, HCFC2, HDAC5, HDAC6, HDAC9, HELLS, HEXIM1, HUS1, IFI16, IGBP1, IL6R, INPP5D, INSIG2, IRF7, KDM5B, KLF11, LMC…
GO:0009894	regulation of catabolic process	102	13.7652	0.00130686	[AGAP2, AGFG1, AGO2, ARHGAP27, ARHGAP9, ARHGEF1, ARHGEF10L, ARHGEF16, ARHGEF17, ARHGEF19, ARHGEF4, ARHGEF6, ARNTL, ATG14, AXIN1, BAX, BECN1, BTG2, C12orf5, CDKL5, CHEK2, CLU, CPEB2, CSNK2A2, CSNK2A3, DAP, DAPK3, DEDD, DENND1A, DENND4A, DENND4B, DENND5B, DENND6B, DHX34, DIS3, DNAJB6, DNPEP, DOCK4, DOCK5, DVL1, EIF2B1, ELMOD2, EPHB3, FBXO22, FBXO8, FBXW7, FGD4, FMN2, FNIP1, GIPC1, GIT1, GLMN, GNAQ,…
GO:0010467	gene expression	661	12.3045	1.864181668946322E-9	[AARS2, ABT1, ACD, ACER2, ACVR1, ACVRL1, ADAT3, ADK, AGAP2, AGFG1, AGGF1, AGO2, AHRR, AIFM2, AIMP1, AIMP2, ALKBH4, ALKBH8, AMH, ANKRD1, ANXA3, APOBEC3F, ARHGEF10L, ARNTL, ASF1B, ASXL3, ATF5, ATF6, ATG4A, ATP7A, ATXN1, AURKAIP1, AURKB, AXIN1, BAX, BAZ2B, BBS2, BBX, BCL10, BCL2L12, BCOR, BCORL1, BDP1, BEX1, BID, BLMH, BLOC1S2, BOK, BRAF, BRMS1L, BRWD1, BTG2, C1orf85, C6orf1, CALCOCO1, CAMK4, CAMTA2…
GO:0010468	regulation of gene expression	511	13.2418	7.303677911222802E-12	[ABT1, ACVR1, ACVRL1, ADK, AGAP2, AGO2, AHRR, AIFM2, ALKBH4, AMH, ANKRD1, ANXA3, APOBEC3F, ARHGEF10L, ARNTL, ASF1B, ASXL3, ATF5, ATF6, ATP7A, ATXN1, AURKAIP1, AURKB, AXIN1, BAZ2B, BBS2, BBX, BCL10, BCL2L12, BCOR, BCORL1, BDP1, BEX1, BLOC1S2, BRAF, BRMS1L, BRWD1, BTG2, C1orf85, C6orf1, CALCOCO1, CAMK4, CAMTA2, CAPN15, CARM1, CBX6, CCDC85B, CCDC88C, CCNE1, CCNT2, CDCA7L, CENPB, CHD2, CHD6, CHD8, CH…
GO:0010506	regulation of autophagy	13	17.3333	0.0415433	[ATG14, BECN1, C12orf5, DAP, DAPK3, DNPEP, IFI16, IFT88, KIAA0226, RAB33B, SCOC, TMEM59, TP53INP2]
GO:0010556	regulation of macromolecule biosynthetic process	490	13.7602	3.348577688578937E-14	[ABT1, ACD, ACER2, ACVR1, ACVRL1, AGAP2, AGO2, AHRR, AIFM2, ALKBH4, AMH, ANKRD1, ANXA3, ARHGEF10L, ARNTL, ASF1B, ASXL3, ATF5, ATF6, ATXN1, AURKAIP1, AURKB, AXIN1, BAZ2B, BBX, BCL10, BCL2L12, BCOR, BCORL1, BDP1, BEX1, BLOC1S2, BRMS1L, BRWD1, BTG2, C1orf85, C6orf1, CALCOCO1, CAMK4, CAMTA2, CAPN15, CARM1, CBX6, CCDC85B, CCNE1, CCNT2, CDCA7L, CENPB, CHD2, CHD6, CHD8, CHEK2, CIR1, CIRBP, CLU, CNOT8, C…
GO:0010558	negative regulation of macromolecule biosynthetic process	141	12.9596	0.00208042	[ACD, ACER2, ACVRL1, AGO2, AHRR, AIFM2, ANKRD1, ATXN1, AURKB, AXIN1, BCOR, BRMS1L, BTG2, CBX6, CCDC85B, CHD8, CHEK2, CIR1, CPEB2, CTR9, CUX2, DAP, DAPK3, DDX20, DEDD, DNAJB6, DNPEP, E2F8, E4F1, EDN1, EDNRB, EIF2B1, EZH1, FBXW7, FGFR2, FNIP1, GAS6, GATAD2A, GLIS3, GPS2, GRB10, GSK3B, HBEGF, HCFC2, HDAC5, HDAC6, HDAC9, HELLS, HEXIM1, HUS1, IFI16, IGBP1, IL6R, INPP5D, IRF7, KDM5B, KLF11, LMCD1, MAD2…
GO:0010564	regulation of cell cycle process	69	14.7436	0.00137276	[AMH, ANAPC15, AURKAIP1, AURKB, BID, BORA, CCNF, CDC25B, CENPV, CHEK2, CRADD, CRLF3, CSNK2A2, DAPK3, E2F8, E4F1, EDN1, ERCC2, ESPL1, FBXO31, FBXW7, FGFR2, FOXO4, GIPC1, GTSE1, HSF1, HUS1, IER3, INO80, KIF23, KLHL21, LIF, MAD2L2, MAP9, MDC1, MED25, MTA3, MYBBP1A, NABP2, NUBP1, NUBP2, PDE3A, PIM1, PKD1, PKMYT1, PLK1, PRMT2, PSRC1, RAD9A, RASSF1, RB1, RCC1, RECQL4, RHNO1, RPS27L, SENP6, SH2B1, SIRT2…
GO:0010605	negative regulation of macromolecule metabolic process	186	11.6323	0.0364018	[ACD, ACER2, ACVRL1, AGAP2, AGO2, AHRR, AIFM2, AMH, ANKRD1, APOBEC3F, ATXN1, AURKB, AXIN1, BAG4, BAX, BBS2, BCL2L12, BCOR, BRMS1L, BTG2, CBX6, CCDC85B, CDKN2C, CDKN2D, CHD8, CHEK2, CIR1, CNOT8, CPEB2, CRTAP, CTR9, CUX2, DAP, DAPK3, DDX20, DEDD, DHX34, DNAJB6, DNPEP, DVL1, E2F8, E4F1, EDN1, EDNRB, EIF2B1, EZH1, FAM129A, FBXW7, FGFR2, FMN2, FNIP1, GAS1, GAS2L1, GAS6, GATAD2A, GIPC1, GLIS3, GLMN, GN…
GO:0010639	negative regulation of organelle organization	35	14.6444	0.0205925	[ACD, ANAPC15, AURKAIP1, AURKB, BCOR, CCNF, CORO1B, ESPL1, FGFR2, GAS2L1, HDAC6, IER3, KANK1, KATNB1, KDM3A, LIF, MAD2L2, MED12, MID1IP1, NUBP1, NUBP2, PIF1, PLK1, POT1, PRELID1, RECQL4, SPTBN2, SPTBN5, TBCD, TMEM67, TMSB15B, TOM1L1, TRIM9, UBE2C, XRCC3]
GO:0010770	positive regulation of cell morphogenesis involved in differentiation	9	19.1489	0.0478523	[EPB41L5, GCNT2, GLIPR2, LIF, NCOA3, RAC3, TGFB1, TGFB1I1, TGFB3]
GO:0010800	positive regulation of peptidyl-threonine phosphorylation	5	33.3333	0.0142879	[AXIN1, GSK3B, PLK1, TGFB1, WNK3]
GO:0010824	regulation of centrosome duplication	5	25	0.0479426	[CCNF, NUBP1, NUBP2, TMEM67, XRCC3]
GO:0010826	negative regulation of centrosome duplication	4	80	5.138790889750311E-4	[CCNF, NUBP1, NUBP2, TMEM67]
GO:0010866	regulation of triglyceride biosynthetic process	5	35.7143	0.0103917	[CTDNEP1, FBXW7, FITM2, SCARB1, SREBF1]
GO:0010948	negative regulation of cell cycle process	38	15.0794	0.010503	[AMH, ANAPC15, AURKAIP1, CCNF, CHEK2, CRADD, CSNK2A2, E2F8, ESPL1, FBXO31, FBXW7, FGFR2, FOXO4, GTSE1, HUS1, IER3, LIF, MAD2L2, MDC1, NABP2, NUBP1, NUBP2, PLK1, PRMT2, RAD9A, RASSF1, RB1, RECQL4, RPS27L, STAG2, TGFB1, TICRR, TIPIN, TMEM67, TOM1L1, UBE2C, XRCC3, ZNF655]
GO:0010950	positive regulation of endopeptidase activity	20	15.625	0.0381063	[ACER2, ARL6IP5, BAX, BCL10, BID, BOK, CARD8, CRADD, DAP, DNPEP, FADD, FAS, IFI16, JAK2, MYC, NGFRAP1, NLRP2, PRELID1, REST, RPS27L]
GO:0010952	positive regulation of peptidase activity	21	15.9091	0.0287459	[ACER2, ARL6IP5, BAX, BCL10, BID, BOK, CARD8, CLPX, CRADD, DAP, DNPEP, FADD, FAS, IFI16, JAK2, MYC, NGFRAP1, NLRP2, PRELID1, REST, RPS27L]
GO:0016070	RNA metabolic process	545	12.7784	4.7336035446152E-10	[AARS2, ABT1, ACVR1, ACVRL1, ADAT3, AGAP2, AGGF1, AGO2, AHRR, AIMP1, AIMP2, ALKBH4, ALKBH8, AMH, ANKRD1, ANXA3, APOBEC3F, ARHGEF10L, ARNTL, ASF1B, ASXL3, ATF5, ATF6, ATXN1, AURKAIP1, AURKB, AXIN1, BAG4, BAZ2B, BBX, BCL10, BCL2L12, BCOR, BCORL1, BDP1, BEX1, BLOC1S2, BRMS1L, BRWD1, BTG2, C1orf85, C6orf1, CALCOCO1, CAMK4, CAMTA2, CAPN15, CARM1, CARS2, CBX6, CCDC85B, CCNE1, CCNT2, CDCA7L, CELF5, CENP…
GO:0016226	iron-sulfur cluster assembly	7	46.6667	3.691423981022593E-4	[ISCA1, NARFL, NDOR1, NFS1, NFU1, NUBP1, NUBP2]
GO:0016255	attachment of GPI anchor to protein	3	42.8571	0.0277423	[GPAA1, PIGK, PLAUR]
GO:0016558	protein import into peroxisome matrix	6	42.8571	0.00170731	[PEX1, PEX10, PEX13, PEX6, PEX7, ZNF260]
GO:0016567	protein ubiquitination	73	12.5	0.045731	[AIMP2, AXIN1, BCL10, BCOR, BLMH, CCNF, CDC14B, CDCA3, CISH, CLU, CNOT4, CRBN, CTR9, DTX2, DZIP3, E4F1, ERCC8, FBXL3, FBXO22, FBXO3, FBXO31, FBXO33, FBXO9, FBXW5, FBXW7, GLMN, HDAC6, HECW1, HERC3, IRAK1, KLHL15, KLHL21, MAD2L2, MKRN3, MYLIP, NEURL1B, NEURL2, NSMCE1, NUB1, OGT, PELI3, PINK1, PLK1, RASSF1, RASSF3, RLIM, RNF13, RNF139, RNF144A, RNF167, RNF7, RUSC1, SOCS3, SOCS4, SPSB3, SUZ12, TNFAIP…
GO:0016568	chromatin modification	72	14.4578	0.00185088	[ASF1B, AURKB, BCOR, BCORL1, CARM1, CBX6, CECR2, CENPA, CENPP, CENPQ, CENPV, CHD2, CHD6, CHD8, CTR9, DAPK3, DPY30, FAM175A, HDAC5, HDAC6, HDAC9, HELLS, HMGN3, HMGN5, INO80, JAK2, KAT2B, KDM1B, KDM3A, KDM5B, KDM7A, KMT2E, L3MBTL2, L3MBTL3, LIF, LRWD1, MBD3, MBIP, MCRS1, MYC, NCOA3, NCOR1, OGT, OIP5, PIM3, PRMT2, RB1, RBL1, REST, RPS6KA5, RSF1, RUVBL2, SATB1, SCMH1, SETD8, SETDB2, SIRT2, SMARCAD1, …
GO:0016569	covalent chromatin modification	44	13.3333	0.0443007	[AURKB, BCOR, CARM1, CTR9, DPY30, HDAC5, HDAC6, HDAC9, HELLS, JAK2, KAT2B, KDM1B, KDM3A, KDM5B, KDM7A, KMT2E, LIF, MBD3, MBIP, MCRS1, NCOA3, NCOR1, OGT, PIM3, PRMT2, REST, RPS6KA5, RUVBL2, SATB1, SETD8, SETDB2, SIRT2, SMARCAD1, SREBF1, SUPT3H, SUZ12, TADA3, TAF10, TAF12, TAF6L, TCF7L1, TET2, TGFB1, TRPS1]
GO:0016570	histone modification	43	13.2716	0.0493326	[AURKB, BCOR, CARM1, CTR9, DPY30, HDAC5, HDAC6, HDAC9, JAK2, KAT2B, KDM1B, KDM3A, KDM5B, KDM7A, KMT2E, LIF, MBD3, MBIP, MCRS1, NCOA3, NCOR1, OGT, PIM3, PRMT2, REST, RPS6KA5, RUVBL2, SATB1, SETD8, SETDB2, SIRT2, SMARCAD1, SREBF1, SUPT3H, SUZ12, TADA3, TAF10, TAF12, TAF6L, TCF7L1, TET2, TGFB1, TRPS1]
GO:0016575	histone deacetylation	11	24.4444	0.00498541	[HDAC5, HDAC6, HDAC9, NCOR1, REST, SIRT2, SMARCAD1, SREBF1, TADA3, TGFB1, TRPS1]
GO:0018105	peptidyl-serine phosphorylation	27	15.6977	0.0172255	[ADRBK1, AMH, AURKB, AXIN1, BAG4, BAX, BRAF, CREBL2, FNIP1, GAS6, GSK3B, HAX1, HIPK3, IL11, LIF, MAD2L2, MKNK1, MMAB, MORC3, PIK3CA, PINK1, PKD1, PLK1, RPS6KA5, TBK1, TGFB1, UHMK1]
GO:0018130	heterocycle biosynthetic process	534	13.2671	1.189103416220172E-12	[ABT1, ACACA, ACVR1, ACVRL1, ADCY2, ADCY3, ADCY9, ADK, AGAP2, AGO2, AHRR, AIFM2, ALDH18A1, ALDH4A1, ALKBH4, AMH, ANKRD1, ANXA3, ARHGEF10L, ARNTL, ASF1B, ASXL3, ATF5, ATF6, ATP5G1, ATXN1, AURKAIP1, AURKB, AXIN1, BAZ2B, BBX, BCL10, BCL2L12, BCOR, BCORL1, BDP1, BEX1, BLOC1S2, BRMS1L, BRWD1, C1orf85, C6orf1, CALCOCO1, CALCRL, CAMK4, CAMTA2, CAPN15, CARM1, CBX6, CCDC85B, CCNE1, CCNT2, CDCA7L, CDKN2D, …
GO:0018196	peptidyl-asparagine modification	17	16.5049	0.0336766	[ALG11, ALG13, ALG3, ALG6, ALG9, B4GALT2, DPM2, DPM3, GNPNAT1, MANEA, MGAT3, MOGS, MVD, PGM3, PMM1, ST3GAL4, ST6GAL1]
GO:0018205	peptidyl-lysine modification	28	15.7303	0.0151022	[ATP7A, CTR9, DOHH, EIF5A2, HDAC6, HDAC9, KAT2B, KDM3A, LIF, MBD3, MBIP, MCRS1, NCOA3, OGT, RPS6KA5, RUVBL2, SETD8, SIRT2, SIRT5, SUPT3H, TADA3, TAF10, TAF12, TAF6L, TCF7L1, TET2, TGFB1, VCPKMT]
GO:0018209	peptidyl-serine modification	28	15.2174	0.0226805	[ADRBK1, AMH, AURKB, AXIN1, BAG4, BAX, BRAF, CREBL2, FNIP1, GALNT1, GAS6, GSK3B, HAX1, HIPK3, IL11, LIF, MAD2L2, MKNK1, MMAB, MORC3, PIK3CA, PINK1, PKD1, PLK1, RPS6KA5, TBK1, TGFB1, UHMK1]
GO:0018279	protein N-linked glycosylation via asparagine	17	16.6667	0.0309787	[ALG11, ALG13, ALG3, ALG6, ALG9, B4GALT2, DPM2, DPM3, GNPNAT1, MANEA, MGAT3, MOGS, MVD, PGM3, PMM1, ST3GAL4, ST6GAL1]
GO:0019219	regulation of nucleobase-containing compound metabolic process	533	13.6004	1.101688539635671E-14	[ABT1, ACD, ACVR1, ACVRL1, AGAP2, AGFG1, AGO2, AHRR, ALKBH4, AMH, ANKRD1, ANXA3, APOBEC3F, ARHGAP27, ARHGAP9, ARHGEF1, ARHGEF10L, ARHGEF16, ARHGEF17, ARHGEF19, ARHGEF4, ARHGEF6, ARNTL, ASF1B, ASXL3, ATF5, ATF6, ATXN1, AURKAIP1, AURKB, AXIN1, BAG4, BAX, BAZ2B, BBX, BCL10, BCL2L12, BCOR, BCORL1, BDP1, BEX1, BLOC1S2, BRMS1L, BRWD1, BTG2, C1orf85, C6orf1, CALCOCO1, CALCRL, CAMK4, CAMTA2, CAPN15, CARM…
GO:0019220	regulation of phosphate metabolic process	194	11.6867	0.0281841	[ACD, ACSL1, ACVR1, ACVRL1, ADCY2, ADCY3, ADCY5, ADCY9, AGAP2, AGFG1, AMH, ANXA2, ARHGAP27, ARHGAP9, ARHGEF1, ARHGEF10L, ARHGEF16, ARHGEF17, ARHGEF19, ARHGEF4, ARHGEF6, ARL6IP5, ATF6, ATP7A, ATXN1, AXIN1, BAG4, BAX, BCL10, BRAF, CALCRL, CARD10, CBS, CCDC88C, CCNE1, CCNT2, CDC25A, CDC25B, CDKL5, CDKN2C, CDKN2D, CHAMP1, CNKSR2, CNPPD1, COPS5, CPEB2, CREBL2, CXCR4, DBF4B, DDX11, DENND1A, DENND4A, DE…
GO:0019222	regulation of metabolic process	703	12.4227	3.819125916832926E-11	[ABT1, ACACA, ACD, ACER2, ACHE, ACSL1, ACVR1, ACVRL1, ADCY2, ADCY3, ADCY5, ADCY9, ADK, ADRBK1, AGAP2, AGFG1, AGO2, AHRR, AIFM2, AIMP2, ALKBH4, AMH, ANGPTL4, ANKRD1, ANXA2, ANXA3, APOBEC3F, ARHGAP27, ARHGAP9, ARHGDIB, ARHGEF1, ARHGEF10L, ARHGEF16, ARHGEF17, ARHGEF19, ARHGEF4, ARHGEF6, ARL6IP5, ARNTL, ASF1B, ASXL3, ATF5, ATF6, ATG14, ATP7A, ATXN1, AURKAIP1, AURKB, AXIN1, BAG4, BAX, BAZ2B, BBS2, BBX…
GO:0019438	aromatic compound biosynthetic process	528	13.105	1.5821279681329786E-11	[ABT1, ACACA, ACVR1, ACVRL1, ADCY2, ADCY3, ADCY9, ADK, AGAP2, AGO2, AHRR, AIFM2, ALKBH4, AMH, ANKRD1, ANXA3, ARHGEF10L, ARNTL, ASF1B, ASXL3, ATF5, ATF6, ATP5G1, ATP7A, ATXN1, AURKAIP1, AURKB, AXIN1, BAZ2B, BBX, BCL10, BCL2L12, BCOR, BCORL1, BDP1, BEX1, BLOC1S2, BRMS1L, BRWD1, C1orf85, C6orf1, CALCOCO1, CALCRL, CAMK4, CAMTA2, CAPN15, CARM1, CBX6, CCDC85B, CCNE1, CCNT2, CDCA7L, CDKN2D, CECR1, CENPB…
GO:0019538	protein metabolic process	484	11.1341	0.0177246	[AARS2, ACACA, ACD, ACER2, ACHE, ACSL1, ACVR1, ACVRL1, ADCY2, ADCY3, ADCY5, ADCY9, ADRBK1, AGAP2, AGO2, AHRR, AIFM2, AIMP1, AIMP2, ALG11, ALG13, ALG3, ALG6, ALG9, ALKBH4, AMH, ANXA2, ARNTL, ARSK, ATF6, ATG4A, ATP7A, AURKAIP1, AURKB, AXIN1, B3GALT1, B4GALNT1, B4GALT2, BAG4, BAX, BBS10, BCL10, BCL2L12, BCOR, BID, BLMH, BNIP3L, BOK, BRAF, BRMS1L, BTG2, C1RL, CAMK4, CAPN10, CAPN15, CARD10, CARD8, CAR…
GO:0019637	organophosphate metabolic process	192	12.4514	0.0023408	[ACACA, ACHE, ADCY2, ADCY3, ADCY9, ADK, AGAP2, AGFG1, AGPAT4, ARHGAP27, ARHGAP9, ARHGEF1, ARHGEF10L, ARHGEF16, ARHGEF17, ARHGEF19, ARHGEF4, ARHGEF6, ARL4C, ATP5G1, ATP6V1B2, AXIN1, CALCRL, CBS, CDKL5, CHD8, CHEK2, CLPX, COASY, CPEB2, CROT, DCTPP1, DDX11, DDX20, DDX54, DENND1A, DENND4A, DENND4B, DENND5B, DENND6B, DGKE, DHODH, DHX34, DIRAS1, DIS3, DNAJB6, DOCK4, DOCK5, DPM2, DPM3, DTYMK, DUT, EDN1,…
GO:0019692	deoxyribose phosphate metabolic process	7	21.2121	0.0474952	[ADK, DTYMK, DUT, GUK1, MUTYH, NT5C, SMUG1]
GO:0019693	ribose phosphate metabolic process	116	12.0083	0.0418197	[ACACA, ADCY2, ADK, AGAP2, AGFG1, ARHGAP27, ARHGAP9, ARHGEF1, ARHGEF10L, ARHGEF16, ARHGEF17, ARHGEF19, ARHGEF4, ARHGEF6, ARL4C, ATP5G1, ATP6V1B2, AXIN1, CALCRL, CBS, CDKL5, CHD8, CLPX, COASY, CPEB2, CROT, DDX11, DDX20, DDX54, DENND1A, DENND4A, DENND4B, DENND5B, DENND6B, DHODH, DIRAS1, DIS3, DOCK4, DOCK5, EDN1, EDNRB, EIF2B1, ELMOD2, EPHB3, ERCC2, FBXO8, FGD4, FNIP1, GIT1, GNAL, GNAQ, GNB3, GNG3, …
GO:0019720	Mo-molybdopterin cofactor metabolic process	3	42.8571	0.0277423	[MOCS1, MOCS3, NFS1]
GO:0022402	cell cycle process	161	13.3058	3.055034814828683E-4	[ACVR1, ALKBH4, AMH, ANAPC15, ANXA11, AURKAIP1, AURKB, BECN1, BID, BORA, CCNE1, CCNF, CCNG2, CDC14B, CDC25A, CDC25B, CDCA3, CDCA8, CDKN2C, CDKN2D, CECR2, CENPA, CENPT, CENPV, CEP55, CEP70, CETN3, CHAMP1, CHEK2, CIT, COASY, CRADD, CRLF3, CSNK1A1, CSNK2A2, DAPK3, DDX11, E2F4, E2F8, E4F1, EDN1, EMD, ERCC2, ESPL1, FAM175A, FAM83D, FBXO31, FBXW5, FBXW7, FGFR2, FMN2, FOXO4, GAS1, GAS2L1, GAS2L3, GAS6, …
GO:0030091	protein repair	3	60	0.00928406	[MSRA, MSRB2, MSRB3]
GO:0030811	regulation of nucleotide catabolic process	53	13.1841	0.0356495	[AGAP2, AGFG1, ARHGAP27, ARHGAP9, ARHGEF1, ARHGEF10L, ARHGEF16, ARHGEF17, ARHGEF19, ARHGEF4, ARHGEF6, AXIN1, CDKL5, CPEB2, DENND1A, DENND4A, DENND4B, DENND5B, DENND6B, DIS3, DNAJB6, DOCK4, DOCK5, EIF2B1, ELMOD2, EPHB3, FBXO8, FGD4, FNIP1, GIT1, GNAQ, GSK3B, IQSEC2, LAMTOR2, MLST8, PGAM5, RALGAPA2, RANGAP1, RANGRF, RAP1B, RAPGEF1, RCC1, RGS19, RHOG, RP2, SCRIB, SIPA1, SYDE1, TBC1D10B, TBCD, TMEM64…
GO:0030852	regulation of granulocyte differentiation	5	33.3333	0.0142879	[HAX1, INPP5D, KMT2E, OGT, ZBTB46]
GO:0031023	microtubule organizing center organization	14	16.6667	0.0471961	[CCNF, CEP68, CETN3, CROCC, FBXW5, HAUS2, NUBP1, NUBP2, OFD1, PLK1, SAC3D1, TMEM67, UXT, XRCC3]
GO:0031055	chromatin remodeling at centromere	7	21.875	0.0409208	[CENPA, CENPP, CENPQ, CENPV, HELLS, OIP5, RSF1]
GO:0031063	regulation of histone deacetylation	5	25	0.0479426	[NCOR1, SREBF1, TADA3, TGFB1, TRPS1]
GO:0031146	SCF-dependent proteasomal ubiquitin-dependent protein catabolic process	7	38.8889	0.00138286	[CCNF, FBXL3, FBXO31, FBXO9, FBXW5, FBXW7, FBXW9]
GO:0031163	metallo-sulfur cluster assembly	7	46.6667	3.691423981022593E-4	[ISCA1, NARFL, NDOR1, NFS1, NFU1, NUBP1, NUBP2]
GO:0031323	regulation of cellular metabolic process	645	12.652	1.6734454700918706E-11	[ABT1, ACACA, ACD, ACER2, ACHE, ACSL1, ACVR1, ACVRL1, ADCY2, ADCY3, ADCY5, ADCY9, AGAP2, AGFG1, AGO2, AHRR, AIFM2, AIMP2, ALKBH4, AMH, ANKRD1, ANXA2, ANXA3, APOBEC3F, ARHGAP27, ARHGAP9, ARHGEF1, ARHGEF10L, ARHGEF16, ARHGEF17, ARHGEF19, ARHGEF4, ARHGEF6, ARL6IP5, ARNTL, ASF1B, ASXL3, ATF5, ATF6, ATG14, ATP7A, ATXN1, AURKAIP1, AURKB, AXIN1, BAG4, BAX, BAZ2B, BBX, BCL10, BCL2L12, BCOR, BCORL1, BDP1,…
GO:0031326	regulation of cellular biosynthetic process	502	13.4946	4.716130512339256E-13	[ABT1, ACD, ACER2, ACVR1, ACVRL1, AGAP2, AGO2, AHRR, AIFM2, ALKBH4, AMH, ANKRD1, ANXA3, ARHGEF10L, ARNTL, ASF1B, ASXL3, ATF5, ATF6, ATXN1, AURKAIP1, AURKB, AXIN1, BAZ2B, BBX, BCL10, BCL2L12, BCOR, BCORL1, BDP1, BEX1, BLOC1S2, BRMS1L, BRWD1, BTG2, C1orf85, C6orf1, CALCOCO1, CALCRL, CAMK4, CAMTA2, CAPN15, CARM1, CBX6, CCDC85B, CCNE1, CCNT2, CDCA7L, CENPB, CHD2, CHD6, CHD8, CHEK2, CIR1, CIRBP, CLU, …
GO:0031327	negative regulation of cellular biosynthetic process	142	12.4561	0.00839249	[ACD, ACER2, ACVRL1, AGO2, AHRR, AIFM2, ANKRD1, ATXN1, AURKB, AXIN1, BCOR, BRMS1L, BTG2, CBX6, CCDC85B, CHD8, CHEK2, CIR1, CPEB2, CTR9, CUX2, DAP, DAPK3, DDX20, DEDD, DNAJB6, DNPEP, E2F8, E4F1, EDN1, EDNRB, EIF2B1, EZH1, FBXW7, FGFR2, FNIP1, GAS6, GATAD2A, GLIS3, GPS2, GRB10, GSK3B, HBEGF, HCFC2, HDAC5, HDAC6, HDAC9, HELLS, HEXIM1, HUS1, IFI16, IGBP1, INPP5D, INSIG2, IRF7, KDM5B, KLF11, LMCD1, MA…
GO:0031329	regulation of cellular catabolic process	92	13.9183	0.00158071	[AGAP2, AGFG1, AGO2, ARHGAP27, ARHGAP9, ARHGEF1, ARHGEF10L, ARHGEF16, ARHGEF17, ARHGEF19, ARHGEF4, ARHGEF6, ATG14, AXIN1, BAX, BECN1, BTG2, C12orf5, CDKL5, CLU, CPEB2, DAP, DAPK3, DENND1A, DENND4A, DENND4B, DENND5B, DENND6B, DHX34, DIS3, DNAJB6, DNPEP, DOCK4, DOCK5, DVL1, EIF2B1, ELMOD2, EPHB3, FBXO22, FBXO8, FBXW7, FGD4, FNIP1, GIPC1, GIT1, GLMN, GNAQ, GSK3B, IER3, IFI16, IFT88, IQSEC2, IRS2, KI…
GO:0031573	intra-S DNA damage checkpoint	4	40	0.0141286	[CHEK2, MDC1, RAD9A, TIPIN]
GO:0031647	regulation of protein stability	22	16.6667	0.0156751	[CCDC88C, CHEK2, CLU, COG3, CREBL2, CRTAP, DPM2, DPM3, FBXW7, GIPC1, GNAQ, MORC3, MYLIP, PEX6, PLK1, RASSF1, TADA3, TCF7L1, TNIP2, TRIM21, USP19, ZSWIM7]
GO:0031669	cellular response to nutrient levels	22	16.2963	0.0199618	[ATG14, BECN1, C12orf5, CPEB4, DAP, DNPEP, FBXO22, FNIP1, GAS2L1, GAS6, HDAC6, IFI16, IFT88, MYBBP1A, NBR1, PCSK9, RAB33B, SCOC, SREBF1, TNNC1, TP53INP2, UPP1]
GO:0032202	telomere assembly	3	60	0.00928406	[ACD, POT1, WRAP53]
GO:0032204	regulation of telomere maintenance	4	28.5714	0.0482955	[ACD, MYC, PIF1, POT1]
GO:0032210	regulation of telomere maintenance via telomerase	3	37.5	0.0410436	[ACD, PIF1, POT1]
GO:0032211	negative regulation of telomere maintenance via telomerase	3	50	0.0171527	[ACD, PIF1, POT1]
GO:0032261	purine nucleotide salvage	3	37.5	0.0410436	[ADK, HPRT1, PRTFDC1]
GO:0032324	molybdopterin cofactor biosynthetic process	3	42.8571	0.0277423	[MOCS1, MOCS3, NFS1]
GO:0032392	DNA geometric change	13	26	0.00128919	[CHD2, CHD8, DDX11, ERCC2, IGHMBP2, INO80, MCM6, PIF1, POT1, RAD51, RECQL4, RECQL5, RUVBL2]
GO:0032446	protein modification by small protein conjugation	78	12.3613	0.049485	[AHRR, AIMP2, AXIN1, BCL10, BCOR, BLMH, CCNF, CDC14B, CDCA3, CISH, CLU, CNOT4, CRBN, CTR9, CTU2, DTX2, DZIP3, E4F1, EGR2, ERCC8, FBXL3, FBXO22, FBXO3, FBXO31, FBXO33, FBXO9, FBXW5, FBXW7, GLMN, HDAC6, HECW1, HERC3, IRAK1, KLHL15, KLHL21, MAD2L2, MKRN3, MYLIP, NEURL1B, NEURL2, NSMCE1, NUB1, OGT, PELI3, PINK1, PLK1, RASSF1, RASSF3, RLIM, RNF13, RNF139, RNF144A, RNF167, RNF7, RUSC1, SENP6, SOCS3, SO…
GO:0032506	cytokinetic process	5	33.3333	0.0142879	[ALKBH4, ANXA11, AURKB, SPIRE2, UNC119]
GO:0032508	DNA duplex unwinding	13	27.0833	8.516866325058104E-4	[CHD2, CHD8, DDX11, ERCC2, IGHMBP2, INO80, MCM6, PIF1, POT1, RAD51, RECQL4, RECQL5, RUVBL2]
GO:0032570	response to progesterone	8	23.5294	0.0196854	[DSG2, JUNB, OXTR, RAMP2, SREBF1, TGFB1, TGFB3, TXNIP]
GO:0032774	RNA biosynthetic process	478	13.2557	4.6545925824627155E-11	[ABT1, ACVR1, ACVRL1, AGAP2, AGO2, AHRR, ALKBH4, AMH, ANKRD1, ANXA3, ARHGEF10L, ARNTL, ASF1B, ASXL3, ATF5, ATF6, ATXN1, AURKAIP1, AURKB, AXIN1, BAZ2B, BBX, BCL10, BCL2L12, BCOR, BCORL1, BDP1, BEX1, BLOC1S2, BRMS1L, BRWD1, C1orf85, C6orf1, CALCOCO1, CAMK4, CAMTA2, CAPN15, CARM1, CBX6, CCDC85B, CCNE1, CCNT2, CDCA7L, CENPB, CHD2, CHD6, CHD8, CHEK2, CIR1, CLU, CNOT8, COPS5, CPSF1, CREB3, CREBL2, CRLF…
GO:0032886	regulation of microtubule-based process	21	18.2609	0.0065248	[AURKB, BBS2, BORA, CCNF, CYLD, DIXDC1, GAS2L1, GSK3B, HDAC6, IGBP1, KATNB1, MID1IP1, NUBP1, NUBP2, PKD1, PSRC1, SENP6, SKA1, TBCD, TMEM67, XRCC3]
GO:0032922	circadian regulation of gene expression	6	25	0.0312893	[ADK, ARNTL, NCOR1, OGT, PGAP3, RORA]
GO:0033043	regulation of organelle organization	90	12.605	0.024184	[ACD, ANAPC15, ANXA2, ARHGEF10L, ARHGEF19, ARPC3, AURKAIP1, AURKB, BAG4, BAX, BCOR, BID, BORA, CAMSAP2, CCNF, CENPV, CIT, CORO1B, CTR9, CYLD, DAPK3, DHODH, DIXDC1, EDN1, ESPL1, FGFR2, FMN2, GAS2L1, GSK3B, HAX1, HDAC6, IER3, IFT88, KANK1, KATNB1, KDM3A, LIF, MAD2L2, MAP9, MED12, MID1IP1, MLST8, MOAP1, MYC, NCOR1, NOX4, NUBP1, NUBP2, OGT, PDE3A, PIF1, PINK1, PKD1, PKMYT1, PLA2G6, PLK1, POT1, PPM1E,…
GO:0033044	regulation of chromosome organization	20	15.625	0.0381063	[ACD, BCOR, CENPV, CTR9, ESPL1, KDM3A, LIF, MYC, NCOR1, OGT, PIF1, POT1, RB1, RECQL4, RPS6KA5, SENP6, SREBF1, TADA3, TGFB1, TRPS1]
GO:0033121	regulation of purine nucleotide catabolic process	53	13.217	0.0342575	[AGAP2, AGFG1, ARHGAP27, ARHGAP9, ARHGEF1, ARHGEF10L, ARHGEF16, ARHGEF17, ARHGEF19, ARHGEF4, ARHGEF6, AXIN1, CDKL5, CPEB2, DENND1A, DENND4A, DENND4B, DENND5B, DENND6B, DIS3, DNAJB6, DOCK4, DOCK5, EIF2B1, ELMOD2, EPHB3, FBXO8, FGD4, FNIP1, GIT1, GNAQ, GSK3B, IQSEC2, LAMTOR2, MLST8, PGAM5, RALGAPA2, RANGAP1, RANGRF, RAP1B, RAPGEF1, RCC1, RGS19, RHOG, RP2, SCRIB, SIPA1, SYDE1, TBC1D10B, TBCD, TMEM64…
GO:0033124	regulation of GTP catabolic process	49	13.4615	0.0305788	[AGAP2, AGFG1, ARHGAP27, ARHGAP9, ARHGEF1, ARHGEF10L, ARHGEF16, ARHGEF17, ARHGEF19, ARHGEF4, ARHGEF6, AXIN1, CDKL5, CPEB2, DENND1A, DENND4A, DENND4B, DENND5B, DENND6B, DIS3, DOCK4, DOCK5, EIF2B1, ELMOD2, EPHB3, FBXO8, FGD4, FNIP1, GIT1, GNAQ, GSK3B, IQSEC2, LAMTOR2, MLST8, PGAM5, RALGAPA2, RANGAP1, RANGRF, RAP1B, RAPGEF1, RCC1, RGS19, RHOG, RP2, SCRIB, SIPA1, SYDE1, TBC1D10B, TBCD]
GO:0033135	regulation of peptidyl-serine phosphorylation	16	17.0213	0.0299227	[AMH, AXIN1, BAG4, BAX, BRAF, CREBL2, FNIP1, GAS6, GSK3B, HAX1, IL11, LIF, MAD2L2, PIK3CA, TBK1, TGFB1]
GO:0033138	positive regulation of peptidyl-serine phosphorylation	15	19.7368	0.00981228	[AMH, AXIN1, BAG4, BRAF, CREBL2, FNIP1, GAS6, GSK3B, HAX1, IL11, LIF, MAD2L2, PIK3CA, TBK1, TGFB1]
GO:0033194	response to hydroperoxide	4	30.7692	0.0374658	[CLU, JAK2, MGST1, OXR1]
GO:0033206	meiotic cytokinesis	3	50	0.0171527	[FMN2, PLK1, SPIRE2]
GO:0033554	cellular response to stress	178	12.2337	0.00689746	[ACD, ALKBH8, AMH, ANKRD1, AP5Z1, ARHGEF10L, ARHGEF6, ARL6IP5, ARNTL, ATF6, ATG14, ATP7A, AXIN1, BAX, BECN1, BID, BOK, BTG2, C12orf5, CBS, CDC14B, CDKN2D, CHD2, CHEK2, CLU, COPS5, CPEB2, CPEB4, CRADD, CREB3, DAP, DDX11, DIXDC1, DNPEP, EDN1, EIF2B1, ERCC2, ERCC8, FAM129A, FAM175A, FANCE, FANCF, FAS, FBXO22, FBXO31, FBXW7, FMN2, FNIP1, FOXO4, GAS2L1, GAS6, GPS2, GSK3B, GTSE1, HAS2, HDAC6, HIF3A, HI…
GO:0033762	response to glucagon	10	20.4082	0.0255705	[ADCY2, ADCY3, ADCY5, ADCY9, CDO1, CYC1, GNB3, GNG3, QDPR, SREBF1]
GO:0033866	nucleoside bisphosphate biosynthetic process	5	29.4118	0.0247581	[ACACA, COASY, PPCDC, SLC35B2, SLC35B3]
GO:0034030	ribonucleoside bisphosphate biosynthetic process	5	29.4118	0.0247581	[ACACA, COASY, PPCDC, SLC35B2, SLC35B3]
GO:0034033	purine nucleoside bisphosphate biosynthetic process	5	29.4118	0.0247581	[ACACA, COASY, PPCDC, SLC35B2, SLC35B3]
GO:0034244	negative regulation of transcription elongation from RNA polymerase II promoter	3	37.5	0.0410436	[AXIN1, RECQL5, SUPT4H1]
GO:0034349	glial cell apoptotic process	4	28.5714	0.0482955	[BID, GAS6, PRKCI, RB1]
GO:0034470	ncRNA processing	32	14.0969	0.0412712	[ADAT3, AGO2, ALKBH8, CTU2, DIS3, EMG1, FBLL1, FDXACB1, HEXIM1, INTS12, INTS6, KRR1, MOCS3, NOC4L, NOL6, NOP14, PUS1, PUSL1, RRP9, SUV39H1, TBL3, TPRKB, TRMT13, TRMT44, TRPT1, TRUB1, TRUB2, TSEN34, TSEN54, TSR3, USB1, UTP14A]
GO:0034502	protein localization to chromosome	7	25.9259	0.0169384	[ACD, AURKB, CENPA, CHAMP1, LRWD1, PLK1, RB1]
GO:0034508	centromere complex assembly	11	25	0.00414455	[CENPA, CENPP, CENPQ, CENPT, CENPV, HELLS, OIP5, POGZ, RB1, RSF1, SENP6]
GO:0034641	cellular nitrogen compound metabolic process	780	12.3928	1.095486338555247E-12	[AARS2, AASDHPPT, ABCG2, ABT1, ACACA, ACD, ACER2, ACHE, ACVR1, ACVRL1, ADAT3, ADCY2, ADCY3, ADCY9, ADK, AGAP2, AGFG1, AGGF1, AGO2, AHRR, AIFM2, AIMP1, AIMP2, ALDH18A1, ALDH4A1, ALKBH4, ALKBH8, AMH, ANKRD1, ANXA3, AP5Z1, APOBEC3F, ARHGAP27, ARHGAP9, ARHGEF1, ARHGEF10L, ARHGEF16, ARHGEF17, ARHGEF19, ARHGEF4, ARHGEF6, ARL4C, ARNTL, ASF1B, ASXL3, ATF5, ATF6, ATP5G1, ATP6V1B2, ATP7A, ATXN1, AURKAIP1, …
GO:0034644	cellular response to UV	10	21.2766	0.0194281	[AURKB, BAX, CDC25A, FBXW7, INO80, MMAB, MYC, RHNO1, RUVBL2, USP28]
GO:0034645	cellular macromolecule biosynthetic process	597	13.1007	2.2545979805349336E-13	[AARS2, ABT1, ACD, ACER2, ACHE, ACVR1, ACVRL1, AGAP2, AGO2, AHRR, AIFM2, AIMP1, AIMP2, ALG11, ALG13, ALG3, ALG6, ALG9, ALKBH4, AMH, ANKRD1, ANXA3, ARHGEF10L, ARNTL, ASF1B, ASXL3, ATF5, ATF6, ATP7A, ATXN1, AURKB, AXIN1, B3GALT1, B4GALNT1, B4GALT2, BAZ2B, BBX, BCL10, BCL2L12, BCOR, BCORL1, BDP1, BEX1, BLOC1S2, BRMS1L, BRWD1, BTG2, C1orf85, C6orf1, CALCOCO1, CAMK4, CAMTA2, CAPN15, CARM1, CARS2, CBX6…
GO:0034654	nucleobase-containing compound biosynthetic process	518	13.1206	2.3306189485224624E-11	[ABT1, ACACA, ACVR1, ACVRL1, ADCY2, ADCY3, ADCY9, ADK, AGAP2, AGO2, AHRR, ALKBH4, AMH, ANKRD1, ANXA3, ARHGEF10L, ARNTL, ASF1B, ASXL3, ATF5, ATF6, ATP5G1, ATXN1, AURKAIP1, AURKB, AXIN1, BAZ2B, BBX, BCL10, BCL2L12, BCOR, BCORL1, BDP1, BEX1, BLOC1S2, BRMS1L, BRWD1, C1orf85, C6orf1, CALCOCO1, CALCRL, CAMK4, CAMTA2, CAPN15, CARM1, CBX6, CCDC85B, CCNE1, CCNT2, CDCA7L, CDKN2D, CECR1, CENPB, CHD2, CHD6, …
GO:0034766	negative regulation of ion transmembrane transport	4	28.5714	0.0482955	[CRBN, IRS2, KCNH2, SLC30A1]
GO:0034983	peptidyl-lysine deacetylation	3	42.8571	0.0277423	[HDAC6, HDAC9, SIRT2]
GO:0035268	protein mannosylation	3	60	0.00928406	[DPM2, DPM3, SDF2]
GO:0035269	protein O-linked mannosylation	3	60	0.00928406	[DPM2, DPM3, SDF2]
GO:0035372	protein localization to microtubule	3	37.5	0.0410436	[CHAMP1, DVL1, GSK3B]
GO:0035601	protein deacylation	14	23.7288	0.00220487	[BRMS1L, HDAC5, HDAC6, HDAC9, LYPLAL1, NCOR1, REST, SIRT2, SIRT5, SMARCAD1, SREBF1, TADA3, TGFB1, TRPS1]
GO:0035690	cellular response to drug	11	20	0.0227431	[ACER2, ANKRD1, COASY, GAS6, KCNH2, MYC, NME1, PPM1E, PPP3CB, QDPR, REST]
GO:0036211	protein modification process	344	12.1598	2.228692106954413E-4	[ACD, ACER2, ACSL1, ACVR1, ACVRL1, ADCY2, ADCY3, ADCY5, ADCY9, ADRBK1, AHRR, AIMP2, ALG11, ALG13, ALG3, ALG6, ALG9, ALKBH4, AMH, ANXA2, ARSK, ATF6, ATP7A, AURKB, AXIN1, B3GALT1, B4GALNT1, B4GALT2, BAG4, BAX, BCL10, BCOR, BLMH, BRAF, BRMS1L, BTG2, CAMK4, CARD10, CARM1, CBS, CCDC88C, CCNE1, CCNF, CCNT2, CDC14B, CDC25A, CDC25B, CDCA3, CDK17, CDKL5, CDKN2C, CDKN2D, CHAMP1, CHEK2, CHM, CHML, CISH, CLU…
GO:0040038	polar body extrusion after meiotic divisions	3	75	0.00402195	[FMN2, PLK1, SPIRE2]
GO:0042147	retrograde transport, endosome to Golgi	8	20	0.0482428	[BET1L, FAM21B, FAM21C, SNX8, TMED9, VTI1A, WASH1, WASH2P]
GO:0042158	lipoprotein biosynthetic process	13	17.3333	0.0415433	[DPM2, DPM3, GPAA1, PGAP2, PGAP3, PIGK, PIGZ, PLAUR, ZDHHC15, ZDHHC17, ZDHHC20, ZDHHC22, ZDHHC8]
GO:0042176	regulation of protein catabolic process	28	14.7368	0.0329464	[AGAP2, ARNTL, AXIN1, CHEK2, CLU, CSNK2A2, CSNK2A3, DEDD, DVL1, FBXO22, FBXW7, FMN2, GIPC1, GLMN, GSK3B, HGS, IER3, MAD2L2, MYLIP, NUB1, PCSK9, PKD1, PLK1, RAD23A, SGSM3, SH3D19, TNFAIP3, TRIB1]
GO:0042278	purine nucleoside metabolic process	102	12.8463	0.0104653	[ACACA, ADK, AGAP2, AGFG1, ARHGAP27, ARHGAP9, ARHGEF1, ARHGEF10L, ARHGEF16, ARHGEF17, ARHGEF19, ARHGEF4, ARHGEF6, ARL4C, ATP5G1, ATP6V1B2, AXIN1, CDKL5, CECR1, CHD8, CLPX, COASY, CPEB2, CROT, DDX11, DDX20, DDX54, DENND1A, DENND4A, DENND4B, DENND5B, DENND6B, DIRAS1, DIS3, DOCK4, DOCK5, EIF2B1, ELMOD2, EPHB3, ERCC2, FBXO8, FGD4, FNIP1, GIT1, GNAQ, GNB3, GNG3, GSK3B, GUK1, HPRT1, IGHMBP2, IMPDH1, IN…
GO:0042364	water-soluble vitamin biosynthetic process	5	55.5556	0.00101497	[AKR1A1, MMAA, MMAB, PNPO, RFK]
GO:0042451	purine nucleoside biosynthetic process	16	16	0.0492357	[ACACA, ADK, ATP5G1, CECR1, COASY, GUK1, HPRT1, IMPDH1, NME1, PPCDC, PRPS2, PRTFDC1, RP2, SLC35B2, SLC35B3, TGFB1]
GO:0042454	ribonucleoside catabolic process	86	12.6657	0.0243738	[AGAP2, AGFG1, APOBEC3F, ARHGAP27, ARHGAP9, ARHGEF1, ARHGEF10L, ARHGEF16, ARHGEF17, ARHGEF19, ARHGEF4, ARHGEF6, ARL4C, AXIN1, CDKL5, CECR1, CHD8, CLPX, CPEB2, DDX11, DDX20, DDX54, DENND1A, DENND4A, DENND4B, DENND5B, DENND6B, DIRAS1, DIS3, DOCK4, DOCK5, EIF2B1, ELMOD2, EPHB3, ERCC2, FBXO8, FGD4, FNIP1, GIT1, GNAQ, GNB3, GNG3, GSK3B, HPRT1, IGHMBP2, INO80, IQSEC2, KATNB1, LAMTOR2, MED12, MLST8, NCO…
GO:0042455	ribonucleoside biosynthetic process	19	16.2393	0.0300207	[ACACA, ADK, ATP5G1, CECR1, COASY, DHODH, GUK1, HPRT1, IMPDH1, NME1, PPCDC, PRPS2, PRTFDC1, RP2, SLC35B2, SLC35B3, TGFB1, UCK1, UPP1]
GO:0042559	pteridine-containing compound biosynthetic process	6	31.5789	0.00983509	[MTHFD1, MTHFD1L, MTHFSD, PCBD1, PCBD2, QDPR]
GO:0042594	response to starvation	22	15.942	0.0251088	[ATG14, BECN1, C12orf5, CPEB4, DAP, DHODH, DNPEP, FBXO22, FNIP1, GAS2L1, GAS6, HDAC6, IFI16, IFT88, MYBBP1A, NBR1, PCSK9, RAB33B, SCOC, SREBF1, TP53INP2, UPP1]
GO:0043087	regulation of GTPase activity	49	13.4986	0.029287	[AGAP2, AGFG1, ARHGAP27, ARHGAP9, ARHGEF1, ARHGEF10L, ARHGEF16, ARHGEF17, ARHGEF19, ARHGEF4, ARHGEF6, AXIN1, CDKL5, CPEB2, DENND1A, DENND4A, DENND4B, DENND5B, DENND6B, DIS3, DOCK4, DOCK5, EIF2B1, ELMOD2, EPHB3, FBXO8, FGD4, FNIP1, GIT1, GNAQ, GSK3B, IQSEC2, LAMTOR2, MLST8, PGAM5, RALGAPA2, RANGAP1, RANGRF, RAP1B, RAPGEF1, RCC1, RGS19, RHOG, RP2, SCRIB, SIPA1, SYDE1, TBC1D10B, TBCD]
GO:0043094	cellular metabolic compound salvage	9	23.6842	0.0131588	[ADK, CECR1, EIF2B1, HPRT1, NAPRT1, PRTFDC1, TK1, UCK1, UPP1]
GO:0043096	purine nucleobase salvage	3	50	0.0171527	[CECR1, HPRT1, PRTFDC1]
GO:0043162	ubiquitin-dependent protein catabolic process via the multivesicular body sorting pathway	4	33.3333	0.028181	[HDAC6, PTPN23, TOM1L1, VPS28]
GO:0043170	macromolecule metabolic process	949	11.8094	6.709820534967156E-11	[AARS2, AASDHPPT, ABCC5, ABT1, ACACA, ACD, ACER2, ACHE, ACSL1, ACVR1, ACVRL1, ADAM15, ADAT3, ADCY2, ADCY3, ADCY5, ADCY9, ADK, ADRBK1, AGAP2, AGFG1, AGGF1, AGO2, AHRR, AIFM2, AIMP1, AIMP2, ALG11, ALG13, ALG3, ALG6, ALG9, ALKBH4, ALKBH8, AMH, ANKRD1, ANXA2, ANXA3, AP5Z1, APOBEC3F, ARHGEF10L, ARNTL, ARSK, ASF1B, ASXL3, ATF5, ATF6, ATG4A, ATP7A, ATXN1, AURKAIP1, AURKB, AXIN1, B3GALT1, B4GALNT1, B4GAL…
GO:0043173	nucleotide salvage	6	42.8571	0.00170731	[ADK, HPRT1, NAPRT1, PRTFDC1, UCK1, UPP1]
GO:0043174	nucleoside salvage	6	42.8571	0.00170731	[ADK, HPRT1, PRTFDC1, TK1, UCK1, UPP1]
GO:0043280	positive regulation of cysteine-type endopeptidase activity involved in apoptotic process	19	16.3793	0.027724	[ACER2, ARL6IP5, BAX, BCL10, BID, BOK, CARD8, CRADD, DAP, DNPEP, FADD, FAS, JAK2, MYC, NGFRAP1, NLRP2, PRELID1, REST, RPS27L]
GO:0043392	negative regulation of DNA binding	9	22.5	0.0183247	[IFI16, JAK2, LHX2, MAD2L2, NFIB, RSF1, SP100, ZFP90, ZNF675]
GO:0043412	macromolecule modification	358	12.1976	1.2335113418369134E-4	[ACD, ACER2, ACSL1, ACVR1, ACVRL1, ADCY2, ADCY3, ADCY5, ADCY9, ADRBK1, AHRR, AIMP2, ALG11, ALG13, ALG3, ALG6, ALG9, ALKBH4, ALKBH8, AMH, ANXA2, APOBEC3F, ARSK, ATF6, ATP7A, AURKB, AXIN1, B3GALT1, B4GALNT1, B4GALT2, BAG4, BAX, BCL10, BCOR, BLMH, BRAF, BRMS1L, BTG2, CAMK4, CARD10, CARM1, CBS, CCDC88C, CCNE1, CCNF, CCNT2, CDC14B, CDC25A, CDC25B, CDCA3, CDK17, CDKL5, CDKN2C, CDKN2D, CHAMP1, CHEK2, CH…
GO:0043413	macromolecule glycosylation	40	14.1343	0.0239795	[ACER2, ALG11, ALG13, ALG3, ALG6, ALG9, B3GALT1, B4GALNT1, B4GALT2, COG3, DPM2, DPM3, EOGT, GALNT1, GALNT16, GALNT7, GCNT2, GCNT4, GNPNAT1, KAT2B, MANEA, MGAT3, MOGS, MVD, NAGPA, OGT, PARP16, PGM3, PMM1, POGLUT1, SDF2, SIRT2, SIRT5, ST3GAL3, ST3GAL4, ST6GAL1, ST6GALNAC4, ST8SIA1, TET2, TMEM59]
GO:0043414	macromolecule methylation	25	15.8228	0.0194577	[ALKBH8, BCOR, BTG2, CARM1, CTR9, DPY30, EMG1, GATAD2A, GSK3B, HELLS, KDM1B, KDM3A, KMT2E, METTL14, METTL3, OGT, PIK3CA, PRMT2, RNMT, SATB1, SETD8, SETDB2, TET2, TRMT112, VCPKMT]
GO:0043434	response to peptide hormone	53	12.9902	0.0449413	[ADCY2, ADCY3, ADCY5, ADCY9, ATP6V0E2, ATP6V1B2, ATP6V1C1, ATP6V1G1, BRAF, BTG2, CAPN10, CDO1, CISH, COASY, CPEB2, CYC1, EEF2K, EGR2, EIF2B1, FABP3, FGFR2, FOXO4, FRS2, GNAI1, GNB3, GNG3, GRB10, HDAC5, HDAC9, INSIG2, IRS2, JAK2, JUNB, KANK1, KAT2B, MBD5, MLST8, MTUS1, OGT, OXTR, PCSK9, PIK3C2A, PIK3CA, PRKAB2, PRKCI, QDPR, RAB8A, RARRES2, SOCS3, SOCS4, SREBF1, STRADA, TRIB3]
GO:0043545	molybdopterin cofactor metabolic process	3	42.8571	0.0277423	[MOCS1, MOCS3, NFS1]
GO:0043574	peroxisomal transport	6	30	0.0128494	[PEX1, PEX10, PEX13, PEX6, PEX7, ZNF260]
GO:0043654	recognition of apoptotic cell	3	75	0.00402195	[MEGF10, PEAR1, SCARB1]
GO:0043687	post-translational protein modification	34	15.1111	0.0144436	[ALG11, ALG13, ALG3, ALG6, ALG9, ARSK, B4GALT2, CRTAP, DOHH, DPM2, DPM3, EIF5A2, ESCO1, GALNT1, GALNT7, GAS6, GCNT4, GNPNAT1, GPAA1, MANEA, MGAT3, MOGS, MVD, PGM3, PIGK, PLAUR, PMM1, ST3GAL3, ST3GAL4, ST6GAL1, ST6GALNAC4, STS, SUMF1, SUMO3]
GO:0044249	cellular biosynthetic process	708	12.7499	7.494708171669862E-14	[AARS2, AASDHPPT, ABT1, ACACA, ACD, ACER2, ACHE, ACSL1, ACSS2, ACVR1, ACVRL1, ADCY2, ADCY3, ADCY9, ADK, AGAP2, AGO2, AGPAT4, AHRR, AIFM2, AIMP1, AIMP2, AKR1A1, ALDH18A1, ALDH4A1, ALG11, ALG13, ALG3, ALG6, ALG9, ALKBH4, AMH, ANKRD1, ANXA3, ARHGEF10L, ARNTL, ASF1B, ASXL3, ATF5, ATF6, ATP5G1, ATP7A, ATXN1, AURKAIP1, AURKB, AXIN1, B3GALT1, B4GALNT1, B4GALT2, BAZ2B, BBX, BCAT2, BCL10, BCL2L12, BCOR, B…
GO:0044260	cellular macromolecule metabolic process	900	12.285	8.056978776619984E-15	[AARS2, ABT1, ACD, ACER2, ACHE, ACSL1, ACVR1, ACVRL1, ADAT3, ADCY2, ADCY3, ADCY5, ADCY9, ADRBK1, AGAP2, AGGF1, AGO2, AHRR, AIFM2, AIMP1, AIMP2, ALG11, ALG13, ALG3, ALG6, ALG9, ALKBH4, ALKBH8, AMH, ANKRD1, ANXA2, ANXA3, AP5Z1, APOBEC3F, ARHGEF10L, ARNTL, ARSK, ASF1B, ASXL3, ATF5, ATF6, ATP7A, ATXN1, AURKAIP1, AURKB, AXIN1, B3GALT1, B4GALNT1, B4GALT2, BAG4, BAX, BAZ2B, BBS10, BBX, BCL10, BCL2L12, B…
GO:0044267	cellular protein metabolic process	434	11.7807	4.440441523761365E-4	[AARS2, ACD, ACER2, ACSL1, ACVR1, ACVRL1, ADCY2, ADCY3, ADCY5, ADCY9, ADRBK1, AGO2, AHRR, AIFM2, AIMP1, AIMP2, ALG11, ALG13, ALG3, ALG6, ALG9, ALKBH4, AMH, ANXA2, ARNTL, ARSK, ATF6, ATP7A, AURKAIP1, AURKB, AXIN1, B3GALT1, B4GALNT1, B4GALT2, BAG4, BAX, BBS10, BCL10, BCOR, BLMH, BNIP3L, BRAF, BRMS1L, BTG2, CAMK4, CARD10, CARM1, CARS2, CBS, CCDC88C, CCNE1, CCNF, CCNT2, CDC14B, CDC25A, CDC25B, CDCA3,…
GO:0044271	cellular nitrogen compound biosynthetic process	537	13.1232	7.195591541788492E-12	[ABT1, ACACA, ACER2, ACVR1, ACVRL1, ADCY2, ADCY3, ADCY9, ADK, AGAP2, AGO2, AHRR, AIFM2, ALKBH4, AMH, ANKRD1, ANXA3, ARHGEF10L, ARNTL, ASF1B, ASXL3, ATF5, ATF6, ATP5G1, ATXN1, AURKAIP1, AURKB, AXIN1, BAZ2B, BBX, BCL10, BCL2L12, BCOR, BCORL1, BDH2, BDP1, BEX1, BLOC1S2, BRMS1L, BRWD1, C1orf85, C6orf1, CALCOCO1, CALCRL, CAMK4, CAMTA2, CAPN15, CARM1, CBX6, CCDC85B, CCNE1, CCNT2, CDCA7L, CDKN2D, CECR1,…
GO:0044743	intracellular protein transmembrane import	8	26.6667	0.00917288	[PEX1, PEX10, PEX13, PEX6, PEX7, SAMM50, TIMM22, ZNF260]
GO:0045655	regulation of monocyte differentiation	4	40	0.0141286	[INPP5D, IRF7, MYC, ZBTB46]
GO:0045656	negative regulation of monocyte differentiation	3	75	0.00402195	[INPP5D, MYC, ZBTB46]
GO:0045842	positive regulation of mitotic metaphase/anaphase transition	3	42.8571	0.0277423	[ESPL1, PLK1, RB1]
GO:0045892	negative regulation of transcription, DNA-templated	113	12.1767	0.0315507	[AHRR, ANKRD1, ATXN1, AURKB, BCOR, BRMS1L, CBX6, CCDC85B, CHD8, CIR1, CTR9, CUX2, DAP, DDX20, DEDD, DNAJB6, DNPEP, E2F8, E4F1, EDN1, EDNRB, EZH1, FGFR2, FNIP1, GAS6, GATAD2A, GLIS3, GPS2, HCFC2, HDAC5, HDAC6, HDAC9, HELLS, HEXIM1, IFI16, IGBP1, IRF7, KDM5B, KLF11, LMCD1, MAD2L2, MBD3, MED25, MOSPD1, MXD3, MYBBP1A, MYC, N4BP2L2, NCOR1, NFIB, NFIC, NR1D2, ORC2, PAWR, PBXIP1, PDCD4, PFDN5, PGAP3, PK…
GO:0045934	negative regulation of nucleobase-containing compound metabolic process	135	12.5815	0.00723943	[ACD, ACVRL1, AHRR, ANKRD1, APOBEC3F, ATXN1, AURKB, AXIN1, BAG4, BCOR, BRMS1L, CBX6, CCDC85B, CHD8, CHEK2, CIR1, CPEB2, CTR9, CUX2, DAP, DDX20, DEDD, DHX34, DNAJB6, DNPEP, E2F8, E4F1, EDN1, EDNRB, EZH1, FBXW7, FGFR2, FNIP1, GAS6, GATAD2A, GLIS3, GPS2, HCFC2, HDAC5, HDAC6, HDAC9, HELLS, HEXIM1, HUS1, IFI16, IGBP1, IRF7, KDM5B, KLF11, LMCD1, MAD2L2, MBD3, MED25, MMAB, MOSPD1, MXD3, MYBBP1A, MYC, N4…
GO:0045955	negative regulation of calcium ion-dependent exocytosis	3	42.8571	0.0277423	[REST, STXBP3, TRIM9]
GO:0046037	GMP metabolic process	4	40	0.0141286	[GUK1, HPRT1, IMPDH1, PRTFDC1]
GO:0046100	hypoxanthine metabolic process	3	42.8571	0.0277423	[CECR1, HPRT1, PRTFDC1]
GO:0046112	nucleobase biosynthetic process	5	26.3158	0.0391693	[CECR1, COASY, DHODH, HPRT1, PRTFDC1]
GO:0046128	purine ribonucleoside metabolic process	101	12.7686	0.0127115	[ACACA, ADK, AGAP2, AGFG1, ARHGAP27, ARHGAP9, ARHGEF1, ARHGEF10L, ARHGEF16, ARHGEF17, ARHGEF19, ARHGEF4, ARHGEF6, ARL4C, ATP5G1, ATP6V1B2, AXIN1, CDKL5, CECR1, CHD8, CLPX, COASY, CPEB2, CROT, DDX11, DDX20, DDX54, DENND1A, DENND4A, DENND4B, DENND5B, DENND6B, DIRAS1, DIS3, DOCK4, DOCK5, EIF2B1, ELMOD2, EPHB3, ERCC2, FBXO8, FGD4, FNIP1, GIT1, GNAQ, GNB3, GNG3, GSK3B, GUK1, HPRT1, IGHMBP2, IMPDH1, IN…
GO:0046129	purine ribonucleoside biosynthetic process	16	16	0.0492357	[ACACA, ADK, ATP5G1, CECR1, COASY, GUK1, HPRT1, IMPDH1, NME1, PPCDC, PRPS2, PRTFDC1, RP2, SLC35B2, SLC35B3, TGFB1]
GO:0046130	purine ribonucleoside catabolic process	85	12.6866	0.0242116	[AGAP2, AGFG1, ARHGAP27, ARHGAP9, ARHGEF1, ARHGEF10L, ARHGEF16, ARHGEF17, ARHGEF19, ARHGEF4, ARHGEF6, ARL4C, AXIN1, CDKL5, CECR1, CHD8, CLPX, CPEB2, DDX11, DDX20, DDX54, DENND1A, DENND4A, DENND4B, DENND5B, DENND6B, DIRAS1, DIS3, DOCK4, DOCK5, EIF2B1, ELMOD2, EPHB3, ERCC2, FBXO8, FGD4, FNIP1, GIT1, GNAQ, GNB3, GNG3, GSK3B, HPRT1, IGHMBP2, INO80, IQSEC2, KATNB1, LAMTOR2, MED12, MLST8, NCOA3, NUDT9,…
GO:0046146	tetrahydrobiopterin metabolic process	3	42.8571	0.0277423	[PCBD1, PCBD2, QDPR]
GO:0046385	deoxyribose phosphate biosynthetic process	4	44.4444	0.0092204	[ADK, DTYMK, DUT, GUK1]
GO:0046434	organophosphate catabolic process	100	12.4224	0.0260568	[AGAP2, AGFG1, ARHGAP27, ARHGAP9, ARHGEF1, ARHGEF10L, ARHGEF16, ARHGEF17, ARHGEF19, ARHGEF4, ARHGEF6, ARL4C, AXIN1, CDKL5, CHD8, CLPX, CPEB2, DCTPP1, DDX11, DDX20, DDX54, DENND1A, DENND4A, DENND4B, DENND5B, DENND6B, DIRAS1, DIS3, DNAJB6, DOCK4, DOCK5, EIF2B1, ELMOD2, EPHB3, ERCC2, FBXO8, FGD4, FNIP1, GIT1, GNAQ, GNB3, GNG3, GSK3B, HPRT1, IGHMBP2, IMPA2, INO80, INPP5E, IQSEC2, KATNB1, LAMTOR2, MED…
GO:0046467	membrane lipid biosynthetic process	17	17.1717	0.0238429	[ACER2, B4GALNT1, CERS6, DPM2, DPM3, ELOVL1, GPAA1, PGAP2, PGAP3, PIGK, PIGZ, PLA2G6, PLAUR, PPAP2A, SMPD1, ST8SIA1, UGCG]
GO:0046483	heterocycle metabolic process	759	12.5268	2.476880613061694E-13	[AARS2, ABCG2, ABT1, ACACA, ACD, ACHE, ACVR1, ACVRL1, ADAT3, ADCY2, ADCY3, ADCY9, ADK, AGAP2, AGFG1, AGGF1, AGO2, AHRR, AIFM2, AIMP1, AIMP2, ALDH18A1, ALDH4A1, ALKBH4, ALKBH8, AMH, ANKRD1, ANXA3, AP5Z1, APOBEC3F, ARHGAP27, ARHGAP9, ARHGEF1, ARHGEF10L, ARHGEF16, ARHGEF17, ARHGEF19, ARHGEF4, ARHGEF6, ARL4C, ARNTL, ASF1B, ASXL3, ATF5, ATF6, ATP5G1, ATP6V1B2, ATP7A, ATXN1, AURKAIP1, AURKB, AXIN1, BAG…
GO:0046697	decidualization	5	26.3158	0.0391693	[DEDD, JUNB, LIF, PPARD, STC1]
GO:0046825	regulation of protein export from nucleus	7	25	0.0206304	[CAMK4, EMD, GAS6, GSK3B, RANGAP1, SP100, UHMK1]
GO:0046839	phospholipid dephosphorylation	6	26.087	0.0256349	[INPP5A, INPP5B, INPP5D, INPP5E, PPAP2A, SYNJ2]
GO:0046856	phosphatidylinositol dephosphorylation	5	27.7778	0.0314498	[INPP5A, INPP5B, INPP5D, INPP5E, SYNJ2]
GO:0048285	organelle fission	79	14.0569	0.00250999	[ANAPC15, AURKAIP1, AURKB, BAX, BORA, CCNF, CCNG2, CDC25A, CDC25B, CDCA3, CDCA8, CENPT, CENPV, CEP55, CETN3, CHAMP1, CHEK2, CIT, CSNK1A1, DAPK3, DDX11, DHODH, E4F1, EDN1, ERBB4, ESPL1, FAM83D, FBXW5, FGFR2, FMN2, GDAP1, HAUS2, HELLS, HFM1, HSF1, INO80, KATNB1, KIF18B, KIF22, KIF23, KLHL21, LIF, MAD2L2, MAP9, MAPRE3, MED12, MYBL2, NCAPH, NEK1, OFD1, OIP5, OSGIN2, PDE3A, PKMYT1, PLK1, POGZ, PSRC1, …
GO:0048318	axial mesoderm development	3	37.5	0.0410436	[AXIN1, EPB41L5, TCF7L1]
GO:0048319	axial mesoderm morphogenesis	3	60	0.00928406	[AXIN1, EPB41L5, TCF7L1]
GO:0048641	regulation of skeletal muscle tissue development	12	20.339	0.0156781	[ACVR1, ARNTL, BOC, FBXO22, HDAC5, HDAC9, MEGF10, NR1D2, TGFB1, UQCC2, USP19, YBX3]
GO:0048642	negative regulation of skeletal muscle tissue development	3	37.5	0.0410436	[TGFB1, USP19, YBX3]
GO:0050775	positive regulation of dendrite morphogenesis	5	29.4118	0.0247581	[CDKL5, CUX2, FBXW8, NUMBL, OBSL1]
GO:0050790	regulation of catalytic activity	211	11.4799	0.0424655	[ACD, ACER2, ACSL1, ADCY2, ADCY3, ADCY5, ADCY9, ADRBK1, AGAP2, AGFG1, AMH, ANGPTL4, ANXA2, ARHGAP27, ARHGAP9, ARHGDIB, ARHGEF1, ARHGEF10L, ARHGEF16, ARHGEF17, ARHGEF19, ARHGEF4, ARHGEF6, ARL6IP5, ATF6, ATP7A, AURKAIP1, AXIN1, BAG4, BAX, BCL10, BCL2L12, BID, BOK, BRAF, CAMK4, CARD10, CARD8, CBS, CCNE1, CCNT2, CDC14B, CDC25A, CDC25B, CDKL5, CDKN2C, CDKN2D, CLPX, CNPPD1, CPEB2, CRADD, CREB3, CSNK2A2…
GO:0050794	regulation of cellular process	976	11.1862	1.847162842097208E-5	[ABT1, ACACA, ACD, ACER2, ACHE, ACSL1, ACVR1, ACVRL1, ADAMTS1, ADCY2, ADCY3, ADCY5, ADCY9, ADK, ADRBK1, AFP, AGAP2, AGFG1, AGGF1, AGO2, AHRR, AIFM2, AIMP1, AIMP2, AKAP11, ALKBH4, AMH, ANAPC15, ANGPTL4, ANKRD1, ANXA2, ANXA3, APLNR, APOBEC3F, ARHGAP12, ARHGAP19, ARHGAP23, ARHGAP27, ARHGAP33, ARHGAP4, ARHGAP9, ARHGDIB, ARHGEF1, ARHGEF10L, ARHGEF16, ARHGEF17, ARHGEF19, ARHGEF39, ARHGEF4, ARHGEF6, ARL…
GO:0051053	negative regulation of DNA metabolic process	14	18.1818	0.0243889	[ACD, ACVRL1, ANKRD1, CHEK2, FBXW7, HUS1, MMAB, PIF1, POT1, PRELID1, STAG2, TGFB1, TGFB3, TIPIN]
GO:0051098	regulation of binding	31	14.7619	0.0253668	[ACD, ANXA2, AURKB, BAX, CARM1, CRBN, DVL1, EPB41L5, ERCC2, GSK3B, HDAC5, IFI16, ITGA4, JAK2, LHX2, MAD2L2, MED25, MMAB, NFIB, NME1, PCBD1, PKD1, PLK1, RFNG, RSF1, SP100, TGFB1, TMEM173, TRIB3, ZFP90, ZNF675]
GO:0051100	negative regulation of binding	16	18.1818	0.0168783	[AURKB, BAX, CARM1, DVL1, EPB41L5, GSK3B, IFI16, ITGA4, JAK2, LHX2, MAD2L2, NFIB, RSF1, SP100, ZFP90, ZNF675]
GO:0051101	regulation of DNA binding	13	17.3333	0.0415433	[ACD, ERCC2, IFI16, JAK2, LHX2, MAD2L2, NFIB, NME1, RSF1, SP100, TGFB1, ZFP90, ZNF675]
GO:0051168	nuclear export	22	15.942	0.0251088	[AGFG1, ATXN1, CAMK4, CPSF1, DDX39A, EGR2, EMD, GAS6, GSK3B, NEMF, PKD1, RANGAP1, RBM8A, RITA1, SMG5, SP100, SRSF6, STRADA, TGFB1, THOC6, UHMK1, XPO6]
GO:0051171	regulation of nitrogen compound metabolic process	536	13.3566	2.952358113886336E-13	[ABT1, ACD, ACVR1, ACVRL1, AGAP2, AGFG1, AGO2, AHRR, ALKBH4, AMH, ANKRD1, ANXA3, APOBEC3F, ARHGAP27, ARHGAP9, ARHGEF1, ARHGEF10L, ARHGEF16, ARHGEF17, ARHGEF19, ARHGEF4, ARHGEF6, ARNTL, ASF1B, ASXL3, ATF5, ATF6, ATXN1, AURKAIP1, AURKB, AXIN1, BAG4, BAX, BAZ2B, BBX, BCL10, BCL2L12, BCOR, BCORL1, BDP1, BEX1, BLOC1S2, BRMS1L, BRWD1, BTG2, C1orf85, C6orf1, CALCOCO1, CALCRL, CAMK4, CAMTA2, CAPN15, CARM…
GO:0051172	negative regulation of nitrogen compound metabolic process	135	12.3853	0.0120171	[ACD, ACVRL1, AHRR, ANKRD1, APOBEC3F, ATXN1, AURKB, AXIN1, BAG4, BCOR, BRMS1L, CBX6, CCDC85B, CHD8, CHEK2, CIR1, CPEB2, CTR9, CUX2, DAP, DDX20, DEDD, DHX34, DNAJB6, DNPEP, E2F8, E4F1, EDN1, EDNRB, EZH1, FBXW7, FGFR2, FNIP1, GAS6, GATAD2A, GLIS3, GPS2, HCFC2, HDAC5, HDAC6, HDAC9, HELLS, HEXIM1, HUS1, IFI16, IGBP1, IRF7, KDM5B, KLF11, LMCD1, MAD2L2, MBD3, MED25, MMAB, MOSPD1, MXD3, MYBBP1A, MYC, N4…
GO:0051174	regulation of phosphorus metabolic process	194	11.5752	0.0388225	[ACD, ACSL1, ACVR1, ACVRL1, ADCY2, ADCY3, ADCY5, ADCY9, AGAP2, AGFG1, AMH, ANXA2, ARHGAP27, ARHGAP9, ARHGEF1, ARHGEF10L, ARHGEF16, ARHGEF17, ARHGEF19, ARHGEF4, ARHGEF6, ARL6IP5, ATF6, ATP7A, ATXN1, AXIN1, BAG4, BAX, BCL10, BRAF, CALCRL, CARD10, CBS, CCDC88C, CCNE1, CCNT2, CDC25A, CDC25B, CDKL5, CDKN2C, CDKN2D, CHAMP1, CNKSR2, CNPPD1, COPS5, CPEB2, CREBL2, CXCR4, DBF4B, DDX11, DENND1A, DENND4A, DE…
GO:0051188	cofactor biosynthetic process	22	15.0685	0.0437816	[ACACA, ACSL1, ACSS2, BDH2, COASY, COQ3, ELOVL1, IREB2, MOCS1, MOCS3, MTHFD1, MTHFD1L, MTHFSD, NAPRT1, NFS1, NMNAT2, PCBD1, PCBD2, PPCDC, QDPR, RFK, SLC25A1]
GO:0051189	prosthetic group metabolic process	3	42.8571	0.0277423	[MOCS1, MOCS3, NFS1]
GO:0051225	spindle assembly	13	27.6596	6.846551923728967E-4	[AURKB, CHEK2, HAUS2, INO80, KIF23, MAP9, MYBL2, NCOR1, NEK7, OFD1, RCC1, SAC3D1, SENP6]
GO:0051252	regulation of RNA metabolic process	458	13.9507	3.672568090864117E-14	[ABT1, ACVR1, ACVRL1, AGAP2, AGO2, AHRR, ALKBH4, AMH, ANKRD1, ANXA3, APOBEC3F, ARHGEF10L, ARNTL, ASF1B, ASXL3, ATF5, ATF6, ATXN1, AURKAIP1, AURKB, AXIN1, BAG4, BAZ2B, BBX, BCL10, BCL2L12, BCOR, BCORL1, BDP1, BEX1, BLOC1S2, BRMS1L, BRWD1, BTG2, C1orf85, C6orf1, CALCOCO1, CAMK4, CAMTA2, CAPN15, CARM1, CBX6, CCDC85B, CCNE1, CCNT2, CDCA7L, CENPB, CHD2, CHD6, CHD8, CHEK2, CIR1, CLU, CNOT8, COPS5, CREB…
GO:0051253	negative regulation of RNA metabolic process	121	12.4742	0.0137381	[AHRR, ANKRD1, APOBEC3F, ATXN1, AURKB, AXIN1, BAG4, BCOR, BRMS1L, CBX6, CCDC85B, CHD8, CIR1, CTR9, CUX2, DAP, DDX20, DEDD, DHX34, DNAJB6, DNPEP, E2F8, E4F1, EDN1, EDNRB, EZH1, FGFR2, FNIP1, GAS6, GATAD2A, GLIS3, GPS2, HCFC2, HDAC5, HDAC6, HDAC9, HELLS, HEXIM1, IFI16, IGBP1, IRF7, KDM5B, KLF11, LMCD1, MAD2L2, MBD3, MED25, MOSPD1, MXD3, MYBBP1A, MYC, N4BP2L2, NCOR1, NFIB, NFIC, NR1D2, ORC2, PAWR, P…
GO:0051276	chromosome organization	103	12.2619	0.0329984	[ACD, ASF1B, AURKB, BCOR, BCORL1, CARM1, CBX6, CDCA8, CECR2, CENPA, CENPP, CENPQ, CENPT, CENPV, CHAMP1, CHD2, CHD6, CHD8, CIT, CTR9, DAPK3, DDX11, DPY30, ESPL1, FAM175A, FBXW7, H1F0, HDAC5, HDAC6, HDAC9, HELLS, HIST1H1C, HIST1H2BK, HIST2H2BE, HMGN3, HMGN5, INO80, JAK2, KAT2B, KATNB1, KDM1B, KDM3A, KDM5B, KDM7A, KMT2E, L3MBTL2, L3MBTL3, LIF, LRWD1, MBD3, MBIP, MCRS1, MYC, NAP1L5, NCAPH, NCOA3, NCO…
GO:0051289	protein homotetramerization	11	18.6441	0.0365184	[ACACA, CBR4, COASY, CRYZ, DCTPP1, HPRT1, PCBD1, PCBD2, RYR3, TK1, VASP]
GO:0051297	centrosome organization	14	17.5	0.0328514	[CCNF, CEP68, CETN3, CROCC, FBXW5, HAUS2, NUBP1, NUBP2, OFD1, PLK1, SAC3D1, TMEM67, UXT, XRCC3]
GO:0051298	centrosome duplication	8	20.5128	0.0422592	[CCNF, FBXW5, NUBP1, NUBP2, OFD1, SAC3D1, TMEM67, XRCC3]
GO:0051301	cell division	94	12.2396	0.0418327	[ALKBH4, ANAPC15, ANXA11, AURKAIP1, AURKB, BECN1, BORA, CABLES2, CCNE1, CCNF, CCNG2, CCNT2, CDC25A, CDC25B, CDCA3, CDCA8, CECR2, CENPT, CENPV, CEP55, CETN3, CHAMP1, CHEK2, CIT, CSNK1A1, DAPK3, DDX11, DIXDC1, E2F8, E4F1, EDN1, ERCC2, ESPL1, FAM83D, FBXW5, FGFR2, FMN2, GIPC1, GNAI1, HAUS2, HELLS, HFM1, HSF1, INO80, KATNB1, KIF18B, KIF20A, KIF22, KIF23, KLHL21, LIF, MAD2L2, MAP9, MAPRE3, MYBL2, MYC,…
GO:0051302	regulation of cell division	33	14.0426	0.040565	[ANAPC15, AURKAIP1, AURKB, BORA, CABLES2, CDC25B, CENPV, DAPK3, E2F8, EDN1, ESPL1, FGFR2, GIPC1, KIF18B, KIF23, KLHL21, LIF, MAD2L2, MAP9, MYC, PDE3A, PKMYT1, PLK1, RB1, RCC1, SH2B1, SIRT2, TGFB1, TGFB3, TOM1L1, TXNIP, UBE2C, XRCC3]
GO:0051382	kinetochore assembly	4	28.5714	0.0482955	[CENPA, CENPT, POGZ, SENP6]
GO:0051383	kinetochore organization	5	29.4118	0.0247581	[CENPA, CENPT, POGZ, RAB33B, SENP6]
GO:0051488	activation of anaphase-promoting complex activity	3	37.5	0.0410436	[CDC14B, PLK1, UBE2C]
GO:0051642	centrosome localization	4	28.5714	0.0482955	[DYNC1LI2, NUBP1, NUBP2, SUN2]
GO:0051726	regulation of cell cycle	112	13.9303	4.975745480269931E-4	[AMH, ANAPC15, ARNTL, AURKAIP1, AURKB, BAX, BEX1, BID, BORA, CABLES2, CCNE1, CCNF, CCNG2, CCNT2, CDC25A, CDC25B, CDKN2C, CDKN2D, CENPV, CHEK2, CNPPD1, COPS5, CRADD, CREB3, CRLF3, CSNK2A2, CYLD, DAPK3, E2F2, E2F8, E4F1, EDN1, ERCC2, ESPL1, FBXO31, FBXW7, FGFR2, FOXO4, GAS1, GAS2L1, GAS2L3, GAS6, GIPC1, GTSE1, HBP1, HEXIM1, HSF1, HUS1, IER3, INO80, JUNB, KAT2B, KIF23, KLHL21, KMT2E, LEMD3, LIF, MAD…
GO:0051782	negative regulation of cell division	3	37.5	0.0410436	[E2F8, MYC, TXNIP]
GO:0051788	response to misfolded protein	3	37.5	0.0410436	[CLU, HDAC6, UBE2W]
GO:0051972	regulation of telomerase activity	4	33.3333	0.028181	[ACD, PIF1, POT1, WRAP53]
GO:0051973	positive regulation of telomerase activity	3	60	0.00928406	[ACD, POT1, WRAP53]
GO:0055086	nucleobase-containing small molecule metabolic process	147	12.0196	0.0234601	[ACACA, ADCY2, ADCY3, ADCY9, ADK, AGAP2, AGFG1, APOBEC3F, ARHGAP27, ARHGAP9, ARHGEF1, ARHGEF10L, ARHGEF16, ARHGEF17, ARHGEF19, ARHGEF4, ARHGEF6, ARL4C, ATP5G1, ATP6V1B2, AXIN1, CALCRL, CBS, CDKL5, CECR1, CHD8, CLPX, COASY, CPEB2, CROT, DCTPP1, DDX11, DDX20, DDX54, DENND1A, DENND4A, DENND4B, DENND5B, DENND6B, DHODH, DIRAS1, DIS3, DNAJB6, DOCK4, DOCK5, DTYMK, DUT, EDN1, EDNRB, EIF2B1, ELMOD2, EPHB3…
GO:0055129	L-proline biosynthetic process	3	60	0.00928406	[ALDH18A1, OAT, PYCR2]
GO:0060151	peroxisome localization	3	100	0.00108947	[PEX1, PEX13, ZNF260]
GO:0060152	microtubule-based peroxisome localization	3	100	0.00108947	[PEX1, PEX13, ZNF260]
GO:0060236	regulation of mitotic spindle organization	3	37.5	0.0410436	[BORA, PKD1, PSRC1]
GO:0060255	regulation of macromolecule metabolic process	603	12.735	4.3622417056195374E-11	[ABT1, ACD, ACER2, ACHE, ACSL1, ACVR1, ACVRL1, ADCY2, ADCY3, ADCY5, ADCY9, ADK, AGAP2, AGO2, AHRR, AIFM2, AIMP2, ALKBH4, AMH, ANKRD1, ANXA2, ANXA3, APOBEC3F, ARHGEF10L, ARNTL, ASF1B, ASXL3, ATF5, ATF6, ATP7A, ATXN1, AURKAIP1, AURKB, AXIN1, BAG4, BAX, BAZ2B, BBS2, BBX, BCL10, BCL2L12, BCOR, BCORL1, BDP1, BEX1, BLOC1S2, BRAF, BRMS1L, BRWD1, BTG2, C1orf85, C6orf1, CALCOCO1, CAMK4, CAMTA2, CAPN15, CA…
GO:0060363	cranial suture morphogenesis	4	40	0.0141286	[FGFR2, INSIG2, TGFB1, TGFB3]
GO:0060502	epithelial cell proliferation involved in lung morphogenesis	3	42.8571	0.0277423	[FGFR2, NFIB, SRSF6]
GO:0060712	spongiotrophoblast layer development	4	28.5714	0.0482955	[FBXW8, LIF, SOCS3, ZFAT]
GO:0060713	labyrinthine layer morphogenesis	5	25	0.0479426	[DNAJB6, FGFR2, ITGA4, NCOA3, SOCS3]
GO:0061082	myeloid leukocyte cytokine production	6	27.2727	0.020703	[AMH, BCL10, CAMK4, GAS6, TGFB1, TGFB3]
GO:0065002	intracellular protein transmembrane transport	8	22.8571	0.023283	[PEX1, PEX10, PEX13, PEX6, PEX7, SAMM50, TIMM22, ZNF260]
GO:0070085	glycosylation	41	14.1379	0.0224256	[ACER2, ALG11, ALG13, ALG3, ALG6, ALG9, B3GALT1, B4GALNT1, B4GALT2, COG3, DPM2, DPM3, EOGT, GALNT1, GALNT16, GALNT7, GCNT2, GCNT4, GNPNAT1, KAT2B, MANEA, MGAT3, MOGS, MVD, NAGPA, OGT, PARP16, PGM3, PIGZ, PMM1, POGLUT1, SDF2, SIRT2, SIRT5, ST3GAL3, ST3GAL4, ST6GAL1, ST6GALNAC4, ST8SIA1, TET2, TMEM59]
GO:0070266	necroptotic process	6	31.5789	0.00983509	[CYLD, FADD, FAS, PGAM5, SLC25A4, YBX3]
GO:0070498	interleukin-1-mediated signaling pathway	4	28.5714	0.0482955	[IRAK1, RPS6KA5, TNIP2, ZNF675]
GO:0070507	regulation of microtubule cytoskeleton organization	18	18.9474	0.00768547	[AURKB, BORA, CCNF, CYLD, DIXDC1, GAS2L1, HDAC6, KATNB1, MID1IP1, NUBP1, NUBP2, PKD1, PSRC1, SENP6, SKA1, TBCD, TMEM67, XRCC3]
GO:0070647	protein modification by small protein conjugation or removal	88	12.2563	0.0463739	[AHRR, AIMP2, AXIN1, BCL10, BCOR, BLMH, CCNF, CDC14B, CDCA3, CISH, CLU, CNOT4, COPS5, COPS7A, CRBN, CTR9, CTU2, CYLD, DTX2, DZIP3, E4F1, EGR2, ERCC8, FBXL3, FBXO22, FBXO3, FBXO31, FBXO33, FBXO9, FBXW5, FBXW7, GLMN, HDAC6, HECW1, HERC3, IRAK1, KLHL15, KLHL21, MAD2L2, MKRN3, MYLIP, NEURL1B, NEURL2, NSMCE1, NUB1, OGT, OTUB2, PELI3, PINK1, PLK1, RASSF1, RASSF3, RLIM, RNF13, RNF139, RNF144A, RNF167, R…
GO:0070933	histone H4 deacetylation	3	37.5	0.0410436	[HDAC9, REST, SMARCAD1]
GO:0071168	protein localization to chromatin	3	37.5	0.0410436	[LRWD1, PLK1, RB1]
GO:0072523	purine-containing compound catabolic process	93	12.5846	0.0230794	[AGAP2, AGFG1, ARHGAP27, ARHGAP9, ARHGEF1, ARHGEF10L, ARHGEF16, ARHGEF17, ARHGEF19, ARHGEF4, ARHGEF6, ARL4C, AXIN1, CDKL5, CECR1, CHD8, CLPX, CPEB2, DDX11, DDX20, DDX54, DENND1A, DENND4A, DENND4B, DENND5B, DENND6B, DIRAS1, DIS3, DNAJB6, DOCK4, DOCK5, EIF2B1, ELMOD2, EPHB3, ERCC2, FBXO8, FGD4, FNIP1, GIT1, GNAQ, GNB3, GNG3, GSK3B, HPRT1, IGHMBP2, INO80, IQSEC2, KATNB1, LAMTOR2, MED12, MLST8, MUTYH…
GO:0072577	endothelial cell apoptotic process	7	24.1379	0.0248468	[ANGPTL4, CD248, GAS6, PRKCI, RAMP2, TNFAIP3, TNIP2]
GO:0072662	protein localization to peroxisome	6	31.5789	0.00983509	[PEX1, PEX10, PEX13, PEX6, PEX7, ZNF260]
GO:0072663	establishment of protein localization to peroxisome	6	31.5789	0.00983509	[PEX1, PEX10, PEX13, PEX6, PEX7, ZNF260]
GO:0072698	protein localization to microtubule cytoskeleton	3	37.5	0.0410436	[CHAMP1, DVL1, GSK3B]
GO:0080090	regulation of primary metabolic process	635	12.7433	6.654570259244462E-12	[ABT1, ACD, ACER2, ACSL1, ACVR1, ACVRL1, ADCY2, ADCY3, ADCY5, ADCY9, AGAP2, AGFG1, AGO2, AHRR, AIFM2, AIMP2, ALKBH4, AMH, ANKRD1, ANXA2, ANXA3, APOBEC3F, ARHGAP27, ARHGAP9, ARHGEF1, ARHGEF10L, ARHGEF16, ARHGEF17, ARHGEF19, ARHGEF4, ARHGEF6, ARNTL, ASF1B, ASXL3, ATF5, ATF6, ATXN1, AURKAIP1, AURKB, AXIN1, BAG4, BAX, BAZ2B, BBX, BCL10, BCL2L12, BCOR, BCORL1, BDP1, BEX1, BLOC1S2, BRAF, BRMS1L, BRWD1,…
GO:0085029	extracellular matrix assembly	5	31.25	0.019055	[ATP7A, GAS6, HAS2, TGFB1, THSD4]
GO:0090003	regulation of establishment of protein localization to plasma membrane	9	21.9512	0.0213974	[ARHGEF16, KIF5B, LYPLAL1, PRKCI, RANGRF, RHOG, TMEM59, VAMP4, WNK3]
GO:0090004	positive regulation of establishment of protein localization to plasma membrane	6	27.2727	0.020703	[ARHGEF16, KIF5B, PRKCI, RANGRF, RHOG, WNK3]
GO:0090042	tubulin deacetylation	3	60	0.00928406	[HDAC6, SIRT2, TADA3]
GO:0090224	regulation of spindle organization	5	41.6667	0.00489709	[AURKB, BORA, PKD1, PSRC1, SENP6]
GO:0090304	nucleic acid metabolic process	622	12.7668	9.494882398503579E-12	[AARS2, ABT1, ACD, ACHE, ACVR1, ACVRL1, ADAT3, AGAP2, AGGF1, AGO2, AHRR, AIMP1, AIMP2, ALKBH4, ALKBH8, AMH, ANKRD1, ANXA3, AP5Z1, APOBEC3F, ARHGEF10L, ARNTL, ASF1B, ASXL3, ATF5, ATF6, ATXN1, AURKAIP1, AURKB, AXIN1, BAG4, BAX, BAZ2B, BBX, BCL10, BCL2L12, BCOR, BCORL1, BDP1, BEX1, BLOC1S2, BRMS1L, BRWD1, BTG2, C1orf85, C6orf1, CALCOCO1, CAMK4, CAMTA2, CAPN15, CARM1, CARS2, CBX6, CCDC85B, CCNE1, CCN…
GO:0090307	spindle assembly involved in mitosis	5	31.25	0.019055	[AURKB, CHEK2, KIF23, MYBL2, OFD1]
GO:0090312	positive regulation of protein deacetylation	4	30.7692	0.0374658	[BRMS1L, NCOR1, SREBF1, TGFB1]
GO:0097094	craniofacial suture morphogenesis	4	30.7692	0.0374658	[FGFR2, INSIG2, TGFB1, TGFB3]
GO:0097300	programmed necrotic cell death	6	28.5714	0.0164558	[CYLD, FADD, FAS, PGAM5, SLC25A4, YBX3]
GO:0097502	mannosylation	5	35.7143	0.0103917	[ALG3, DPM2, DPM3, PIGZ, SDF2]
GO:0097503	sialylation	5	26.3158	0.0391693	[ST3GAL3, ST3GAL4, ST6GAL1, ST6GALNAC4, ST8SIA1]
GO:1901030	positive regulation of mitochondrial outer membrane permeabilization involved in apoptotic signaling pathway	4	50	0.00557354	[BAX, BID, GSK3B, ZNF205]
GO:1901068	guanosine-containing compound metabolic process	68	12.8544	0.0317162	[AGAP2, AGFG1, ARHGAP27, ARHGAP9, ARHGEF1, ARHGEF10L, ARHGEF16, ARHGEF17, ARHGEF19, ARHGEF4, ARHGEF6, ARL4C, AXIN1, CDKL5, CPEB2, DENND1A, DENND4A, DENND4B, DENND5B, DENND6B, DIRAS1, DIS3, DOCK4, DOCK5, EIF2B1, ELMOD2, EPHB3, FBXO8, FGD4, FNIP1, GIT1, GNAQ, GNB3, GNG3, GSK3B, GUK1, HPRT1, IMPDH1, IQSEC2, LAMTOR2, MED12, MLST8, NCOA3, NME1, PGAM5, PRTFDC1, RAB3A, RAB8A, RABL2B, RAC3, RALGAPA2, RAN…
GO:1901069	guanosine-containing compound catabolic process	65	12.8459	0.0354936	[AGAP2, AGFG1, ARHGAP27, ARHGAP9, ARHGEF1, ARHGEF10L, ARHGEF16, ARHGEF17, ARHGEF19, ARHGEF4, ARHGEF6, ARL4C, AXIN1, CDKL5, CPEB2, DENND1A, DENND4A, DENND4B, DENND5B, DENND6B, DIRAS1, DIS3, DOCK4, DOCK5, EIF2B1, ELMOD2, EPHB3, FBXO8, FGD4, FNIP1, GIT1, GNAQ, GNB3, GNG3, GSK3B, HPRT1, IQSEC2, LAMTOR2, MED12, MLST8, NCOA3, PGAM5, PRTFDC1, RAB3A, RAB8A, RABL2B, RAC3, RALGAPA2, RANGAP1, RANGRF, RAP1B,…
GO:1901070	guanosine-containing compound biosynthetic process	6	27.2727	0.020703	[GUK1, HPRT1, IMPDH1, NME1, PRTFDC1, RP2]
GO:1901135	carbohydrate derivative metabolic process	204	11.8398	0.0152248	[ABCC5, ACACA, ACER2, ADCY2, ADK, AGAP2, AGFG1, ALG11, ALG13, ALG3, ALG6, ALG9, APOBEC3F, ARHGAP27, ARHGAP9, ARHGEF1, ARHGEF10L, ARHGEF16, ARHGEF17, ARHGEF19, ARHGEF4, ARHGEF6, ARL4C, ARSK, ATP5G1, ATP6V1B2, ATP7A, AXIN1, B3GALT1, B4GALNT1, B4GALT2, BAX, CALCRL, CBR4, CBS, CDKL5, CECR1, CHD8, CHID1, CLN6, CLPX, COASY, COG3, CPEB2, CROT, CTSA, DDX11, DDX20, DDX54, DENND1A, DENND4A, DENND4B, DENND5…
GO:1901292	nucleoside phosphate catabolic process	95	12.5165	0.0248018	[AGAP2, AGFG1, ARHGAP27, ARHGAP9, ARHGEF1, ARHGEF10L, ARHGEF16, ARHGEF17, ARHGEF19, ARHGEF4, ARHGEF6, ARL4C, AXIN1, CDKL5, CHD8, CLPX, CPEB2, DCTPP1, DDX11, DDX20, DDX54, DENND1A, DENND4A, DENND4B, DENND5B, DENND6B, DIRAS1, DIS3, DNAJB6, DOCK4, DOCK5, EIF2B1, ELMOD2, EPHB3, ERCC2, FBXO8, FGD4, FNIP1, GIT1, GNAQ, GNB3, GNG3, GSK3B, HPRT1, IGHMBP2, INO80, IQSEC2, KATNB1, LAMTOR2, MED12, MLST8, MUTY…
GO:1901360	organic cyclic compound metabolic process	777	12.3628	2.3756994106436768E-12	[AARS2, ABCG2, ABT1, ACACA, ACD, ACHE, ACVR1, ACVRL1, ADAT3, ADCY2, ADCY3, ADCY9, ADK, AFP, AGAP2, AGFG1, AGGF1, AGO2, AHRR, AIFM2, AIMP1, AIMP2, ALDH18A1, ALDH4A1, ALKBH4, ALKBH8, AMH, ANKRD1, ANXA3, AP5Z1, APOBEC3F, ARHGAP27, ARHGAP9, ARHGEF1, ARHGEF10L, ARHGEF16, ARHGEF17, ARHGEF19, ARHGEF4, ARHGEF6, ARL4C, ARNTL, ASF1B, ASXL3, ATF5, ATF6, ATP5G1, ATP6V1B2, ATP7A, ATXN1, AURKAIP1, AURKB, AXIN1…
GO:1901362	organic cyclic compound biosynthetic process	542	13.0571	1.320119094044011E-11	[ABT1, ACACA, ACVR1, ACVRL1, ADCY2, ADCY3, ADCY9, ADK, AGAP2, AGO2, AHRR, AIFM2, ALDH18A1, ALDH4A1, ALKBH4, AMH, ANKRD1, ANXA3, ARHGEF10L, ARNTL, ASF1B, ASXL3, ATF5, ATF6, ATP5G1, ATP7A, ATXN1, AURKAIP1, AURKB, AXIN1, BAZ2B, BBX, BCL10, BCL2L12, BCOR, BCORL1, BDP1, BEX1, BLOC1S2, BRMS1L, BRWD1, C1orf85, C6orf1, CACNA1H, CALCOCO1, CALCRL, CAMK4, CAMTA2, CAPN15, CARM1, CBX6, CCDC85B, CCNE1, CCNT2, …
GO:1901566	organonitrogen compound biosynthetic process	92	12.5	0.0276696	[ABCC5, ACACA, ACER2, ACHE, ADCY2, ADK, AIFM2, ALDH18A1, ALDH4A1, ATP5G1, ATP7A, B4GALNT1, B4GALT2, BCAT2, BDH2, CALCRL, CBS, CDO1, CECR1, CERS6, CHDH, CHEK2, COASY, CSAD, DHODH, DOHH, DTYMK, DUT, EDN1, EDNRB, EIF2B1, EIF5A2, ELOVL1, GCNT2, GGT7, GNAL, GPT2, GUK1, HAS2, HECA, HPRT1, IMPDH1, IREB2, MMAA, MMAB, MOCS1, MOCS3, MRPS28, MTHFD1, MTHFD1L, MTHFSD, NAPRT1, NCAN, NDST2, NFS1, NME1, NMNAT2, …
GO:1901576	organic substance biosynthetic process	713	12.6016	8.890591045236907E-13	[AARS2, AASDHPPT, ABCC5, ABT1, ACACA, ACD, ACER2, ACHE, ACSL1, ACSS2, ACVR1, ACVRL1, ADCY2, ADCY3, ADCY9, ADK, AGAP2, AGO2, AGPAT4, AHRR, AIFM2, AIMP1, AIMP2, AKR1A1, ALDH18A1, ALDH4A1, ALG11, ALG13, ALG3, ALG6, ALG9, ALKBH4, AMH, ANKRD1, ANXA3, ARHGEF10L, ARNTL, ASF1B, ASXL3, ATF5, ATF6, ATP5G1, ATP7A, ATXN1, AURKAIP1, AURKB, AXIN1, B3GALT1, B4GALNT1, B4GALT2, BAZ2B, BBX, BCAT2, BCL10, BCL2L12, …
GO:1901642	nucleoside transmembrane transport	3	37.5	0.0410436	[SLC29A1, SLC29A2, SLC35B2]
GO:1901652	response to peptide	55	12.8505	0.049426	[ADCY2, ADCY3, ADCY5, ADCY9, ATP6V0E2, ATP6V1B2, ATP6V1C1, ATP6V1G1, BRAF, BTG2, CAPN10, CDO1, CISH, COASY, CPEB2, CYC1, EEF2K, EGR2, EIF2B1, FABP3, FGFR2, FOXO4, FRS2, GNAI1, GNB3, GNG3, GRB10, HDAC5, HDAC9, INSIG2, IRS2, JAK2, JUNB, KANK1, KAT2B, KLF11, MBD5, MLST8, MTUS1, OGT, OXTR, PCSK9, PIK3C2A, PIK3CA, PRKAB2, PRKCI, QDPR, RAB8A, RARRES2, SOCS3, SOCS4, SREBF1, STRADA, TNFAIP3, TRIB3]
GO:1901657	glycosyl compound metabolic process	114	12.8234	0.00744995	[ACACA, ADK, AGAP2, AGFG1, APOBEC3F, ARHGAP27, ARHGAP9, ARHGEF1, ARHGEF10L, ARHGEF16, ARHGEF17, ARHGEF19, ARHGEF4, ARHGEF6, ARL4C, ATP5G1, ATP6V1B2, AXIN1, CBR4, CDKL5, CECR1, CHD8, CLPX, COASY, CPEB2, CROT, DDX11, DDX20, DDX54, DENND1A, DENND4A, DENND4B, DENND5B, DENND6B, DHODH, DIRAS1, DIS3, DNAJB6, DOCK4, DOCK5, DUT, EIF2B1, ELMOD2, EPHB3, ERCC2, FBXO8, FGD4, FNIP1, GIT1, GNAQ, GNB3, GNG3, GSK…
GO:1901658	glycosyl compound catabolic process	88	12.5714	0.027147	[AGAP2, AGFG1, APOBEC3F, ARHGAP27, ARHGAP9, ARHGEF1, ARHGEF10L, ARHGEF16, ARHGEF17, ARHGEF19, ARHGEF4, ARHGEF6, ARL4C, AXIN1, CDKL5, CECR1, CHD8, CLPX, CPEB2, DDX11, DDX20, DDX54, DENND1A, DENND4A, DENND4B, DENND5B, DENND6B, DIRAS1, DIS3, DOCK4, DOCK5, EIF2B1, ELMOD2, EPHB3, ERCC2, FBXO8, FGD4, FNIP1, GIT1, GNAQ, GNB3, GNG3, GSK3B, HPRT1, IGHMBP2, INO80, IQSEC2, KATNB1, LAMTOR2, MED12, MLST8, NCO…
GO:1901659	glycosyl compound biosynthetic process	21	16.5354	0.0194724	[ACACA, ADK, ATP5G1, CECR1, COASY, DHODH, DUT, GUK1, HPRT1, IMPDH1, NME1, PPCDC, PRPS2, PRTFDC1, RP2, SLC35B2, SLC35B3, TGFB1, TK1, UCK1, UPP1]
GO:1902101	positive regulation of metaphase/anaphase transition of cell cycle	3	42.8571	0.0277423	[ESPL1, PLK1, RB1]
GO:1902589	single-organism organelle organization	222	12.3333	0.00172977	[AARS2, ACD, ALKBH4, ANAPC15, ANKRD1, ANXA2, ARHGDIB, ARHGEF10L, ARHGEF17, ARHGEF19, ARPC3, AURKAIP1, AURKB, AXIN1, BAG4, BAX, BBS2, BCOR, BID, BLOC1S2, BNIP3L, BORA, CAMSAP2, CAPN10, CARM1, CCNF, CCNG2, CCSER2, CDC25A, CDC25B, CDCA3, CDCA8, CENPA, CENPT, CENPV, CEP55, CEP68, CETN3, CHAMP1, CHEK2, CIT, CNN1, COPZ1, CORO1B, CORO6, CROCC, CSNK1A1, CTR9, CYLD, DAPK3, DDX11, DIXDC1, DNAJB6, DPY30, DV…
GO:1902679	negative regulation of RNA biosynthetic process	115	12.2995	0.023415	[AHRR, ANKRD1, ATXN1, AURKB, AXIN1, BCOR, BRMS1L, CBX6, CCDC85B, CHD8, CIR1, CTR9, CUX2, DAP, DDX20, DEDD, DNAJB6, DNPEP, E2F8, E4F1, EDN1, EDNRB, EZH1, FGFR2, FNIP1, GAS6, GATAD2A, GLIS3, GPS2, HCFC2, HDAC5, HDAC6, HDAC9, HELLS, HEXIM1, IFI16, IGBP1, IRF7, KDM5B, KLF11, LMCD1, MAD2L2, MBD3, MED25, MOSPD1, MXD3, MYBBP1A, MYC, N4BP2L2, NCOR1, NFIB, NFIC, NR1D2, ORC2, PAWR, PBXIP1, PDCD4, PFDN5, PG…
GO:2000060	positive regulation of protein ubiquitination involved in ubiquitin-dependent protein catabolic process	4	36.3636	0.0204197	[AXIN1, CLU, FBXO22, FBXW7]
GO:2000112	regulation of cellular macromolecule biosynthetic process	480	13.9252	8.37225496683787E-15	[ABT1, ACD, ACER2, ACVR1, ACVRL1, AGAP2, AGO2, AHRR, AIFM2, ALKBH4, AMH, ANKRD1, ANXA3, ARHGEF10L, ARNTL, ASF1B, ASXL3, ATF5, ATF6, ATXN1, AURKB, AXIN1, BAZ2B, BBX, BCL10, BCL2L12, BCOR, BCORL1, BDP1, BEX1, BLOC1S2, BRMS1L, BRWD1, BTG2, C1orf85, C6orf1, CALCOCO1, CAMK4, CAMTA2, CAPN15, CARM1, CBX6, CCDC85B, CCNE1, CCNT2, CDCA7L, CENPB, CHD2, CHD6, CHD8, CHEK2, CIR1, CIRBP, CLU, CNOT8, COPS5, CPEB…
GO:2000113	negative regulation of cellular macromolecule biosynthetic process	137	13.085	0.00166563	[ACD, ACER2, ACVRL1, AGO2, AHRR, AIFM2, ANKRD1, ATXN1, AURKB, BCOR, BRMS1L, BTG2, CBX6, CCDC85B, CHD8, CHEK2, CIR1, CPEB2, CTR9, CUX2, DAP, DAPK3, DDX20, DEDD, DNAJB6, DNPEP, E2F8, E4F1, EDN1, EDNRB, EIF2B1, EZH1, FBXW7, FGFR2, FNIP1, GAS6, GATAD2A, GLIS3, GPS2, GRB10, GSK3B, HBEGF, HCFC2, HDAC5, HDAC6, HDAC9, HELLS, HEXIM1, HUS1, IFI16, IGBP1, IRF7, KDM5B, KLF11, LMCD1, MAD2L2, MBD3, MED25, MMAB…
GO:2000270	negative regulation of fibroblast apoptotic process	3	37.5	0.0410436	[CHD8, GAS6, PIK3CA]
GO:2000278	regulation of DNA biosynthetic process	6	26.087	0.0256349	[ACVRL1, ANKRD1, MYC, NOX4, SH2B1, TOM1L1]
GO:2000351	regulation of endothelial cell apoptotic process	7	26.9231	0.0137383	[ANGPTL4, CD248, GAS6, PRKCI, RAMP2, TNFAIP3, TNIP2]
GO:2000352	negative regulation of endothelial cell apoptotic process	5	31.25	0.019055	[ANGPTL4, GAS6, RAMP2, TNFAIP3, TNIP2]
GO:2000794	regulation of epithelial cell proliferation involved in lung morphogenesis	3	50	0.0171527	[FGFR2, NFIB, SRSF6]
GO:2001056	positive regulation of cysteine-type endopeptidase activity	20	16.2602	0.0261817	[ACER2, ARL6IP5, BAX, BCL10, BID, BOK, CARD8, CRADD, DAP, DNPEP, FADD, FAS, IFI16, JAK2, MYC, NGFRAP1, NLRP2, PRELID1, REST, RPS27L]
GO:2001141	regulation of RNA biosynthetic process	449	14.062	1.93741566654135E-14	[ABT1, ACVR1, ACVRL1, AGAP2, AGO2, AHRR, ALKBH4, AMH, ANKRD1, ANXA3, ARHGEF10L, ARNTL, ASF1B, ASXL3, ATF5, ATF6, ATXN1, AURKAIP1, AURKB, AXIN1, BAZ2B, BBX, BCL10, BCL2L12, BCOR, BCORL1, BDP1, BEX1, BLOC1S2, BRMS1L, BRWD1, C1orf85, C6orf1, CALCOCO1, CAMK4, CAMTA2, CAPN15, CARM1, CBX6, CCDC85B, CCNE1, CCNT2, CDCA7L, CENPB, CHD2, CHD6, CHD8, CHEK2, CIR1, CLU, CNOT8, COPS5, CREB3, CREBL2, CRLF3, CSNK…
GO:2001267	regulation of cysteine-type endopeptidase activity involved in apoptotic signaling pathway	3	50	0.0171527	[BAX, JAK2, NLE1]

## Sheet: NSC_KD_shG
GOID	GOTerm	Nr. Genes	% Associated Genes	Term PValue	Associated Genes Found
GO:0000266	mitochondrial fission	6	25	0.00492794	[BAX, DHODH, ERBB4, FIS1, GDAP1, MTFR2]
GO:0000280	nuclear division	50	9.4162	0.0159562	[ANAPC13, ANAPC15, BORA, BRCA2, CDC25B, CDCA2, CENPC, CENPE, CEP164, CEP55, CETN3, CHEK2, DSCC1, EDN1, FSD1, FZR1, HAUS1, HAUS4, HAUS7, HELLS, IL1A, ITGB3BP, KIAA0430, KIF18A, KIF23, LATS2, LIF, LIG3, LRP5, LRRCC1, MAPRE3, NCAPG, NUP37, OIP5, PAPD7, PRMT5, RBBP8, SIRT7, SMC1A, SMC5, SNX18, SPIRE2, STAG1, TADA3, TDRKH, TGFB1, TOM1L1, TTK, USP37, ZC3HC1]
GO:0000289	nuclear-transcribed mRNA poly(A) tail shortening	6	17.1429	0.0311553	[AGO2, BTG2, EIF4A2, PAN2, TOB1, ZFP36]
GO:0000387	spliceosomal snRNP assembly	7	19.4444	0.0105475	[GEMIN8, NCBP1, NCBP2, PRMT5, SART1, SRFBP1, SRSF12]
GO:0000422	mitochondrion degradation	3	30	0.0274039	[C12orf5, FIS1, PINK1]
GO:0000724	double-strand break repair via homologous recombination	12	15.5844	0.00633807	[AP5S1, BRCA2, HUS1, MDC1, NABP1, PARPBP, RBBP8, SFR1, SLX4, SMC5, YY1, ZSWIM7]
GO:0000725	recombinational repair	13	16.6667	0.00252126	[AP5S1, BRCA2, HUS1, MDC1, NABP1, PARPBP, RBBP8, RHNO1, SFR1, SLX4, SMC5, YY1, ZSWIM7]
GO:0000726	non-recombinational repair	5	20	0.0260903	[LIG3, RBBP8, SLX4, SMC5, XRCC4]
GO:0001101	response to acid	32	11.0727	0.00564415	[ABCA1, ABCC2, ACSL1, ANXA2, ASIC1, BAD, BAX, CPT1A, CYBA, EDN1, FZR1, GDAP1, GPX1, GSS, KMT2E, LAMTOR2, LAMTOR4, LANCL2, NME1, PDGFD, PDK3, PIK3C3, PTK2B, S100A10, SERPINF1, SOCS1, SP100, TMEM161A, TNNC1, TRIM16, YY1, ZNF35]
GO:0001514	selenocysteine incorporation	3	50	0.00562817	[PSTK, SELT, TRNAU1AP]
GO:0001569	patterning of blood vessels	7	17.0732	0.0210705	[BAK1, BAX, EDN1, GNA13, LRP5, NFATC4, PLXND1]
GO:0001731	formation of translation preinitiation complex	5	29.4118	0.00480758	[EIF3D, EIF3F, EIF3K, RPL13A, TICRR]
GO:0001836	release of cytochrome c from mitochondria	12	19.6721	8.299581256763324E-4	[ATP7A, BAD, BAK1, BAX, BBC3, BID, CASP7, FIS1, GPX1, PINK1, PLA2G6, REXO2]
GO:0002066	columnar/cuboidal epithelial cell development	6	20	0.0152619	[ARNTL, BAD, BMP5, FZR1, RFX3, SMOX]
GO:0002068	glandular epithelial cell development	5	26.3158	0.00804922	[ARNTL, BAD, BMP5, RFX3, SMOX]
GO:0002076	osteoblast development	4	21.0526	0.0382476	[ACHE, HDAC5, JUND, LRP5]
GO:0003309	type B pancreatic cell differentiation	5	22.7273	0.015345	[ARNTL, BAD, BMP5, RFX3, SMOX]
GO:0003323	type B pancreatic cell development	5	29.4118	0.00480758	[ARNTL, BAD, BMP5, RFX3, SMOX]
GO:0003333	amino acid transmembrane transport	4	21.0526	0.0382476	[ACACA, CPT1A, SLC38A1, SLC6A8]
GO:0006139	nucleobase-containing compound metabolic process	445	7.5706	0.0067771	[AATF, ABCA1, ABHD14B, ACACA, ACAP2, ACD, ACHE, ACVRL1, ADK, AFMID, AGO2, AIMP1, AK1, AK9, ANKRD1, AP5S1, APOBEC3C, ARAP1, ARHGEF19, ARHGEF3, ARL2, ARNTL, ARRB1, ASXL2, ATL3, ATP5A1, ATP6V0D1, ATP6V1F, ATR, ATXN1, ATXN7, BAD, BAX, BEX1, BLOC1S2, BMP5, BNC2, BRCA2, BRMS1L, BTG2, C1orf85, CAMK4, CAPN5, CBY1, CCDC106, CCRN4L, CDC14B, CDC42EP2, CECR1, CELF5, CENPI, CENPK, CENPP, CEP164, CEP290, CHCHD…
GO:0006166	purine ribonucleoside salvage	3	60	0.00296643	[ADK, HPRT1, PRTFDC1]
GO:0006259	DNA metabolic process	95	9.25024	0.00199541	[ACD, ACHE, ACVRL1, ANKRD1, AP5S1, APOBEC3C, ARRB1, ATR, BAX, BMP5, BRCA2, BTG2, CDC14B, CENPI, CENPK, CENPP, CEP164, CHD8, CHEK2, CRY2, CTC1, DDB2, DEPDC1B, DSCC1, E2F8, EME1, ESCO2, EXOSC4, FANCB, FZR1, GADD45A, GINS3, GTF2H2, H1F0, HELB, HELLS, HEMK1, HIST1H2BH, HIST1H2BK, HIST2H2BE, HUS1, ING4, INO80C, INO80D, ITGB3BP, KAT5, KAT6B, KIAA0430, KMT2E, LIG3, MDC1, MMAB, MPHOSPH8, NABP1, NAP1L3, N…
GO:0006275	regulation of DNA replication	18	14.4	0.00235557	[ACD, ACVRL1, ATR, BMP5, BRCA2, CHEK2, CTC1, DSCC1, E2F8, ESCO2, HUS1, MMAB, S100A11, SMC1A, TGFB1, TICRR, TINF2, TSPYL2]
GO:0006281	DNA repair	49	10.6987	0.00152131	[AP5S1, ATR, BRCA2, BTG2, CDC14B, CEP164, CHEK2, CRY2, DDB2, DEPDC1B, EME1, FANCB, FZR1, GADD45A, GTF2H2, HUS1, INO80C, INO80D, KAT5, KIAA0430, LIG3, MDC1, MMAB, NABP1, NSMCE1, NTHL1, PAPD7, PARP4, PARPBP, POLD4, POLR2H, PRIMPOL, RBBP8, RFC5, RHNO1, RPS27L, SFR1, SLX4, SMC1A, SMC5, TFPT, TICRR, TMEM161A, TTC5, UVSSA, WRN, XRCC4, YY1, ZSWIM7]
GO:0006302	double-strand break repair	20	13.7931	0.00234958	[AP5S1, BRCA2, CHEK2, DEPDC1B, HUS1, KAT5, KIAA0430, LIG3, MDC1, NABP1, PAPD7, PARPBP, RBBP8, SFR1, SLX4, SMC5, WRN, XRCC4, YY1, ZSWIM7]
GO:0006304	DNA modification	10	12.5	0.0485206	[APOBEC3C, EXOSC4, HELLS, HEMK1, KMT2E, MPHOSPH8, NTHL1, TDRKH, TET2, TET3]
GO:0006310	DNA recombination	26	10.1961	0.030211	[AP5S1, BRCA2, EME1, HUS1, INO80C, INO80D, LIG3, MDC1, NABP1, NSMCE1, PARPBP, POLD4, RBBP8, RFC5, RHNO1, SFR1, SLX4, SMC1A, SMC5, TFPT, TGFB1, THAP9, WRN, XRCC4, YY1, ZSWIM7]
GO:0006355	regulation of transcription, DNA-templated	242	7.66065	0.0362019	[AATF, ABHD14B, ACVRL1, AGO2, ANKRD1, ARNTL, ARRB1, ASXL2, ATXN1, ATXN7, BEX1, BLOC1S2, BMP5, BNC2, BRCA2, BRMS1L, C1orf85, CAMK4, CAPN5, CBY1, CCDC106, CCRN4L, CENPK, CEP290, CHD6, CHD8, CHEK2, CHRD, CRABP2, CREBRF, CRY2, CSDC2, CUX2, DDX58, DKK3, DXO, DYRK1B, E2F8, EBF4, EDN1, EDNRB, EIF2AK2, ELK4, ELL2, ELOF1, EPAS1, EPHA5, ERBB4, ESF1, FHL2, FOSL1, FOXB1, FZR1, GABPA, GABPB1, HCFC2, HDAC5, HE…
GO:0006383	transcription from RNA polymerase III promoter	9	15.5172	0.0173744	[CHD8, POLR1C, POLR2H, POLR3B, POLR3G, SNAPC1, SNAPC4, SNAPC5, ZNF76]
GO:0006385	transcription elongation from RNA polymerase III promoter	4	22.2222	0.0318901	[POLR1C, POLR2H, POLR3B, POLR3G]
GO:0006386	termination of RNA polymerase III transcription	4	22.2222	0.0318901	[POLR1C, POLR2H, POLR3B, POLR3G]
GO:0006402	mRNA catabolic process	22	10.2804	0.0402674	[AGO2, BTG2, CCRN4L, CTIF, DXO, EIF4A2, EXOSC4, HSPA1A, HSPA1B, NCBP1, NCBP2, PAN2, PPP2R2A, RPL13A, RPL17, RPL27A, RPS10, RPS13, TOB1, WIBG, ZFP36, ZHX2]
GO:0006413	translational initiation	19	11.1111	0.0274263	[AGO2, CTIF, EIF1B, EIF2AK2, EIF2B5, EIF3D, EIF3F, EIF3K, EIF4A2, NCBP1, NCBP2, RPL13A, RPL17, RPL27A, RPS10, RPS13, TICRR, TRMT6, UHMK1]
GO:0006417	regulation of translation	29	11.7886	0.00339646	[AGO2, AIFM2, BTG2, CIRBP, CPEB2, CTIF, EIF1B, EIF2AK2, EIF2B5, EIF3D, EIF3F, EIF3K, EIF4A2, MTRF1, NCBP1, NCBP2, PSTK, PTK2B, RPL13A, RPS27L, SARNP, SELT, TOB1, TRMT6, TRNAU1AP, UHMK1, WIBG, YBX3, ZFP36]
GO:0006446	regulation of translational initiation	14	20	2.6304498291181036E-4	[AGO2, CTIF, EIF1B, EIF2AK2, EIF2B5, EIF3D, EIF3F, EIF3K, EIF4A2, NCBP1, NCBP2, RPL13A, TRMT6, UHMK1]
GO:0006451	translational readthrough	3	50	0.00562817	[PSTK, SELT, TRNAU1AP]
GO:0006461	protein complex assembly	94	8.34813	0.0306657	[ACACA, ACHE, ACVRL1, ANGPTL4, ANXA2, ARL2, ASIC1, ATL3, ATPAF1, BAD, BAX, BBC3, BID, CADPS2, CCDC88C, CD74, CDC42EP2, CDC42EP5, CENPC, CENPE, CENPI, CENPK, CENPP, CHEK2, CORO1A, COX14, CPT1A, CUTC, CYBA, DCXR, DGKH, EIF2AK2, FIS1, FZR1, GFPT1, H1F0, HAUS1, HAUS4, HAUS7, HIST1H2BH, HIST1H2BK, HIST2H2BE, HPRT1, ITGB3BP, KANK1, KAT6B, KCND1, KCNJ2, KCTD1, KCTD17, KCTD18, KCTD2, KCTD21, KCTD7, KIF14…
GO:0006464	cellular protein modification process	219	7.74125	0.0317081	[ABCA1, ACD, ACSL1, ACVRL1, AGBL5, AGTPBP1, AKT1S1, ALG10, ALG10B, ALG6, ALG9, ANAPC13, ANXA2, ARRB1, ARRDC4, ARSE, ARSK, ATP6V0D1, ATP7A, ATR, ATXN7, B3GNT1, B3GNT9, B4GALT6, B4GALT7, BAK1, BAX, BMP5, BRCA2, BRMS1L, BTG2, C5, CAMK2G, CAMK4, CCDC126, CCDC88C, CD74, CDC14B, CDC25B, CDC37, CENPE, CHEK2, CHML, COPS7A, COQ7, CRY2, DCAF17, DCN, DDB2, DEPDC1B, DSCC1, DTX3, DUSP14, DUSP8, DYRK1B, DYRK3,…
GO:0006488	dolichol-linked oligosaccharide biosynthetic process	7	19.4444	0.0105475	[ALG10, ALG10B, ALG6, ALG9, GFPT1, MPDU1, MPI]
GO:0006518	peptide metabolic process	14	13.4615	0.0122278	[ACD, CLN5, GPX1, GSS, GSTA4, GSTM3, GSTT1, HAGH, LTA4H, MRPS26, MRPS28, SEC11C, THOP1, TPP1]
GO:0006544	glycine metabolic process	4	21.0526	0.0382476	[AMT, DHFRL1, FAM206A, GCAT]
GO:0006598	polyamine catabolic process	3	37.5	0.0141904	[SAT1, SLC38A1, SMOX]
GO:0006643	membrane lipid metabolic process	20	11.5607	0.0163737	[ARSE, ARSK, BAX, CERS4, CERS5, CTSA, GBA, GM2A, LARGE, PGAP2, PIGM, PIGN, PIGT, PLA2G6, PPAP2A, PRKCD, SERAC1, SGMS1, SGPP1, ST6GALNAC4]
GO:0006664	glycolipid metabolic process	14	12.963	0.0166715	[ARSE, ARSK, BAX, CTSA, GBA, GM2A, LARGE, PGAP2, PIGM, PIGN, PIGT, PRKCD, SERAC1, ST6GALNAC4]
GO:0006725	cellular aromatic compound metabolic process	459	7.56178	0.0061789	[AATF, ABCA1, ABCB6, ABHD14B, ACACA, ACAP2, ACD, ACHE, ACVRL1, ADK, AFMID, AGO2, AIFM2, AIMP1, AK1, AK9, ANKRD1, AP5S1, APOBEC3C, ARAP1, ARHGEF19, ARHGEF3, ARL2, ARNTL, ARRB1, ASXL2, ATL3, ATP5A1, ATP6V0D1, ATP6V1F, ATP7A, ATR, ATXN1, ATXN7, BAD, BAX, BEX1, BLOC1S2, BMP5, BNC2, BRCA2, BRMS1L, BTG2, C1orf85, CAMK4, CAPN5, CBY1, CCDC106, CCRN4L, CDC14B, CDC42EP2, CECR1, CELF5, CENPI, CENPK, CENPP, …
GO:0006743	ubiquinone metabolic process	3	25	0.045315	[ADCK3, COQ2, COQ7]
GO:0006744	ubiquinone biosynthetic process	3	27.2727	0.0357819	[ADCK3, COQ2, COQ7]
GO:0006777	Mo-molybdopterin cofactor biosynthetic process	3	42.8571	0.00934536	[FLAD1, MOCS1, NFS1]
GO:0006801	superoxide metabolic process	7	14.5833	0.0455931	[AATF, AIFM2, ATP7A, CYBA, EDN1, PRKCD, TGFB1]
GO:0006839	mitochondrial transport	19	10.5556	0.0430706	[ACACA, ATP5A1, BAD, BAK1, BAX, BBC3, BID, BLOC1S2, CPT1A, FIS1, GDAP1, MTX1, REXO2, SLC25A37, SLC25A6, THEM4, TIMM13, TOMM6, TSPO]
GO:0006862	nucleotide transport	4	22.2222	0.0318901	[SLC25A42, SLC25A6, SLC35A3, SLC35B2]
GO:0006974	cellular response to DNA damage stimulus	80	10.7383	5.035109916992619E-5	[AATF, ACD, ANKRD1, AP5S1, ATAD5, ATR, BAD, BAK1, BAX, BBC3, BID, BRCA2, BTG2, CD74, CDC14B, CDIP1, CEP164, CHEK2, CRADD, CRY2, CTC1, DDB2, DEPDC1B, EME1, FANCB, FZR1, GADD45A, GTF2H2, HUS1, ING4, INO80C, INO80D, KAT5, KIAA0430, LIG3, MAP2K6, MDC1, MMAB, MRPS26, MRPS28, MYO6, NABP1, NDRG1, NFATC4, NSMCE1, NTHL1, PAPD7, PARP4, PARPBP, PGAP2, PHLDA3, PIAS4, POLD4, POLR2H, PRIMPOL, PRKCD, PSMB10, RB…
GO:0006978	DNA damage response, signal transduction by p53 class mediator resulting in transcription of p21 class mediator	4	26.6667	0.0167736	[BRCA2, ING4, KAT5, SP100]
GO:0006996	organelle organization	225	8.19971	0.00232905	[ABCA1, ACD, AGTPBP1, AIFM2, ANAPC13, ANAPC15, ANKRD1, ANXA2, ARAP1, ARHGEF19, ARL2, ARRB1, ATL3, ATP6V0A1, ATP6V0D1, ATP6V1F, ATP7A, ATXN7, B9D2, BAD, BAK1, BAX, BBC3, BID, BLOC1S2, BLOC1S3, BLOC1S6, BORA, BRCA2, C2CD3, CASP7, CBY1, CCRN4L, CDC25B, CDC42EP2, CDC42EP5, CDCA2, CENPC, CENPE, CENPI, CENPK, CENPP, CEP164, CEP290, CEP55, CEP57L1, CEP68, CETN3, CHD6, CHD8, CHEK2, CIRBP, CLN5, COPZ1, CO…
GO:0007005	mitochondrion organization	40	12.1212	3.7272567164383443E-4	[AGTPBP1, AIFM2, ATP7A, BAD, BAK1, BAX, BBC3, BID, BLOC1S2, CASP7, COQ7, COX14, DARS2, DHODH, EPAS1, ERBB4, FIS1, GDAP1, GPX1, HK2, LIG3, MTFR2, MTO1, MTX1, NDUFAF7, NDUFS7, NDUFS8, OXA1L, PINK1, PLA2G6, PRIMPOL, REXO2, SLC25A6, TFAM, THEM4, TIMM13, TOMM6, TSPO, TTC19, VAT1]
GO:0007040	lysosome organization	6	16.2162	0.0397333	[ABCA1, ACD, CLN5, GNPTAB, LYST, TPP1]
GO:0007049	cell cycle	142	8.72236	0.00184823	[AATF, AK1, ANAPC13, ANAPC15, APPL1, ARAP1, ARL2, ARNTL, ATR, B9D2, BAD, BAK1, BAX, BEX1, BID, BORA, BRCA2, CAB39L, CAMK2G, CCNDBP1, CDC14A, CDC14B, CDC25B, CDC37, CDCA2, CENPC, CENPE, CENPI, CENPK, CENPP, CEP164, CEP290, CEP55, CETN3, CGRRF1, CHEK2, CRADD, CROCC, CSPP1, CTC1, DEPDC1B, DSCC1, E2F8, EDN1, ESCO2, FOSL1, FSD1, FZR1, GADD45A, GAK, GAS2L3, GPSM2, HAUS1, HAUS4, HAUS7, HELLS, HEXIM1, HU…
GO:0007064	mitotic sister chromatid cohesion	3	25	0.045315	[DSCC1, SMC1A, SMC5]
GO:0007067	mitosis	44	11.6095	4.987655224811928E-4	[ANAPC13, ANAPC15, BORA, CDC25B, CDCA2, CENPC, CENPE, CEP164, CEP55, CETN3, CHEK2, DSCC1, EDN1, FSD1, FZR1, HAUS1, HAUS4, HAUS7, HELLS, IL1A, ITGB3BP, KIF18A, KIF23, LATS2, LRP5, LRRCC1, MAPRE3, NCAPG, NUP37, OIP5, PAPD7, PRMT5, RBBP8, SIRT7, SMC1A, SMC5, SNX18, STAG1, TADA3, TGFB1, TOM1L1, TTK, USP37, ZC3HC1]
GO:0007519	skeletal muscle tissue development	19	11.0465	0.0289137	[ANKRD1, ANKRD52, ARNTL, BTG2, DCN, EPAS1, FBXO22, GPX1, HDAC5, MBNL3, MEGF10, MYOCD, NR1D2, SLC25A37, TGFB1, TSC22D3, UQCC2, USP19, YBX3]
GO:0007568	aging	27	11.157	0.00946119	[ARNTL, ATR, BAK1, BBC3, BRCA2, CASP7, CHEK2, COQ7, CTC1, CTSC, DCN, EDN1, EDNRB, FZR1, GPX1, GSS, HYAL2, INPP5D, JUND, MMAB, PRKCD, SERPINF1, SMC5, TGFB1, TSPO, ULK3, WRN]
GO:0007569	cell aging	11	12.0879	0.0489081	[ARNTL, ATR, BRCA2, CHEK2, CTC1, FZR1, MMAB, PRKCD, SMC5, ULK3, WRN]
GO:0008053	mitochondrial fusion	4	20	0.0452765	[BAK1, BAX, FIS1, VAT1]
GO:0008104	protein localization	150	8.02568	0.0261478	[AAGAB, ABCA1, ACAP2, ACD, ACHE, ANKRD1, ANXA2, AP1S1, AP3B2, AP4B1, AP4E1, AP4M1, AP5S1, APPBP2, APPL1, ARHGAP33, ARL2, ARNTL, ARRB1, ASTN2, ATP6V0A1, ATP6V0D1, ATP6V1F, BAD, BAX, BBC3, BID, BLOC1S3, BLOC1S6, BORA, BTN3A1, C5, CADPS2, CAMK4, CARD8, CBY1, CCDC91, CD74, CDC37, CEP112, CEP290, CEP55, CEP57L1, CHML, COPZ1, CREBRF, CROCC, CRY2, CTSA, CUBN, DACT3, DDX58, EHD2, ERBB4, FIS1, FZR1, GDAP1…
GO:0008156	negative regulation of DNA replication	11	26.1905	9.588057811714261E-5	[ACD, ATR, BRCA2, CHEK2, HUS1, MMAB, S100A11, SMC1A, TGFB1, TINF2, TSPYL2]
GO:0008630	intrinsic apoptotic signaling pathway in response to DNA damage	14	11.9658	0.0310662	[BAD, BAK1, BAX, BRCA2, CD74, CDIP1, CHEK2, NFATC4, PGAP2, PHLDA3, PIAS4, REXO2, RPS27L, TMEM161A]
GO:0008635	activation of cysteine-type endopeptidase activity involved in apoptotic process by cytochrome c	3	37.5	0.0141904	[BAK1, BAX, CASP7]
GO:0008637	apoptotic mitochondrial changes	17	13.4921	0.00602091	[AIFM2, ATP7A, BAD, BAK1, BAX, BBC3, BID, BLOC1S2, CASP7, ERBB4, FIS1, GPX1, HK2, PINK1, PLA2G6, REXO2, THEM4]
GO:0009059	macromolecule biosynthetic process	363	7.74813	0.00423787	[AATF, ABCA1, ABCC5, ABHD14B, ACD, ACHE, ACVRL1, AGO2, AIFM2, AIMP1, ALG10, ALG10B, ALG6, ALG9, ANKRD1, ARNTL, ARRB1, ASXL2, ATP7A, ATR, ATXN1, ATXN7, B3GNT1, B3GNT9, B4GALT6, B4GALT7, BEX1, BLOC1S2, BMP5, BNC2, BRCA2, BRMS1L, BTG2, C1orf85, CAMK4, CAPN5, CBY1, CCDC106, CCDC126, CCRN4L, CENPK, CEP290, CERCAM, CHD6, CHD8, CHEK2, CHRD, CIRBP, CPEB2, CRABP2, CREBRF, CRY2, CSDC2, CTC1, CTIF, CUX2, DA…
GO:0009108	coenzyme biosynthetic process	17	14.6552	0.00254459	[ACACA, ACSL1, ACSL4, ADCK3, AFMID, COQ2, COQ7, DHFRL1, FLAD1, MOCS1, NFS1, NMNAT2, PCBD1, PCBD2, PDK2, PDK3, RFK]
GO:0009135	purine nucleoside diphosphate metabolic process	3	30	0.0274039	[AK9, BAD, NUDT9]
GO:0009163	nucleoside biosynthetic process	16	12.6984	0.0132427	[ACACA, ADK, AK9, ATP5A1, CECR1, CHCHD10, DHFRL1, DHODH, DPYD, HPRT1, NME1, PRTFDC1, QTRT1, SLC35B2, SLC35B3, TGFB1]
GO:0009179	purine ribonucleoside diphosphate metabolic process	3	30	0.0274039	[AK9, BAD, NUDT9]
GO:0009202	deoxyribonucleoside triphosphate biosynthetic process	3	60	0.00296643	[ADK, AK9, TBPL1]
GO:0009306	protein secretion	21	10.1449	0.0498325	[ABCA1, ACHE, ANKRD1, BLOC1S3, BLOC1S6, BTN3A1, C5, CARD8, GNPTAB, HYAL2, IL1A, LTBP2, LYST, NLRP2, OLFM2, PIK3C3, S100A13, TGFB1, TRAF3IP2, TRIM16, TRIM27]
GO:0009310	amine catabolic process	4	21.0526	0.0382476	[AFMID, SAT1, SLC38A1, SMOX]
GO:0009409	response to cold	6	16.2162	0.0397333	[CDH8, CIRBP, PCSK1N, SLC27A1, TRPA1, YBX3]
GO:0009411	response to UV	19	15.7025	6.267969914431114E-4	[ATR, BAK1, BAX, BRCA2, CASP7, CIRBP, DDB2, GPX1, GTF2H2, HUS1, HYAL2, MMAB, NFATC4, PRIMPOL, RHNO1, TMEM161A, UVSSA, WRN, YY1]
GO:0009416	response to light stimulus	32	9.38416	0.0483481	[ARRB1, ATR, ATXN1, BAK1, BAX, BRCA2, CASP7, CHEK2, CIRBP, CRY2, DDB2, FOXB1, GPX1, GTF2H2, HUS1, HYAL2, JUNB, JUND, MMAB, NFATC4, NMU, PLEKHB1, PRIMPOL, RBP1, RHNO1, RSC1A1, SDC4, SLC24A1, TMEM161A, UVSSA, WRN, YY1]
GO:0009612	response to mechanical stimulus	19	10.6742	0.0391377	[ANKRD1, BAD, BAK1, BTG2, CRADD, CYBA, DCN, DENND5B, FOSL1, GADD45A, GRIN2B, JUNB, JUND, KCNJ2, NRXN2, PTK2B, TNNC1, TRPA1, TXNIP]
GO:0009743	response to carbohydrate	20	11.4943	0.0173414	[ARRB1, BAD, CYBA, EIF2B5, EPHA5, GFPT1, GPX1, LRP5, MAP2K6, NME1, PDK3, PFKFB2, PHPT1, PLA2G6, PTK2B, SLC29A1, SLC37A4, TGFB1, TXN2, TXNIP]
GO:0009746	response to hexose	18	12.2449	0.0128199	[ARRB1, BAD, CYBA, EIF2B5, EPHA5, GPX1, LRP5, NME1, PDK3, PFKFB2, PHPT1, PLA2G6, PTK2B, SLC29A1, SLC37A4, TGFB1, TXN2, TXNIP]
GO:0009749	response to glucose	18	12.766	0.00849861	[ARRB1, BAD, CYBA, EIF2B5, EPHA5, GPX1, LRP5, NME1, PDK3, PFKFB2, PHPT1, PLA2G6, PTK2B, SLC29A1, SLC37A4, TGFB1, TXN2, TXNIP]
GO:0009889	regulation of biosynthetic process	296	7.86189	0.0051667	[AATF, ABCA1, ABHD14B, ACD, ACVRL1, AGO2, AIFM2, ANKRD1, ARNTL, ARRB1, ASXL2, ATR, ATXN1, ATXN7, BEX1, BLOC1S2, BMP5, BNC2, BRCA2, BRMS1L, BTG2, C1orf85, CAMK4, CAPN5, CBY1, CCDC106, CCRN4L, CENPK, CEP290, CHD6, CHD8, CHEK2, CHRD, CIRBP, CPEB2, CRABP2, CREBRF, CRY2, CSDC2, CTC1, CTIF, CUX2, DDX58, DKK3, DSCC1, DXO, DYRK1B, E2F8, EBF4, EDN1, EDNRB, EHHADH, EIF1B, EIF2AK2, EIF2B5, EIF3D, EIF3F, EIF…
GO:0010212	response to ionizing radiation	17	12.0567	0.0175947	[ATR, BAK1, BAX, BRCA2, CHEK2, CYBA, DEPDC1B, GADD45A, GPX1, HUS1, KAT5, MMAB, NABP1, RHNO1, TICRR, WRN, XRCC4]
GO:0010225	response to UV-C	4	33.3333	0.00718243	[BAK1, BRCA2, WRN, YY1]
GO:0010257	NADH dehydrogenase complex assembly	4	23.5294	0.0261996	[NDUFAF7, NDUFS7, NDUFS8, OXA1L]
GO:0010259	multicellular organismal aging	6	19.3548	0.0178474	[BBC3, COQ7, EDN1, HYAL2, INPP5D, WRN]
GO:0010332	response to gamma radiation	10	22.2222	8.248302274852647E-4	[ATR, BAK1, BAX, BRCA2, CHEK2, CYBA, GPX1, MMAB, WRN, XRCC4]
GO:0010390	histone monoubiquitination	4	20	0.0452765	[PCGF1, PEX2, RING1, RYBP]
GO:0010468	regulation of gene expression	309	8.00726	0.0013173	[AATF, ABHD14B, ACVRL1, ADK, AGO2, AIFM2, ANKRD1, APOBEC3C, ARNTL, ARRB1, ASXL2, ATP7A, ATXN1, ATXN7, BAD, BAK1, BEX1, BLOC1S2, BMP5, BNC2, BRCA2, BRMS1L, BTG2, C1orf85, C2CD3, C5, CAMK4, CAPN5, CBY1, CCDC106, CCDC88C, CCRN4L, CENPK, CEP290, CHD6, CHD8, CHEK2, CHRD, CIRBP, COQ7, CPEB2, CPSF4, CRABP2, CREBRF, CRY2, CSDC2, CTIF, CUX2, CWC22, DDX58, DKK3, DSC2, DXO, DYRK1B, E2F8, EBF4, EDN1, EDNRB, …
GO:0010556	regulation of macromolecule biosynthetic process	290	8.14378	6.809625756715086E-4	[AATF, ABHD14B, ACD, ACVRL1, AGO2, AIFM2, ANKRD1, ARNTL, ARRB1, ASXL2, ATR, ATXN1, ATXN7, BEX1, BLOC1S2, BMP5, BNC2, BRCA2, BRMS1L, BTG2, C1orf85, CAMK4, CAPN5, CBY1, CCDC106, CCRN4L, CENPK, CEP290, CHD6, CHD8, CHEK2, CHRD, CIRBP, CPEB2, CRABP2, CREBRF, CRY2, CSDC2, CTC1, CTIF, CUX2, DDX58, DKK3, DSCC1, DXO, DYRK1B, E2F8, EBF4, EDN1, EDNRB, EHHADH, EIF1B, EIF2AK2, EIF2B5, EIF3D, EIF3F, EIF3K, EIF…
GO:0010558	negative regulation of macromolecule biosynthetic process	91	8.36397	0.0317604	[AATF, ACD, ACVRL1, AGO2, AIFM2, ANKRD1, ATR, ATXN1, BRCA2, BRMS1L, BTG2, CBY1, CHD8, CHEK2, CPEB2, CREBRF, CRY2, CUX2, DKK3, E2F8, EDN1, EDNRB, EIF2AK2, EIF2B5, ELK4, FHL2, FOXB1, GABPA, GFPT1, HCFC2, HDAC5, HELLS, HEXIM1, HUS1, IGBP1, ING4, INPP5D, KAT5, KAT6B, KCTD1, KDM5B, KLF12, LANCL2, LPPR2, MAP3K10, MDFIC, MMAB, MPHOSPH8, MXD4, NKRF, NR1D2, PAWR, PER3, PEX2, PHF19, PIAS4, PRMT2, PRMT5, RB…
GO:0010608	posttranscriptional regulation of gene expression	42	9.83606	0.0132301	[AGO2, AIFM2, BTG2, CCDC88C, CHEK2, CIRBP, CPEB2, CTIF, DSC2, DXO, EIF1B, EIF2AK2, EIF2B5, EIF3D, EIF3F, EIF3K, EIF4A2, HEXIM1, ISOC2, MTRF1, NCBP1, NCBP2, PEX2, PRKCD, PSTK, PTK2B, RPL13A, RPS27L, SARNP, SELT, SIAH1, SMOX, TADA3, TOB1, TRMT6, TRNAU1AP, UHMK1, USP19, WIBG, YBX3, ZFP36, ZSWIM7]
GO:0010638	positive regulation of organelle organization	31	10.1307	0.0209578	[ANXA2, ARL2, ARRB1, BAD, BAK1, BAX, BBC3, BID, CDC42EP2, CDC42EP5, CORO1A, EDN1, FIS1, IL1A, LIF, LRP5, LRRC16A, PAK1, PHF19, PINK1, PLA2G6, PTK2B, REXO2, S100A10, SDC4, SMC5, TGFB1, TINF2, WASH1, WASH2P, WASH3P]
GO:0010821	regulation of mitochondrion organization	12	12.2449	0.037564	[BAD, BAK1, BAX, BBC3, BID, DHODH, FIS1, GPX1, PINK1, PLA2G6, REXO2, VAT1]
GO:0010822	positive regulation of mitochondrion organization	9	15	0.0213436	[BAD, BAK1, BAX, BBC3, BID, FIS1, PINK1, PLA2G6, REXO2]
GO:0010942	positive regulation of cell death	41	9.53488	0.0226659	[AATF, AIFM2, ANKRD1, APPL1, ARHGEF3, ARRB1, BAD, BAK1, BAX, BBC3, BID, BRMS1L, C12orf5, CASP7, CD248, DHODH, FOSL1, FRZB, GADD45A, ING4, INPP5D, ITGB3BP, LPAR1, MAP2K6, MAP3K10, MAP3K9, NFATC4, OBSCN, PAWR, PDCD7, PHLDA3, PIAS4, PNMA1, PRMT2, SIAH1, TFPT, TGFB1, TNFRSF12A, TSPO, TXNIP, UNC5B]
GO:0015031	protein transport	117	8.18182	0.0290631	[AAGAB, ABCA1, ACD, ACHE, ANKRD1, ANXA2, AP1S1, AP3B2, AP4B1, AP4E1, AP4M1, AP5S1, APPBP2, ARHGAP33, ARNTL, ARRB1, ATP6V0A1, ATP6V0D1, ATP6V1F, BID, BLOC1S3, BLOC1S6, BTN3A1, C5, CADPS2, CAMK4, CARD8, CCDC91, CD74, CDC37, CEP290, CHML, COPZ1, CREBRF, CRY2, CTSA, CUBN, DACT3, DDX58, ERBB4, FIS1, FZR1, GDAP1, GLE1, GNPTAB, GOLGA1, HYAL2, IL1A, KANK1, KIF13B, KIF18A, LMAN2L, LTBP2, LYST, MDFIC, MTX1…
GO:0015748	organophosphate ester transport	9	13.2353	0.0437496	[ABCA1, ATP10A, NPC2, PRKCD, SLC25A42, SLC25A6, SLC35A3, SLC35B2, SLC37A4]
GO:0015858	nucleoside transport	4	26.6667	0.0167736	[SLC25A42, SLC25A6, SLC29A1, SLC35B2]
GO:0015865	purine nucleotide transport	3	33.3333	0.0202047	[SLC25A42, SLC25A6, SLC35B2]
GO:0015868	purine ribonucleotide transport	3	37.5	0.0141904	[SLC25A42, SLC25A6, SLC35B2]
GO:0016202	regulation of striated muscle tissue development	13	11.6071	0.0453815	[ARNTL, ERBB4, FBXO22, HDAC5, MBNL3, MEGF10, MYOCD, NR1D2, TGFB1, TSC22D3, UQCC2, USP19, YBX3]
GO:0016579	protein deubiquitination	13	14.7727	0.00726372	[ATXN7, DEPDC1B, EIF3F, OTUB2, OTUD4, OTUD5, OTULIN, SUPT3H, USP11, USP19, USP25, USP34, USP37]
GO:0018130	heterocycle biosynthetic process	310	7.70186	0.0128632	[AATF, ABCA1, ABCB6, ABHD14B, ACACA, ACVRL1, ADK, AFMID, AGO2, AIFM2, AK1, AK9, ANKRD1, ARNTL, ARRB1, ASXL2, ATP5A1, ATXN1, ATXN7, BEX1, BLOC1S2, BMP5, BNC2, BRCA2, BRMS1L, C1orf85, CAMK4, CAPN5, CBY1, CCDC106, CCRN4L, CECR1, CENPK, CEP290, CHCHD10, CHD6, CHD8, CHEK2, CHRD, CRABP2, CREBRF, CRY2, CSDC2, CUX2, DDX58, DHFRL1, DHODH, DKK3, DPYD, DXO, DYRK1B, E2F8, EBF4, EDN1, EDNRB, EIF2AK2, ELK4, EL…
GO:0019048	modulation by virus of host morphology or physiology	6	22.2222	0.00907657	[BAD, CPSF4, EIF2AK2, HYAL2, SLC25A6, TGFB1]
GO:0019054	modulation by virus of host process	5	50	2.943042324059921E-4	[BAD, CPSF4, EIF2AK2, SLC25A6, TGFB1]
GO:0019219	regulation of nucleobase-containing compound metabolic process	302	7.70605	0.0138596	[AATF, ABCA1, ABHD14B, ACAP2, ACD, ACVRL1, AGO2, ANKRD1, ARAP1, ARHGEF19, ARHGEF3, ARL2, ARNTL, ARRB1, ASXL2, ATP6V0D1, ATR, ATXN1, ATXN7, BAX, BEX1, BLOC1S2, BMP5, BNC2, BRCA2, BRMS1L, BTG2, C1orf85, CAMK4, CAPN5, CBY1, CCDC106, CCRN4L, CDC42EP2, CENPK, CEP290, CHD6, CHD8, CHEK2, CHRD, COQ7, CPEB2, CPSF4, CRABP2, CREBRF, CRY2, CSDC2, CTC1, CUX2, CWC22, DDX58, DENND3, DENND5B, DEPDC1B, DKK3, DSCC…
GO:0019222	regulation of metabolic process	441	7.7929	6.645565248524927E-4	[AATF, ABCA1, ABHD14B, ACACA, ACAP2, ACD, ACHE, ACSL1, ACVRL1, ADK, AGO2, AIFM2, AKT1S1, ANGPTL4, ANKRD1, ANKRD26, ANXA2, APOBEC3C, ARAP1, ARHGEF19, ARHGEF3, ARL2, ARNTL, ARRB1, ARRDC4, ASXL2, ATP6V0D1, ATP7A, ATR, ATXN1, ATXN7, BAD, BAK1, BAX, BBC3, BEX1, BID, BLOC1S2, BMP5, BNC2, BRCA2, BRMS1L, BTG2, C12orf5, C1orf85, C2CD3, C5, CAMK4, CAPN5, CARD8, CASP7, CBY1, CCDC106, CCDC8, CCDC88C, CCRN4L,…
GO:0019438	aromatic compound biosynthetic process	310	7.69422	0.0135497	[AATF, ABCA1, ABCB6, ABHD14B, ACACA, ACVRL1, ADK, AFMID, AGO2, AIFM2, AK1, AK9, ANKRD1, ARNTL, ARRB1, ASXL2, ATP5A1, ATP7A, ATXN1, ATXN7, BEX1, BLOC1S2, BMP5, BNC2, BRCA2, BRMS1L, C1orf85, CAMK4, CAPN5, CBY1, CCDC106, CCRN4L, CECR1, CENPK, CEP290, CHCHD10, CHD6, CHD8, CHEK2, CHRD, CRABP2, CREBRF, CRY2, CSDC2, CUX2, DDX58, DHFRL1, DHODH, DKK3, DPYD, DXO, DYRK1B, E2F8, EBF4, EDN1, EDNRB, EIF2AK2, E…
GO:0019720	Mo-molybdopterin cofactor metabolic process	3	42.8571	0.00934536	[FLAD1, MOCS1, NFS1]
GO:0019751	polyol metabolic process	15	12.7119	0.0159808	[COQ2, DAK, GBA, GDPD1, GDPD2, INPP5D, IP6K3, ITPKB, NUDT9, PLCD1, PLCD3, PLCE1, PPIP5K1, PTK2B, SGPP1]
GO:0022402	cell cycle process	99	8.18182	0.0424845	[AK1, ANAPC13, ANAPC15, ARAP1, ATR, BID, BORA, BRCA2, CAB39L, CAMK2G, CDC14B, CDC25B, CDCA2, CENPC, CENPE, CEP164, CEP290, CEP55, CETN3, CGRRF1, CHEK2, CRADD, CSPP1, CTC1, DEPDC1B, DSCC1, E2F8, EDN1, FSD1, FZR1, GADD45A, GAS2L3, GPSM2, HAUS1, HAUS4, HAUS7, HELLS, HUS1, IL1A, ING4, ITGB3BP, KIF18A, KIF23, KIZ, KMT2E, LATS2, LIF, LIG3, LRP5, LRRCC1, MAP2K6, MAPRE3, MDC1, MMAB, MTBP, NABP1, NCAPG, N…
GO:0022607	cellular component assembly	159	8.31155	0.00672609	[ABCA1, ACACA, ACD, ACHE, ACVRL1, ANGPTL4, ANKRD1, ANXA2, ARAP1, ARL2, ARRB1, ASIC1, ATL3, ATP6V0D1, ATP7A, ATPAF1, B9D2, BAD, BAX, BBC3, BID, C2CD3, CADPS2, CBY1, CCDC88C, CCRN4L, CD74, CDC42EP2, CDC42EP5, CDH7, CDH8, CENPC, CENPE, CENPI, CENPK, CENPP, CEP164, CEP290, CHEK2, CIRBP, CORO1A, COX14, CPT1A, CTSD, CUTC, CUX2, CYBA, DCXR, DGKH, DZIP1, DZIP1L, EDN1, EFTUD1, EIF2AK2, EIF3D, EIF3F, EIF3K…
GO:0022618	ribonucleoprotein complex assembly	18	12.6761	0.00912334	[CCRN4L, CIRBP, EFTUD1, EIF3D, EIF3F, EIF3K, GEMIN8, HEXIM1, NCBP1, NCBP2, NUFIP1, PRMT5, RPL13A, SART1, SRFBP1, SRSF12, SRSF6, TICRR]
GO:0030148	sphingolipid biosynthetic process	9	14.0625	0.0311621	[CERS4, CERS5, GBA, LARGE, PLA2G6, PPAP2A, PRKCD, SGMS1, SGPP1]
GO:0030220	platelet formation	4	28.5714	0.0129992	[MFAP2, NBEAL2, VPS33A, ZFPM1]
GO:0031023	microtubule organizing center organization	12	14.2857	0.0125367	[ARL2, BRCA2, CEP68, CETN3, CROCC, GADD45A, HAUS1, HAUS4, HAUS7, SASS6, SSX2IP, TUBB4A]
GO:0031055	chromatin remodeling at centromere	6	18.75	0.0207177	[CENPI, CENPK, CENPP, HELLS, ITGB3BP, OIP5]
GO:0031124	mRNA 3'-end processing	12	12.2449	0.037564	[AGO2, BTG2, EIF4A2, HEXIM1, NCBP1, NCBP2, PAN2, PEX2, SRSF6, TOB1, ZFP36, ZNF473]
GO:0031323	regulation of cellular metabolic process	390	7.65006	0.00668939	[AATF, ABCA1, ABHD14B, ACACA, ACAP2, ACD, ACHE, ACSL1, ACVRL1, AGO2, AIFM2, AKT1S1, ANKRD1, ANKRD26, ANXA2, ARAP1, ARHGEF19, ARHGEF3, ARL2, ARNTL, ARRB1, ARRDC4, ASXL2, ATP6V0D1, ATP7A, ATR, ATXN1, ATXN7, BAD, BAK1, BAX, BEX1, BLOC1S2, BMP5, BNC2, BRCA2, BRMS1L, BTG2, C12orf5, C1orf85, C5, CAMK4, CAPN5, CBY1, CCDC106, CCDC8, CCDC88C, CCRN4L, CD74, CDC14B, CDC25B, CDC37, CDC42EP2, CENPE, CENPK, CE…
GO:0031326	regulation of cellular biosynthetic process	296	7.95699	0.0025651	[AATF, ABCA1, ABHD14B, ACD, ACVRL1, AGO2, AIFM2, ANKRD1, ARNTL, ARRB1, ASXL2, ATR, ATXN1, ATXN7, BEX1, BLOC1S2, BMP5, BNC2, BRCA2, BRMS1L, BTG2, C1orf85, CAMK4, CAPN5, CBY1, CCDC106, CCRN4L, CENPK, CEP290, CHD6, CHD8, CHEK2, CHRD, CIRBP, CPEB2, CRABP2, CREBRF, CRY2, CSDC2, CTC1, CTIF, CUX2, DDX58, DKK3, DSCC1, DXO, DYRK1B, E2F8, EBF4, EDN1, EDNRB, EHHADH, EIF1B, EIF2AK2, EIF2B5, EIF3D, EIF3F, EIF…
GO:0031327	negative regulation of cellular biosynthetic process	94	8.24561	0.04011	[AATF, ACD, ACVRL1, AGO2, AIFM2, ANKRD1, ATR, ATXN1, BMP5, BRCA2, BRMS1L, BTG2, CBY1, CHD8, CHEK2, CPEB2, CREBRF, CRY2, CUX2, DKK3, E2F8, EDN1, EDNRB, EIF2AK2, EIF2B5, ELK4, FHL2, FOXB1, GABPA, GFPT1, HCFC2, HDAC5, HELLS, HEXIM1, HUS1, IGBP1, ING4, INPP5D, KAT5, KAT6B, KCTD1, KDM5B, KLF12, LANCL2, LPPR2, MAP3K10, MDFIC, MMAB, MPHOSPH8, MXD4, NKRF, NR1D2, PAWR, PER3, PEX2, PHF19, PIAS4, PRMT2, PRM…
GO:0031440	regulation of mRNA 3'-end processing	6	31.5789	0.00133753	[AGO2, BTG2, NCBP1, PEX2, TOB1, ZFP36]
GO:0031442	positive regulation of mRNA 3'-end processing	6	35.2941	6.87634567320217E-4	[AGO2, BTG2, NCBP1, PEX2, TOB1, ZFP36]
GO:0031648	protein destabilization	4	21.0526	0.0382476	[CCDC88C, ISOC2, PEX2, SIAH1]
GO:0032261	purine nucleotide salvage	3	37.5	0.0141904	[ADK, HPRT1, PRTFDC1]
GO:0032287	peripheral nervous system myelin maintenance	3	42.8571	0.00934536	[MPP5, NDRG1, SH3TC2]
GO:0032324	molybdopterin cofactor biosynthetic process	3	42.8571	0.00934536	[FLAD1, MOCS1, NFS1]
GO:0032438	melanosome organization	4	21.0526	0.0382476	[BLOC1S2, BLOC1S3, BLOC1S6, LYST]
GO:0032570	response to progesterone	6	17.6471	0.027361	[BAD, FOSL1, JUNB, TGFB1, TSPO, TXNIP]
GO:0032774	RNA biosynthetic process	274	7.59845	0.0362715	[AATF, ABHD14B, ACVRL1, AGO2, ANKRD1, ARNTL, ARRB1, ASXL2, ATXN1, ATXN7, BEX1, BLOC1S2, BMP5, BNC2, BRCA2, BRMS1L, C1orf85, CAMK4, CAPN5, CBY1, CCDC106, CCRN4L, CENPK, CEP290, CHD6, CHD8, CHEK2, CHRD, CRABP2, CREBRF, CRY2, CSDC2, CUX2, DDX58, DKK3, DXO, DYRK1B, E2F8, EBF4, EDN1, EDNRB, EIF2AK2, ELK4, ELL2, ELOF1, EPAS1, EPHA5, ERBB4, ESF1, FHL2, FOSL1, FOXB1, FOXP4, FZR1, GABPA, GABPB1, GMEB1, GT…
GO:0032928	regulation of superoxide anion generation	3	27.2727	0.0357819	[AATF, PRKCD, TGFB1]
GO:0032981	mitochondrial respiratory chain complex I assembly	4	23.5294	0.0261996	[NDUFAF7, NDUFS7, NDUFS8, OXA1L]
GO:0033108	mitochondrial respiratory chain complex assembly	7	30.4348	6.80051154379998E-4	[COX14, NDUFAF7, NDUFS7, NDUFS8, OXA1L, TFAM, TTC19]
GO:0033299	secretion of lysosomal enzymes	3	42.8571	0.00934536	[BLOC1S3, BLOC1S6, LYST]
GO:0033363	secretory granule organization	4	25	0.0211662	[ABCA1, BLOC1S2, BLOC1S3, LYST]
GO:0033504	floor plate development	3	30	0.0274039	[CHRD, FOXB1, SMOX]
GO:0033554	cellular response to stress	128	8.79725	0.00230474	[AATF, ACD, ANKRD1, AP5S1, ARNTL, ATAD5, ATP6V0D1, ATP7A, ATR, BAD, BAK1, BAX, BBC3, BID, BRCA2, BTG2, C12orf5, CD74, CDC14B, CDC42EP5, CDIP1, CEP164, CHEK2, COQ7, CPEB2, CRADD, CREBRF, CRY2, CTC1, CTSD, DDB2, DEPDC1B, EDN1, EIF2AK2, EIF2B5, EME1, EPAS1, ERO1L, FANCB, FBXO22, FZR1, GADD45A, GFPT1, GPX1, GSTM3, GTF2H2, HIF3A, HUS1, IFT20, IGBP1, IL1A, ING4, INO80C, INO80D, KAT5, KIAA0430, LIG3, MA…
GO:0034284	response to monosaccharide	18	11.8421	0.0176074	[ARRB1, BAD, CYBA, EIF2B5, EPHA5, GPX1, LRP5, NME1, PDK3, PFKFB2, PHPT1, PLA2G6, PTK2B, SLC29A1, SLC37A4, TGFB1, TXN2, TXNIP]
GO:0034508	centromere complex assembly	8	18.1818	0.00970513	[CENPC, CENPE, CENPI, CENPK, CENPP, HELLS, ITGB3BP, OIP5]
GO:0034622	cellular macromolecular complex assembly	62	8.78187	0.0302159	[ARL2, CADPS2, CCRN4L, CDC42EP2, CDC42EP5, CENPC, CENPE, CENPI, CENPK, CENPP, CIRBP, CORO1A, COX14, CYBA, EFTUD1, EIF2AK2, EIF3D, EIF3F, EIF3K, GEMIN8, H1F0, HELLS, HEXIM1, HIST1H2BH, HIST1H2BK, HIST2H2BE, ITGB3BP, KANK1, KAT6B, KIF23, LRRC16A, MSRB1, NAP1L3, NAP1L5, NCAPG, NCBP1, NCBP2, NDUFAF7, NDUFS7, NDUFS8, NUFIP1, OIP5, OXA1L, PRKCD, PRMT5, PTK2B, RPL13A, SART1, SMAD6, SRFBP1, SRSF12, SRSF6…
GO:0034641	cellular nitrogen compound metabolic process	478	7.59453	0.00334073	[AATF, ABCA1, ABCB6, ABHD14B, ACACA, ACAP2, ACD, ACHE, ACVRL1, ADK, AFMID, AGO2, AIFM2, AIMP1, AK1, AK9, ANKRD1, AP5S1, APOBEC3C, ARAP1, ARHGEF19, ARHGEF3, ARL2, ARNTL, ARRB1, ASXL2, ATL3, ATP5A1, ATP6V0D1, ATP6V1F, ATP7A, ATR, ATXN1, ATXN7, BAD, BAX, BEX1, BLOC1S2, BMP5, BNC2, BRCA2, BRMS1L, BTG2, C1orf85, CAMK4, CAPN5, CBY1, CCDC106, CCRN4L, CDC14B, CDC42EP2, CECR1, CELF5, CENPI, CENPK, CENPP, …
GO:0034644	cellular response to UV	9	19.1489	0.00437601	[ATR, BAK1, BAX, HYAL2, MMAB, NFATC4, RHNO1, TMEM161A, YY1]
GO:0034645	cellular macromolecule biosynthetic process	353	7.74632	0.005026	[AATF, ABCA1, ABHD14B, ACD, ACHE, ACVRL1, AGO2, AIFM2, AIMP1, ALG10, ALG10B, ALG6, ALG9, ANKRD1, ARNTL, ARRB1, ASXL2, ATP7A, ATR, ATXN1, ATXN7, B3GNT1, B3GNT9, B4GALT6, B4GALT7, BEX1, BLOC1S2, BMP5, BNC2, BRCA2, BRMS1L, BTG2, C1orf85, CAMK4, CAPN5, CBY1, CCDC106, CCDC126, CCRN4L, CENPK, CEP290, CERCAM, CHD6, CHD8, CHEK2, CHRD, CIRBP, CPEB2, CRABP2, CREBRF, CRY2, CSDC2, CTC1, CTIF, CUX2, DARS2, DC…
GO:0034654	nucleobase-containing compound biosynthetic process	301	7.62411	0.0237291	[AATF, ABCA1, ABHD14B, ACACA, ACVRL1, ADK, AFMID, AGO2, AK1, AK9, ANKRD1, ARNTL, ARRB1, ASXL2, ATP5A1, ATXN1, ATXN7, BEX1, BLOC1S2, BMP5, BNC2, BRCA2, BRMS1L, C1orf85, CAMK4, CAPN5, CBY1, CCDC106, CCRN4L, CECR1, CENPK, CEP290, CHCHD10, CHD6, CHD8, CHEK2, CHRD, CRABP2, CREBRF, CRY2, CSDC2, CUX2, DDX58, DHFRL1, DHODH, DKK3, DPYD, DXO, DYRK1B, E2F8, EBF4, EDN1, EDNRB, EIF2AK2, ELK4, ELL2, ELOF1, EPA…
GO:0035306	positive regulation of dephosphorylation	4	20	0.0452765	[GBA, IGBP1, PRKCD, TGFB1]
GO:0035518	histone H2A monoubiquitination	3	37.5	0.0141904	[PCGF1, RING1, RYBP]
GO:0035773	insulin secretion involved in cellular response to glucose stimulus	6	17.1429	0.0311553	[ARRB1, BAD, EPHA5, LRP5, PHPT1, PLA2G6]
GO:0035774	positive regulation of insulin secretion involved in cellular response to glucose stimulus	4	30.7692	0.00981404	[ARRB1, BAD, PHPT1, PLA2G6]
GO:0035883	enteroendocrine cell differentiation	5	20	0.0260903	[ARNTL, BAD, BMP5, RFX3, SMOX]
GO:0035914	skeletal muscle cell differentiation	8	13.7931	0.0451103	[ANKRD1, ANKRD52, ARNTL, BTG2, EPAS1, MYOCD, NR1D2, UQCC2]
GO:0036211	protein modification process	219	7.74125	0.0317081	[ABCA1, ACD, ACSL1, ACVRL1, AGBL5, AGTPBP1, AKT1S1, ALG10, ALG10B, ALG6, ALG9, ANAPC13, ANXA2, ARRB1, ARRDC4, ARSE, ARSK, ATP6V0D1, ATP7A, ATR, ATXN7, B3GNT1, B3GNT9, B4GALT6, B4GALT7, BAK1, BAX, BMP5, BRCA2, BRMS1L, BTG2, C5, CAMK2G, CAMK4, CCDC126, CCDC88C, CD74, CDC14B, CDC25B, CDC37, CENPE, CHEK2, CHML, COPS7A, COQ7, CRY2, DCAF17, DCN, DDB2, DEPDC1B, DSCC1, DTX3, DUSP14, DUSP8, DYRK1B, DYRK3,…
GO:0036344	platelet morphogenesis	4	28.5714	0.0129992	[MFAP2, NBEAL2, VPS33A, ZFPM1]
GO:0042364	water-soluble vitamin biosynthetic process	4	44.4444	0.00216172	[MMAA, MMAB, PNPO, RFK]
GO:0042384	cilium assembly	13	11.5044	0.0481813	[ATP6V0D1, B9D2, C2CD3, CBY1, CEP164, CEP290, DZIP1, DZIP1L, IFT172, IFT20, PCNT, RAB8A, RFX3]
GO:0042402	cellular biogenic amine catabolic process	4	21.0526	0.0382476	[AFMID, SAT1, SLC38A1, SMOX]
GO:0042451	purine nucleoside biosynthetic process	12	12	0.0429009	[ACACA, ADK, AK9, ATP5A1, CECR1, CHCHD10, HPRT1, NME1, PRTFDC1, SLC35B2, SLC35B3, TGFB1]
GO:0042455	ribonucleoside biosynthetic process	15	12.8205	0.0148668	[ACACA, ADK, AK9, ATP5A1, CECR1, CHCHD10, DHODH, DPYD, HPRT1, NME1, PRTFDC1, QTRT1, SLC35B2, SLC35B3, TGFB1]
GO:0042554	superoxide anion generation	6	24	0.00611134	[AATF, AIFM2, CYBA, EDN1, PRKCD, TGFB1]
GO:0042559	pteridine-containing compound biosynthetic process	4	21.0526	0.0382476	[DHFRL1, NIF3L1, PCBD1, PCBD2]
GO:0042770	signal transduction in response to DNA damage	17	12.8788	0.00951557	[ANKRD1, ATR, BID, BRCA2, CD74, CHEK2, CRADD, GADD45A, ING4, KAT5, MMAB, MYO6, NDRG1, PGAP2, PSMB10, SMC1A, SP100]
GO:0042772	DNA damage response, signal transduction resulting in transcription	4	25	0.0211662	[BRCA2, ING4, KAT5, SP100]
GO:0043065	positive regulation of apoptotic process	41	10.3535	0.00623991	[AATF, AIFM2, ANKRD1, APPL1, ARHGEF3, ARRB1, BAD, BAK1, BAX, BBC3, BID, BRMS1L, C12orf5, CASP7, CD248, DHODH, FOSL1, FRZB, GADD45A, ING4, INPP5D, ITGB3BP, LPAR1, MAP2K6, MAP3K10, MAP3K9, NFATC4, OBSCN, PAWR, PDCD7, PHLDA3, PIAS4, PNMA1, PRMT2, SIAH1, TFPT, TGFB1, TNFRSF12A, TSPO, TXNIP, UNC5B]
GO:0043068	positive regulation of programmed cell death	41	10.1485	0.00868531	[AATF, AIFM2, ANKRD1, APPL1, ARHGEF3, ARRB1, BAD, BAK1, BAX, BBC3, BID, BRMS1L, C12orf5, CASP7, CD248, DHODH, FOSL1, FRZB, GADD45A, ING4, INPP5D, ITGB3BP, LPAR1, MAP2K6, MAP3K10, MAP3K9, NFATC4, OBSCN, PAWR, PDCD7, PHLDA3, PIAS4, PNMA1, PRMT2, SIAH1, TFPT, TGFB1, TNFRSF12A, TSPO, TXNIP, UNC5B]
GO:0043096	purine nucleobase salvage	3	50	0.00562817	[CECR1, HPRT1, PRTFDC1]
GO:0043101	purine-containing compound salvage	4	23.5294	0.0261996	[ADK, CECR1, HPRT1, PRTFDC1]
GO:0043162	ubiquitin-dependent protein catabolic process via the multivesicular body sorting pathway	3	25	0.045315	[PTPN23, TOM1L1, VPS28]
GO:0043170	macromolecule metabolic process	591	7.35441	0.0137615	[AATF, ABCA1, ABCC5, ABHD14B, ACACA, ACD, ACHE, ACSL1, ACVRL1, ADAMTS3, ADK, AGBL5, AGO2, AGTPBP1, AIFM2, AIMP1, AKT1S1, ALG10, ALG10B, ALG6, ALG9, ANAPC13, ANKRD1, ANXA2, AP5S1, APOBEC3C, ARAP1, ARNTL, ARRB1, ARRDC4, ARSE, ARSK, ASXL2, ATP6V0D1, ATP7A, ATR, ATXN1, ATXN7, B3GNT1, B3GNT9, B4GALT6, B4GALT7, BAD, BAK1, BAX, BBC3, BEX1, BID, BLOC1S2, BMP5, BNC2, BRCA2, BRMS1L, BTG2, C1RL, C1orf85, C2…
GO:0043171	peptide catabolic process	3	27.2727	0.0357819	[ACD, LTA4H, TPP1]
GO:0043217	myelin maintenance	4	36.3636	0.00506255	[MPP5, MYRF, NDRG1, SH3TC2]
GO:0043412	macromolecule modification	230	7.83646	0.0170161	[ABCA1, ACD, ACSL1, ACVRL1, AGBL5, AGTPBP1, AKT1S1, ALG10, ALG10B, ALG6, ALG9, ANAPC13, ANXA2, APOBEC3C, ARRB1, ARRDC4, ARSE, ARSK, ATP6V0D1, ATP7A, ATR, ATXN7, B3GNT1, B3GNT9, B4GALT6, B4GALT7, BAK1, BAX, BMP5, BRCA2, BRMS1L, BTG2, C5, CAMK2G, CAMK4, CCDC126, CCDC88C, CD74, CDC14B, CDC25B, CDC37, CENPE, CHEK2, CHML, COPS7A, COQ7, CRY2, DCAF17, DCN, DDB2, DEPDC1B, DSCC1, DTX3, DUSP14, DUSP8, DYRK…
GO:0043545	molybdopterin cofactor metabolic process	3	42.8571	0.00934536	[FLAD1, MOCS1, NFS1]
GO:0043569	negative regulation of insulin-like growth factor receptor signaling pathway	3	42.8571	0.00934536	[ATXN1, ATXN7, BMP5]
GO:0043653	mitochondrial fragmentation involved in apoptotic process	3	33.3333	0.0202047	[BAX, ERBB4, FIS1]
GO:0043933	macromolecular complex subunit organization	135	8.23171	0.0165499	[ABCA1, ACACA, ACHE, ACVRL1, ANGPTL4, ANXA2, ARAP1, ARL2, ARRB1, ASIC1, ATL3, ATPAF1, BAD, BAX, BBC3, BID, BORA, CADPS2, CCDC88C, CCRN4L, CD74, CDC42EP2, CDC42EP5, CENPC, CENPE, CENPI, CENPK, CENPP, CHEK2, CIRBP, CORO1A, COX14, CPT1A, CUTC, CYBA, DCXR, DGKH, EFTUD1, EIF2AK2, EIF3D, EIF3F, EIF3K, FIS1, FZR1, GEMIN8, GFPT1, H1F0, HAUS1, HAUS4, HAUS7, HELLS, HEXIM1, HIST1H2BH, HIST1H2BK, HIST2H2BE, …
GO:0044003	modification by symbiont of host morphology or physiology	6	15.3846	0.0496745	[BAD, CPSF4, EIF2AK2, HYAL2, SLC25A6, TGFB1]
GO:0044068	modulation by symbiont of host cellular process	5	41.6667	8.228132826010165E-4	[BAD, CPSF4, EIF2AK2, SLC25A6, TGFB1]
GO:0044249	cellular biosynthetic process	424	7.63551	0.00476902	[AATF, ABCA1, ABCB6, ABHD14B, ACACA, ACD, ACHE, ACOX2, ACSL1, ACSL4, ACVRL1, ADCK3, ADK, AFMID, AGO2, AIFM2, AIMP1, AK1, AK9, ALG10, ALG10B, ALG6, ALG9, ANKRD1, ARNTL, ARRB1, ASXL2, ATP5A1, ATP7A, ATR, ATXN1, ATXN7, B3GNT1, B3GNT9, B4GALT6, B4GALT7, BEX1, BLOC1S2, BMP5, BNC2, BRCA2, BRMS1L, BTG2, C1orf85, CAMK4, CAPN5, CBY1, CCDC106, CCDC126, CCRN4L, CD74, CECR1, CENPK, CEP290, CERCAM, CERS4, CER…
GO:0044260	cellular macromolecule metabolic process	548	7.48021	0.00481533	[AATF, ABCA1, ABHD14B, ACD, ACHE, ACSL1, ACVRL1, AGBL5, AGO2, AGTPBP1, AIFM2, AIMP1, AKT1S1, ALG10, ALG10B, ALG6, ALG9, ANAPC13, ANKRD1, ANXA2, AP5S1, APOBEC3C, ARAP1, ARNTL, ARRB1, ARRDC4, ARSE, ARSK, ASXL2, ATP6V0D1, ATP7A, ATR, ATXN1, ATXN7, B3GNT1, B3GNT9, B4GALT6, B4GALT7, BAD, BAK1, BAX, BEX1, BLOC1S2, BMP5, BNC2, BRCA2, BRMS1L, BTG2, C1orf85, C5, CAMK2G, CAMK4, CAPN5, CBY1, CCDC106, CCDC12…
GO:0044267	cellular protein metabolic process	281	7.62758	0.0287164	[ABCA1, ACD, ACSL1, ACVRL1, AGBL5, AGO2, AGTPBP1, AIFM2, AIMP1, AKT1S1, ALG10, ALG10B, ALG6, ALG9, ANAPC13, ANXA2, ARNTL, ARRB1, ARRDC4, ARSE, ARSK, ATP6V0D1, ATP7A, ATR, ATXN7, B3GNT1, B3GNT9, B4GALT6, B4GALT7, BAD, BAK1, BAX, BMP5, BRCA2, BRMS1L, BTG2, C5, CAMK2G, CAMK4, CCDC126, CCDC88C, CD74, CDC14B, CDC25B, CDC37, CENPE, CHEK2, CHML, CIRBP, CLN5, COPS7A, COQ7, CPEB2, CRY2, CTIF, CTSK, CTSL, …
GO:0044271	cellular nitrogen compound biosynthetic process	316	7.72239	0.0103023	[AATF, ABCA1, ABCB6, ABHD14B, ACACA, ACVRL1, ADK, AFMID, AGO2, AIFM2, AK1, AK9, ANKRD1, ARNTL, ARRB1, ASXL2, ATP5A1, ATXN1, ATXN7, BEX1, BLOC1S2, BMP5, BNC2, BRCA2, BRMS1L, C1orf85, CAMK4, CAPN5, CBY1, CCDC106, CCRN4L, CECR1, CENPK, CEP290, CHCHD10, CHD6, CHD8, CHEK2, CHRD, CRABP2, CREBRF, CRY2, CSDC2, CUX2, DDX58, DHFRL1, DHODH, DKK3, DPYD, DXO, DYRK1B, E2F8, EBF4, EDN1, EDNRB, EIF2AK2, ELK4, EL…
GO:0045184	establishment of protein localization	127	8.39392	0.0112106	[AAGAB, ABCA1, ACD, ACHE, ANKRD1, ANXA2, AP1S1, AP3B2, AP4B1, AP4E1, AP4M1, AP5S1, APPBP2, APPL1, ARHGAP33, ARNTL, ARRB1, ATP6V0A1, ATP6V0D1, ATP6V1F, BAD, BAX, BBC3, BID, BLOC1S3, BLOC1S6, BTN3A1, C5, CADPS2, CAMK4, CARD8, CCDC91, CD74, CDC37, CEP290, CEP55, CHML, COPZ1, CREBRF, CRY2, CTSA, CUBN, DACT3, DDX58, ERBB4, FIS1, FZR1, GDAP1, GLE1, GNPTAB, GOLGA1, HYAL2, IL1A, KANK1, KIF13B, KIF14, KIF…
GO:0045838	positive regulation of membrane potential	5	22.7273	0.015345	[BAD, CUX2, NLGN1, PIAS3, SHANK1]
GO:0045843	negative regulation of striated muscle tissue development	4	21.0526	0.0382476	[TGFB1, TSC22D3, USP19, YBX3]
GO:0046031	ADP metabolic process	3	60	0.00296643	[AK9, BAD, NUDT9]
GO:0046085	adenosine metabolic process	3	27.2727	0.0357819	[ADK, CECR1, MTO1]
GO:0046100	hypoxanthine metabolic process	3	42.8571	0.00934536	[CECR1, HPRT1, PRTFDC1]
GO:0046112	nucleobase biosynthetic process	4	21.0526	0.0382476	[CECR1, DHODH, HPRT1, PRTFDC1]
GO:0046129	purine ribonucleoside biosynthetic process	12	12	0.0429009	[ACACA, ADK, AK9, ATP5A1, CECR1, CHCHD10, HPRT1, NME1, PRTFDC1, SLC35B2, SLC35B3, TGFB1]
GO:0046467	membrane lipid biosynthetic process	13	13.1313	0.0186673	[CERS4, CERS5, GBA, LARGE, PGAP2, PIGM, PIGN, PIGT, PLA2G6, PPAP2A, PRKCD, SGMS1, SGPP1]
GO:0046483	heterocycle metabolic process	458	7.559	0.00643912	[AATF, ABCA1, ABCB6, ABHD14B, ACACA, ACAP2, ACD, ACHE, ACVRL1, ADK, AFMID, AGO2, AIFM2, AIMP1, AK1, AK9, ANKRD1, AP5S1, APOBEC3C, ARAP1, ARHGEF19, ARHGEF3, ARL2, ARNTL, ARRB1, ASXL2, ATL3, ATP5A1, ATP6V0D1, ATP6V1F, ATP7A, ATR, ATXN1, ATXN7, BAD, BAX, BEX1, BLOC1S2, BMP5, BNC2, BRCA2, BRMS1L, BTG2, C1orf85, CAMK4, CAPN5, CBY1, CCDC106, CCRN4L, CDC14B, CDC42EP2, CECR1, CELF5, CENPI, CENPK, CENPP, …
GO:0046697	decidualization	4	21.0526	0.0382476	[EPOR, JUNB, LIF, STC1]
GO:0046835	carbohydrate phosphorylation	5	22.7273	0.015345	[DAK, GNPTAB, NAGK, PFKFB2, PFKP]
GO:0048066	developmental pigmentation	8	15.0943	0.0281517	[BAX, BLOC1S3, BLOC1S6, EDNRB, HPS6, MREG, RAB27A, VPS33A]
GO:0048285	organelle fission	56	9.96441	0.00361542	[ANAPC13, ANAPC15, BAX, BORA, BRCA2, CDC25B, CDCA2, CENPC, CENPE, CEP164, CEP55, CETN3, CHEK2, DHODH, DSCC1, EDN1, ERBB4, FIS1, FSD1, FZR1, GDAP1, HAUS1, HAUS4, HAUS7, HELLS, IL1A, ITGB3BP, KIAA0430, KIF18A, KIF23, LATS2, LIF, LIG3, LRP5, LRRCC1, MAPRE3, MTFR2, NCAPG, NUP37, OIP5, PAPD7, PRMT5, RBBP8, SIRT7, SMC1A, SMC5, SNX18, SPIRE2, STAG1, TADA3, TDRKH, TGFB1, TOM1L1, TTK, USP37, ZC3HC1]
GO:0048490	anterograde synaptic vesicle transport	4	25	0.0211662	[AP3B2, BLOC1S2, BLOC1S3, BLOC1S6]
GO:0048641	regulation of skeletal muscle tissue development	12	20.339	6.06008160613408E-4	[ARNTL, FBXO22, HDAC5, MBNL3, MEGF10, MYOCD, NR1D2, TGFB1, TSC22D3, UQCC2, USP19, YBX3]
GO:0048642	negative regulation of skeletal muscle tissue development	4	50	0.00127031	[TGFB1, TSC22D3, USP19, YBX3]
GO:0048753	pigment granule organization	4	20	0.0452765	[BLOC1S2, BLOC1S3, BLOC1S6, LYST]
GO:0050684	regulation of mRNA processing	11	15.942	0.00739284	[AGO2, BTG2, CPSF4, CWC22, NCBP1, NSRP1, PEX2, SRSF12, SRSF6, TOB1, ZFP36]
GO:0050685	positive regulation of mRNA processing	6	25	0.00492794	[AGO2, BTG2, NCBP1, PEX2, TOB1, ZFP36]
GO:0050701	interleukin-1 secretion	5	20	0.0260903	[ABCA1, CARD8, NLRP2, S100A13, TRIM16]
GO:0050931	pigment cell differentiation	6	15.3846	0.0496745	[BLOC1S3, BLOC1S6, EDNRB, HPS6, MREG, RAB27A]
GO:0051052	regulation of DNA metabolic process	26	9.88593	0.0417653	[ACD, ACVRL1, ANKRD1, ATR, BAX, BMP5, BRCA2, CHEK2, CTC1, DEPDC1B, DSCC1, E2F8, ESCO2, HUS1, LIG3, MMAB, MPHOSPH8, PARPBP, S100A11, SMC1A, TGFB1, TICRR, TINF2, TMEM161A, TOM1L1, TSPYL2]
GO:0051053	negative regulation of DNA metabolic process	15	19.4805	2.1807184597488584E-4	[ACD, ACVRL1, ANKRD1, ATR, BRCA2, CHEK2, HUS1, LIG3, MMAB, PARPBP, S100A11, SMC1A, TGFB1, TINF2, TSPYL2]
GO:0051085	chaperone mediated protein folding requiring cofactor	4	36.3636	0.00506255	[CD74, ERO1L, TOR2A, TOR4A]
GO:0051171	regulation of nitrogen compound metabolic process	307	7.65014	0.0188209	[AATF, ABCA1, ABHD14B, ACAP2, ACD, ACVRL1, AGO2, ANKRD1, ARAP1, ARHGEF19, ARHGEF3, ARL2, ARNTL, ARRB1, ASXL2, ATP6V0D1, ATR, ATXN1, ATXN7, BAX, BEX1, BLOC1S2, BMP5, BNC2, BRCA2, BRMS1L, BTG2, C1orf85, CAMK4, CAPN5, CBY1, CCDC106, CCRN4L, CDC42EP2, CENPK, CEP290, CHD6, CHD8, CHEK2, CHRD, COQ7, CPEB2, CPSF4, CRABP2, CREBRF, CRY2, CSDC2, CTC1, CUX2, CWC22, DDX58, DENND3, DENND5B, DEPDC1B, DKK3, DSCC…
GO:0051188	cofactor biosynthetic process	21	14.3836	0.00108494	[ABCB6, ACACA, ACSL1, ACSL4, ADCK3, AFMID, COQ2, COQ7, DHFRL1, FLAD1, MOCS1, NFS1, NIF3L1, NMNAT2, PCBD1, PCBD2, PDK2, PDK3, RFK, TSPO, UROD]
GO:0051189	prosthetic group metabolic process	3	42.8571	0.00934536	[FLAD1, MOCS1, NFS1]
GO:0051252	regulation of RNA metabolic process	259	7.88913	0.00800995	[AATF, ABHD14B, ACVRL1, AGO2, ANKRD1, ARNTL, ARRB1, ASXL2, ATXN1, ATXN7, BEX1, BLOC1S2, BMP5, BNC2, BRCA2, BRMS1L, BTG2, C1orf85, CAMK4, CAPN5, CBY1, CCDC106, CCRN4L, CENPK, CEP290, CHD6, CHD8, CHEK2, CHRD, COQ7, CPSF4, CRABP2, CREBRF, CRY2, CSDC2, CUX2, CWC22, DDX58, DKK3, DXO, DYRK1B, E2F8, EBF4, EDN1, EDNRB, EIF2AK2, ELK4, ELL2, ELOF1, EPAS1, EPHA5, ERBB4, ESF1, FHL2, FOSL1, FOXB1, FZR1, GABPA…
GO:0051259	protein oligomerization	38	9.42928	0.0318297	[ACACA, ACHE, ACVRL1, ANGPTL4, ANXA2, ASIC1, ATL3, BAX, BBC3, BID, CCDC88C, CPT1A, CUTC, DCXR, DGKH, FIS1, FZR1, GFPT1, HPRT1, KCND1, KCNJ2, KCTD1, KCTD17, KCTD18, KCTD2, KCTD21, KCTD7, LNX2, NLGN1, OXA1L, PCBD1, PCBD2, S100A10, STOM, TOR2A, TRIM27, TRIM6, TYSND1]
GO:0051260	protein homooligomerization	29	11.4625	0.0050677	[ACACA, ANGPTL4, ASIC1, ATL3, BAX, BBC3, BID, CCDC88C, CPT1A, DCXR, FIS1, FZR1, GFPT1, HPRT1, KCND1, KCNJ2, KCTD1, KCTD17, KCTD18, KCTD2, KCTD21, KCTD7, LNX2, NLGN1, PCBD1, PCBD2, STOM, TOR2A, TYSND1]
GO:0051262	protein tetramerization	13	13.6842	0.0135532	[ACACA, ACHE, ANXA2, CUTC, DCXR, GFPT1, HPRT1, KCNJ2, NLGN1, OXA1L, PCBD1, PCBD2, S100A10]
GO:0051290	protein heterotetramerization	3	27.2727	0.0357819	[ANXA2, NLGN1, S100A10]
GO:0051297	centrosome organization	12	15	0.00859842	[ARL2, BRCA2, CEP68, CETN3, CROCC, GADD45A, HAUS1, HAUS4, HAUS7, SASS6, SSX2IP, TUBB4A]
GO:0051503	adenine nucleotide transport	3	42.8571	0.00934536	[SLC25A42, SLC25A6, SLC35B2]
GO:0051726	regulation of cell cycle	68	8.45771	0.0476632	[AATF, AK1, ANAPC15, ARNTL, BAD, BAK1, BAX, BEX1, BID, BORA, BRCA2, CAB39L, CDC25B, CDC37, CGRRF1, CHEK2, CRADD, CSPP1, CTC1, E2F8, EDN1, FOSL1, FZR1, GADD45A, GAS2L3, HEXIM1, HUS1, IL1A, ING4, JUNB, KIF23, KMT2E, LATS2, LIF, LRP5, MAP2K6, MAPRE3, MDC1, MTBP, MYOCD, NABP1, NDRG1, PIM1, PRDM4, PRMT2, PRMT5, PSMB10, RBL1, REXO2, RHNO1, RNF167, RPS27L, SART1, SERTAD1, SESN1, SESN2, SMC1A, SMC5, TGFB…
GO:0052173	response to defenses of other organism involved in symbiotic interaction	3	25	0.045315	[EIF2AK2, SLC25A6, TGFB1]
GO:0052200	response to host defenses	3	25	0.045315	[EIF2AK2, SLC25A6, TGFB1]
GO:0052564	response to immune response of other organism involved in symbiotic interaction	3	27.2727	0.0357819	[EIF2AK2, SLC25A6, TGFB1]
GO:0052572	response to host immune response	3	27.2727	0.0357819	[EIF2AK2, SLC25A6, TGFB1]
GO:0055119	relaxation of cardiac muscle	3	25	0.045315	[CAMK2G, KCNJ2, PDE5A]
GO:0060155	platelet dense granule organization	3	33.3333	0.0202047	[ABCA1, BLOC1S2, BLOC1S3]
GO:0060211	regulation of nuclear-transcribed mRNA poly(A) tail shortening	4	36.3636	0.00506255	[AGO2, BTG2, TOB1, ZFP36]
GO:0060213	positive regulation of nuclear-transcribed mRNA poly(A) tail shortening	4	36.3636	0.00506255	[AGO2, BTG2, TOB1, ZFP36]
GO:0060242	contact inhibition	3	33.3333	0.0202047	[PAK1, SMOX, TSPO]
GO:0060255	regulation of macromolecule metabolic process	371	7.83527	0.00168836	[AATF, ABHD14B, ACD, ACHE, ACSL1, ACVRL1, ADK, AGO2, AIFM2, AKT1S1, ANKRD1, ANXA2, APOBEC3C, ARAP1, ARNTL, ARRB1, ARRDC4, ASXL2, ATP6V0D1, ATP7A, ATR, ATXN1, ATXN7, BAD, BAK1, BAX, BEX1, BLOC1S2, BMP5, BNC2, BRCA2, BRMS1L, BTG2, C1orf85, C2CD3, C5, CAMK4, CAPN5, CBY1, CCDC106, CCDC88C, CCRN4L, CD74, CDC14B, CDC25B, CDC37, CENPE, CENPK, CEP290, CHD6, CHD8, CHEK2, CHRD, CIRBP, COQ7, CPEB2, CPSF4, C…
GO:0060393	regulation of pathway-restricted SMAD protein phosphorylation	6	15.7895	0.0445308	[ACVRL1, BMP5, SMAD6, SRFBP1, TGFB1, TTK]
GO:0060538	skeletal muscle organ development	19	10.6145	0.0410699	[ANKRD1, ANKRD52, ARNTL, BTG2, DCN, EPAS1, FBXO22, GPX1, HDAC5, MBNL3, MEGF10, MYOCD, NR1D2, SLC25A37, TGFB1, TSC22D3, UQCC2, USP19, YBX3]
GO:0060999	positive regulation of dendritic spine development	4	23.5294	0.0261996	[CUX2, LPAR1, NLGN1, SHANK1]
GO:0061013	regulation of mRNA catabolic process	4	23.5294	0.0261996	[AGO2, BTG2, TOB1, ZFP36]
GO:0061014	positive regulation of mRNA catabolic process	4	26.6667	0.0167736	[AGO2, BTG2, TOB1, ZFP36]
GO:0061178	regulation of insulin secretion involved in cellular response to glucose stimulus	6	19.3548	0.0178474	[ARRB1, BAD, EPHA5, LRP5, PHPT1, PLA2G6]
GO:0065003	macromolecular complex assembly	114	8.80309	0.00390264	[ABCA1, ACACA, ACHE, ACVRL1, ANGPTL4, ANXA2, ARL2, ASIC1, ATL3, ATPAF1, BAD, BAX, BBC3, BID, CADPS2, CCDC88C, CCRN4L, CD74, CDC42EP2, CDC42EP5, CENPC, CENPE, CENPI, CENPK, CENPP, CHEK2, CIRBP, CORO1A, COX14, CPT1A, CUTC, CYBA, DCXR, DGKH, EFTUD1, EIF2AK2, EIF3D, EIF3F, EIF3K, FIS1, FZR1, GEMIN8, GFPT1, H1F0, HAUS1, HAUS4, HAUS7, HELLS, HEXIM1, HIST1H2BH, HIST1H2BK, HIST2H2BE, HPRT1, ITGB3BP, KANK…
GO:0070271	protein complex biogenesis	94	8.31123	0.0338104	[ACACA, ACHE, ACVRL1, ANGPTL4, ANXA2, ARL2, ASIC1, ATL3, ATPAF1, BAD, BAX, BBC3, BID, CADPS2, CCDC88C, CD74, CDC42EP2, CDC42EP5, CENPC, CENPE, CENPI, CENPK, CENPP, CHEK2, CORO1A, COX14, CPT1A, CUTC, CYBA, DCXR, DGKH, EIF2AK2, FIS1, FZR1, GFPT1, H1F0, HAUS1, HAUS4, HAUS7, HIST1H2BH, HIST1H2BK, HIST2H2BE, HPRT1, ITGB3BP, KANK1, KAT6B, KCND1, KCNJ2, KCTD1, KCTD17, KCTD18, KCTD2, KCTD21, KCTD7, KIF14…
GO:0070585	protein localization to mitochondrion	12	13.3333	0.0208594	[BAD, BAX, BBC3, BID, FIS1, GDAP1, MTX1, REXO2, SLC25A6, TIMM13, TOMM6, TSPO]
GO:0070646	protein modification by small protein removal	14	13.7255	0.0103832	[ATXN7, COPS7A, DEPDC1B, EIF3F, OTUB2, OTUD4, OTUD5, OTULIN, SUPT3H, USP11, USP19, USP25, USP34, USP37]
GO:0070925	organelle assembly	31	9.71787	0.0346214	[ANKRD1, ATP6V0D1, B9D2, C2CD3, CBY1, CCRN4L, CENPC, CENPE, CEP164, CEP290, CHEK2, CIRBP, CORO1A, CTSD, DZIP1, DZIP1L, EDN1, EFTUD1, HAUS1, HAUS4, HAUS7, IFT172, IFT20, KIF23, NEURL2, OBSCN, PCNT, PIK3C3, RAB8A, RFX3, TBPL1]
GO:0071229	cellular response to acid	17	11.8881	0.019956	[ABCA1, ANXA2, CPT1A, CYBA, FZR1, KMT2E, LAMTOR2, LAMTOR4, LANCL2, NME1, PDGFD, PDK3, PTK2B, S100A10, SOCS1, TNNC1, ZNF35]
GO:0071322	cellular response to carbohydrate stimulus	11	12.6437	0.0370308	[ARRB1, BAD, CYBA, EPHA5, LRP5, MAP2K6, NME1, PDK3, PHPT1, PLA2G6, SLC29A1]
GO:0071326	cellular response to monosaccharide stimulus	10	12.6582	0.0451272	[ARRB1, BAD, CYBA, EPHA5, LRP5, NME1, PDK3, PHPT1, PLA2G6, SLC29A1]
GO:0071331	cellular response to hexose stimulus	10	12.8205	0.0418981	[ARRB1, BAD, CYBA, EPHA5, LRP5, NME1, PDK3, PHPT1, PLA2G6, SLC29A1]
GO:0071333	cellular response to glucose stimulus	10	13.1579	0.0359208	[ARRB1, BAD, CYBA, EPHA5, LRP5, NME1, PDK3, PHPT1, PLA2G6, SLC29A1]
GO:0071478	cellular response to radiation	16	11.1888	0.0383989	[ATR, BAK1, BAX, CRY2, CYBA, GADD45A, HUS1, HYAL2, MMAB, NFATC4, RHNO1, RSC1A1, SLC24A1, TMEM161A, WRN, YY1]
GO:0071480	cellular response to gamma radiation	4	25	0.0211662	[ATR, CYBA, MMAB, WRN]
GO:0071482	cellular response to light stimulus	12	12.9032	0.0263022	[ATR, BAK1, BAX, CRY2, HYAL2, MMAB, NFATC4, RHNO1, RSC1A1, SLC24A1, TMEM161A, YY1]
GO:0071826	ribonucleoprotein complex subunit organization	18	12.0805	0.0145935	[CCRN4L, CIRBP, EFTUD1, EIF3D, EIF3F, EIF3K, GEMIN8, HEXIM1, NCBP1, NCBP2, NUFIP1, PRMT5, RPL13A, SART1, SRFBP1, SRSF12, SRSF6, TICRR]
GO:0072331	signal transduction by p53 class mediator	18	10.6509	0.044583	[ANKRD1, ATR, BAX, BRCA2, CD74, CDIP1, CRADD, ING4, KAT5, MMAB, MYO6, NDRG1, PDK2, PGAP2, PHLDA3, PSMB10, RPS27L, SP100]
GO:0072655	establishment of protein localization to mitochondrion	12	13.4831	0.0192459	[BAD, BAX, BBC3, BID, FIS1, GDAP1, MTX1, REXO2, SLC25A6, TIMM13, TOMM6, TSPO]
GO:0075136	response to host	3	25	0.045315	[EIF2AK2, SLC25A6, TGFB1]
GO:0080090	regulation of primary metabolic process	382	7.66606	0.00649379	[AATF, ABCA1, ABHD14B, ACAP2, ACD, ACSL1, ACVRL1, AGO2, AIFM2, AKT1S1, ANKRD1, ANKRD26, ANXA2, ARAP1, ARHGEF19, ARHGEF3, ARL2, ARNTL, ARRB1, ARRDC4, ASXL2, ATP6V0D1, ATR, ATXN1, ATXN7, BAD, BAK1, BAX, BEX1, BLOC1S2, BMP5, BNC2, BRCA2, BRMS1L, BTG2, C1orf85, C2CD3, C5, CAMK4, CAPN5, CBY1, CCDC106, CCDC88C, CCRN4L, CD74, CDC14B, CDC25B, CDC37, CDC42EP2, CENPE, CENPK, CEP290, CHD6, CHD8, CHEK2, CHRD…
GO:0090199	regulation of release of cytochrome c from mitochondria	8	18.1818	0.00970513	[BAD, BAK1, BAX, BBC3, BID, GPX1, PINK1, PLA2G6]
GO:0090200	positive regulation of release of cytochrome c from mitochondria	7	28	0.00118049	[BAD, BAK1, BAX, BBC3, BID, PINK1, PLA2G6]
GO:0090304	nucleic acid metabolic process	373	7.65599	0.00798942	[AATF, ABHD14B, ACD, ACHE, ACVRL1, AGO2, AIMP1, ANKRD1, AP5S1, APOBEC3C, ARNTL, ARRB1, ASXL2, ATR, ATXN1, ATXN7, BAX, BEX1, BLOC1S2, BMP5, BNC2, BRCA2, BRMS1L, BTG2, C1orf85, CAMK4, CAPN5, CBY1, CCDC106, CCRN4L, CDC14B, CELF5, CENPI, CENPK, CENPP, CEP164, CEP290, CHD6, CHD8, CHEK2, CHRD, COQ7, CPSF4, CRABP2, CREBRF, CRY2, CSDC2, CTC1, CTIF, CUX2, CWC22, DARS2, DDB2, DDX58, DEPDC1B, DKK3, DSCC1, D…
GO:0090399	replicative senescence	4	26.6667	0.0167736	[ATR, CHEK2, CTC1, MMAB]
GO:0097031	mitochondrial respiratory chain complex I biogenesis	4	23.5294	0.0261996	[NDUFAF7, NDUFS7, NDUFS8, OXA1L]
GO:0097190	apoptotic signaling pathway	55	8.92857	0.030207	[AATF, ARHGEF3, ATP7A, BAD, BAK1, BAX, BBC3, BID, BLOC1S2, BMP5, BRCA2, CASP7, CD74, CDIP1, CHEK2, CRADD, CTSC, CX3CL1, ERO1L, FIS1, GPX1, HELLS, HSPA1A, HSPA1B, HYAL2, IGBP1, IL1A, ITGB3BP, KIAA0141, NFATC4, NGFRAP1, OBSCN, PAWR, PDCD7, PDK2, PGAP2, PHLDA3, PIAS4, PINK1, PLA2G6, PRKCD, REXO2, RPS27L, SART1, SGMS1, SGPP1, SIAH1, SP100, TFPT, TGFB1, TMEM161A, TNFRSF12A, UNC5B, YBX3, ZC3HC1]
GO:0097193	intrinsic apoptotic signaling pathway	26	9.73783	0.0486406	[BAD, BAK1, BAX, BBC3, BID, BRCA2, CASP7, CD74, CDIP1, CHEK2, ERO1L, FIS1, GPX1, HELLS, NFATC4, PDK2, PGAP2, PHLDA3, PIAS4, REXO2, RPS27L, SART1, SGPP1, SIAH1, TMEM161A, YBX3]
GO:0097501	stress response to metal ion	3	100	3.2982564719649345E-4	[ABCB6, ATP7A, SLC30A1]
GO:1900101	regulation of endoplasmic reticulum unfolded protein response	3	50	0.00562817	[BAK1, BAX, CREBRF]
GO:1900151	regulation of nuclear-transcribed mRNA catabolic process, deadenylation-dependent decay	4	33.3333	0.00718243	[AGO2, BTG2, TOB1, ZFP36]
GO:1900153	positive regulation of nuclear-transcribed mRNA catabolic process, deadenylation-dependent decay	3	30	0.0274039	[AGO2, TOB1, ZFP36]
GO:1901030	positive regulation of mitochondrial outer membrane permeabilization involved in apoptotic signaling pathway	3	37.5	0.0141904	[BAK1, BAX, BID]
GO:1901099	negative regulation of signal transduction in absence of ligand	6	17.1429	0.0311553	[CX3CL1, HSPA1A, HSPA1B, IL1A, UNC5B, ZC3HC1]
GO:1901264	carbohydrate derivative transport	9	21.9512	0.00163285	[EHHADH, NPC2, SLC17A5, SLC25A42, SLC25A6, SLC29A1, SLC35A3, SLC35B2, SLC37A4]
GO:1901360	organic cyclic compound metabolic process	467	7.43039	0.0202306	[AATF, ABCA1, ABCB6, ABHD14B, ACACA, ACAP2, ACD, ACHE, ACOX2, ACVRL1, ADK, AFMID, AFP, AGO2, AIFM2, AIMP1, AK1, AK9, ANKRD1, AP5S1, APOBEC3C, ARAP1, ARHGEF19, ARHGEF3, ARL2, ARNTL, ARRB1, ASXL2, ATL3, ATP5A1, ATP6V0D1, ATP6V1F, ATP7A, ATR, ATXN1, ATXN7, BAD, BAX, BEX1, BLOC1S2, BMP5, BNC2, BRCA2, BRMS1L, BTG2, C1orf85, CAMK4, CAPN5, CBY1, CCDC106, CCRN4L, CDC14B, CDC42EP2, CECR1, CELF5, CENPI, CE…
GO:1901362	organic cyclic compound biosynthetic process	314	7.56444	0.0301431	[AATF, ABCA1, ABCB6, ABHD14B, ACACA, ACOX2, ACVRL1, ADK, AFMID, AGO2, AIFM2, AK1, AK9, ANKRD1, ARNTL, ARRB1, ASXL2, ATP5A1, ATP7A, ATXN1, ATXN7, BEX1, BLOC1S2, BMP5, BNC2, BRCA2, BRMS1L, C1orf85, CAMK4, CAPN5, CBY1, CCDC106, CCRN4L, CECR1, CENPK, CEP290, CHCHD10, CHD6, CHD8, CHEK2, CHRD, CRABP2, CREBRF, CRY2, CSDC2, CUX2, DDX58, DHFRL1, DHODH, DKK3, DPYD, DXO, DYRK1B, E2F8, EBF4, EDN1, EDNRB, EIF…
GO:1901566	organonitrogen compound biosynthetic process	70	9.51087	0.00392448	[ABCA1, ABCB6, ABCC5, ACACA, ACHE, ADK, AFMID, AIFM2, AK9, ATP5A1, ATP7A, B3GNT1, B4GALT6, B4GALT7, CECR1, CERS4, CERS5, CHCHD10, CHEK2, CSAD, DCN, DHFRL1, DHODH, DPYD, DSEL, EDN1, EDNRB, FLAD1, GBA, GSS, HAGH, HPRT1, HS3ST3A1, LARGE, LPIN3, MMAA, MMAB, MOCS1, MRPS26, MRPS28, NDST2, NFS1, NIF3L1, NME1, NMNAT2, PCBD1, PCBD2, PEMT, PLA2G6, PNPO, PPAP2A, PRKCD, PRTFDC1, PTK2B, QTRT1, RFK, SAT1, SDC4…
GO:1901576	organic substance biosynthetic process	432	7.63521	0.00426382	[AATF, ABCA1, ABCB6, ABCC5, ABHD14B, ACACA, ACD, ACHE, ACOX2, ACSL1, ACSL4, ACVRL1, ADCK3, ADK, AFMID, AGO2, AIFM2, AIMP1, AK1, AK9, ALG10, ALG10B, ALG6, ALG9, ANKRD1, ARNTL, ARRB1, ASXL2, ATP5A1, ATP7A, ATR, ATXN1, ATXN7, B3GNT1, B3GNT9, B4GALT6, B4GALT7, BEX1, BLOC1S2, BMP5, BNC2, BRCA2, BRMS1L, BTG2, C1orf85, CAMK4, CAPN5, CBY1, CCDC106, CCDC126, CCRN4L, CD74, CECR1, CENPK, CEP290, CERCAM, CER…
GO:1901642	nucleoside transmembrane transport	3	37.5	0.0141904	[SLC25A42, SLC29A1, SLC35B2]
GO:1901659	glycosyl compound biosynthetic process	16	12.5984	0.0142122	[ACACA, ADK, AK9, ATP5A1, CECR1, CHCHD10, DHFRL1, DHODH, DPYD, HPRT1, NME1, PRTFDC1, QTRT1, SLC35B2, SLC35B3, TGFB1]
GO:1901685	glutathione derivative metabolic process	5	17.2414	0.0465047	[GSS, GSTA4, GSTM3, GSTT1, MGST3]
GO:1901687	glutathione derivative biosynthetic process	5	17.2414	0.0465047	[GSS, GSTA4, GSTM3, GSTT1, MGST3]
GO:1901861	regulation of muscle tissue development	13	11.5044	0.0481813	[ARNTL, ERBB4, FBXO22, HDAC5, MBNL3, MEGF10, MYOCD, NR1D2, TGFB1, TSC22D3, UQCC2, USP19, YBX3]
GO:1901862	negative regulation of muscle tissue development	4	21.0526	0.0382476	[TGFB1, TSC22D3, USP19, YBX3]
GO:1902108	regulation of mitochondrial membrane permeability involved in apoptotic process	8	14.0351	0.0412847	[BAD, BAK1, BAX, BBC3, BID, BLOC1S2, REXO2, THEM4]
GO:1902262	apoptotic process involved in patterning of blood vessels	3	50	0.00562817	[BAK1, BAX, LRP5]
GO:1902589	single-organism organelle organization	144	8	0.0318487	[ACD, ANAPC13, ANAPC15, ANKRD1, ANXA2, ARAP1, ARHGEF19, ARL2, ARRB1, ATXN7, BAD, BAK1, BAX, BBC3, BID, BLOC1S2, BORA, BRCA2, CDC25B, CDC42EP2, CDC42EP5, CDCA2, CENPC, CENPE, CEP164, CEP55, CEP57L1, CEP68, CETN3, CHEK2, COPZ1, COQ7, CORO1A, CORO2A, CROCC, CTC1, DARS2, DEPDC1B, DSCC1, EDN1, EHD2, ELK4, EPHA5, FIS1, FSD1, FZR1, GADD45A, GAS2L3, GPSM2, HAUS1, HAUS4, HAUS7, HDAC5, HELLS, IL1A, INA, IN…
GO:2000074	regulation of type B pancreatic cell development	3	42.8571	0.00934536	[ARNTL, BAD, RFX3]
GO:2000112	regulation of cellular macromolecule biosynthetic process	280	8.12301	0.00102982	[AATF, ABHD14B, ACD, ACVRL1, AGO2, AIFM2, ANKRD1, ARNTL, ARRB1, ASXL2, ATR, ATXN1, ATXN7, BEX1, BLOC1S2, BMP5, BNC2, BRCA2, BRMS1L, BTG2, C1orf85, CAMK4, CAPN5, CBY1, CCDC106, CCRN4L, CENPK, CEP290, CHD6, CHD8, CHEK2, CHRD, CIRBP, CPEB2, CRABP2, CREBRF, CRY2, CSDC2, CTC1, CTIF, CUX2, DDX58, DKK3, DSCC1, DXO, DYRK1B, E2F8, EBF4, EDN1, EDNRB, EIF1B, EIF2AK2, EIF2B5, EIF3D, EIF3F, EIF3K, EIF4A2, ELK…
GO:2000113	negative regulation of cellular macromolecule biosynthetic process	89	8.50048	0.0234911	[AATF, ACD, ACVRL1, AGO2, AIFM2, ANKRD1, ATR, ATXN1, BRCA2, BRMS1L, BTG2, CBY1, CHD8, CHEK2, CPEB2, CREBRF, CRY2, CUX2, DKK3, E2F8, EDN1, EDNRB, EIF2AK2, EIF2B5, ELK4, FHL2, FOXB1, GABPA, GFPT1, HCFC2, HDAC5, HELLS, HEXIM1, HUS1, IGBP1, ING4, KAT5, KAT6B, KCTD1, KDM5B, KLF12, LANCL2, MAP3K10, MDFIC, MMAB, MPHOSPH8, MXD4, NKRF, NR1D2, PAWR, PER3, PEX2, PHF19, PIAS4, PRMT2, PRMT5, RBBP8, RBL1, RFX3…
GO:2000114	regulation of establishment of cell polarity	3	30	0.0274039	[KANK1, KRIT1, PTK2B]
GO:2000377	regulation of reactive oxygen species metabolic process	9	13.0435	0.0473603	[AATF, C12orf5, GADD45A, PDK3, PRKCD, PTK2B, SIRT5, TGFB1, TSPO]
GO:2001014	regulation of skeletal muscle cell differentiation	4	33.3333	0.00718243	[ARNTL, MYOCD, NR1D2, UQCC2]
GO:2001022	positive regulation of response to DNA damage stimulus	8	13.5593	0.0491613	[ANKRD1, ATR, DEPDC1B, MMAB, NSMCE1, PIAS4, PRKCD, TMEM161A]
GO:2001141	regulation of RNA biosynthetic process	249	7.79831	0.0159898	[AATF, ABHD14B, ACVRL1, AGO2, ANKRD1, ARNTL, ARRB1, ASXL2, ATXN1, ATXN7, BEX1, BLOC1S2, BMP5, BNC2, BRCA2, BRMS1L, C1orf85, CAMK4, CAPN5, CBY1, CCDC106, CCRN4L, CENPK, CEP290, CHD6, CHD8, CHEK2, CHRD, CRABP2, CREBRF, CRY2, CSDC2, CUX2, DDX58, DKK3, DXO, DYRK1B, E2F8, EBF4, EDN1, EDNRB, EIF2AK2, ELK4, ELL2, ELOF1, EPAS1, EPHA5, ERBB4, ESF1, FHL2, FOSL1, FOXB1, FZR1, GABPA, GABPB1, GTF2H2, HCFC2, H…
GO:2001233	regulation of apoptotic signaling pathway	34	9.34066	0.0453391	[BAD, BAK1, BAX, BBC3, BID, BMP5, CD74, CRADD, CTSC, CX3CL1, FIS1, GPX1, HELLS, HSPA1A, HSPA1B, HYAL2, IGBP1, IL1A, NFATC4, PDCD7, PGAP2, PIAS4, PINK1, PLA2G6, PRKCD, REXO2, SGMS1, SIAH1, SP100, TMEM161A, TNFRSF12A, UNC5B, YBX3, ZC3HC1]
GO:2001240	negative regulation of extrinsic apoptotic signaling pathway in absence of ligand	6	17.1429	0.0311553	[CX3CL1, HSPA1A, HSPA1B, IL1A, UNC5B, ZC3HC1]
GO:2001244	positive regulation of intrinsic apoptotic signaling pathway	7	17.0732	0.0210705	[BAD, BAX, BBC3, BID, FIS1, PIAS4, SIAH1]

## Sheet: NPC_KD
GOID	GOTerm	Nr. Genes	% Associated Genes	Term PValue	Associated Genes Found
GO:0000079	regulation of cyclin-dependent protein serine/threonine kinase activity	22	22.6804	0.0163707	[APC, CCNB3, CCND3, CDC37, CDKN1C, CDKN2A, CDKN2C, FAM58A, HERC5, HEXIM1, HSPA2, KAT2B, LATS1, LONP1, MAPRE3, MEN1, MNAT1, PAK3, PDGFB, PKD1, PTEN, TNFAIP3]
GO:0000080	mitotic G1 phase	3	60	0.022992	[CDKN1C, MAP3K11, TBRG4]
GO:0000165	MAPK cascade	108	17.7049	0.00843761	[ACKR3, ALK, AMH, ANKRD6, APC, APOE, ARRB2, AXIN1, CBS, CIB1, CNKSR3, CTSH, DCC, DOK5, DUSP16, DUSP26, DUSP5, DUSP6, DUSP7, DUSP8, DVL3, EDN1, ELK1, EPHA2, EPHA7, F2R, F2RL1, FBXW7, FGF12, FGF14, FGFR4, FLCN, FZD4, GCNT2, GLIPR2, GNAI2, GPS1, GSTP1, HYAL2, IGBP1, INSR, KCNH8, KIT, KITLG, LPAR1, LRRK2, MAP2K2, MAP2K7, MAP3K11, MAP3K6, MAP3K9, MAP4K1, MAP4K3, MAPK15, MAPK3, MAPK4, MAPK7, MAPK8IP1, …
GO:0000188	inactivation of MAPK activity	8	29.6296	0.0299537	[DUSP16, DUSP5, DUSP6, DUSP7, DUSP8, GPS1, PPP2R1A, PRKCA]
GO:0000394	RNA splicing, via endonucleolytic cleavage and ligation	4	40	0.0420875	[HEXIM1, TRPT1, TSEN34, TSEN54]
GO:0000737	DNA catabolic process, endonucleolytic	15	23.8095	0.0285332	[APAF1, ARRB2, BAX, CDKN2A, DNASE2, FSCN1, H1F0, HMGA1, HMGA2, MAP1S, MUS81, NTHL1, PRELID1, SLX4, XRCC3]
GO:0000902	cell morphogenesis	224	20	2.4771325337265976E-8	[ABLIM1, ABLIM2, ACTB, ACTG1, ADCY1, AGRN, AKIP1, ALDOA, ANK3, AP2A1, AP2S1, APC, APOE, ARHGAP39, ARHGAP4, ARHGDIA, ARHGEF1, ARHGEF18, ARX, ATP2B4, ATP6V0D1, ATP7A, B9D2, BAI1, BAMBI, BCL9L, BIN3, BMP5, BRSK1, BVES, C1QBP, C21orf2, C5orf30, CACNB2, CACNB4, CDC42EP1, CDKL5, CEP89, CHN1, CIB1, CLTA, COCH, COL18A1, COL5A1, COL9A1, CORO1A, CORO1B, CXXC1, DAB1, DCC, DICER1, DLC1, DPYSL5, DVL1, E2F4, E…
GO:0000904	cell morphogenesis involved in differentiation	166	20.3931	5.131184749474123E-7	[ABLIM1, ABLIM2, ACTB, ACTG1, ADCY1, AGRN, AKIP1, ANK3, AP2A1, AP2S1, APC, APOE, ARHGAP39, ARHGAP4, ARHGDIA, ARHGEF1, ARX, ATP2B4, ATP7A, BAI1, BAMBI, BCL9L, BMP5, BRSK1, BVES, C1QBP, CACNB2, CACNB4, CDKL5, CHN1, CIB1, CLTA, COL18A1, COL5A1, COL9A1, CXXC1, DAB1, DCC, DPYSL5, DVL1, EFNA2, EPHA2, EPHA7, EPHB2, EPHB3, ETV1, FAM101B, FERMT2, FLNA, FLOT1, FOXB1, FZD3, FZD4, FZD9, GCNT2, GLI2, GLIPR2, …
GO:0001558	regulation of cell growth	65	19.2878	0.00588839	[ACSL4, AGTR1, AKAP6, APOE, ARHGAP4, BCAR1, BTG1, CD320, CDKL5, CDKN2A, CDKN2C, CFH, CIB1, CISH, CXXC1, CYBA, DCC, DDR1, DNAJC2, DNPH1, EGLN2, FAM107A, FLCN, GAS2L1, HYAL2, IGFBP2, IGFBP5, IGFBPL1, IL17RB, ING1, LIMK1, LTBP4, MAP1B, MEGF8, MUC12, NDEL1, NELL1, NOL8, NPR1, NTN1, OGFR, PAK3, PLXNA1, PML, PPP2R1A, RYK, SEMA3A, SEMA3F, SEMA7A, SFRP1, SGK3, SIPA1, SLIT1, SLIT3, SMARCA2, SMARCA4, SPOCK…
GO:0001667	ameboidal cell migration	53	19.9248	0.00630296	[AMOT, APOE, ARHGAP4, BCAR1, C1QBP, CIB1, CORO1B, CTSH, EDN1, EPHA2, GIPC1, GLIPR2, GPX1, HDAC7, HSPB1, HYAL2, ITGB3, KIT, KITLG, LAMA5, LOXL2, LRP6, MEGF8, MEN1, MYH9, NANOS1, NELL1, NELL2, NOS3, NR4A1, PDGFB, PFN1, PKN3, PPAP2B, PPM1F, PRKCA, PRKX, PRR5L, PTEN, SCARB1, SEMA3A, SEMA3C, SEMA3F, SMOX, SOX9, SRF, SRGAP3, TIMP1, TNFSF12, TWIST1, VEGFC, WNT5A, ZNF580]
GO:0001702	gastrulation with mouth forming second	10	31.25	0.0108675	[ACVR2A, AMOT, LDB2, LRP6, MEGF8, NSD1, PPAP2B, SRF, TENM4, WNT5A]
GO:0001736	establishment of planar polarity	13	32.5	0.00266375	[ANKRD6, DVL1, DVL3, FUZ, FZD3, FZD9, LRP6, MAGI2, MLLT3, RORA, SFRP1, WNT5A, ZNRF3]
GO:0001738	morphogenesis of a polarized epithelium	14	29.1667	0.00561223	[ANKRD6, DVL1, DVL3, FUZ, FZD3, FZD9, LAMA5, LRP6, MAGI2, MLLT3, RORA, SFRP1, WNT5A, ZNRF3]
GO:0001843	neural tube closure	19	22.093	0.0315208	[ADM, APAF1, DEAF1, DLC1, DVL1, DVL3, FUZ, FZD3, FZD9, GATAD2A, LRP6, PFN1, SALL1, SFRP1, TWIST1, VASP, WNT5A, ZIC2, ZIC5]
GO:0001932	regulation of protein phosphorylation	159	16.6492	0.0166828	[ACD, ACSL1, ACVR2A, ADCY1, ADCY2, ADCY6, ALK, AMH, APC, APOE, ARFGAP1, ARRB2, ATP6V0D1, AXIN1, BAX, BMP5, CACTIN, CARD10, CBS, CCNB3, CCND3, CDC25B, CDC37, CDKN1C, CDKN2A, CDKN2C, CIB1, CNKSR3, CSF1, CXXC1, DAB1, DUSP16, DUSP26, DUSP5, DUSP6, DUSP7, DUSP8, DVL1, DVL3, EDN1, EIF2S1, EPHA7, F2R, FAM129A, FAM58A, FBXW7, FECH, FLCN, FZD4, GMFB, GNAI2, GPD1L, GPS1, GSTP1, HERC5, HEXIM1, HSPA2, HSPB1,…
GO:0001933	negative regulation of protein phosphorylation	61	24.6964	7.74741660042807E-6	[APC, APOE, BAX, CACTIN, CDKN1C, CDKN2A, CDKN2C, CIB1, CNKSR3, DUSP16, DUSP26, DUSP5, DUSP6, DUSP7, DUSP8, DVL1, FAM129A, GMFB, GPD1L, GPS1, GSTP1, HEXIM1, HSPB1, HYAL2, KAT2B, LATS1, LRP6, MAPK8IP1, MEN1, MICAL1, MLLT1, MYADM, NF2, NUP62, PAK3, PDCD4, PKIA, PPAP2B, PPM1F, PPP2R1A, PRKAG2, PRKAR1A, PRKAR1B, PRKCA, PRKCD, PRR5L, PTEN, RB1, RGS14, SFRP1, SH3BP5, SMPD1, SNCA, SPRY1, STK38, TNFAIP3, …
GO:0001941	postsynaptic membrane organization	6	35.2941	0.0250884	[CHRNB1, DVL1, LLGL1, NLGN3, NRXN2, SHANK3]
GO:0001944	vasculature development	99	16.8082	0.0408848	[ACKR3, ADM, AMOT, APOE, ARHGAP24, ATP7A, BAI1, BAX, BTG1, CIB1, COL18A1, COL5A1, CTSH, DHCR7, DICER1, E2F7, E2F8, EDN1, EGFL7, EPHA2, EPHB2, EPHB3, EYA1, FBXW7, FLVCR1, FZD3, FZD4, FZD9, GATAD2A, GJA5, GNA13, GPI, GPR56, GPX1, HAS2, HDAC7, HIF1AN, HSPB1, HSPG2, ITGA5, ITGB3, JUNB, LAMA4, LAMA5, LOXL2, LYL1, MAPK7, MEN1, MIB1, MYH9, NELL1, NELL2, NOS3, NOTCH2, NOTCH3, NOTCH4, NPR1, NR4A1, NTRK2, …
GO:0001977	renal system process involved in regulation of blood volume	7	41.1765	0.00614278	[CYBA, F2R, F2RL1, GJA5, HSD11B2, PDGFB, PTPRO]
GO:0001990	regulation of systemic arterial blood pressure by hormone	11	26.1905	0.029572	[AGTR1, CYBA, ECE1, EDN1, F2R, F2RL1, GJA5, HSD11B2, NOS3, RASL10B, RPS6KA2]
GO:0002001	renin secretion into blood stream	3	60	0.022992	[F2R, F2RL1, GJA5]
GO:0002011	morphogenesis of an epithelial sheet	11	29.7297	0.0115207	[ARHGAP24, COL5A1, DDR1, DVL1, ITGA5, LRP6, MEGF8, NOTCH2, SOX11, SRF, WNT5A]
GO:0002028	regulation of sodium ion transport	14	26.4151	0.0141098	[ACTN4, ANK3, ATP2B4, CNKSR3, FGF12, FGF14, GPD1L, NANOS1, NEDD4L, NOS3, SCN3B, SIK1, SLC9A3R1, UTRN]
GO:0002062	chondrocyte differentiation	21	22.8261	0.0174539	[ADAMTS7, ARID5A, COL11A1, GLG1, GLI2, HMGA2, HSPG2, IFT80, LOXL2, LTBP3, NKX3-2, OSR2, PKDCC, PRKCA, RARB, RARG, RELA, SOX6, SOX9, SULF1, WNT9A]
GO:0002221	pattern recognition receptor signaling pathway	34	19.3182	0.0371948	[ARRB2, C1QBP, CACTIN, CNPY3, CTSL, DDX60, DUSP6, DUSP7, ELK1, F2RL1, IRF7, KCNH8, MAP2K2, MAP2K7, MAPK3, MAPK7, MYD88, NFKB1, NFKB2, NFKBIA, NFKBIB, NFKBIL1, NLRX1, PELI2, PIK3AP1, RELA, RFTN1, RPS6KA2, TICAM1, TLR9, TNFAIP3, TNIP1, TNIP2, TRIL]
GO:0002224	toll-like receptor signaling pathway	31	20.5298	0.0210872	[ARRB2, CACTIN, CNPY3, CTSL, DUSP6, DUSP7, ELK1, F2RL1, IRF7, KCNH8, MAP2K2, MAP2K7, MAPK3, MAPK7, MYD88, NFKB1, NFKB2, NFKBIA, NFKBIB, NFKBIL1, PELI2, PIK3AP1, RELA, RFTN1, RPS6KA2, TICAM1, TLR9, TNFAIP3, TNIP1, TNIP2, TRIL]
GO:0002755	MyD88-dependent toll-like receptor signaling pathway	19	22.093	0.0315208	[DUSP6, DUSP7, ELK1, IRF7, KCNH8, MAP2K2, MAP2K7, MAPK3, MAPK7, MYD88, NFKB1, NFKB2, NFKBIA, NFKBIB, PELI2, RELA, RPS6KA2, TLR9, TNIP1]
GO:0002758	innate immune response-activating signal transduction	34	18.9944	0.0459528	[ARRB2, C1QBP, CACTIN, CNPY3, CTSL, DDX60, DUSP6, DUSP7, ELK1, F2RL1, IRF7, KCNH8, MAP2K2, MAP2K7, MAPK3, MAPK7, MYD88, NFKB1, NFKB2, NFKBIA, NFKBIB, NFKBIL1, NLRX1, PELI2, PIK3AP1, RELA, RFTN1, RPS6KA2, TICAM1, TLR9, TNFAIP3, TNIP1, TNIP2, TRIL]
GO:0003044	regulation of systemic arterial blood pressure mediated by a chemical signal	12	24	0.0445229	[AGTR1, CYBA, ECE1, EDN1, F2R, F2RL1, GJA5, HSD11B2, NOS3, RASL10B, RPS6KA2, TPM1]
GO:0003062	regulation of heart rate by chemical signal	3	50	0.0411606	[KCNH2, SREBF1, TPM1]
GO:0003071	renal system process involved in regulation of systemic arterial blood pressure	8	30.7692	0.0239864	[AGTR1, CYBA, F2R, F2RL1, GJA5, HSD11B2, PDGFB, PTPRO]
GO:0003073	regulation of systemic arterial blood pressure	19	21.5909	0.0390423	[AGTR1, CYBA, ECE1, EDN1, F2R, F2RL1, GJA5, HSD11B2, IER3, MANF, NAV2, NEDD4L, NOS3, PDGFB, PLCB3, PTPRO, RASL10B, RPS6KA2, TPM1]
GO:0003093	regulation of glomerular filtration	6	50	0.00352246	[CYBA, F2R, F2RL1, GJA5, PDGFB, PTPRO]
GO:0003094	glomerular filtration	7	30.4348	0.0359046	[CYBA, F2R, F2RL1, GJA5, PDGFB, PTPRO, SULF1]
GO:0003100	regulation of systemic arterial blood pressure by endothelin	3	50	0.0411606	[ECE1, EDN1, NOS3]
GO:0003105	negative regulation of glomerular filtration	4	57.1429	0.00998895	[CYBA, F2R, GJA5, PTPRO]
GO:0006022	aminoglycan metabolic process	36	20	0.0202635	[ABCC5, AGRN, AP2A1, B3GALT6, B3GAT3, B4GALT2, CHPF, CHST1, CHST12, CHST14, CHST15, CHST2, CHST3, CHST7, CHST9, CHSY3, CLN6, CSGALNACT1, DSEL, GAL3ST3, GALNS, GCNT2, HAS2, HS3ST5, HSPG2, HYAL2, ITIH4, LONP1, NAGLU, NCAN, NFKB1, PDGFB, SDC2, SLC35D1, SPOCK2, XYLT2]
GO:0006023	aminoglycan biosynthetic process	28	25.9259	9.447022566840056E-4	[ABCC5, AGRN, AP2A1, B3GALT6, B3GAT3, B4GALT2, CHPF, CHST1, CHST12, CHST14, CHST15, CHST2, CHST3, CHST7, CHST9, CHSY3, CSGALNACT1, DSEL, GCNT2, HAS2, HS3ST5, HSPG2, NCAN, NFKB1, PDGFB, SDC2, SLC35D1, XYLT2]
GO:0006024	glycosaminoglycan biosynthetic process	28	26.4151	6.87945038018369E-4	[ABCC5, AGRN, AP2A1, B3GALT6, B3GAT3, B4GALT2, CHPF, CHST1, CHST12, CHST14, CHST15, CHST2, CHST3, CHST7, CHST9, CHSY3, CSGALNACT1, DSEL, GCNT2, HAS2, HS3ST5, HSPG2, NCAN, NFKB1, PDGFB, SDC2, SLC35D1, XYLT2]
GO:0006029	proteoglycan metabolic process	24	25.2632	0.00305376	[AGRN, B3GALT6, B3GAT3, CANT1, CHPF, CHST12, CHST14, CHST15, CHST3, CHST7, CHST9, CHSY3, COL11A1, CSGALNACT1, DSEL, GAL3ST3, HS3ST5, HSPG2, NCAN, SDC2, SLC35D1, SPOCK2, SULF1, XYLT2]
GO:0006054	N-acetylneuraminate metabolic process	4	44.4444	0.0283893	[AMDHD2, NAGK, NANP, NPL]
GO:0006066	alcohol metabolic process	67	17.4935	0.0404978	[ABCA1, ACSS1, APOC1, APOE, BMP5, CLN3, CLN6, COQ2, COQ3, CUBN, CYB5R3, CYP27A1, DAK, DHCR7, DHRS4, DHX34, DPM2, FABP5, FAM58A, FECH, G6PD, GALK1, GPCPD1, HDLBP, IMPA2, INPP5E, INSIG2, IP6K3, ITPK1, LBR, LDLRAP1, LIPE, MBOAT1, MVD, MVK, NFKB1, NUDT10, NUDT11, OCRL, OSBPL5, PCYT1B, PECR, PEMT, PLA2G12A, PLA2G15, PLA2G3, PLA2G4A, PLA2G6, PLB1, PLCB3, PNPLA6, PRKAG2, PRKCD, PTEN, RXRA, SC5D, SCARB1,…
GO:0006082	organic acid metabolic process	185	16.4884	0.014937	[ABHD14A-ACY1, ACOT2, ACOT7, ACOX2, ACSBG1, ACSF2, ACSL1, ACSL4, ACSS1, ACY1, ADC, AGRN, AIMP2, AKR1C1, ALKBH7, AMDHD2, AMH, APOC1, ATCAY, ATIC, ATP7A, B3GALT6, B3GAT3, B4GALT2, BCAT2, BCKDK, BDH2, BSG, C9orf3, CBR1, CBR4, CBS, CCBL1, CFH, CHPF, CHST1, CHST12, CHST14, CHST15, CHST2, CHST3, CHST7, CHST9, CHSY3, CLN3, CNR1, COASY, COMT, CPS1, CRABP2, CRYL1, CSGALNACT1, CTH, CYB5A, CYB5R3, CYP27A1, …
GO:0006140	regulation of nucleotide metabolic process	91	16.7897	0.0493456	[ABCA1, ACAP3, ADM, AGAP3, AGRN, AHSA1, AKAP12, AKAP5, AKAP6, AMOT, APOE, ARFGAP1, ARHGAP24, ARHGAP6, ARHGEF1, ARHGEF10L, ARHGEF16, ARHGEF17, ARHGEF18, ARHGEF19, ARL2, ARRB2, AXIN1, BVES, CBS, CDKL5, CHN1, CHN2, CPEB2, DENND3, DENND4A, DENND4B, DENND5B, DLC1, DNAJB6, EDN1, EPHA2, EPHB3, FGD3, FLCN, GIT1, GNAI2, GNAO1, GNG7, GRM3, KALRN, LLGL1, LRRK2, MAPK7, MLST8, NANOS1, NDEL1, NOS3, NPR1, NTRK2…
GO:0006152	purine nucleoside catabolic process	115	17.1642	0.0167967	[ABCA2, ACAP3, AGAP3, AGRN, AMOT, ARF1, ARFGAP1, ARHGAP24, ARHGAP6, ARHGEF1, ARHGEF10L, ARHGEF16, ARHGEF17, ARHGEF18, ARHGEF19, ARL2, ARL8A, ARRB2, ATP5D, AXIN1, BVES, CDKL5, CHD8, CHN1, CHN2, CPEB2, DDX17, DDX39B, DDX54, DENND3, DENND4A, DENND4B, DENND5B, DLC1, DNM2, DNM3, ENPP4, EPHA2, EPHB3, FGD3, GIT1, GNAO1, GNG11, GNG5, GNL3, KALRN, KATNB1, LLGL1, LRRK2, MLST8, MNAT1, MTG1, MYH10, MYH3, MYH…
GO:0006163	purine nucleotide metabolic process	172	17.2	0.00372908	[ABCA1, ABCA2, ACAP3, ACOT7, ADCY2, ADCY6, ADK, ADM, AGAP3, AGRN, AHSA1, AK4, AK5, AKAP12, AKAP5, AKAP6, ALDOA, AMOT, APOE, APRT, ARF1, ARFGAP1, ARHGAP24, ARHGAP6, ARHGEF1, ARHGEF10L, ARHGEF16, ARHGEF17, ARHGEF18, ARHGEF19, ARL2, ARL8A, ARRB2, ATIC, ATP2B4, ATP5D, ATP6V1A, AXIN1, BAD, BVES, CACNB4, CBS, CDKL5, CHD8, CHN1, CHN2, COASY, CPEB2, DCAKD, DDX17, DDX39B, DDX54, DENND3, DENND4A, DENND4B, …
GO:0006166	purine ribonucleoside salvage	3	60	0.022992	[ADK, APRT, PRTFDC1]
GO:0006184	GTP catabolic process	92	18.2903	0.00599138	[ACAP3, AGAP3, AGRN, AMOT, ARF1, ARFGAP1, ARHGAP24, ARHGAP6, ARHGEF1, ARHGEF10L, ARHGEF16, ARHGEF17, ARHGEF18, ARHGEF19, ARL2, ARL8A, ARRB2, AXIN1, BVES, CDKL5, CHN1, CHN2, CPEB2, DENND3, DENND4A, DENND4B, DENND5B, DLC1, DNM2, DNM3, EPHA2, EPHB3, FGD3, GIT1, GNAO1, GNG11, GNG5, GNL3, KALRN, LLGL1, LRRK2, MLST8, MTG1, NDEL1, NTRK2, OCRL, PGAM5, PIN1, PTGES2, RAB11B, RAB14, RAB33A, RAB3A, RAB3GAP1,…
GO:0006195	purine nucleotide catabolic process	129	17.5749	0.00549645	[ABCA2, ACAP3, AGAP3, AGRN, AHSA1, AMOT, ARF1, ARFGAP1, ARHGAP24, ARHGAP6, ARHGEF1, ARHGEF10L, ARHGEF16, ARHGEF17, ARHGEF18, ARHGEF19, ARL2, ARL8A, ARRB2, ATP5D, AXIN1, BVES, CDKL5, CHD8, CHN1, CHN2, CPEB2, DDX17, DDX39B, DDX54, DENND3, DENND4A, DENND4B, DENND5B, DLC1, DNAJB6, DNM2, DNM3, EPHA2, EPHB3, FGD3, GIT1, GNAO1, GNG11, GNG5, GNL3, GPX1, ITPA, KALRN, KATNB1, LLGL1, LRRK2, MAPK7, MLST8, MN…
GO:0006284	base-excision repair	11	25.5814	0.0347951	[HMGA1, HMGA2, KIAA2022, LRIG1, MPG, MUTYH, NTHL1, POLD1, POLD2, PRMT6, TDG]
GO:0006285	base-excision repair, AP site formation	4	50	0.0177442	[MPG, MUTYH, NTHL1, TDG]
GO:0006289	nucleotide-excision repair	20	21.5054	0.0362409	[FANCC, FSCN1, KIAA2022, LRIG1, MNAT1, NTHL1, PNKP, POLD1, POLD2, POLL, POLR2E, POLR2I, POLR2J, POLR2L, RAD23A, REV3L, SLC19A1, SLX4, UVSSA, XAB2]
GO:0006308	DNA catabolic process	21	20.5882	0.0494094	[APAF1, ARRB2, BAX, CDKN2A, DNASE2, FSCN1, H1F0, HMGA1, HMGA2, MAP1S, MNAT1, MPG, MUS81, MUTYH, NTHL1, PNKP, PRELID1, SLX4, TDG, TREX1, XRCC3]
GO:0006309	apoptotic DNA fragmentation	8	27.5862	0.0447722	[APAF1, ARRB2, BAX, CDKN2A, DNASE2, H1F0, MAP1S, PRELID1]
GO:0006355	regulation of transcription, DNA-templated	482	15.258	0.0346728	[AATF, ABCA2, ABHD14B, ABLIM1, ABLIM2, ACVR2A, AES, AGO1, AGO2, AGRN, AKAP17A, ALK, AMH, ANP32A, ARHGEF10L, ARID3A, ARID5A, ARMCX3, ARRB2, ASCC2, ASCC3, ASPH, ATF5, ATN1, ATOH8, ATRX, AXIN1, BAHD1, BAMBI, BANP, BAZ2B, BCL2L12, BCL3, BCL9L, BEX1, BEX2, BLOC1S2, BMP5, BRF1, BRMS1, BTG1, C14orf169, C1QBP, C6orf1, CACTIN, CAPN15, CAPN3, CARF, CARM1, CASZ1, CBX4, CBX5, CBX6, CCDC106, CDK9, CDKN1C, CDK…
GO:0006388	tRNA splicing, via endonucleolytic cleavage and ligation	4	44.4444	0.0283893	[HEXIM1, TRPT1, TSEN34, TSEN54]
GO:0006464	cellular protein modification process	436	15.4118	0.0256944	[ABCA1, ACD, ACSL1, ACVR2A, ADCY1, ADCY2, ADCY6, ADRBK1, AIMP2, ALG10, ALG12, ALG3, ALK, AMH, ANAPC11, APC, APOE, ARFGAP1, ARID5A, ARRB2, ARSA, ARSI, ARSJ, ASPH, ATP2B4, ATP6V0D1, ATP7A, AXIN1, B3GALT5, B3GALT6, B3GAT3, B4GALT2, BAX, BMP5, BRMS1, BRSK1, C14orf169, CACTIN, CAPN3, CARD10, CARM1, CBS, CBX4, CCNB3, CCND3, CDC14B, CDC25B, CDC37, CDK6, CDK9, CDKL5, CDKN1C, CDKN2A, CDKN2C, CIB1, CISH, C…
GO:0006468	protein phosphorylation	220	17.094	0.0014995	[ACD, ACSL1, ACVR2A, ADCY1, ADCY2, ADCY6, ADRBK1, ALK, AMH, APC, APOE, ARFGAP1, ARRB2, ATP6V0D1, AXIN1, BAX, BMP5, BRSK1, CACTIN, CARD10, CBS, CCNB3, CCND3, CDC25B, CDC37, CDK6, CDK9, CDKL5, CDKN1C, CDKN2A, CDKN2C, CIB1, CLK1, CLK3, CLK4, CNKSR3, CSF1, CSNK1G2, CTBP1, CXXC1, DAB1, DAPK3, DDR1, DUSP16, DUSP26, DUSP5, DUSP6, DUSP7, DUSP8, DVL1, DVL3, EDN1, EIF2S1, EPHA2, EPHA7, EPHB2, EPHB3, ERC1, …
GO:0006469	negative regulation of protein kinase activity	48	26.2295	1.3038301204010285E-5	[APC, APOE, CDKN1C, CDKN2A, CDKN2C, DUSP16, DUSP26, DUSP5, DUSP6, DUSP7, DUSP8, DVL1, GMFB, GPS1, GSTP1, HEXIM1, HSPB1, HYAL2, KAT2B, LATS1, LRP6, MAPK8IP1, MEN1, MLLT1, NF2, NUP62, PAK3, PDCD4, PKIA, PPM1F, PPP2R1A, PRKAG2, PRKAR1A, PRKAR1B, PRKCA, PRKCD, PTEN, RB1, RGS14, SFRP1, SH3BP5, SMPD1, SPRY1, STK38, TNFAIP3, UBASH3B, ZGPAT, ZNF675]
GO:0006489	dolichyl diphosphate biosynthetic process	3	60	0.022992	[DOLPP1, MVD, SRD5A3]
GO:0006491	N-glycan processing	4	40	0.0420875	[GNPTG, MAN2A1, MGAT4A, MGAT4B]
GO:0006575	cellular modified amino acid metabolic process	40	18.7793	0.0383689	[ATIC, CBS, CCBL1, COASY, COMT, CPS1, CTH, DOHH, EGLN2, EGLN3, FASN, FPGS, G6PD, GAMT, GGACT, GGT7, GPX1, GPX4, GSTA4, GSTM2, GSTM3, GSTP1, HAGHL, MBOAT1, MGST1, NOX4, P4HA2, P4HB, PANK2, PLA2G12A, PLA2G4A, PLOD1, PPCS, PTDSS2, SERINC1, SERINC2, SERINC5, SLC19A1, SLC25A32, STAT5A]
GO:0006576	cellular biogenic amine metabolic process	29	20.4225	0.0267229	[ADC, APOC1, ATP7A, CCBL1, CLN3, FABP5, MAOA, MBOAT1, PCYT1B, PEMT, PLA2G12A, PLA2G15, PLA2G3, PLA2G4A, PLA2G6, PLB1, PNPLA6, PRKCD, RAI1, SAT2, SCARB1, SH2D3C, SLC25A21, SMOX, SMPD1, SMPD2, SMS, SPTLC2, SRM]
GO:0006596	polyamine biosynthetic process	6	37.5	0.0184017	[ADC, RAI1, SLC25A21, SMOX, SMS, SRM]
GO:0006629	lipid metabolic process	204	15.8385	0.047464	[ABCA1, ABCA2, ABHD4, ACD, ACOT2, ACOT7, ACOX2, ACSBG1, ACSF2, ACSL1, ACSL4, ACSS1, ADM, AGPAT2, AGRN, AGTR1, AKR1C1, ALKBH7, AMH, APOC1, APOE, ARF1, ARSA, ARSI, ARSJ, BAX, BDH1, BDH2, BMP5, BSCL2, BTN2A1, C9orf3, CARM1, CBR1, CBR4, CDS2, CERS6, CLN3, CLN6, CLU, CNR1, COLGALT1, COMT, COQ2, CPS1, CRABP2, CRYL1, CSNK1G2, CUBN, CYB5R3, CYP27A1, CYP2D6, CYP2U1, DAGLA, DGKZ, DHCR7, DHRS4, DOLPP1, DPM2…
GO:0006631	fatty acid metabolic process	63	17.9487	0.028906	[ACOT2, ACOT7, ACOX2, ACSBG1, ACSF2, ACSL1, ACSL4, ACSS1, ALKBH7, AMH, APOC1, BDH2, C9orf3, CBR1, CBR4, CNR1, CRYL1, CYP2U1, DAGLA, ECH1, ECHDC2, ECI1, EDN1, FABP3, FAM213B, FAM3A, FASN, FAXDC2, GGT7, GPX1, GPX4, HSD17B12, INSIG2, IRS1, LIPE, LPL, LYPLA2, MID1IP1, MIF, MMAA, MYO5A, NDUFAB1, NR1H2, PDK3, PDPN, PECR, PLA2G15, PLA2G4A, PLP1, PRKAG2, PTGES2, RNPEPL1, SC5D, SCD5, SCP2, SIRT4, SLC27A4,…
GO:0006638	neutral lipid metabolic process	26	21.3115	0.0210976	[ACSL1, ACSL4, AGPAT2, APOC1, APOE, CPS1, DAGLA, FASN, FBXW7, FITM2, GPD1L, GPX1, HSD17B12, INSIG2, LIPE, LPL, NR1H2, PNPLA2, PPP1CA, PRKCA, SCARB1, SIK1, SLC25A1, SNCA, SREBF1, TSPO]
GO:0006639	acylglycerol metabolic process	25	20.6612	0.0331289	[ACSL1, ACSL4, AGPAT2, APOC1, APOE, CPS1, DAGLA, FASN, FBXW7, FITM2, GPD1L, GPX1, HSD17B12, INSIG2, LIPE, LPL, NR1H2, PNPLA2, PPP1CA, PRKCA, SCARB1, SIK1, SLC25A1, SREBF1, TSPO]
GO:0006641	triglyceride metabolic process	24	20.8696	0.0326056	[ACSL1, ACSL4, AGPAT2, APOC1, APOE, CPS1, FASN, FBXW7, FITM2, GPD1L, GPX1, HSD17B12, INSIG2, LIPE, LPL, NR1H2, PNPLA2, PPP1CA, PRKCA, SCARB1, SIK1, SLC25A1, SREBF1, TSPO]
GO:0006644	phospholipid metabolic process	61	19.4888	0.00593409	[AGPAT2, APOC1, ARF1, CDS2, CLN3, DOLPP1, DPM2, DPM3, ETNK2, FABP3, FABP5, GPAA1, GPCPD1, GPD1L, GPX4, IMPA2, INPP5E, IP6K3, LPGAT1, LPL, MBOAT1, MBOAT7, MVD, MVK, NAPEPLD, OCRL, PCYT1B, PCYT2, PDGFB, PEMT, PGAP1, PIGQ, PIGT, PIK3R2, PIK3R3, PIP5K1C, PLA2G12A, PLA2G15, PLA2G3, PLA2G4A, PLA2G6, PLB1, PLD3, PNPLA2, PNPLA6, PPAP2B, PRKCD, PTDSS2, PTEN, SCARB1, SERINC1, SERINC2, SERINC5, SH2D3C, SMPD…
GO:0006684	sphingomyelin metabolic process	5	35.7143	0.03818	[CLN3, PRKCD, SMPD1, SMPD2, SPTLC2]
GO:0006732	coenzyme metabolic process	40	18.4332	0.0493711	[ACOT2, ACOT7, ACSL1, ACSL4, ACSS1, ATIC, COASY, COQ2, COQ3, DCAKD, FAM3A, FASN, FLAD1, FPGS, G6PD, GPD1L, H6PD, HSD17B12, MCCC2, MDH2, MVK, NADK2, NAPRT1, NMNAT1, NUDT7, PANK2, PCBD1, PDK3, PGAM1, PGLS, PNP, PPCS, QPRT, SLC19A1, SLC25A1, SLC25A32, SNCA, SPR, THTPA, TKT]
GO:0006753	nucleoside phosphate metabolic process	202	17.1769	0.00184576	[ABCA1, ABCA2, ACAP3, ACOT7, ADCY1, ADCY2, ADCY6, ADK, ADM, AGAP3, AGRN, AHSA1, AK4, AK5, AKAP12, AKAP5, AKAP6, ALDOA, AMOT, APOE, APRT, ARF1, ARFGAP1, ARHGAP24, ARHGAP6, ARHGEF1, ARHGEF10L, ARHGEF16, ARHGEF17, ARHGEF18, ARHGEF19, ARL2, ARL8A, ARRB2, ATIC, ATP2B4, ATP5D, ATP6V1A, AXIN1, BAD, BVES, CACNB4, CBS, CDKL5, CHD8, CHN1, CHN2, COASY, CPEB2, CSGALNACT1, DCAKD, DCTPP1, DDX17, DDX39B, DDX54,…
GO:0006767	water-soluble vitamin metabolic process	23	23.2323	0.0107664	[CD320, COASY, CUBN, CYB5A, CYB5R3, FASN, FLAD1, FPGS, MCCC2, MIF, MMAA, MMAB, MTR, NAPRT1, NMNAT1, PANK2, PPCS, QPRT, SLC19A1, SLC25A32, SLC2A3, TCN2, THTPA]
GO:0006790	sulfur compound metabolic process	54	19.9262	0.00586352	[AGRN, B3GALT6, B3GAT3, B4GALT2, CBS, CHPF, CHST1, CHST12, CHST14, CHST15, CHST2, CHST3, CHST7, CHST9, CHSY3, COMT, CPS1, CSGALNACT1, CTH, DSEL, G6PD, GAL3ST3, GALNS, GGT7, GPX1, GPX4, GSTA4, GSTM2, GSTM3, GSTP1, HAGHL, HS3ST5, HSPG2, MCCC2, MGST1, MICAL1, MPST, MSRA, MTR, NCAN, NOX4, RAI1, SDC2, SLC25A10, SLC35D1, SMS, SPOCK2, STAT5A, SULF1, SULT4A1, THTPA, TPST2, TST, XYLT2]
GO:0006793	phosphorus metabolic process	525	16.7893	3.6952784721195137E-6	[ABCA1, ABCA2, ACAP3, ACD, ACKR3, ACOT2, ACOT7, ACSL1, ACSL4, ACSS1, ACVR2A, ADCY1, ADCY2, ADCY6, ADK, ADM, ADRBK1, AGAP3, AGPAT2, AGRN, AHSA1, AK4, AK5, AKAP12, AKAP5, AKAP6, ALDOA, ALDOC, ALK, AMH, AMOT, ANKRD6, APC, APLN, APOC1, APOE, APRT, ARF1, ARFGAP1, ARHGAP24, ARHGAP6, ARHGEF1, ARHGEF10L, ARHGEF16, ARHGEF17, ARHGEF18, ARHGEF19, ARL2, ARL8A, ARRB2, ATIC, ATP2B4, ATP5D, ATP6V0D1, ATP6V1A, A…
GO:0006796	phosphate-containing compound metabolic process	519	16.8288	3.2320219546720494E-6	[ABCA1, ABCA2, ACAP3, ACD, ACKR3, ACOT7, ACSL1, ACVR2A, ADCY1, ADCY2, ADCY6, ADK, ADM, ADRBK1, AGAP3, AGPAT2, AGRN, AHSA1, AK4, AK5, AKAP12, AKAP5, AKAP6, ALDOA, ALDOC, ALK, AMH, AMOT, ANKRD6, APC, APLN, APOC1, APOE, APRT, ARF1, ARFGAP1, ARHGAP24, ARHGAP6, ARHGEF1, ARHGEF10L, ARHGEF16, ARHGEF17, ARHGEF18, ARHGEF19, ARL2, ARL8A, ARRB2, ATIC, ATP2B4, ATP5D, ATP6V0D1, ATP6V1A, ATP7A, AXIN1, BAD, BAX…
GO:0006814	sodium ion transport	33	20.7547	0.0152435	[ACTN4, ANK3, ASIC3, ATP1B1, ATP1B3, ATP2B4, CNKSR3, FGF12, FGF14, GPD1L, HCN1, KIAA1919, NANOS1, NEDD4L, NOS3, SCN11A, SCN1A, SCN2A, SCN3A, SCN3B, SCN7A, SHROOM2, SIK1, SLC20A2, SLC22A5, SLC38A10, SLC38A3, SLC4A4, SLC4A5, SLC8A1, SLC9A3R1, SLC9A5, UTRN]
GO:0006869	lipid transport	46	19.4093	0.0163811	[ABCA1, ABCA2, ABCA5, ACSL1, ACSL4, AKR1C1, AMH, APOC1, APOE, APOM, ATP10D, ATP11B, ATP9A, CLU, FABP3, FAM58A, FZD4, GLTPD1, HDLBP, ITGB3, LDLRAP1, LRP6, MIF, NFKB1, NFKBIA, NR1H2, OSBP2, OSBPL5, PITPNM1, PLA2G4A, PLA2G6, PLA2R1, PRELID1, PRKAG2, PRKCD, REPIN1, SCARB1, SCP2, SIGMAR1, SLC27A4, SLC9A3R1, SPNS1, STARD5, STRA6, TSPO, VPS51]
GO:0006898	receptor-mediated endocytosis	36	21.3018	0.00773821	[ACKR3, ADM, ADRBK1, ADRBK2, APOC1, APOE, ARF1, ARRB2, CLN3, CUBN, DNM2, FCHO1, KIF3A, LDLRAD3, LDLRAP1, LLGL1, LRP3, LRP6, LRP8, MAGI2, MAPK3, MICALL1, MLC1, NEDD4L, NLGN3, PDLIM7, PICK1, PIP5K1C, PLA2R1, RABEPK, SCARB1, SCARF1, SNCA, SSC5D, TNK2, ULK1]
GO:0006915	apoptotic process	300	16.9683	3.3912265877538507E-4	[AATF, ACKR3, ACTN1, ACTN2, ACTN4, ADAMTSL4, ADM, AES, AGRN, AIMP2, ALDOC, ALK, AMH, ANXA5, APAF1, APC, APOE, ARHGAP4, ARHGDIA, ARHGEF16, ARHGEF17, ARHGEF18, ARRB2, ATAD3A, ATCAY, ATF5, ATG4D, ATN1, ATP7A, AXIN1, BAD, BAG3, BAX, BCAR1, BCL2L12, BCL2L13, BCL2L14, BCL3, BCL7C, BEX1, BEX2, BID, BLOC1S2, BMP5, BOK, BRMS1, BTG1, C1QBP, C6orf120, CAPN10, CAPN3, CARD10, CARD8, CBS, CBX4, CD248, CDKN2A, …
GO:0006919	activation of cysteine-type endopeptidase activity involved in apoptotic process	22	24.4444	0.00675048	[APAF1, BAD, BAX, BCL2L13, BID, BOK, CARD8, CDKN2A, CRADD, DLC1, EGLN3, F2R, FASN, IFI27, NLRP1, PIDD, PML, PRELID1, RPS27L, SENP1, SNCA, TRAF2]
GO:0006928	cellular component movement	292	17.8375	9.962624509353377E-6	[ABHD6, ABLIM1, ABLIM2, ACTB, ACTG1, ACTN1, ACTN2, ACTN4, AGRN, AGTR1, AKAP3, AMOT, ANK3, AP2A1, AP2S1, AP3D1, APC, APOE, ARHGAP24, ARHGAP39, ARHGAP4, ARHGDIA, ARHGEF16, ARPC1B, ARPC5, ARRB2, ARX, ASTN1, ATN1, ATP1B1, ATP1B3, BAMBI, BAX, BCAR1, BLOC1S2, BMP5, BSG, BTG1, C1QBP, CABYR, CACNB2, CACNB4, CAPZA2, CD151, CD248, CDK6, CDKL5, CHN1, CIB1, CLN3, CLTA, CNN2, CNOT6, COL18A1, COL5A1, COL9A1, C…
GO:0006935	chemotaxis	121	17.768	0.00492182	[ABLIM1, ABLIM2, ACKR3, ACTB, ACTG1, AGRN, AGTR1, AMH, AMOT, ANK3, AP2A1, AP2S1, ARHGAP39, ARHGEF16, ARRB2, ARX, BCAR1, C1QBP, CACNB2, CACNB4, CHN1, CLTA, CMTM1, CMTM3, CNOT6, COL5A1, COL9A1, CORO1A, CORO1B, CXXC1, DCC, DEAF1, DHX34, DPYSL5, DVL1, EDN1, EFNA2, ENC1, EPHA2, EPHA7, EPHB2, EPHB3, ETV1, F2RL1, FZD3, FZD9, GLI2, HSPB1, ITGA5, ITGB3, KIAA1598, KIT, LIMK1, LLGL1, LMNB2, LPAR1, MAP2K2, M…
GO:0006996	organelle organization	440	16.035	0.00175244	[ABCA1, ABLIM1, ABLIM2, ACD, ACTB, ACTG1, ACTN1, ACTN4, ADD2, ALDOA, ALKBH7, AMOT, ANAPC11, ANAPC15, ANK3, AP2S1, APC, APOE, ARF1, ARFGAP1, ARHGAP4, ARHGAP6, ARHGEF10L, ARHGEF17, ARHGEF18, ARHGEF19, ARID5A, ARL2, ARL8A, ARPC1B, ARPC5, ARRB2, ATCAY, ATG9B, ATP2B4, ATP6V0C, ATP6V0D1, ATP6V0E2, ATP6V1A, ATP7A, ATRX, AURKAIP1, AXIN1, B9D2, BAD, BAHD1, BAIAP2L2, BANP, BAX, BCAR1, BCS1L, BID, BIN3, BLO…
GO:0007005	mitochondrion organization	62	18.7879	0.0123121	[ALKBH7, ARRB2, ATCAY, ATP7A, AURKAIP1, BAD, BAX, BCS1L, BID, BLOC1S2, C1QBP, CDKN2A, CHCHD6, CLU, CLUH, DHODH, DLGAP3, EARS2, EYA1, FLCN, GDAP1, GFER, GPX1, IER3, IFIT2, INF2, LONP1, LRRK2, MALSU1, MAN2A1, MARCH5, MCL1, MRPL12, MTERFD2, MTFR2, MTG1, NDUFAF3, NDUFAF6, NDUFS7, NDUFS8, NOS3, PAM16, PANK2, PLA2G6, POLRMT, PRELID1, PVRL2, RAB3A, RHOT2, SDHAF1, SEPT4, SHARPIN, SIVA1, SLC25A6, SNCA, TH…
GO:0007010	cytoskeleton organization	177	18.8298	3.498092803184718E-5	[ABLIM1, ABLIM2, ACTG1, ACTN1, ACTN4, ADD2, ALDOA, AMOT, ANK3, APC, APOE, ARF1, ARHGAP4, ARHGAP6, ARHGEF10L, ARHGEF17, ARHGEF18, ARHGEF19, ARL2, ARPC1B, ARPC5, AXIN1, BAIAP2L2, BCAR1, BIN3, BLOC1S2, BRSK1, C21orf2, CAPN10, CAPN3, CAPZA2, CASC5, CEP68, CFLAR, CIB1, CNN1, CNN2, CORO1A, CORO1B, CORO2A, CORO6, CORO7, CROCC, DAAM1, DAAM2, DAPK3, DBN1, DICER1, DISC1, DLC1, DNAJB6, DVL1, EDN1, EHD2, EPB…
GO:0007015	actin filament organization	58	21.3235	8.775699969307707E-4	[ACTN1, ACTN4, ADD2, ALDOA, AMOT, ARF1, ARHGAP6, ARHGEF10L, ARPC1B, ARPC5, BCAR1, BIN3, CAPZA2, CORO1A, CORO1B, DBN1, DLC1, F2RL1, FHOD1, FHOD3, FLNA, FSCN1, JMY, KANK1, KPTN, LATS1, LIMK1, LRRC16A, MICAL1, MICALL2, MLST8, MYADM, MYO1B, NCK2, NF2, NOX4, PAK3, PDLIM3, PDXP, PFN1, PICK1, PLEKHH2, PPM1F, PRKCD, RND1, SFRP1, SHANK3, SHROOM2, SHROOM4, SORBS3, SPTBN2, SRF, TNFAIP1, TPM1, TRIOBP, TWF2, …
GO:0007016	cytoskeletal anchoring at plasma membrane	5	38.4615	0.0277156	[ANK3, EPB41L3, JUP, PIP5K1C, TLN1]
GO:0007043	cell-cell junction assembly	23	26.7442	0.00166565	[ACTN4, AMOT, APC, ARL2, EPB41L3, F11R, FBF1, FLCN, FRMPD2, GJA5, HDAC7, JUP, MICALL2, MPP5, MPP7, MYO1C, NEDD4L, PARD6A, PRKCA, PTPRO, SRF, TLN1, UGT8]
GO:0007044	cell-substrate junction assembly	19	25.6757	0.00654116	[ACTN1, ACTN2, ARHGAP6, CD151, DLC1, FERMT2, GPM6B, ITGA5, ITGB3, LAMA4, LAMA5, PLEC, PPM1F, PTEN, PXDN, SFRP1, TESK2, TLN1, TRIP6]
GO:0007045	cell-substrate adherens junction assembly	13	23.6364	0.0419247	[ACTN1, ACTN2, ARHGAP6, DLC1, FERMT2, GPM6B, LAMA5, PPM1F, PTEN, PXDN, SFRP1, TESK2, TRIP6]
GO:0007050	cell cycle arrest	45	18.6722	0.0322646	[AMH, APC, CAB39L, CDK6, CDK9, CDKN1C, CDKN2A, CDKN2C, CRADD, E4F1, GAS2L1, HBP1, HMGA2, JMY, KAT2B, KMT2E, MAGI2, MDM2, MDM4, MED25, MEN1, MIF, MYBBP1A, NOTCH2, PAK3, PIDD, PKD1, PML, PPP2R3B, PRKAG2, PRKCA, PSMB10, PSMF1, RB1, RBM38, RPTOR, SESN1, SGSM3, SOX2, STK11, TBRG4, TP53INP1, UHMK1, WDR6, ZNF268]
GO:0007154	cell communication	846	15.1885	0.00577321	[A2M, AATF, ABCA1, ABHD6, ACAP3, ACD, ACKR3, ACSBG1, ACSL1, ACTB, ACTG1, ACTN2, ACVR2A, ADAM11, ADAM12, ADC, ADCY1, ADCY2, ADCY6, ADM, ADRBK1, ADRBK2, AES, AGAP3, AGO1, AGO2, AGPAT2, AGRN, AGTR1, AKAP12, AKAP17A, AKAP3, AKAP5, AKAP6, AKAP9, AKR1C1, ALK, AMH, AMOT, ANK3, ANKDD1A, ANKRD6, ANP32A, ANXA5, AP2A1, AP2S1, AP3D1, APAF1, APBA2, APBA3, APC, APLN, APOE, ARF1, ARFGAP1, ARHGAP19, ARHGAP23, AR…
GO:0007155	cell adhesion	188	17.8199	4.465602061257961E-4	[AATF, ACKR3, ACTN1, ACTN2, ADAM12, AEBP1, AKIP1, ANK3, APC, ARHGAP6, ARHGDIA, ARL2, ASTN1, ATP1B1, BAI1, BCAR1, BCAT2, BVES, C1QBP, CCDC80, CD151, CD164, CDHR1, CDK6, CDKN2A, CIB1, CNKSR3, CNTNAP2, COL11A1, COL18A1, COL26A1, COL5A1, CORO1A, CPXM1, CSF1, CXXC1, DAB1, DDR1, DEAF1, DLC1, DLG5, DNAJB6, DUSP26, EMILIN1, EMILIN2, EMP2, EPCAM, EPHA2, EPHA7, EPHB3, ERF, F11R, F8, FERMT2, FLCN, FLRT1, FZ…
GO:0007164	establishment of tissue polarity	13	32.5	0.00266375	[ANKRD6, DVL1, DVL3, FUZ, FZD3, FZD9, LRP6, MAGI2, MLLT3, RORA, SFRP1, WNT5A, ZNRF3]
GO:0007165	signal transduction	769	15.5009	0.0010871	[A2M, AATF, ABCA1, ABHD6, ACAP3, ACD, ACKR3, ACSL1, ACTB, ACTG1, ACVR2A, ADAM11, ADAM12, ADC, ADCY1, ADCY2, ADCY6, ADM, ADRBK1, ADRBK2, AES, AGAP3, AGO1, AGO2, AGPAT2, AGRN, AGTR1, AKAP12, AKAP17A, AKAP3, AKAP5, AKAP6, AKAP9, AKR1C1, ALK, AMH, AMOT, ANK3, ANKDD1A, ANKRD6, ANP32A, ANXA5, AP2A1, AP2S1, APAF1, APC, APLN, APOE, ARF1, ARFGAP1, ARHGAP19, ARHGAP23, ARHGAP24, ARHGAP33, ARHGAP39, ARHGAP4,…
GO:0007167	enzyme linked receptor protein signaling pathway	186	18.7311	3.0204796296168758E-5	[AATF, ACVR2A, ADAM12, ADCY1, ADCY2, ADCY6, ADRBK1, AGO1, AGO2, AKAP3, ALK, AP2A1, AP2S1, ARHGAP4, ARHGDIA, ARHGEF1, ARHGEF16, ARHGEF17, ARHGEF18, ARRB2, ATP6V0C, ATP6V0D1, ATP6V0E2, ATP6V1A, AXIN1, BAD, BAMBI, BCAR1, BCL9L, BMP5, CAB39L, CD109, CDK9, CDKN1C, CGN, CHN1, CISH, CLTA, CSRNP1, DDR1, DNAL4, DOK1, DOK5, DUSP6, DUSP7, E2F4, ECSIT, EFNA2, EIF4EBP1, ELK1, EPHA2, EPHA7, EPHB2, EPHB3, EPN1,…
GO:0007169	transmembrane receptor protein tyrosine kinase signaling pathway	136	19.1819	1.2153124640772769E-4	[AATF, ADAM12, ADCY1, ADCY2, ADCY6, ADRBK1, AGO1, AGO2, ALK, AP2A1, AP2S1, ARHGAP4, ARHGDIA, ARHGEF1, ARHGEF16, ARHGEF17, ARHGEF18, ATP6V0C, ATP6V0D1, ATP6V0E2, ATP6V1A, BAD, BCAR1, BMP5, CAB39L, CHN1, CISH, CLTA, CSRNP1, DDR1, DNAL4, DOK1, DOK5, DUSP6, DUSP7, EFNA2, EIF4EBP1, ELK1, EPHA2, EPHA7, EPHB2, EPHB3, EPN1, FBXW7, FGD3, FGF12, FGF14, FGFR4, FIBP, FRS3, FURIN, FZD4, HGS, HSPB1, IGFBP2, IG…
GO:0007173	epidermal growth factor receptor signaling pathway	46	19.4915	0.015244	[ADAM12, ADCY1, ADCY2, ADCY6, ADRBK1, AGO1, AGO2, AP2A1, AP2S1, BAD, BCAR1, CLTA, EPN1, FBXW7, FGFR4, HGS, IRS1, ITPR3, KIT, KITLG, MAP2K2, MAPK3, MDM2, MLST8, NCK2, NR4A1, NUP62, PAG1, PAK3, PDE1A, PDGFB, PIK3R2, PRKAR1A, PRKAR1B, PRKCA, PRKCD, PTEN, PXDN, RHBDF1, SHC3, SOX9, SPRY1, STAM2, THEM4, TNRC6B, ZGPAT]
GO:0007178	transmembrane receptor protein serine/threonine kinase signaling pathway	56	18.6046	0.0200206	[ACVR2A, AKAP3, ARHGEF18, ARRB2, AXIN1, BAMBI, BCL9L, BMP5, CD109, CDK9, CDKN1C, CGN, E2F4, ECSIT, F11R, FBN1, FBN2, FERMT2, FKBP8, FLCN, FURIN, GCNT2, GDF15, GIPC1, GLG1, GPI, JUNB, LTBP3, LTBP4, MAGI2, MAPK3, MEGF8, MEN1, NBL1, NCOR2, NEDD4L, NREP, PARD6A, PCSK6, PDGFB, PIN1, PML, PPP1CA, RGMB, SFRP1, SMAD5, SOX11, STK11, STUB1, SULF1, TFDP2, TGFB1I1, USP9Y, VWC2L, WNT5A, ZCCHC12]
GO:0007179	transforming growth factor beta receptor signaling pathway	40	20.8333	0.00768113	[ARHGEF18, ARRB2, AXIN1, BAMBI, BCL9L, CD109, CDK9, CDKN1C, CGN, E2F4, F11R, FBN1, FBN2, FERMT2, FLCN, FURIN, GCNT2, GDF15, GIPC1, GLG1, GPI, JUNB, LTBP3, LTBP4, MEN1, NCOR2, NEDD4L, NREP, PARD6A, PDGFB, PIN1, PML, PPP1CA, SMAD5, SOX11, STK11, STUB1, TFDP2, TGFB1I1, USP9Y]
GO:0007249	I-kappaB kinase/NF-kappaB signaling	50	21.0084	0.00264532	[ADC, BCL3, C1QTNF3, CANT1, CAPN3, CARD8, CC2D1A, CFLAR, CTH, ERC1, F2R, F2RL1, FLNA, GSTP1, HSPB1, LITAF, LPAR1, MALT1, MAP3K14, MYD88, NDFIP1, NFKBIA, NFKBIL1, NLRX1, NUP62, PELI2, PLK2, RBCK1, RELA, RNF31, RORA, SHARPIN, SHISA5, TIAF1, TICAM1, TLR9, TNFAIP3, TNFRSF19, TNIP1, TNIP2, TRAF3IP2, TRIM22, TRIM59, TRIM62, TRIM8, TRIP6, UACA, VAPA, ZNF268, ZNF675]
GO:0007264	small GTPase mediated signal transduction	146	20.5634	1.5657849329152562E-6	[A2M, ABCA1, ACAP3, AGAP3, AGRN, AGTR1, AMOT, APOE, ARF1, ARFGAP1, ARHGAP19, ARHGAP23, ARHGAP24, ARHGAP33, ARHGAP39, ARHGAP4, ARHGAP44, ARHGAP6, ARHGDIA, ARHGEF1, ARHGEF10L, ARHGEF16, ARHGEF17, ARHGEF18, ARHGEF19, ARL10, ARL15, ARL2, ARL5B, ARL8A, BVES, CDC42EP1, CDKL5, CDKN2A, CHN1, CHN2, CSF1, DAB1, DENND3, DENND4A, DENND4B, DENND5B, DGKZ, DLC1, DOCK3, DOK1, DOK3, EPHA2, EPHB3, F2R, F2RL1, FAM1…
GO:0007265	Ras protein signal transduction	91	20.4494	1.7626453131539558E-4	[ABCA1, ACAP3, AGAP3, AGRN, AGTR1, APOE, ARFGAP1, ARHGAP24, ARHGAP4, ARHGAP6, ARHGDIA, ARHGEF1, ARHGEF10L, ARHGEF16, ARHGEF19, BVES, CDC42EP1, CDKL5, CDKN2A, CHN1, CSF1, DENND3, DENND4A, DENND4B, DENND5B, DGKZ, DLC1, DOK1, DOK3, EPHA2, EPHB3, F2R, F2RL1, FGD3, FLCN, FLOT1, GIT1, GNA13, GPR56, KANK1, KITLG, LIMK1, LLGL1, LPAR1, MAP2K2, MAPK3, MLST8, MYO9B, NDEL1, NOTCH2, NTRK2, NUP62, OCRL, OGT, P…
GO:0007266	Rho protein signal transduction	44	22.7979	8.648051110484253E-4	[ABCA1, AGRN, AGTR1, APOE, ARHGAP24, ARHGAP4, ARHGAP6, ARHGDIA, ARHGEF1, ARHGEF10L, ARHGEF16, ARHGEF19, BVES, CDC42EP1, CDKL5, CHN1, DLC1, EPHA2, EPHB3, F2R, F2RL1, FGD3, FLCN, FLOT1, GNA13, GPR56, KANK1, LIMK1, LPAR1, MLST8, MYO9B, NDEL1, NTRK2, OCRL, PIN1, RHOB, RHOG, SFRP1, SPATA13, SRGAP3, STMN3, SYDE1, TAX1BP3, TNFAIP1]
GO:0007275	multicellular organismal development	709	15.5824	0.00110217	[AATF, ABLIM1, ABLIM2, ACD, ACKR3, ACSBG1, ACSL4, ACTB, ACTG1, ACVR2A, ADAM19, ADAMTS4, ADAMTS7, ADCY1, ADD2, ADM, ADRBK1, AEBP1, AES, AGO2, AGPAT2, AGRN, AGTR1, AIMP2, AK4, AKAP6, ALDOC, ALK, AMH, AMOT, ANK3, ANKRD6, AP2A1, AP2S1, AP3D1, APAF1, APBA2, APBA3, APC, APLN, APOE, APRT, ARHGAP24, ARHGAP39, ARHGAP4, ARHGDIA, ARHGEF1, ARID5A, ARRB2, ARSA, ARX, ASPH, ASTN1, ATCAY, ATF5, ATIC, ATN1, ATOH8…
GO:0007399	nervous system development	365	18.1052	1.2343504039457905E-7	[ABLIM1, ABLIM2, ACD, ACSBG1, ACSL4, ACTB, ACTG1, ADCY1, ADM, AGRN, AK4, ALK, ANK3, AP2A1, AP2S1, APAF1, APBA2, APC, APOE, ARHGAP39, ARHGAP4, ARHGDIA, ARHGEF1, ARRB2, ARSA, ARX, ASTN1, ATCAY, ATF5, ATIC, ATN1, ATOH8, ATP2B4, ATP6V0D1, ATP7A, ATRX, AXIN1, BAG3, BAI1, BAX, BDH1, BEX1, BEX2, BID, BLOC1S2, BMP5, BOK, BRSK1, CACNB2, CACNB4, CBS, CDK6, CDKL5, CDKN1C, CDKN2C, CHD6, CHERP, CHN1, CIB1, CL…
GO:0007409	axonogenesis	114	19.7917	1.1815556664693488E-4	[ABLIM1, ABLIM2, ACTB, ACTG1, ADCY1, AGRN, ANK3, AP2A1, AP2S1, APC, APOE, ARHGAP39, ARHGAP4, ARHGDIA, ARHGEF1, ARX, BAI1, BRSK1, CACNB2, CACNB4, CDKL5, CHN1, CLTA, COL5A1, COL9A1, CXXC1, DAB1, DCC, DPYSL5, DVL1, EFNA2, EPHA7, EPHB2, EPHB3, ETV1, FLOT1, FOXB1, FZD3, FZD9, GLI2, ITGA5, ITGB3, KIAA1598, LIMK1, LLGL1, LMNB2, LRRC4C, MAP1B, MAP2K2, MAPK3, MAPK8IP3, MEGF8, METRN, MYH10, MYH9, MYL9, NCA…
GO:0007411	axon guidance	82	20.2469	4.97777312089881E-4	[ABLIM1, ABLIM2, ACTB, ACTG1, AGRN, ANK3, AP2A1, AP2S1, ARHGAP39, ARX, CACNB2, CACNB4, CHN1, CLTA, COL5A1, COL9A1, DCC, DPYSL5, DVL1, EFNA2, EPHA7, EPHB2, EPHB3, ETV1, FZD3, FZD9, GLI2, ITGA5, ITGB3, KIAA1598, LIMK1, LLGL1, LMNB2, MAP2K2, MAPK3, MAPK8IP3, MEGF8, MYH10, MYH9, MYL9, NCAM1, NCAN, NCK2, NELL1, NELL2, NEO1, NTN1, NTN4, PIP5K1C, PLXNA1, PLXNA2, PTPRO, PVRL1, RGMB, RHOB, RHOG, RND1, RPS…
GO:0007507	heart development	77	17.1111	0.0464228	[ADAM19, ADM, ADRBK1, AKAP6, CACYBP, COL11A1, COL5A1, DICER1, DLC1, DUSP6, DVL1, DVL3, ECE1, EDN1, EYA1, FBN1, FGF12, FOXP4, GJA5, GLI2, GNA11, HAS2, HEXIM1, HSPG2, ID3, INSR, JUP, KIF3A, LRP6, LY6E, MEGF8, MIB1, MNAT1, MOSPD3, MTERFD2, MYH10, MYH7, NCOR2, NELL1, NELL2, NEXN, NOTCH2, NOX4, NPY1R, OBSL1, PARVA, PDGFB, PDLIM3, PKD1, POFUT1, PRKAR1A, PTEN, RARB, RPS6KA2, RXRA, RXRB, SALL1, SCUBE1, S…
GO:0007568	aging	47	19.4215	0.0152249	[ADM, ALDOC, AMH, APOE, CACYBP, CDK6, CDKN2A, CNR1, CTSC, CTSV, EDN1, GNAO1, GPX1, GPX4, HMGA1, HMGA2, HYAL2, IGFBP2, JUND, LITAF, LONP1, LOXL2, LRRK2, MARCH5, MIF, MMAB, NOX4, NTRK2, NUP62, PAK3, PDCD4, PLA2R1, PML, PRKCD, PTEN, RELA, ROMO1, SNCA, SPEF2, SREBF1, SRF, SRR, TERT, TIMP1, TSPO, TWIST1, ULK3]
GO:0007569	cell aging	21	23.0769	0.0154864	[AMH, CDK6, CDKN2A, HMGA1, HMGA2, MARCH5, MIF, MMAB, NOX4, NUP62, PAK3, PDCD4, PLA2R1, PML, PRKCD, PTEN, ROMO1, SRF, TERT, TWIST1, ULK3]
GO:0007596	blood coagulation	95	17.0863	0.0307896	[A2M, ACTB, ACTN1, ACTN2, ACTN4, AK4, AKAP1, ALDOA, ANXA5, APOE, ARRB2, ATP1B1, ATP1B3, ATP2B4, BCAR1, BSG, C1QBP, CAPZA2, CBX5, CLU, DAGLA, DEAF1, DGKQ, DGKZ, EDN1, EFEMP2, EHD1, EHD2, ENPP4, F11R, F2R, F2RL1, F8, FLNA, GLG1, GNA11, GNA13, GNAI2, GNG2, GP1BB, GRB14, GUCY1B3, HMG20B, HPS6, ITGA5, ITGB3, ITPK1, ITPR3, KCNMB1, KIF3A, KIF9, KIFAP3, LMAN1, LRP8, LRRC16A, MAFF, MAFG, MAPK3, MMRN1, NAN…
GO:0007599	hemostasis	97	17.2598	0.0230523	[A2M, ACTB, ACTN1, ACTN2, ACTN4, AK4, AKAP1, ALDOA, ANXA5, APOE, ARRB2, ATP1B1, ATP1B3, ATP2B4, BCAR1, BSG, C1QBP, CAPZA2, CBX5, CLU, DAGLA, DEAF1, DGKQ, DGKZ, EDN1, EFEMP2, EHD1, EHD2, ENPP4, F11R, F2R, F2RL1, F8, FLNA, GLG1, GNA11, GNA13, GNAI2, GNG2, GP1BB, GPI, GRB14, GUCY1B3, HMG20B, HPS6, ITGA5, ITGB3, ITPK1, ITPR3, KCNMB1, KIF3A, KIF9, KIFAP3, LMAN1, LRP8, LRRC16A, MAFF, MAFG, MAPK3, MMRN1…
GO:0007638	mechanosensory behavior	4	40	0.0420875	[ETV1, NRXN2, SHANK3, STRA6]
GO:0008063	Toll signaling pathway	3	50	0.0411606	[MYD88, PELI2, PELI3]
GO:0008064	regulation of actin polymerization or depolymerization	28	20.5882	0.0263994	[ADD2, ARF1, ARPC1B, ARPC5, CAPZA2, CORO1A, CORO1B, F2RL1, FHOD3, JMY, KANK1, LATS1, LRRC16A, MLST8, MYADM, NCK2, PAK3, PDXP, PFN1, PICK1, PLEKHH2, PRKCD, SHROOM2, SPTBN2, TRIOBP, TWF2, VASP, WASH6P]
GO:0008104	protein localization	304	16.2654	0.00446484	[ABCA1, ACD, ACTN2, ACTN4, AGAP3, AGRN, AKAP12, AKAP3, AKAP5, AKAP6, AMH, AMOT, ANK3, AP1B1, AP1G1, AP2A1, AP2S1, AP3D1, AP5Z1, APBA2, APBA3, APC, ARF1, ARFGAP1, ARHGAP33, ARHGDIA, ARHGEF16, ARL2, ARMCX3, ARRB2, ASPH, ASPSCR1, ASTN2, ATCAY, ATG4D, ATP6V0C, ATP6V0D1, ATP6V0E2, ATP6V1A, AURKAIP1, AXIN1, BAD, BAMBI, BANP, BAX, BCL3, BID, BIN3, BSG, BTN3A1, C1QTNF3, C5orf30, CAPN3, CARD8, CASC5, CDC3…
GO:0008154	actin polymerization or depolymerization	31	19.2547	0.0467332	[ADD2, ARF1, ARHGAP6, ARPC1B, ARPC5, CAPZA2, CORO1A, CORO1B, F2RL1, FHOD3, JMY, KANK1, LATS1, LRRC16A, MICAL1, MICALL2, MLST8, MYADM, NCK2, PAK3, PDXP, PFN1, PICK1, PLEKHH2, PRKCD, SHROOM2, SPTBN2, TRIOBP, TWF2, VASP, WASH6P]
GO:0008215	spermine metabolic process	4	57.1429	0.00998895	[RAI1, SAT2, SMOX, SMS]
GO:0008219	cell death	343	17.193	4.07626164655097E-5	[AATF, ACD, ACKR3, ACTN1, ACTN2, ACTN4, ADAMTSL4, ADM, AES, AGRN, AIMP2, ALDOC, ALK, ALKBH7, AMH, ANXA5, AP5Z1, APAF1, APC, APOE, ARHGAP4, ARHGDIA, ARHGEF16, ARHGEF17, ARHGEF18, ARRB2, ATAD3A, ATCAY, ATF5, ATG4D, ATN1, ATP13A2, ATP7A, AXIN1, BAD, BAG3, BAX, BCAR1, BCL2L12, BCL2L13, BCL2L14, BCL3, BCL7C, BEX1, BEX2, BID, BLOC1S2, BMP5, BOK, BRMS1, BSCL2, BTG1, C1QBP, C6orf120, CACYBP, CAPN10, CAPN…
GO:0008285	negative regulation of cell proliferation	106	17.377	0.0151777	[ADM, AIMP2, APC, APOE, ASPH, BAI1, BAX, BMP5, BTG1, CD164, CD276, CDK6, CDKN1C, CDKN2A, CDKN2C, CHERP, CIB1, CLMN, COL18A1, COMT, CTBP1, DDR1, DEAF1, DICER1, DLC1, DLG5, E2F7, EMD, F2R, FABP3, FBXW7, FLCN, GAL, GPR56, GSTP1, HGS, HMGA1, HSF1, IFITM1, IGFBP5, ING1, KANK2, KAT2B, KIFAP3, KLF11, LDOC1, LEPREL2, LRP6, MAGI2, MDM4, MED25, MEN1, NCK2, NDFIP1, NELL1, NF2, NFKBIL1, NOS3, NOTCH2, NOX4, N…
GO:0008361	regulation of cell size	29	29.5918	6.511786675479606E-5	[AMOT, APOE, ARHGAP4, ATP2B4, CDKL5, CXXC1, DCC, E2F4, EDN1, LIMK1, MAP1B, MEGF8, NDEL1, NELL1, NTN1, PTEN, RARG, RPTOR, RYK, SEMA3A, SEMA3F, SEMA7A, SLIT1, SLIT3, TNFRSF12A, TWF2, ULK1, WNT3, WNT5A]
GO:0008543	fibroblast growth factor receptor signaling pathway	38	19.7917	0.0204233	[ADCY1, ADCY2, ADCY6, ADRBK1, AGO1, AGO2, BAD, DUSP6, FGF12, FGF14, FGFR4, FIBP, FRS3, IRS1, ITPR3, KIT, KITLG, MAP2K2, MAPK3, MDM2, MLST8, NR4A1, PAK3, PDE1A, PDGFB, PIK3R2, PPP2R1A, PRKAR1A, PRKAR1B, PRKCA, PRKCD, PTEN, RAB14, SPRY1, SULF1, THEM4, TNRC6B, WNT5A]
GO:0008610	lipid biosynthetic process	110	17.7994	0.00673628	[ACOT7, ACOX2, ACSL1, ACSL4, ACSS1, ADM, AGPAT2, AMH, APOC1, APOE, ARF1, BMP5, C9orf3, CBR1, CBR4, CDS2, CERS6, COLGALT1, COQ2, CSNK1G2, CYB5R3, CYP27A1, DHCR7, DOLPP1, DPM2, DPM3, EDN1, ETNK2, FABP3, FABP5, FAM213B, FAM58A, FASN, FAXDC2, FBXW7, FGFR4, FITM2, G6PD, GBGT1, GGT7, GPAA1, GPCPD1, GPD1L, HSD11B2, HSD17B12, INPP5E, INSIG2, LBR, LPGAT1, LPL, MBOAT1, MBOAT7, MID1IP1, MIF, MVD, MVK, MYO5A…
GO:0008654	phospholipid biosynthetic process	45	19.3133	0.0189237	[AGPAT2, ARF1, CDS2, DOLPP1, DPM2, DPM3, ETNK2, FABP3, FABP5, GPAA1, GPCPD1, GPD1L, INPP5E, LPGAT1, MBOAT1, MBOAT7, MVD, MVK, OCRL, PCYT1B, PCYT2, PDGFB, PEMT, PGAP1, PIGQ, PIGT, PIK3R2, PIK3R3, PIP5K1C, PLA2G12A, PLA2G3, PLA2G4A, PLA2G6, PLB1, PLD3, PNPLA2, PTDSS2, PTEN, SERINC1, SERINC5, SH2D3C, SPHK2, SPTLC2, SRD5A3, VAC14]
GO:0009059	macromolecule biosynthetic process	706	15.0694	0.0263417	[AATF, ABCA1, ABCA2, ABCC5, ABHD14B, ABLIM1, ABLIM2, ACD, ACVR2A, ADRM1, AEBP1, AES, AGO1, AGO2, AGRN, AIMP2, AKAP17A, ALG10, ALG12, ALG3, ALK, AMH, ANP32A, AP2A1, APOE, ARHGEF10L, ARID3A, ARID5A, ARMCX3, ARRB2, ARX, ASCC2, ASCC3, ASPH, ATF5, ATN1, ATOH8, ATP7A, ATRX, AURKAIP1, AXIN1, B3GALT5, B3GALT6, B3GAT3, B4GALT2, BAHD1, BAMBI, BANP, BAZ2B, BCL2L12, BCL3, BCL9L, BEX1, BEX2, BLOC1S2, BMP5, BR…
GO:0009100	glycoprotein metabolic process	70	17.3267	0.0441829	[AATF, AGRN, ALG10, ALG12, ALG3, ATP7A, B3GALT5, B3GALT6, B3GAT3, B4GALT2, CANT1, CHPF, CHST12, CHST14, CHST15, CHST3, CHST7, CHST9, CHSY3, COL11A1, CSGALNACT1, CST3, DERL3, DOLPP1, DPM2, DPM3, DSEL, FKRP, FUT5, GAL3ST3, GALNT16, GBGT1, GCNT2, GNPTG, HS3ST5, HSPG2, JAK3, KAT2B, LMAN1, MAN1C1, MAN2A1, MGAT2, MGAT3, MGAT4A, MGAT4B, MUC12, MUC20, MVD, NCAN, NECAB3, OGT, PARP10, PCSK6, PMM2, POFUT1, …
GO:0009101	glycoprotein biosynthetic process	62	17.6638	0.0399401	[AATF, ALG10, ALG12, ALG3, ATP7A, B3GALT5, B3GALT6, B3GAT3, B4GALT2, CANT1, CHPF, CHST12, CHST14, CHST15, CHST3, CHST7, CHST9, CHSY3, CSGALNACT1, DERL3, DOLPP1, DPM2, DPM3, DSEL, FKRP, FUT5, GAL3ST3, GALNT16, GBGT1, GCNT2, GNPTG, HS3ST5, JAK3, KAT2B, LMAN1, MAN1C1, MAN2A1, MGAT2, MGAT3, MGAT4A, MGAT4B, MUC12, MUC20, MVD, NCAN, NECAB3, OGT, PARP10, PMM2, POFUT1, SIRT4, SIRT6, SLC35D1, SRD5A3, ST3G…
GO:0009108	coenzyme biosynthetic process	25	21.5517	0.0205306	[ACOT7, ACSL1, ACSL4, ACSS1, ATIC, COASY, COQ2, COQ3, DCAKD, FAM3A, FASN, FLAD1, HSD17B12, NADK2, NAPRT1, NMNAT1, PANK2, PCBD1, PDK3, PNP, PPCS, QPRT, SLC25A1, SNCA, SPR]
GO:0009116	nucleoside metabolic process	147	16.8772	0.0134592	[ABCA2, ACAP3, ACOT7, ADK, AGAP3, AGRN, AHSA1, AK4, AK5, ALDOA, AMOT, APRT, ARF1, ARFGAP1, ARHGAP24, ARHGAP6, ARHGEF1, ARHGEF10L, ARHGEF16, ARHGEF17, ARHGEF18, ARHGEF19, ARL2, ARL8A, ARRB2, ATIC, ATP5D, ATP6V1A, AXIN1, BAD, BVES, CDKL5, CHD8, CHN1, CHN2, COASY, CPEB2, DCAKD, DDX17, DDX39B, DDX54, DENND3, DENND4A, DENND4B, DENND5B, DHODH, DLC1, DNAJB6, DNM2, DNM3, DNPH1, ENPP4, EPHA2, EPHB3, FGD3,…
GO:0009117	nucleotide metabolic process	200	17.0794	0.00254125	[ABCA1, ABCA2, ACAP3, ACOT7, ADCY1, ADCY2, ADCY6, ADK, ADM, AGAP3, AGRN, AHSA1, AK4, AK5, AKAP12, AKAP5, AKAP6, ALDOA, AMOT, APOE, APRT, ARF1, ARFGAP1, ARHGAP24, ARHGAP6, ARHGEF1, ARHGEF10L, ARHGEF16, ARHGEF17, ARHGEF18, ARHGEF19, ARL2, ARL8A, ARRB2, ATIC, ATP2B4, ATP5D, ATP6V1A, AXIN1, BAD, BVES, CACNB4, CBS, CDKL5, CHD8, CHN1, CHN2, COASY, CPEB2, CSGALNACT1, DCAKD, DDX17, DDX39B, DDX54, DENND3,…
GO:0009118	regulation of nucleoside metabolic process	73	18.1592	0.0155247	[ACAP3, AGAP3, AGRN, AHSA1, AMOT, ARFGAP1, ARHGAP24, ARHGAP6, ARHGEF1, ARHGEF10L, ARHGEF16, ARHGEF17, ARHGEF18, ARHGEF19, ARL2, ARRB2, AXIN1, BVES, CDKL5, CHN1, CHN2, CPEB2, DENND3, DENND4A, DENND4B, DENND5B, DLC1, DNAJB6, EPHA2, EPHB3, FGD3, FLCN, GIT1, GNAO1, KALRN, LLGL1, LRRK2, MLST8, NDEL1, NTRK2, OCRL, PFN1, PGAM5, PIN1, PTGES2, RAB3GAP1, RALGAPA1, RALGAPA2, RAPGEF1, RAPGEF2, RGS10, RGS14, …
GO:0009119	ribonucleoside metabolic process	138	16.8911	0.015867	[ABCA2, ACAP3, ACOT7, ADK, AGAP3, AGRN, AK4, AK5, ALDOA, AMOT, APRT, ARF1, ARFGAP1, ARHGAP24, ARHGAP6, ARHGEF1, ARHGEF10L, ARHGEF16, ARHGEF17, ARHGEF18, ARHGEF19, ARL2, ARL8A, ARRB2, ATP5D, ATP6V1A, AXIN1, BAD, BVES, CDKL5, CHD8, CHN1, CHN2, COASY, CPEB2, DCAKD, DDX17, DDX39B, DDX54, DENND3, DENND4A, DENND4B, DENND5B, DHODH, DLC1, DNM2, DNM3, ENPP4, EPHA2, EPHB3, FGD3, FLCN, GIT1, GNAO1, GNG11, G…
GO:0009135	purine nucleoside diphosphate metabolic process	4	40	0.0420875	[AK5, BAD, GUK1, NUDT16]
GO:0009141	nucleoside triphosphate metabolic process	129	17.4089	0.00754255	[ABCA2, ACAP3, ADK, AGAP3, AGRN, AK4, AK5, ALDOA, AMOT, ARF1, ARFGAP1, ARHGAP24, ARHGAP6, ARHGEF1, ARHGEF10L, ARHGEF16, ARHGEF17, ARHGEF18, ARHGEF19, ARL2, ARL8A, ARRB2, ATP5D, ATP6V1A, AXIN1, BAD, BVES, CDKL5, CHD8, CHN1, CHN2, CPEB2, DCTPP1, DDX17, DDX39B, DDX54, DENND3, DENND4A, DENND4B, DENND5B, DLC1, DNM2, DNM3, ENPP3, EPHA2, EPHB3, FGD3, FLCN, GIT1, GNAO1, GNG11, GNG5, GNL3, GUK1, ITPA, KAL…
GO:0009143	nucleoside triphosphate catabolic process	115	17.3454	0.0124577	[ABCA2, ACAP3, AGAP3, AGRN, AMOT, ARF1, ARFGAP1, ARHGAP24, ARHGAP6, ARHGEF1, ARHGEF10L, ARHGEF16, ARHGEF17, ARHGEF18, ARHGEF19, ARL2, ARL8A, ARRB2, ATP5D, AXIN1, BVES, CDKL5, CHD8, CHN1, CHN2, CPEB2, DCTPP1, DDX17, DDX39B, DDX54, DENND3, DENND4A, DENND4B, DENND5B, DLC1, DNM2, DNM3, ENPP3, EPHA2, EPHB3, FGD3, GIT1, GNAO1, GNG11, GNG5, GNL3, ITPA, KALRN, KATNB1, LLGL1, LRRK2, MLST8, MNAT1, MTG1, MY…
GO:0009144	purine nucleoside triphosphate metabolic process	125	17.3853	0.00881561	[ABCA2, ACAP3, ADK, AGAP3, AGRN, AK4, AK5, ALDOA, AMOT, ARF1, ARFGAP1, ARHGAP24, ARHGAP6, ARHGEF1, ARHGEF10L, ARHGEF16, ARHGEF17, ARHGEF18, ARHGEF19, ARL2, ARL8A, ARRB2, ATP5D, ATP6V1A, AXIN1, BAD, BVES, CDKL5, CHD8, CHN1, CHN2, CPEB2, DDX17, DDX39B, DDX54, DENND3, DENND4A, DENND4B, DENND5B, DLC1, DNM2, DNM3, EPHA2, EPHB3, FGD3, FLCN, GIT1, GNAO1, GNG11, GNG5, GNL3, GUK1, ITPA, KALRN, KATNB1, LLG…
GO:0009146	purine nucleoside triphosphate catabolic process	113	17.1212	0.0189071	[ABCA2, ACAP3, AGAP3, AGRN, AMOT, ARF1, ARFGAP1, ARHGAP24, ARHGAP6, ARHGEF1, ARHGEF10L, ARHGEF16, ARHGEF17, ARHGEF18, ARHGEF19, ARL2, ARL8A, ARRB2, ATP5D, AXIN1, BVES, CDKL5, CHD8, CHN1, CHN2, CPEB2, DDX17, DDX39B, DDX54, DENND3, DENND4A, DENND4B, DENND5B, DLC1, DNM2, DNM3, EPHA2, EPHB3, FGD3, GIT1, GNAO1, GNG11, GNG5, GNL3, ITPA, KALRN, KATNB1, LLGL1, LRRK2, MLST8, MNAT1, MTG1, MYH10, MYH3, MYH7…
GO:0009150	purine ribonucleotide metabolic process	162	17.161	0.00525316	[ABCA1, ABCA2, ACAP3, ACOT7, ADCY2, ADCY6, ADK, ADM, AGAP3, AGRN, AK4, AK5, AKAP12, AKAP5, AKAP6, ALDOA, AMOT, APOE, APRT, ARF1, ARFGAP1, ARHGAP24, ARHGAP6, ARHGEF1, ARHGEF10L, ARHGEF16, ARHGEF17, ARHGEF18, ARHGEF19, ARL2, ARL8A, ARRB2, ATIC, ATP2B4, ATP5D, ATP6V1A, AXIN1, BAD, BVES, CACNB4, CBS, CDKL5, CHD8, CHN1, CHN2, COASY, CPEB2, DCAKD, DDX17, DDX39B, DDX54, DENND3, DENND4A, DENND4B, DENND5B…
GO:0009151	purine deoxyribonucleotide metabolic process	6	37.5	0.0184017	[ADK, AK5, GUK1, MPG, MUTYH, NUDT16]
GO:0009153	purine deoxyribonucleotide biosynthetic process	3	100	0.00287788	[ADK, AK5, GUK1]
GO:0009154	purine ribonucleotide catabolic process	119	17.3723	0.0106591	[ABCA2, ACAP3, AGAP3, AGRN, AMOT, ARF1, ARFGAP1, ARHGAP24, ARHGAP6, ARHGEF1, ARHGEF10L, ARHGEF16, ARHGEF17, ARHGEF18, ARHGEF19, ARL2, ARL8A, ARRB2, ATP5D, AXIN1, BVES, CDKL5, CHD8, CHN1, CHN2, CPEB2, DDX17, DDX39B, DDX54, DENND3, DENND4A, DENND4B, DENND5B, DLC1, DNM2, DNM3, EPHA2, EPHB3, FGD3, GIT1, GNAO1, GNG11, GNG5, GNL3, ITPA, KALRN, KATNB1, LLGL1, LRRK2, MAPK7, MLST8, MNAT1, MTG1, MYH10, MYH…
GO:0009164	nucleoside catabolic process	116	16.763	0.0309381	[ABCA2, ACAP3, AGAP3, AGRN, AMOT, ARF1, ARFGAP1, ARHGAP24, ARHGAP6, ARHGEF1, ARHGEF10L, ARHGEF16, ARHGEF17, ARHGEF18, ARHGEF19, ARL2, ARL8A, ARRB2, ATP5D, AXIN1, BVES, CDKL5, CHD8, CHN1, CHN2, CPEB2, DDX17, DDX39B, DDX54, DENND3, DENND4A, DENND4B, DENND5B, DLC1, DNM2, DNM3, ENPP4, EPHA2, EPHB3, FGD3, GIT1, GNAO1, GNG11, GNG5, GNL3, KALRN, KATNB1, LLGL1, LRRK2, MLST8, MNAT1, MTG1, MYH10, MYH3, MYH…
GO:0009166	nucleotide catabolic process	131	17.3971	0.00729164	[ABCA2, ACAP3, AGAP3, AGRN, AHSA1, AMOT, ARF1, ARFGAP1, ARHGAP24, ARHGAP6, ARHGEF1, ARHGEF10L, ARHGEF16, ARHGEF17, ARHGEF18, ARHGEF19, ARL2, ARL8A, ARRB2, ATP5D, AXIN1, BVES, CDKL5, CHD8, CHN1, CHN2, CPEB2, DDX17, DDX39B, DDX54, DENND3, DENND4A, DENND4B, DENND5B, DLC1, DNAJB6, DNM2, DNM3, EPHA2, EPHB3, FGD3, GIT1, GNAO1, GNG11, GNG5, GNL3, GPX1, ITPA, KALRN, KATNB1, LLGL1, LRRK2, MAPK7, MLST8, MN…
GO:0009179	purine ribonucleoside diphosphate metabolic process	4	40	0.0420875	[AK5, BAD, GUK1, NUDT16]
GO:0009199	ribonucleoside triphosphate metabolic process	125	17.337	0.00962148	[ABCA2, ACAP3, AGAP3, AGRN, AK4, AK5, ALDOA, AMOT, ARF1, ARFGAP1, ARHGAP24, ARHGAP6, ARHGEF1, ARHGEF10L, ARHGEF16, ARHGEF17, ARHGEF18, ARHGEF19, ARL2, ARL8A, ARRB2, ATP5D, ATP6V1A, AXIN1, BAD, BVES, CDKL5, CHD8, CHN1, CHN2, CPEB2, DDX17, DDX39B, DDX54, DENND3, DENND4A, DENND4B, DENND5B, DLC1, DNM2, DNM3, EPHA2, EPHB3, FGD3, FLCN, GIT1, GNAO1, GNG11, GNG5, GNL3, GUK1, ITPA, KALRN, KATNB1, LLGL1, L…
GO:0009203	ribonucleoside triphosphate catabolic process	112	17.0472	0.0217545	[ABCA2, ACAP3, AGAP3, AGRN, AMOT, ARF1, ARFGAP1, ARHGAP24, ARHGAP6, ARHGEF1, ARHGEF10L, ARHGEF16, ARHGEF17, ARHGEF18, ARHGEF19, ARL2, ARL8A, ARRB2, ATP5D, AXIN1, BVES, CDKL5, CHD8, CHN1, CHN2, CPEB2, DDX17, DDX39B, DDX54, DENND3, DENND4A, DENND4B, DENND5B, DLC1, DNM2, DNM3, EPHA2, EPHB3, FGD3, GIT1, GNAO1, GNG11, GNG5, GNL3, ITPA, KALRN, KATNB1, LLGL1, LRRK2, MLST8, MNAT1, MTG1, MYH10, MYH3, MYH7…
GO:0009205	purine ribonucleoside triphosphate metabolic process	123	17.251	0.0118277	[ABCA2, ACAP3, AGAP3, AGRN, AK4, AK5, ALDOA, AMOT, ARF1, ARFGAP1, ARHGAP24, ARHGAP6, ARHGEF1, ARHGEF10L, ARHGEF16, ARHGEF17, ARHGEF18, ARHGEF19, ARL2, ARL8A, ARRB2, ATP5D, ATP6V1A, AXIN1, BAD, BVES, CDKL5, CHD8, CHN1, CHN2, CPEB2, DDX17, DDX39B, DDX54, DENND3, DENND4A, DENND4B, DENND5B, DLC1, DNM2, DNM3, EPHA2, EPHB3, FGD3, FLCN, GIT1, GNAO1, GNG11, GNG5, GNL3, GUK1, ITPA, KALRN, KATNB1, LLGL1, L…
GO:0009207	purine ribonucleoside triphosphate catabolic process	112	17.0472	0.0217545	[ABCA2, ACAP3, AGAP3, AGRN, AMOT, ARF1, ARFGAP1, ARHGAP24, ARHGAP6, ARHGEF1, ARHGEF10L, ARHGEF16, ARHGEF17, ARHGEF18, ARHGEF19, ARL2, ARL8A, ARRB2, ATP5D, AXIN1, BVES, CDKL5, CHD8, CHN1, CHN2, CPEB2, DDX17, DDX39B, DDX54, DENND3, DENND4A, DENND4B, DENND5B, DLC1, DNM2, DNM3, EPHA2, EPHB3, FGD3, GIT1, GNAO1, GNG11, GNG5, GNL3, ITPA, KALRN, KATNB1, LLGL1, LRRK2, MLST8, MNAT1, MTG1, MYH10, MYH3, MYH7…
GO:0009259	ribonucleotide metabolic process	166	17.2557	0.00381464	[ABCA1, ABCA2, ACAP3, ACOT7, ADCY2, ADCY6, ADK, ADM, AGAP3, AGRN, AK4, AK5, AKAP12, AKAP5, AKAP6, ALDOA, AMOT, APOE, APRT, ARF1, ARFGAP1, ARHGAP24, ARHGAP6, ARHGEF1, ARHGEF10L, ARHGEF16, ARHGEF17, ARHGEF18, ARHGEF19, ARL2, ARL8A, ARRB2, ATIC, ATP2B4, ATP5D, ATP6V1A, AXIN1, BAD, BVES, CACNB4, CBS, CDKL5, CHD8, CHN1, CHN2, COASY, CPEB2, DCAKD, DDX17, DDX39B, DDX54, DENND3, DENND4A, DENND4B, DENND5B…
GO:0009261	ribonucleotide catabolic process	119	17.3469	0.0111367	[ABCA2, ACAP3, AGAP3, AGRN, AMOT, ARF1, ARFGAP1, ARHGAP24, ARHGAP6, ARHGEF1, ARHGEF10L, ARHGEF16, ARHGEF17, ARHGEF18, ARHGEF19, ARL2, ARL8A, ARRB2, ATP5D, AXIN1, BVES, CDKL5, CHD8, CHN1, CHN2, CPEB2, DDX17, DDX39B, DDX54, DENND3, DENND4A, DENND4B, DENND5B, DLC1, DNM2, DNM3, EPHA2, EPHB3, FGD3, GIT1, GNAO1, GNG11, GNG5, GNL3, ITPA, KALRN, KATNB1, LLGL1, LRRK2, MAPK7, MLST8, MNAT1, MTG1, MYH10, MYH…
GO:0009264	deoxyribonucleotide catabolic process	6	35.2941	0.0250884	[MPG, MUTYH, NT5C, NTHL1, NUDT16, TDG]
GO:0009394	2'-deoxyribonucleotide metabolic process	9	29.0323	0.0249452	[ADK, AK5, GUK1, MPG, MUTYH, NT5C, NTHL1, NUDT16, TDG]
GO:0009612	response to mechanical stimulus	35	19.6629	0.0276025	[ASIC3, ATP2B4, BAD, BAG3, CNN2, COL11A1, CRADD, CYBA, DENND5B, DNAH1, ETV1, FASN, FOSL2, GLI2, GPR98, IGFBP2, JUNB, JUND, JUP, KCNJ2, KIT, MAP3K14, MAPK3, MYD88, NFKB1, NRXN2, NTRK2, PIEZO1, PKD1, RELA, SHANK3, SMPD2, SOX2, SOX9, STRA6]
GO:0009653	anatomical structure morphogenesis	393	16.7305	1.2109013647610695E-4	[ABLIM1, ABLIM2, ACD, ACKR3, ACTB, ACTG1, ACVR2A, ADAM12, ADCY1, ADM, AES, AGRN, AKIP1, ALDOA, AMH, AMOT, ANK3, ANKRD6, AP2A1, AP2S1, APAF1, APC, APOE, ARHGAP24, ARHGAP39, ARHGAP4, ARHGDIA, ARHGEF1, ARHGEF18, ARX, ASPH, ATP2B4, ATP6V0D1, ATP7A, AXIN1, B9D2, BAI1, BAMBI, BAX, BCL9L, BIN3, BMP5, BRSK1, BSG, BTG1, BVES, C1QBP, C21orf2, C5orf30, CACNB2, CACNB4, CAPN3, CARM1, CASC5, CBS, CD248, CDC42E…
GO:0009790	embryo development	173	16.4919	0.0180668	[AATF, ACD, ACSL4, ACVR2A, ADM, AMOT, APAF1, APBA2, APBA3, ATP2B4, ATP7A, AXIN1, BAX, CHD8, CNOT3, COL11A1, CRABP2, DDX5, DEAF1, DICER1, DLC1, DLK1, DNAJB6, DUSP5, DUSP6, DVL1, DVL3, E2F7, E2F8, E4F1, ECE1, ECSIT, EDN1, EPHA2, EPHB2, EPN1, ERF, ETNK2, EYA1, EYA4, FAM3A, FBN2, FKBP8, FLCN, FLT3LG, FLVCR1, FOXB1, FOXK2, FOXP4, FUZ, FZD3, FZD4, FZD9, GATAD2A, GJA5, GLI2, GNA13, GRN, HMGA2, HSF1, HSP…
GO:0009892	negative regulation of metabolic process	286	16.3429	0.00449613	[A2M, AATF, ACD, AES, AGO1, AGO2, AKAP6, AMH, ANAPC11, AP2A1, APC, APOC1, APOE, APOM, ARID5A, ARRB2, ATCAY, ATN1, ATP2B4, AXIN1, BAHD1, BANP, BAX, BCL2L12, BCL3, BMP5, BRMS1, BSCL2, C14orf169, C1QBP, C1QTNF3, CACTIN, CAPN3, CBX4, CBX5, CBX6, CD276, CDK9, CDKN1C, CDKN2A, CDKN2C, CHD8, CIB1, CLN3, CNKSR3, CNOT3, CNOT6, CNR1, COMT, CPEB2, CRTAP, CST3, CTBP1, CYP2D6, DAPK3, DDX5, DEDD, DHX34, DICER1,…
GO:0009893	positive regulation of metabolic process	368	15.3975	0.0414041	[AATF, ABCA1, ABHD14B, ABLIM1, ABLIM2, ACD, ACKR3, ACSL1, ACVR2A, ADCY1, ADCY2, ADCY6, ADM, AGO2, AGRN, AGTR1, AIMP2, AKAP12, AKAP5, ALK, AMH, ANAPC11, ANK3, ANKRD6, APC, APLN, APOC1, APOE, ARFGAP1, ARHGEF10L, ARID3A, ARID5A, ARMCX3, ARRB2, ASPH, ATP6V0D1, AURKAIP1, AXIN1, BAD, BAMBI, BAX, BCL2L12, BCL3, BCL9L, BEX1, BEX2, BLOC1S2, BMP5, BRF1, BRMS1, BVES, C1QBP, C6orf1, CACYBP, CAPN3, CARD10, CA…
GO:0009894	regulation of catabolic process	148	19.973	7.143150721877468E-6	[ACAP3, AGAP3, AGO2, AGRN, AHSA1, AMOT, APC, APOC1, APOE, ARFGAP1, ARHGAP24, ARHGAP6, ARHGEF1, ARHGEF10L, ARHGEF16, ARHGEF17, ARHGEF18, ARHGEF19, ARL2, ARRB2, AXIN1, BAD, BANP, BAX, BSCL2, BVES, CDKL5, CDKN2A, CHN1, CHN2, CLN3, CLU, CNR1, CPEB2, CST3, DAPK3, DEDD, DENND3, DENND4A, DENND4B, DENND5B, DHX34, DISC1, DLC1, DNAJB6, DVL1, ECD, EGLN2, EPHA2, EPHB3, FBXO43, FBXW7, FGD3, FLNA, FURIN, GGA1,…
GO:0009895	negative regulation of catabolic process	25	21.9298	0.0166959	[APOC1, BANP, BSCL2, CLN3, CNR1, CPEB2, CST3, DEDD, DHX34, DLC1, FBXO43, FLNA, FURIN, GIPC1, IER3, MAPK7, MDM4, NELL1, PRELID1, PSMF1, RELA, SENP1, TIMP1, TIMP3, WDR6]
GO:0009896	positive regulation of catabolic process	38	21.7143	0.00455715	[AGO2, APC, APOE, AXIN1, BAD, BAX, CLU, DVL1, EGLN2, FURIN, GGA1, HSPBP1, IER3, INSR, IRS1, LRRK2, MAPK15, MDM2, MYLIP, NDFIP1, NEDD4L, PLK2, PNPLA2, PRKCD, PTEN, SGSM3, SOX9, STUB1, TFEB, TNFAIP3, TNRC6B, TP53INP1, TWIST1, ULK1, WNT5A, ZC3H12A, ZFP36, ZNF268]
GO:0009950	dorsal/ventral axis specification	7	36.8421	0.0122982	[AXIN1, LRP5L, LRP6, MDFI, SFRP1, VAX2, WNT3]
GO:0009966	regulation of signal transduction	416	18.0791	1.4832600043916269E-8	[A2M, ABCA1, ABHD6, ACAP3, ACKR3, ACVR2A, ADM, ADRBK1, ADRBK2, AES, AGAP3, AGPAT2, AGRN, AKAP12, AKAP5, AKAP6, ALK, AMH, AMOT, ANKRD6, AP2A1, AP2S1, APAF1, APC, APOE, ARFGAP1, ARHGAP19, ARHGAP23, ARHGAP24, ARHGAP33, ARHGAP39, ARHGAP4, ARHGAP44, ARHGAP6, ARHGDIA, ARHGEF1, ARHGEF10L, ARHGEF16, ARHGEF17, ARHGEF18, ARHGEF19, ARRB2, ASPH, AURKAIP1, AXIN1, BAD, BAMBI, BAX, BCL2L14, BCL3, BCL9L, BID, BM…
GO:0009967	positive regulation of signal transduction	193	18.1391	1.4233175816247574E-4	[ACKR3, ACVR2A, AGPAT2, AKAP12, AKAP5, AKAP6, ALK, AMH, ANKRD6, APAF1, ARHGAP4, ARHGAP6, ARRB2, AXIN1, BAD, BAMBI, BAX, BCL2L14, BID, BMP5, C1QBP, CANT1, CC2D1A, CDKN1C, CDKN2A, CFLAR, CHN1, CHN2, CIB1, CLU, CRADD, CSF1, CTH, CTSC, CTSH, DAPK3, DCC, DDX17, DDX5, DDX60, DISC1, DVL1, DVL3, EDN1, EIF2S1, EMP2, EYA1, F2R, F2RL1, FASN, FBXW7, FGFR4, FKBP8, FLCN, FLNA, FZD4, GCNT2, GIPC1, GLIPR2, GNAI2…
GO:0009968	negative regulation of signal transduction	169	18.9675	3.5158767237399255E-5	[ACKR3, ADM, ADRBK1, ADRBK2, AES, AMH, ANKRD6, AP2A1, AP2S1, APC, APOE, ARHGAP24, ARHGEF1, ARRB2, AXIN1, BAMBI, BAX, BCL9L, BMP5, C1QBP, CACTIN, CARD8, CD109, CFLAR, CHD8, CIB1, CISH, CLTA, CLU, CNKSR3, CTH, DAB1, DGKZ, DLC1, DLK1, DUSP16, DUSP26, DUSP5, DUSP6, DUSP7, DUSP8, EGFL7, EPHA2, EPN1, EYA1, F2RL1, FBN1, FBN2, FBXW7, FLCN, GLG1, GLIS2, GPD1L, GPI, GPS1, GPX1, GRK6, GSTP1, HGS, HIC1, HIF1…
GO:0010033	response to organic substance	386	16.2321	0.00150902	[AATF, ABCA1, ABCA2, ACD, ACKR3, ACSBG1, ACSL1, ACSL4, ADAMTS7, ADCY1, ADCY2, ADCY6, ADM, ADRBK1, AES, AGO1, AGO2, AGPAT2, AKAP6, AKR1C1, ALDOC, AMH, ANXA5, AP2A1, AP2S1, APOE, APOM, APRT, ARFGAP1, ARHGAP4, ARHGDIA, ARHGEF1, ARHGEF16, ARHGEF17, ARHGEF18, ARRB2, ARSA, ASPH, ATP6V0C, ATP6V0D1, ATP6V0E2, ATP6V1A, AXIN1, BAD, BAMBI, BAX, BCAR1, BCL9L, BDH1, BID, BSG, CAB39L, CACTIN, CACYBP, CALCOCO2,…
GO:0010243	response to organonitrogen compound	122	16.3978	0.0482932	[ADCY1, ADCY2, ADCY6, ADM, AKAP6, ALDOC, APOE, APRT, ASPH, ATP6V0C, ATP6V0D1, ATP6V0E2, ATP6V1A, BAD, BCAR1, BDH1, BSG, CAB39L, CACYBP, CAPN10, CARM1, CBS, CHRNB1, CISH, CNR1, COASY, CPEB2, CPS1, CYBA, DCC, DGKQ, DHODH, DHX34, DOK1, EDN1, EIF4EBP1, FABP3, FAM58A, FGFR4, FOSL2, GAL, GNAI2, GNAO1, GNG11, GNG2, GNG5, GNG7, GPX1, GSTM2, HCN1, HSD11B2, IGFBP5, INSIG2, INSR, IRS1, JAK3, JUNB, JUND, JUP…
GO:0010468	regulation of gene expression	600	15.5481	0.00391721	[A2M, AATF, ABCA2, ABHD14B, ABLIM1, ABLIM2, ACVR2A, ADK, AES, AGO1, AGO2, AGRN, AKAP17A, AKR1C1, ALK, AMH, ANK3, ANP32A, APBA2, APBA3, APOE, ARHGEF10L, ARID3A, ARID5A, ARMCX3, ARRB2, ASCC2, ASCC3, ASPH, ATF5, ATN1, ATOH8, ATP7A, ATRX, AURKAIP1, AXIN1, BAD, BAG3, BAHD1, BAMBI, BANP, BAZ2B, BCL2L12, BCL3, BCL9L, BEX1, BEX2, BLOC1S2, BMP5, BRF1, BRMS1, BTG1, C14orf169, C1QBP, C1QTNF3, C6orf1, CACTIN…
GO:0010563	negative regulation of phosphorus metabolic process	76	21.902	6.203419269928331E-5	[AKAP6, APC, APOC1, APOE, BAX, CACTIN, CDKN1C, CDKN2A, CDKN2C, CIB1, CNKSR3, CPEB2, DUSP16, DUSP26, DUSP5, DUSP6, DUSP7, DUSP8, DVL1, EDN1, F2RL1, FAM129A, FLCN, GMFB, GNAI2, GPD1L, GPS1, GRM3, GSTP1, HEXIM1, HSPB1, HYAL2, IGBP1, KAT2B, LATS1, LRP6, MAPK7, MAPK8IP1, MEN1, MICAL1, MLLT1, MYADM, NF2, NUP62, PAK3, PDCD4, PDGFB, PIN1, PKIA, PPAP2B, PPM1F, PPP2R1A, PRKAG2, PRKAR1A, PRKAR1B, PRKCA, PRK…
GO:0010564	regulation of cell cycle process	81	17.3077	0.0332885	[AMH, ANAPC11, ANAPC15, APC, AURKAIP1, BID, CCNB3, CDC25B, CDK9, CDKN2A, CDT1, CFH, CRADD, DAPK3, DDX39B, DGKZ, E2F7, E2F8, E4F1, ECD, EDN1, FBXO43, FBXW7, FLCN, GIPC1, GPR3, HMGA2, HSF1, IER3, INSR, KANK2, KLHL21, LONP1, MAD1L1, MDC1, MDM2, MDM4, MED25, MIF, MYBBP1A, NABP2, NUBP2, NUDT16, PAK3, PDE3A, PDGFB, PDPN, PDXP, PIDD, PIN1, PKD1, PKIA, PLK2, PML, PRKAR1A, PRKCA, PSMB10, PSMF1, PTEN, RAD5…
GO:0010595	positive regulation of endothelial cell migration	16	27.1186	0.00692793	[AMOT, BCAR1, CIB1, EDN1, HDAC7, HSPB1, ITGB3, NELL1, NELL2, PDGFB, PPAP2B, PRKCA, SCARB1, VEGFC, WNT5A, ZNF580]
GO:0010605	negative regulation of macromolecule metabolic process	263	16.4478	0.00461961	[A2M, AATF, ACD, AES, AGO1, AGO2, AMH, ANAPC11, AP2A1, APC, APOE, APOM, ARID5A, ARRB2, ATN1, ATP2B4, AXIN1, BAHD1, BANP, BAX, BCL2L12, BCL3, BRMS1, C14orf169, C1QBP, C1QTNF3, CACTIN, CAPN3, CBX4, CBX5, CBX6, CD276, CDK9, CDKN1C, CDKN2A, CDKN2C, CHD8, CIB1, CLN3, CNKSR3, CNOT3, CNOT6, CPEB2, CRTAP, CST3, CTBP1, DAPK3, DDX5, DEDD, DHX34, DICER1, DNAJB6, DNAJC2, DUSP16, DUSP26, DUSP5, DUSP6, DUSP7, …
GO:0010608	posttranscriptional regulation of gene expression	75	17.5644	0.0292864	[AGO1, AGO2, ASPH, BAG3, BCL3, BRF1, C1QBP, CDKN2A, CIRBP, CLU, CNOT3, CNOT6, CPEB2, CRTAP, CTSH, DAPK3, DICER1, DPM2, DPM3, EEF2, EIF1B, EIF2S1, EIF4E3, EIF4EBP1, ENC1, FAM129A, FBXW7, FECH, FLNA, GCNT2, GIPC1, HCFC1, HEXIM1, HSPB1, IGFBP5, ISOC2, MALSU1, MDM2, MDM4, MEX3D, MIF4GD, MKNK2, MTG1, MYD88, MYLIP, NANOS1, NCK2, PAIP2B, PML, PPAP2B, PRKCD, PTEN, RBM10, RBM38, RBM4, RBM4B, RPS27L, RPS4X…
GO:0010631	epithelial cell migration	39	21.547	0.00470094	[AMOT, APOE, BCAR1, CIB1, CORO1B, CTSH, EDN1, EPHA2, GIPC1, GLIPR2, GPX1, HDAC7, HSPB1, ITGB3, KIT, LOXL2, MEN1, MYH9, NANOS1, NELL1, NELL2, NOS3, NR4A1, PDGFB, PFN1, PKN3, PPAP2B, PPM1F, PRKCA, PRKX, PTEN, SCARB1, SEMA3A, SOX9, SRF, TNFSF12, VEGFC, WNT5A, ZNF580]
GO:0010634	positive regulation of epithelial cell migration	21	25	0.00611069	[AMOT, BCAR1, CIB1, CTSH, EDN1, GLIPR2, HDAC7, HSPB1, ITGB3, NELL1, NELL2, PDGFB, PFN1, PPAP2B, PPM1F, PRKCA, SCARB1, SOX9, VEGFC, WNT5A, ZNF580]
GO:0010638	positive regulation of organelle organization	56	18.3007	0.0269254	[AMOT, APC, ARF1, ARHGEF10L, ARID5A, ARL2, ARRB2, BAD, BAX, BID, C1QBP, CORO1A, CORO1B, CTBP1, EDN1, F2RL1, FHOD1, INSR, JMY, KATNB1, KIAA1324, LIMK1, LMAN1, LRRC16A, MAPK3, MARCH5, MEN1, MLST8, NANOS1, NCK2, NF2, NOX4, OGT, PAXBP1, PDGFB, PDXP, PFN1, PICK1, PLA2G6, PML, PPM1F, PTEN, RB1, RPS6KA4, SFRP1, SIVA1, SORBS3, SREBF1, SURF4, TMED9, TMEM27, TPM1, VASP, WASH6P, WNT5A, ZNF205]
GO:0010639	negative regulation of organelle organization	48	20.0837	0.00774715	[ACD, ADD2, ANAPC11, ANAPC15, APC, ARHGAP6, AURKAIP1, CAPZA2, CIB1, CORO1A, CORO1B, CTBP1, DLC1, FBXO43, FHOD3, FLCN, GAS2L1, GPX1, IER3, KANK1, KATNB1, LRRC16A, MAD1L1, MALSU1, MID1IP1, MYADM, NOC2L, NUBP2, PFN1, PICK1, PLEKHH2, PML, PRELID1, PRKAR1A, PRKCD, RECQL4, RPS6KA2, SHANK3, SHROOM2, SNCA, SPTBN2, TEX14, TOM1L1, TRIOBP, TWF2, TWIST1, UBE2C, XRCC3]
GO:0010646	regulation of cell communication	458	17.7313	3.01731496103507E-8	[A2M, ABCA1, ABHD6, ACAP3, ACKR3, ACVR2A, ADM, ADRBK1, ADRBK2, AES, AGAP3, AGPAT2, AGRN, AKAP12, AKAP5, AKAP6, ALK, AMH, AMOT, ANK3, ANKRD6, AP2A1, AP2S1, APAF1, APC, APLN, APOE, ARF1, ARFGAP1, ARHGAP19, ARHGAP23, ARHGAP24, ARHGAP33, ARHGAP39, ARHGAP4, ARHGAP44, ARHGAP6, ARHGDIA, ARHGEF1, ARHGEF10L, ARHGEF16, ARHGEF17, ARHGEF18, ARHGEF19, ARRB2, ASPH, ATP2B4, AURKAIP1, AXIN1, BAD, BAMBI, BAX, BCL…
GO:0010647	positive regulation of cell communication	202	18.0518	1.3158326241293725E-4	[ACKR3, ACVR2A, AGPAT2, AKAP12, AKAP5, AKAP6, ALK, AMH, ANK3, ANKRD6, APAF1, ARHGAP4, ARHGAP6, ARRB2, AXIN1, BAD, BAMBI, BAX, BCL2L14, BID, BMP5, C1QBP, CANT1, CC2D1A, CDKN1C, CDKN2A, CFLAR, CHN1, CHN2, CIB1, CLU, CRADD, CSF1, CTH, CTSC, CTSH, DAPK3, DCC, DDX17, DDX5, DDX60, DISC1, DVL1, DVL3, EDN1, EIF2S1, EMP2, EYA1, F2R, F2RL1, FASN, FBXW7, FGFR4, FKBP8, FLCN, FLNA, FZD4, GCNT2, GIPC1, GJA5, G…
GO:0010648	negative regulation of cell communication	179	19.0426	1.6222251153762428E-5	[ABHD6, ACKR3, ADM, ADRBK1, ADRBK2, AES, AMH, ANKRD6, AP2A1, AP2S1, APC, APOE, ARF1, ARHGAP24, ARHGEF1, ARRB2, AXIN1, BAMBI, BAX, BCL9L, BMP5, C1QBP, CACTIN, CARD8, CD109, CFLAR, CHD8, CIB1, CISH, CLN3, CLTA, CLU, CNKSR3, CTH, DAB1, DGKZ, DLC1, DLK1, DUSP16, DUSP26, DUSP5, DUSP6, DUSP7, DUSP8, EGFL7, EPHA2, EPN1, EYA1, F2RL1, FBN1, FBN2, FBXW7, FLCN, GLG1, GLIS2, GNAI2, GPD1L, GPI, GPS1, GPX1, GR…
GO:0010720	positive regulation of cell development	49	24.2574	9.449813222966273E-5	[APOE, ARHGDIA, BAD, BAMBI, BCL9L, C1QBP, CDKL5, CIB1, DICER1, DISC1, EPHB2, FAM58A, GCNT2, GLIPR2, KIT, LIMK1, LRRC16A, MAN2A1, MAP1B, MEGF8, METRN, MYADM, NDEL1, NELL1, NTN1, NTRK2, NUMBL, OBSL1, PDE3A, RAC3, RELA, RGS14, SEMA7A, SHANK3, SMOX, SOX11, SOX2, STK11, STK25, TENM4, TGFB1I1, TNFRSF12A, TRIOBP, TSPO, TWF2, TWIST1, VEGFC, WNT3, XRCC4]
GO:0010721	negative regulation of cell development	29	20.1389	0.0316608	[ARHGAP4, ARHGDIA, ARHGEF1, ATF5, BMP5, CXXC1, DAB1, DCC, DICER1, EPHB2, HMGA2, ID4, KANK1, NELL1, NTN1, PTEN, RAPGEF2, RTN4R, RYK, SEMA3A, SEMA3F, SFRP1, SLIT1, SLIT3, SOX11, TSPO, ULK1, WNT3, WNT5A]
GO:0010737	protein kinase A signaling	6	31.5789	0.0428696	[AKAP12, AKAP5, AKAP6, AMH, AURKAIP1, MIF]
GO:0010738	regulation of protein kinase A signaling	6	42.8571	0.00887983	[AKAP12, AKAP5, AKAP6, AMH, AURKAIP1, MIF]
GO:0010739	positive regulation of protein kinase A signaling	4	50	0.0177442	[AKAP12, AKAP5, AMH, MIF]
GO:0010743	regulation of macrophage derived foam cell differentiation	9	28.125	0.0304538	[ABCA1, ABCA5, AGTR1, CSF1, ITGB3, LPL, NFKB1, NFKBIA, NR1H2]
GO:0010765	positive regulation of sodium ion transport	8	40	0.00423139	[ANK3, CNKSR3, FGF12, FGF14, GPD1L, NANOS1, NEDD4L, SCN3B]
GO:0010769	regulation of cell morphogenesis involved in differentiation	60	24.5902	1.0568424296434156E-5	[APOE, ARHGAP4, ARHGDIA, ARHGEF1, BAMBI, BCL9L, BMP5, C1QBP, CDKL5, CHN1, CIB1, CXXC1, DAB1, DCC, EPHB2, EPHB3, GCNT2, GLIPR2, KANK1, LIMK1, LRP8, LRRC16A, LRRC4C, LRRK2, MAP1B, MEGF8, METRN, MYADM, NDEL1, NELL1, NLGN3, NSMF, NTN1, NTRK2, NUMBL, OBSL1, PTEN, PTPRO, RAC3, RAPGEF2, RTN4R, RYK, SDC2, SEMA3A, SEMA3F, SEMA7A, SFRP1, SHANK3, SLIT1, SLIT3, STK11, STK25, TGFB1I1, TNFRSF12A, TRIOBP, TWF2,…
GO:0010770	positive regulation of cell morphogenesis involved in differentiation	12	25.5319	0.0286074	[BAMBI, BCL9L, C1QBP, CIB1, GCNT2, GLIPR2, LRRC16A, MYADM, RAC3, TGFB1I1, TRIOBP, TWIST1]
GO:0010810	regulation of cell-substrate adhesion	33	23.741	0.00179734	[ARHGAP6, ARL2, C1QBP, CCDC80, CDK6, CDKN2A, CIB1, COL26A1, CSF1, CXXC1, DDR1, EMILIN1, EMP2, FZD4, GCNT2, GPM6B, HSD17B12, ITGA5, KANK1, LRRC16A, MYADM, NF2, PLAU, PPM1F, PTEN, PTPRO, RAC3, RELL2, SFRP1, SPOCK1, SPOCK2, TRIOBP, UTRN]
GO:0010811	positive regulation of cell-substrate adhesion	21	25	0.00611069	[ARL2, C1QBP, CCDC80, CDK6, CIB1, COL26A1, CSF1, CXXC1, EMILIN1, EMP2, HSD17B12, ITGA5, LRRC16A, MYADM, PPM1F, RAC3, RELL2, SFRP1, SPOCK2, TRIOBP, UTRN]
GO:0010866	regulation of triglyceride biosynthetic process	6	42.8571	0.00887983	[FBXW7, FITM2, NR1H2, SCARB1, SIK1, SREBF1]
GO:0010876	lipid localization	56	20.5128	0.00267342	[ABCA1, ABCA2, ABCA5, ACSL1, ACSL4, AKR1C1, ALKBH7, AMH, APOC1, APOE, APOM, ATP10D, ATP11B, ATP9A, BSCL2, CLU, EHD1, FABP3, FAM58A, FBXW7, FITM2, FZD4, GLTPD1, HDLBP, ITGB3, LDLRAP1, LPL, LRP6, MEST, MIF, NFKB1, NFKBIA, NR1H2, OSBP2, OSBPL5, PITPNM1, PLA2G4A, PLA2G6, PLA2R1, PNPLA2, PRELID1, PRKAG2, PRKCD, REPIN1, SCARB1, SCP2, SIGMAR1, SLC27A4, SLC9A3R1, SPNS1, STARD5, STAT5A, STRA6, TSPO, VPS51…
GO:0010883	regulation of lipid storage	14	35	8.143977377844704E-4	[ABCA1, ALKBH7, EHD1, FBXW7, FITM2, ITGB3, LPL, MEST, NFKB1, NFKBIA, NR1H2, PNPLA2, SCARB1, ZC3H12A]
GO:0010884	positive regulation of lipid storage	7	36.8421	0.0122982	[EHD1, FITM2, LPL, NFKB1, NR1H2, SCARB1, ZC3H12A]
GO:0010885	regulation of cholesterol storage	5	35.7143	0.03818	[ABCA1, EHD1, LPL, NR1H2, SCARB1]
GO:0010927	cellular component assembly involved in morphogenesis	37	19.4737	0.0275886	[ACTG1, ATP6V0D1, B9D2, CAPN3, CASC5, CEP89, CFLAR, DICER1, E2F4, EDN1, EPB41L3, FBF1, FHOD3, FLNA, FUZ, IFT80, KIF3A, LAMA5, LRRC6, MPP5, MYH10, MYH3, NEK1, NME5, OBSCN, OBSL1, OCRL, PCNT, PRKAR1A, PVRL2, RSG1, SPAG16, SPEF2, SRF, TENM4, TPM1, UGT8]
GO:0010941	regulation of cell death	243	17.4694	2.323787374865391E-4	[AATF, ACKR3, ACTN1, ACTN2, ACTN4, ADAMTSL4, ADM, AES, AGRN, ALK, AMH, ANXA5, APAF1, APC, APOE, ARHGAP4, ARHGDIA, ARHGEF16, ARHGEF17, ARHGEF18, ARRB2, ATAD3A, ATF5, ATP7A, BAD, BAG3, BAX, BCAR1, BCL2L12, BCL2L13, BCL2L14, BCL3, BEX1, BEX2, BID, BMP5, BOK, BRMS1, BTG1, C1QBP, CACYBP, CAPN10, CAPN3, CARD10, CARD8, CBS, CBX4, CD248, CDKN2A, CFLAR, CHD8, CHERP, CIB1, CLN3, CLU, CNR1, CNTFR, COL18A1, …
GO:0010942	positive regulation of cell death	87	20.2326	3.493566427278107E-4	[AATF, ADAMTSL4, ADM, AES, AGRN, APAF1, APC, ARHGAP4, ARHGEF16, ARHGEF17, ARHGEF18, ARRB2, BAD, BAX, BID, BOK, BRMS1, BTG1, C1QBP, CAPN10, CD248, CDKN2A, CLU, CNR1, COL18A1, DCC, DHODH, DLC1, DNM2, DUSP6, EPHA7, FASN, FGD3, FLCN, GAL, GRIK5, HMGA2, ID3, IFIT2, ITGB3BP, JAK3, JMY, KALRN, KATNB1, KLF11, LPAR1, LRP6, LRRK2, MAP2K7, MAP3K11, MAP3K9, MARK4, MEN1, NOTCH2, NOX4, NR4A1, OBSCN, PAK3, PDCD…
GO:0010948	negative regulation of cell cycle process	46	18.254	0.0431807	[AMH, ANAPC11, ANAPC15, APC, AURKAIP1, CDK9, CFH, CRADD, DDX39B, DGKZ, E2F7, E2F8, FBXO43, FBXW7, HMGA2, IER3, KANK2, MAD1L1, MDC1, MDM2, MDM4, MIF, NABP2, NUBP2, PAK3, PIDD, PLK2, PML, PRKAR1A, PSMB10, PSMF1, PTEN, RB1, RBM38, RECQL4, RPS27L, RPS6KA2, SMARCA4, SOX11, TEX14, TOM1L1, UBE2C, WNT9A, XRCC3, ZNF268, ZNHIT1]
GO:0010950	positive regulation of endopeptidase activity	27	21.0938	0.0215951	[ADRM1, APAF1, ASPH, BAD, BAX, BCL2L13, BID, BOK, CARD8, CDKN2A, CRADD, DLC1, EGLN3, F2R, FASN, IFI27, MEN1, NLRP1, PIDD, PML, PPM1F, PRELID1, RPS27L, SENP1, SNCA, TRAF2, UACA]
GO:0010952	positive regulation of peptidase activity	28	21.2121	0.0182447	[ADRM1, APAF1, ASPH, BAD, BAX, BCL2L13, BID, BOK, CARD8, CDKN2A, CRADD, CTSH, DLC1, EGLN3, F2R, FASN, IFI27, MEN1, NLRP1, PIDD, PML, PPM1F, PRELID1, RPS27L, SENP1, SNCA, TRAF2, UACA]
GO:0010955	negative regulation of protein processing	14	23.3333	0.0393782	[A2M, BCL2L12, CLN3, GIPC1, GLG1, MASP1, MDM2, NELL1, NR1H2, PSMF1, SENP1, SERPING1, TIMP1, TIMP3]
GO:0010959	regulation of metal ion transport	47	19.8312	0.0105223	[ACTN2, ACTN4, AKAP6, ANK3, ARRB2, ASPH, ATP2B4, BAX, CACNA1B, CACNB2, CACNB4, CAPN3, CFH, CNKSR3, F2R, FGF12, FGF14, GNAI2, GNAO1, GPD1L, GSTM2, HBP1, JPH4, KCNH2, KCNJ2, MYO5A, NANOS1, NEDD4L, NOS3, PDGFB, PLA2G6, PML, PRKCA, SCN3B, SIK1, SLC30A1, SLC8A1, SLC9A3R1, SNCA, TIMP1, TRPC3, TRPV3, TSPO, UBASH3B, UTRN, WFS1, WWP2]
GO:0010975	regulation of neuron projection development	59	21.147	9.857853685491884E-4	[APOE, ARHGAP4, ARHGDIA, ARHGEF1, BMP5, CDKL5, CHN1, CIB1, CNR1, CXXC1, DAB1, DBN1, DCC, DISC1, DVL1, EPHB2, EPHB3, KANK1, KATNB1, LIMK1, LPAR1, LRP8, LRRC4C, LRRK2, MAGI2, MAP1B, MEGF8, METRN, NCS1, NDEL1, NELL1, NLGN3, NSMF, NTN1, NTRK2, NUMBL, OBSL1, PTEN, PTPRO, RAPGEF1, RAPGEF2, RTN4R, RYK, SCARF1, SDC2, SEMA3A, SEMA3F, SEMA7A, SHANK3, SLIT1, SLIT3, SPOCK1, STK11, STK25, TNFRSF12A, TWF2, ULK…
GO:0012501	programmed cell death	307	17.1604	1.2695614628175487E-4	[AATF, ACKR3, ACTN1, ACTN2, ACTN4, ADAMTSL4, ADM, AES, AGRN, AIMP2, ALDOC, ALK, ALKBH7, AMH, ANXA5, APAF1, APC, APOE, ARHGAP4, ARHGDIA, ARHGEF16, ARHGEF17, ARHGEF18, ARRB2, ATAD3A, ATCAY, ATF5, ATG4D, ATN1, ATP7A, AXIN1, BAD, BAG3, BAX, BCAR1, BCL2L12, BCL2L13, BCL2L14, BCL3, BCL7C, BEX1, BEX2, BID, BLOC1S2, BMP5, BOK, BRMS1, BTG1, C1QBP, C6orf120, CAPN10, CAPN3, CARD10, CARD8, CBS, CBX4, CD248, …
GO:0014812	muscle cell migration	11	24.4444	0.0471186	[DDR1, IGFBP5, ITGB3, LPAR1, NELL1, NOX4, PARVA, PDGFB, PLAU, PLXNA1, THBS4]
GO:0014841	satellite cell proliferation	3	60	0.022992	[CFLAR, MEGF10, PAXBP1]
GO:0014909	smooth muscle cell migration	10	26.3158	0.0359802	[DDR1, IGFBP5, ITGB3, LPAR1, NELL1, NOX4, PARVA, PDGFB, PLAU, PLXNA1]
GO:0015711	organic anion transport	64	18.3908	0.0173317	[ABCA1, ABCC5, ACSL1, ACSL4, AKR1C1, AMH, APOC1, APOE, ATP10D, ATP11B, ATP9A, CA14, CACNB4, CLN3, FABP3, GIPC1, GLTPD1, KCNJ10, MFSD10, MIF, NFKBIE, NTRK2, PDPN, PITPNM1, PLA2G4A, PLA2G6, PLA2R1, PQLC2, PRAF2, PRELID1, PRKAG2, PRKCD, RAB3A, REPIN1, SCARB1, SCP2, SERINC1, SLC19A1, SLC22A5, SLC25A1, SLC25A10, SLC25A22, SLC25A32, SLC25A42, SLC25A6, SLC27A4, SLC35D1, SLC38A10, SLC38A3, SLC4A2, SLC4A4…
GO:0015748	organophosphate ester transport	16	23.5294	0.0269106	[ABCA1, APOC1, APOE, ATP10D, ATP11B, ATP9A, G6PC3, GLTPD1, PITPNM1, PRELID1, PRKCD, SCARB1, SCP2, SLC25A42, SLC25A6, SLC35D1]
GO:0015914	phospholipid transport	12	26.087	0.0243597	[ABCA1, APOC1, APOE, ATP10D, ATP11B, ATP9A, GLTPD1, PITPNM1, PRELID1, PRKCD, SCARB1, SCP2]
GO:0015918	sterol transport	18	26.4706	0.00570568	[ABCA1, ABCA2, ABCA5, AKR1C1, APOC1, APOE, APOM, CLU, FAM58A, LDLRAP1, LRP6, NFKB1, NFKBIA, NR1H2, OSBPL5, SCARB1, SCP2, TSPO]
GO:0015936	coenzyme A metabolic process	7	38.8889	0.0088343	[ACOT7, COASY, DCAKD, MCCC2, NUDT7, PANK2, PPCS]
GO:0015937	coenzyme A biosynthetic process	5	45.4545	0.0127092	[ACOT7, COASY, DCAKD, PANK2, PPCS]
GO:0016049	cell growth	82	19.2488	0.00230976	[ACSL4, AGTR1, AKAP6, APOE, ARHGAP4, ATAD3A, ATP6V0E2, BCAR1, BIN3, BTG1, CD320, CDKL5, CDKN2A, CDKN2C, CFH, CIB1, CISH, CXXC1, CYBA, DCC, DDR1, DDX5, DNAJC2, DNPH1, DVL1, EDN1, EGLN2, FAM107A, FLCN, GAS2L1, HYAL2, IGFBP2, IGFBP5, IGFBPL1, IL17RB, ING1, LIMK1, LMNB2, LTBP4, MAP1B, MEGF8, MUC12, NDEL1, NELL1, NELL2, NLGN3, NOL8, NOTCH2, NPR1, NTN1, NUBP2, OGFR, PAK3, PAK4, PDGFB, PLXNA1, PML, PPP2…
GO:0016188	synaptic vesicle maturation	5	62.5	0.00223368	[LLGL1, RAB3A, SYP, UNC13A, ZDHHC15]
GO:0016310	phosphorylation	278	16.747	0.00128374	[ACD, ACKR3, ACSL1, ACVR2A, ADCY1, ADCY2, ADCY6, ADRBK1, AK4, AK5, ALK, AMH, ANKRD6, APC, APLN, APOE, ARFGAP1, ARRB2, ATP5D, ATP6V0D1, ATP7A, AXIN1, BAD, BAX, BCKDK, BMP5, BRSK1, CACTIN, CARD10, CBS, CCNB3, CCND3, CDC25B, CDC37, CDK6, CDK9, CDKL5, CDKN1C, CDKN2A, CDKN2C, CIB1, CLK1, CLK3, CLK4, CNKSR3, CSF1, CSNK1G2, CTBP1, CTSH, CXXC1, DAB1, DAK, DAPK3, DCC, DDR1, DGKZ, DLG2, DOK5, DUSP16, DUSP2…
GO:0016358	dendrite development	32	19.3939	0.0402472	[ACSL4, ATP7A, BMP5, CDKL5, DAB1, DBN1, DCC, DVL1, EPHB2, EPHB3, LLGL1, LPAR1, LRP8, LRRK2, MAP1B, NELL1, NFKBIL1, NLGN3, NSMF, NTRK2, NUMBL, OBSL1, PAK3, PTEN, RAPGEF2, SCARF1, SDC2, SEMA3A, SH2D3C, SHANK3, SLITRK5, SRGAP3]
GO:0016477	cell migration	180	17.561	0.00119216	[ABHD6, AGTR1, AMOT, APC, APOE, ARHGAP24, ARHGAP4, ARHGEF16, ARRB2, ARX, ASTN1, ATN1, ATP1B1, ATP1B3, BAMBI, BAX, BCAR1, BMP5, BSG, BTG1, C1QBP, CD151, CD248, CDKL5, CIB1, CNN2, CNOT6, COL18A1, COL5A1, CORO1A, CORO1B, CSF1, CTSH, CXXC1, DAB1, DCC, DDR1, DEAF1, DGKZ, DHX34, DISC1, DLC1, DNER, EDN1, EGFL7, ENC1, EPHA2, EPHB3, F11R, F2R, F2RL1, FGFR4, FLCN, FOXB1, FSCN1, FZD3, FZD9, GCNT2, GIPC1, GL…
GO:0018126	protein hydroxylation	3	60	0.022992	[ASPH, EGLN3, HIF1AN]
GO:0018130	heterocycle biosynthetic process	606	15.0559	0.0434938	[AATF, ABCA1, ABCA2, ABHD14B, ABLIM1, ABLIM2, ACOT7, ACVR2A, ADCY1, ADCY2, ADCY6, ADK, ADM, ADRM1, AEBP1, AES, AGO1, AGO2, AGRN, AK4, AK5, AKAP12, AKAP17A, AKAP5, AKAP6, ALDOA, ALK, AMH, ANP32A, APOE, APRT, ARHGEF10L, ARID3A, ARID5A, ARMCX3, ARRB2, ARX, ASCC2, ASCC3, ASPH, ATF5, ATIC, ATN1, ATOH8, ATP5D, ATRX, AURKAIP1, AXIN1, BAHD1, BAMBI, BANP, BAZ2B, BCL2L12, BCL3, BCL9L, BEX1, BEX2, BLOC1S2, …
GO:0018193	peptidyl-amino acid modification	138	16.7476	0.0205908	[ADRBK1, ALG10, ALG12, ALG3, ALK, AMH, ARID5A, ARRB2, ASPH, ATP2B4, ATP7A, AXIN1, B4GALT2, BAX, CARM1, CLK1, CNKSR3, CRTAP, CTBP1, CTH, DDR1, DERL3, DOHH, DOLPP1, DPH1, DPH2, DPM2, DPM3, EGLN2, EGLN3, EP400, EPHA2, EPHA7, EPHB2, F2R, FBXW7, FGFR4, FKBP10, FKBP2, FKBP8, FLCN, FURIN, GDF15, GPD1L, GPI, HCFC1, HIF1AN, HMGA2, HYAL2, INSR, ITGA5, ITGB3, JADE2, JAK3, KAT2B, KIT, KITLG, LATS1, LDB2, LMA…
GO:0018208	peptidyl-proline modification	10	32.2581	0.00853762	[CRTAP, EGLN2, EGLN3, FKBP10, FKBP2, FKBP8, NTMT1, P4HA2, P4HB, PIN1]
GO:0018401	peptidyl-proline hydroxylation to 4-hydroxy-L-proline	4	66.6667	0.00482332	[EGLN2, EGLN3, P4HA2, P4HB]
GO:0019219	regulation of nucleobase-containing compound metabolic process	604	15.4121	0.00798502	[AATF, ABCA1, ABCA2, ABHD14B, ABLIM1, ABLIM2, ACAP3, ACD, ACVR2A, ADM, AES, AGAP3, AGO1, AGO2, AGRN, AHSA1, AKAP12, AKAP17A, AKAP5, AKAP6, ALK, AMH, AMOT, ANP32A, APOE, ARFGAP1, ARHGAP24, ARHGAP6, ARHGEF1, ARHGEF10L, ARHGEF16, ARHGEF17, ARHGEF18, ARHGEF19, ARID3A, ARID5A, ARL2, ARMCX3, ARRB2, ASCC2, ASCC3, ASPH, ATF5, ATN1, ATOH8, ATP6V0D1, ATRX, AURKAIP1, AXIN1, BAHD1, BAMBI, BANP, BAX, BAZ2B, B…
GO:0019220	regulation of phosphate metabolic process	268	16.1446	0.0108038	[ABCA1, ACAP3, ACD, ACKR3, ACSL1, ACVR2A, ADCY1, ADCY2, ADCY6, ADM, AGAP3, AGRN, AHSA1, AKAP12, AKAP5, AKAP6, ALK, AMH, AMOT, ANKRD6, APC, APLN, APOC1, APOE, ARFGAP1, ARHGAP24, ARHGAP6, ARHGEF1, ARHGEF10L, ARHGEF16, ARHGEF17, ARHGEF18, ARHGEF19, ARL2, ARRB2, ATP6V0D1, ATP7A, AXIN1, BAD, BAX, BMP5, BVES, CACTIN, CARD10, CASC5, CBS, CCNB3, CCND3, CDC25B, CDC37, CDKL5, CDKN1C, CDKN2A, CDKN2C, CHN1, …
GO:0019222	regulation of metabolic process	862	15.2324	0.00373117	[A2M, AATF, ABCA1, ABCA2, ABHD14B, ABLIM1, ABLIM2, ACAP3, ACD, ACKR3, ACSL1, ACVR2A, ADCY1, ADCY2, ADCY6, ADK, ADM, ADRBK1, ADRM1, AES, AGAP3, AGO1, AGO2, AGRN, AGTR1, AHSA1, AIMP2, AKAP12, AKAP17A, AKAP5, AKAP6, AKR1C1, ALK, AMH, AMOT, ANAPC11, ANK3, ANKRD6, ANP32A, ANXA5, AP2A1, APAF1, APBA2, APBA3, APC, APLN, APOC1, APOE, APOM, ARF1, ARFGAP1, ARHGAP24, ARHGAP6, ARHGDIA, ARHGEF1, ARHGEF10L, ARH…
GO:0019262	N-acetylneuraminate catabolic process	3	75	0.0102844	[AMDHD2, NAGK, NPL]
GO:0019432	triglyceride biosynthetic process	14	24.1379	0.0301743	[ACSL1, ACSL4, AGPAT2, FASN, FBXW7, FITM2, GPD1L, HSD17B12, LPL, NR1H2, SCARB1, SIK1, SLC25A1, SREBF1]
GO:0019438	aromatic compound biosynthetic process	610	15.1402	0.0294537	[AATF, ABCA1, ABCA2, ABHD14B, ABLIM1, ABLIM2, ACOT7, ACVR2A, ADCY1, ADCY2, ADCY6, ADK, ADM, ADRM1, AEBP1, AES, AGO1, AGO2, AGRN, AK4, AK5, AKAP12, AKAP17A, AKAP5, AKAP6, ALDOA, ALK, AMH, ANP32A, APOE, APRT, ARHGEF10L, ARID3A, ARID5A, ARMCX3, ARRB2, ARX, ASCC2, ASCC3, ASPH, ATF5, ATIC, ATN1, ATOH8, ATP5D, ATP7A, ATRX, AURKAIP1, AXIN1, BAHD1, BAMBI, BANP, BAZ2B, BCL2L12, BCL3, BCL9L, BEX1, BEX2, BL…
GO:0019439	aromatic compound catabolic process	187	16.4468	0.0158722	[ABCA2, ACAP3, AGAP3, AGO1, AGO2, AGRN, AHSA1, AMOT, APAF1, ARF1, ARFGAP1, ARHGAP24, ARHGAP6, ARHGEF1, ARHGEF10L, ARHGEF16, ARHGEF17, ARHGEF18, ARHGEF19, ARL2, ARL8A, ARRB2, ATP5D, AXIN1, BAX, BLVRA, BVES, CCBL1, CDKL5, CDKN2A, CHD8, CHN1, CHN2, CNOT3, CNOT6, COMT, CPEB2, DCTPP1, DDX17, DDX39B, DDX54, DENND3, DENND4A, DENND4B, DENND5B, DHX34, DLC1, DNAJB6, DNASE2, DNM2, DNM3, DNPH1, EDC4, ENPP3, …
GO:0019471	4-hydroxyproline metabolic process	4	40	0.0420875	[EGLN2, EGLN3, P4HA2, P4HB]
GO:0019511	peptidyl-proline hydroxylation	5	62.5	0.00223368	[CRTAP, EGLN2, EGLN3, P4HA2, P4HB]
GO:0019637	organophosphate metabolic process	274	17.7691	2.597911334765591E-5	[ABCA1, ABCA2, ACAP3, ACOT7, ADCY1, ADCY2, ADCY6, ADK, ADM, AGAP3, AGPAT2, AGRN, AHSA1, AK4, AK5, AKAP12, AKAP5, AKAP6, ALDOA, ALDOC, AMOT, APOC1, APOE, APRT, ARF1, ARFGAP1, ARHGAP24, ARHGAP6, ARHGEF1, ARHGEF10L, ARHGEF16, ARHGEF17, ARHGEF18, ARHGEF19, ARL2, ARL8A, ARRB2, ATIC, ATP2B4, ATP5D, ATP6V1A, AXIN1, BAD, BVES, CACNB4, CBS, CDKL5, CDS2, CHD8, CHN1, CHN2, CLN3, COASY, CPEB2, CPS1, CSGALNAC…
GO:0019692	deoxyribose phosphate metabolic process	9	27.2727	0.0367556	[ADK, AK5, GUK1, MPG, MUTYH, NT5C, NTHL1, NUDT16, TDG]
GO:0019693	ribose phosphate metabolic process	167	17.2878	0.00344441	[ABCA1, ABCA2, ACAP3, ACOT7, ADCY2, ADCY6, ADK, ADM, AGAP3, AGRN, AK4, AK5, AKAP12, AKAP5, AKAP6, ALDOA, AMOT, APOE, APRT, ARF1, ARFGAP1, ARHGAP24, ARHGAP6, ARHGEF1, ARHGEF10L, ARHGEF16, ARHGEF17, ARHGEF18, ARHGEF19, ARL2, ARL8A, ARRB2, ATIC, ATP2B4, ATP5D, ATP6V1A, AXIN1, BAD, BVES, CACNB4, CBS, CDKL5, CHD8, CHN1, CHN2, COASY, CPEB2, DCAKD, DDX17, DDX39B, DDX54, DENND3, DENND4A, DENND4B, DENND5B…
GO:0019748	secondary metabolic process	12	24.4898	0.0386626	[AKR1C1, AKR7A2, ATN1, BDH2, CBR4, CYP2D6, DDT, FAM58A, MYO5A, PGAM1, PMEL, RAPGEF2]
GO:0019752	carboxylic acid metabolic process	161	16.3286	0.0301529	[ABHD14A-ACY1, ACOT2, ACOT7, ACOX2, ACSBG1, ACSF2, ACSL1, ACSL4, ACSS1, ACY1, ADC, AIMP2, AKR1C1, ALKBH7, AMDHD2, AMH, APOC1, ATCAY, ATIC, ATP7A, BCAT2, BCKDK, BDH2, BSG, C9orf3, CBR1, CBR4, CBS, CCBL1, CFH, CHST12, CHST14, CLN3, CNR1, COASY, COMT, CPS1, CRABP2, CRYL1, CSGALNACT1, CTH, CYB5A, CYB5R3, CYP27A1, CYP2U1, DAGLA, DOHH, DSEL, EARS2, ECH1, ECHDC2, ECI1, EDN1, EGLN2, EGLN3, FABP3, FAM213B…
GO:0019915	lipid storage	16	27.5862	0.00579835	[ABCA1, ALKBH7, BSCL2, EHD1, FBXW7, FITM2, ITGB3, LPL, MEST, NFKB1, NFKBIA, NR1H2, PNPLA2, SCARB1, STAT5A, ZC3H12A]
GO:0021537	telencephalon development	38	19.3878	0.0275386	[ARX, ATF5, ATIC, BAX, CDK6, CNTNAP2, DAB1, DICER1, DISC1, EFNA2, EPHB2, EPHB3, FOXB1, GPR56, ID4, LRP6, LRP8, LRRK2, MYH10, NCOR2, NDEL1, NTRK2, NUMBL, PCNT, POU3F3, PTEN, RARB, RYK, SALL1, SEMA3A, SHANK3, SLIT1, SLIT3, SLITRK5, SOX2, SRF, SRGAP3, WNT5A]
GO:0021575	hindbrain morphogenesis	14	25.9259	0.016621	[ATP2B4, ATP7A, CBS, DAB1, DLC1, GLI2, LDB2, LRP6, PCNT, RORA, SMOX, SPTBN2, TRNP1, ULK1]
GO:0021587	cerebellum morphogenesis	13	27.6596	0.0119705	[ATP2B4, ATP7A, CBS, DAB1, GLI2, LDB2, LRP6, PCNT, RORA, SMOX, SPTBN2, TRNP1, ULK1]
GO:0021591	ventricular system development	7	35	0.0166419	[CDK6, MBOAT7, MNAT1, MYH10, NME5, NUMBL, RAPGEF2]
GO:0021680	cerebellar Purkinje cell layer development	8	28.5714	0.0368655	[ATP2B4, ATP7A, LDB2, MYH10, NAGLU, RORA, SEZ6L2, SPTBN2]
GO:0021695	cerebellar cortex development	13	24.0741	0.0366147	[ATP2B4, ATP7A, GLI2, LDB2, MYH10, NAGLU, PCNT, RORA, SEZ6L2, SMOX, SPTBN2, TRNP1, ULK1]
GO:0021696	cerebellar cortex morphogenesis	10	27.027	0.030243	[ATP2B4, ATP7A, GLI2, LDB2, PCNT, RORA, SMOX, SPTBN2, TRNP1, ULK1]
GO:0021772	olfactory bulb development	12	34.2857	0.00231729	[ARX, ATF5, DICER1, EFNA2, LRRK2, PCNT, SALL1, SEMA3A, SLIT1, SLIT3, SRF, WNT5A]
GO:0021872	forebrain generation of neurons	15	25	0.0187113	[ARX, ATF5, ATP7A, AXIN1, DICER1, LRP6, NUMBL, POU3F4, RAPGEF2, SALL1, SHANK3, SLIT1, SLIT3, SOX2, WNT5A]
GO:0021879	forebrain neuron differentiation	13	25.4902	0.0235717	[ARX, ATF5, ATP7A, AXIN1, DICER1, POU3F4, RAPGEF2, SALL1, SHANK3, SLIT1, SLIT3, SOX2, WNT5A]
GO:0021885	forebrain cell migration	14	24.5614	0.0262124	[ARX, DAB1, DISC1, FOXB1, GPR56, LRP6, LRP8, LRRK2, NDEL1, POU3F3, SLIT1, SLIT3, SRF, SRGAP3]
GO:0021889	olfactory bulb interneuron differentiation	7	41.1765	0.00614278	[ARX, ATF5, DICER1, SALL1, SLIT1, SLIT3, WNT5A]
GO:0021891	olfactory bulb interneuron development	5	41.6667	0.0192712	[ARX, ATF5, SLIT1, SLIT3, WNT5A]
GO:0021915	neural tube development	32	19.8758	0.0296425	[ADM, APAF1, DEAF1, DLC1, DVL1, DVL3, EPHA2, FKBP8, FOXB1, FUZ, FZD3, FZD9, GATAD2A, GLI2, KIF3A, LRP6, MIB1, PFN1, PKD1, PLOD3, PLXNA2, SALL1, SEMA3C, SFRP1, SMOX, SOX11, TWIST1, VASP, WNT5A, ZIC2, ZIC5, ZNF358]
GO:0021988	olfactory lobe development	12	32.4324	0.00391625	[ARX, ATF5, DICER1, EFNA2, LRRK2, PCNT, SALL1, SEMA3A, SLIT1, SLIT3, SRF, WNT5A]
GO:0022008	neurogenesis	239	17.6384	1.43816316648412E-4	[ABLIM1, ABLIM2, ACSL4, ACTB, ACTG1, ADCY1, ADM, AGRN, ALK, ANK3, AP2A1, AP2S1, APC, APOE, ARHGAP39, ARHGAP4, ARHGDIA, ARHGEF1, ARX, ASTN1, ATCAY, ATF5, ATP2B4, ATP7A, AXIN1, BAI1, BAX, BLOC1S2, BMP5, BOK, BRSK1, CACNB2, CACNB4, CDK6, CDKL5, CDKN1C, CDKN2C, CHN1, CIB1, CLMN, CLTA, CNOT6, CNR1, CNTNAP2, COL5A1, COL9A1, CXXC1, DAB1, DAGLA, DAPK3, DBN1, DCC, DICER1, DISC1, DNER, DPYSL5, DVL1, EFHD1,…
GO:0022010	central nervous system myelination	5	35.7143	0.03818	[ID4, KCNJ10, PLP1, PTEN, TENM4]
GO:0022028	tangential migration from the subventricular zone to the olfactory bulb	5	45.4545	0.0127092	[ARX, LRRK2, SLIT1, SLIT3, SRF]
GO:0022029	telencephalon cell migration	14	25.9259	0.016621	[ARX, DAB1, DISC1, FOXB1, GPR56, LRP6, LRP8, LRRK2, NDEL1, POU3F3, SLIT1, SLIT3, SRF, SRGAP3]
GO:0022037	metencephalon development	22	21.1538	0.0344757	[ATIC, ATP2B4, ATP7A, CBS, DAB1, FZD3, FZD4, FZD9, GLI2, LDB2, LRP6, MYH10, NAGLU, OTX1, PCNT, RORA, SDF4, SEZ6L2, SMOX, SPTBN2, TRNP1, ULK1]
GO:0022603	regulation of anatomical structure morphogenesis	143	19.1946	7.910987350976673E-5	[ADM, ALDOA, AMOT, ANKRD6, APC, APOE, ARHGAP4, ARHGDIA, ARHGEF1, ARHGEF18, BAI1, BAMBI, BAX, BCL9L, BMP5, BTG1, BVES, C1QBP, C21orf2, CARM1, CDC42EP1, CDKL5, CFLAR, CHN1, CIB1, COCH, CORO1A, CORO1B, CSF1, CST3, CTSH, CXXC1, DAB1, DCC, DHODH, DICER1, DLC1, DUSP6, DVL1, DVL3, EDN1, EHD1, EHD2, EPB41L3, EPHA2, EPHB2, EPHB3, EYA1, FBXW7, FERMT2, FGD3, FGFR4, FITM2, GCNT2, GLIPR2, GNA13, HDAC7, HIF1AN…
GO:0022604	regulation of cell morphogenesis	85	22.4274	9.160056573988392E-6	[ALDOA, APOE, ARHGAP4, ARHGDIA, ARHGEF1, ARHGEF18, BAMBI, BCL9L, BMP5, BVES, C1QBP, C21orf2, CDC42EP1, CDKL5, CHN1, CIB1, COCH, CORO1A, CORO1B, CXXC1, DAB1, DCC, DLC1, EPB41L3, EPHB2, EPHB3, FERMT2, FGD3, FITM2, GCNT2, GLIPR2, GNA13, KANK1, KIT, LIMK1, LRP8, LRRC16A, LRRC4C, LRRK2, MAP1B, MEGF8, METRN, MYADM, MYH10, MYH9, NDEL1, NELL1, NFKBIL1, NLGN3, NOL3, NSMF, NTN1, NTRK2, NUMBL, OBSL1, PALM2,…
GO:0022607	cellular component assembly	311	16.2572	0.00414801	[ABCA1, ACD, ACTB, ACTG1, ACTN1, ACTN2, ACTN4, ADD2, ADRM1, AGRN, AKR1C1, ALDOA, ALDOC, AMH, AMOT, ANK3, AP2S1, APC, APOC1, APOE, APOM, ARF1, ARHGAP24, ARHGAP6, ARHGEF10L, ARL2, ARPC1B, ARPC5, ATG9B, ATP6V0D1, ATP7A, AXIN1, B9D2, BAD, BAHD1, BAIAP2L2, BAX, BCS1L, BID, BIN3, C1QBP, C1QTNF3, CAPN3, CAPZA2, CARD10, CASC5, CBR4, CD151, CDC42EP1, CDKN2A, CEP89, CFLAR, CIRBP, CLGN, CLPP, CLU, CNKSR3, C…
GO:0022898	regulation of transmembrane transporter activity	27	22.1311	0.0117703	[ACTN2, ACTN4, AKAP6, ANK3, ASPH, CACNB4, CACNG8, CFH, CNIH2, FGF12, GPD1L, GSTM2, JPH4, KCNIP2, LLGL1, MYO5A, NEDD4L, NLGN3, PLA2G6, PRKCA, SCN3B, SHANK3, SLC9A3R1, TIMP1, TWIST1, UTRN, WWP2]
GO:0023014	signal transduction by phosphorylation	110	17.5719	0.00987553	[ACKR3, ALK, AMH, ANKRD6, APC, APOE, ARRB2, AXIN1, CBS, CIB1, CNKSR3, CTSH, DCC, DOK5, DUSP16, DUSP26, DUSP5, DUSP6, DUSP7, DUSP8, DVL3, EDN1, ELK1, EPHA2, EPHA7, F2R, F2RL1, FBXW7, FGF12, FGF14, FGFR4, FLCN, FZD4, GCNT2, GLIPR2, GNAI2, GPS1, GSTP1, HYAL2, IGBP1, INSR, KCNH8, KIT, KITLG, LPAR1, LRRK2, MAP2K2, MAP2K7, MAP3K11, MAP3K6, MAP3K9, MAP4K1, MAP4K3, MAPK15, MAPK3, MAPK4, MAPK7, MAPK8IP1, …
GO:0023021	termination of signal transduction	13	30.2326	0.00536869	[ADRBK1, ADRBK2, ARHGEF1, AXIN1, GRK6, MYH9, PRKCD, RGS10, RGS14, RGS19, RGS5, RGS8, SMPD1]
GO:0023035	CD40 signaling pathway	4	100	4.090340892723731E-4	[RNF31, SHARPIN, TNFAIP3, TNIP2]
GO:0023051	regulation of signaling	457	17.7407	2.930520730959693E-8	[A2M, ABCA1, ABHD6, ACAP3, ACKR3, ACVR2A, ADM, ADRBK1, ADRBK2, AES, AGAP3, AGPAT2, AGRN, AKAP12, AKAP5, AKAP6, ALK, AMH, AMOT, ANKRD6, AP2A1, AP2S1, APAF1, APC, APLN, APOE, ARF1, ARFGAP1, ARHGAP19, ARHGAP23, ARHGAP24, ARHGAP33, ARHGAP39, ARHGAP4, ARHGAP44, ARHGAP6, ARHGDIA, ARHGEF1, ARHGEF10L, ARHGEF16, ARHGEF17, ARHGEF18, ARHGEF19, ARRB2, ASPH, ATP2B4, AURKAIP1, AXIN1, BAD, BAMBI, BAX, BCL2L14, …
GO:0023056	positive regulation of signaling	201	18.0269	1.480966043074074E-4	[ACKR3, ACVR2A, AGPAT2, AKAP12, AKAP5, AKAP6, ALK, AMH, ANKRD6, APAF1, ARHGAP4, ARHGAP6, ARRB2, AXIN1, BAD, BAMBI, BAX, BCL2L14, BID, BMP5, BVES, C1QBP, CANT1, CC2D1A, CDKN1C, CDKN2A, CFLAR, CHN1, CHN2, CIB1, CLU, CRADD, CSF1, CTH, CTSC, CTSH, DAPK3, DCC, DDX17, DDX5, DDX60, DISC1, DVL1, DVL3, ECE1, EDN1, EIF2S1, EMP2, EYA1, F2R, F2RL1, FASN, FBXW7, FGFR4, FKBP8, FLCN, FLNA, FZD4, GCNT2, GIPC1, G…
GO:0023057	negative regulation of signaling	178	19.0171	1.8568101201327835E-5	[ABHD6, ACKR3, ADM, ADRBK1, ADRBK2, AES, AMH, ANKRD6, AP2A1, AP2S1, APC, APOE, ARF1, ARHGAP24, ARHGEF1, ARRB2, AXIN1, BAMBI, BAX, BCL9L, BMP5, C1QBP, CACTIN, CARD8, CD109, CFLAR, CHD8, CIB1, CISH, CLTA, CLU, CNKSR3, CTH, DAB1, DGKZ, DLC1, DLK1, DUSP16, DUSP26, DUSP5, DUSP6, DUSP7, DUSP8, EGFL7, EPHA2, EPN1, EYA1, F2RL1, FBN1, FBN2, FBXW7, FLCN, GLG1, GLIS2, GNAI2, GPD1L, GPI, GPS1, GPX1, GRIK5, G…
GO:0030029	actin filament-based process	125	21.4408	9.883639365556792E-7	[ABLIM2, ACTG1, ACTN1, ACTN2, ACTN4, ADD2, ALDOA, AMOT, ARF1, ARHGAP6, ARHGEF10L, ARHGEF17, ARHGEF18, ARHGEF19, ARPC1B, ARPC5, BAIAP2L2, BCAR1, BIN3, CAPN10, CAPN3, CAPZA2, CFLAR, CNN1, CNN2, CORO1A, CORO1B, CORO2A, CORO6, CORO7, DAAM1, DAAM2, DAPK3, DBN1, DLC1, DNAJB6, EDN1, EHD2, EPB41L3, EPB41L4B, F2RL1, FAM101B, FGD3, FGF12, FHOD1, FHOD3, FLNA, FSCN1, GJA5, GPD1L, GPM6B, INF2, JMY, JUP, KANK1…
GO:0030030	cell projection organization	224	19.6837	9.503903876061163E-8	[ABLIM1, ABLIM2, ACSL4, ACTB, ACTG1, ACTN2, ADCY1, ADM, AGRN, ANK3, AP2A1, AP2S1, APC, APOE, ARHGAP24, ARHGAP39, ARHGAP4, ARHGDIA, ARHGEF1, ARX, ATCAY, ATP2B4, ATP6V0D1, ATP7A, B9D2, BAI1, BAIAP2L2, BLOC1S2, BMP5, BRSK1, C21orf2, C5orf30, CACNB2, CACNB4, CCDC78, CDC42EP1, CDKL5, CEP89, CHN1, CIB1, CLMN, CLTA, CNR1, CNTNAP2, COL5A1, COL9A1, CORO1A, CORO1B, CROCC, CXXC1, DAB1, DBN1, DCC, DICER1, DI…
GO:0030031	cell projection assembly	49	18.3521	0.0348997	[ACTN2, AGRN, APC, ARHGAP24, ATP6V0D1, B9D2, BAIAP2L2, CDC42EP1, CEP89, DNM3, E2F4, EPHA2, F2RL1, FBF1, FGD3, FLNA, FUZ, IFT80, KANK1, KIF3A, KIT, LAMA5, LPAR1, LRRC16A, LRRC6, MTSS1L, MYH10, NCK2, NEFH, NEK1, NME5, OCRL, PCNT, PDGFB, PFN1, PPP1R16B, PRKCD, PTPRO, PXDN, RAC3, RSG1, SLC9A3R1, SPAG16, SPATA13, SPEF2, SRF, SRGAP3, TWF2, VAV3]
GO:0030036	actin cytoskeleton organization	108	21.5139	4.576915589888403E-6	[ABLIM2, ACTG1, ACTN1, ACTN4, ADD2, ALDOA, AMOT, ARF1, ARHGAP6, ARHGEF10L, ARHGEF17, ARHGEF18, ARHGEF19, ARPC1B, ARPC5, BAIAP2L2, BCAR1, BIN3, CAPN10, CAPN3, CAPZA2, CFLAR, CNN1, CNN2, CORO1A, CORO1B, CORO2A, CORO6, CORO7, DAAM1, DAAM2, DAPK3, DBN1, DLC1, DNAJB6, EDN1, EHD2, EPB41L3, EPB41L4B, F2RL1, FAM101B, FGD3, FHOD1, FHOD3, FLNA, FSCN1, GPM6B, INF2, JMY, KANK1, KIT, KLHL17, KPTN, LATS1, LIMK…
GO:0030042	actin filament depolymerization	11	25	0.0406346	[ADD2, CAPZA2, F2RL1, LRRC16A, MICAL1, PDXP, PLEKHH2, SHROOM2, SPTBN2, TRIOBP, TWF2]
GO:0030048	actin filament-based movement	23	22.1154	0.0191655	[ACTN2, FGF12, GJA5, GPD1L, JUP, KCNH2, KCNJ2, MYH10, MYH3, MYH7, MYH9, MYO1B, MYO5A, MYO7A, MYO9B, NEB, NEDD4L, PARVA, SCN3B, TPM1, TPM2, TPM3, TPM4]
GO:0030154	cell differentiation	521	16.2762	1.3387466299781344E-4	[A2M, ABCA1, ABCA5, ABLIM1, ABLIM2, ACD, ACKR3, ACSL4, ACTB, ACTG1, ACVR2A, ADAM12, ADAMTS7, ADCY1, ADM, AGRN, AGTR1, AIMP2, AKAP6, AKIP1, AKR1C1, ALDOC, ALK, AMH, AMOT, ANK3, AP2A1, AP2S1, AP3D1, APC, APOE, ARHGAP24, ARHGAP39, ARHGAP4, ARHGDIA, ARHGEF1, ARID5A, ARX, ASTN1, ATCAY, ATF5, ATOH8, ATP2B4, ATP7A, AXIN1, BAD, BAI1, BAMBI, BAX, BCL3, BCL9L, BDH2, BEX1, BEX2, BLOC1S2, BMP5, BOK, BRSK1, B…
GO:0030155	regulation of cell adhesion	68	21.1838	4.0420615312520094E-4	[ANK3, APC, ARHGAP6, ARHGDIA, ARL2, C1QBP, CCDC80, CD164, CDK6, CDKN2A, CIB1, COL26A1, CSF1, CXXC1, DAB1, DDR1, DEAF1, DUSP26, EMILIN1, EMP2, EPCAM, EPHA2, EPHA7, EPHB3, FLCN, FZD4, GCNT2, GPM6B, GPR56, HAS2, HSD17B12, ITGA5, KANK1, KIFAP3, LAMA4, LAMA5, LDB2, LPXN, LRRC16A, MAPK7, MYADM, NF2, PIEZO1, PLAU, PPAP2B, PPM1F, PPP2R1A, PRKCA, PRKCD, PRKX, PTEN, PTPRO, RAC3, RELL2, RND1, SFRP1, SIPA1, …
GO:0030162	regulation of proteolysis	38	20	0.0174616	[APOE, ASPH, AURKAIP1, AXIN1, BAD, CAPN3, CLN3, CLN6, CLU, DISC1, DVL1, FBXW7, FGFR4, FURIN, GIPC1, GPX1, HSPBP1, LRRK2, LTBP4, MDM2, NELL1, NR1H2, OGT, PKD1, PLK2, PML, PRKCA, PSMF1, PTEN, RAD23A, RHBDF1, SENP1, SERPINB9, SERPINH1, STUB1, TIMP1, TIMP3, WFS1]
GO:0030166	proteoglycan biosynthetic process	18	34.6154	1.8045790742034248E-4	[B3GALT6, B3GAT3, CANT1, CHPF, CHST12, CHST14, CHST15, CHST3, CHST7, CHST9, CHSY3, CSGALNACT1, DSEL, GAL3ST3, HS3ST5, NCAN, SLC35D1, XYLT2]
GO:0030168	platelet activation	47	18.8755	0.0245515	[A2M, ACTN1, ACTN2, ACTN4, ALDOA, APOE, ARRB2, BCAR1, CLU, DAGLA, DGKQ, DGKZ, F2R, F8, FLNA, GNA11, GNA13, GNAI2, GNG2, GP1BB, ITGB3, ITPR3, MAPK3, MMRN1, NOS3, PDGFB, PDPN, PFN1, PIP5K1C, PLA2G4A, PRKCA, PRKCD, PROS1, PTPN1, RHOB, RHOG, SERPING1, SLC7A11, SPNS1, SRF, TIMP1, TLN1, TRPC3, UBASH3B, VAV3, VEGFB, VEGFC]
GO:0030182	neuron differentiation	210	17.6768	3.275563157539874E-4	[ABLIM1, ABLIM2, ACSL4, ACTB, ACTG1, ADCY1, ADM, AGRN, ALK, ANK3, AP2A1, AP2S1, APC, APOE, ARHGAP39, ARHGAP4, ARHGDIA, ARHGEF1, ARX, ATCAY, ATF5, ATP2B4, ATP7A, AXIN1, BAI1, BLOC1S2, BMP5, BRSK1, CACNB2, CACNB4, CDKL5, CDKN1C, CHN1, CIB1, CLMN, CLTA, CNR1, CNTNAP2, COL5A1, COL9A1, CXXC1, DAB1, DAPK3, DBN1, DCC, DICER1, DISC1, DPYSL5, DVL1, EFHD1, EFNA2, EHD1, EPB41L3, EPHA2, EPHA7, EPHB2, EPHB3, …
GO:0030198	extracellular matrix organization	78	20.4188	5.189971762162756E-4	[A2M, ACTN1, ADAMTS4, ADAMTSL4, AGRN, ATP7A, BCL3, BSG, CCDC80, CD151, CIB1, COL11A1, COL18A1, COL23A1, COL26A1, COL27A1, COL5A1, COL9A1, COLGALT1, CRISPLD2, CRTAP, CSGALNACT1, CST3, CTSD, CTSL, CTSV, CXXC1, DDR1, DNAJB6, EFEMP2, EMILIN1, F11R, FBN1, FBN2, FGFR4, FURIN, GPM6B, HAS2, HSD17B12, HSPG2, ICAM3, ITGA5, ITGB3, ITGB5, LAMA4, LAMA5, LEPREL2, LMNB2, LOXL2, LTBP3, LTBP4, MFAP2, MFAP3, MMP11…
GO:0030203	glycosaminoglycan metabolic process	35	20.5882	0.0143789	[ABCC5, AGRN, AP2A1, B3GALT6, B3GAT3, B4GALT2, CHPF, CHST1, CHST12, CHST14, CHST15, CHST2, CHST3, CHST7, CHST9, CHSY3, CLN6, CSGALNACT1, DSEL, GALNS, GCNT2, HAS2, HS3ST5, HSPG2, HYAL2, ITIH4, LONP1, NAGLU, NCAN, NFKB1, PDGFB, SDC2, SLC35D1, SPOCK2, XYLT2]
GO:0030204	chondroitin sulfate metabolic process	19	32.2034	3.511051193020398E-4	[AGRN, B3GALT6, B3GAT3, CHPF, CHST12, CHST14, CHST15, CHST3, CHST7, CHST9, CHSY3, CSGALNACT1, DSEL, HSPG2, NCAN, SDC2, SLC35D1, SPOCK2, XYLT2]
GO:0030206	chondroitin sulfate biosynthetic process	12	48	5.711361024681237E-5	[B3GALT6, CHPF, CHST12, CHST15, CHST3, CHST7, CHST9, CHSY3, CSGALNACT1, NCAN, SLC35D1, XYLT2]
GO:0030213	hyaluronan biosynthetic process	5	38.4615	0.0277156	[ABCC5, AP2A1, HAS2, NFKB1, PDGFB]
GO:0030220	platelet formation	7	50	0.00160046	[CIB1, MFAP2, MYH9, NBEAL2, SRF, ZFPM1, ZNF385A]
GO:0030239	myofibril assembly	12	25.5319	0.0286074	[ACTG1, CAPN3, CFLAR, EDN1, FHOD3, MYH10, MYH3, OBSCN, OBSL1, PRKAR1A, SRF, TPM1]
GO:0030301	cholesterol transport	18	26.4706	0.00570568	[ABCA1, ABCA2, ABCA5, AKR1C1, APOC1, APOE, APOM, CLU, FAM58A, LDLRAP1, LRP6, NFKB1, NFKBIA, NR1H2, OSBPL5, SCARB1, SCP2, TSPO]
GO:0030308	negative regulation of cell growth	33	20.8861	0.0139279	[ARHGAP4, BTG1, CDKN2A, CDKN2C, CFH, CXXC1, DCC, DNAJC2, FLCN, GAS2L1, HYAL2, ING1, NELL1, NPR1, NTN1, PAK3, PML, PPP2R1A, RYK, SEMA3A, SEMA3F, SFRP1, SIPA1, SLIT1, SLIT3, SMARCA2, SMARCA4, STK11, TRO, ULK1, WFDC1, WNT3, WNT5A]
GO:0030334	regulation of cell migration	93	18.3071	0.00560065	[ABHD6, AMOT, APC, APOE, ARHGAP4, BCAR1, BMP5, C1QBP, CIB1, CNN2, COL18A1, CORO1A, CSF1, CTSH, DLC1, EDN1, EGFL7, EPHA2, F2R, F2RL1, FLCN, GCNT2, GLIPR2, GNA13, GPR56, HAS2, HDAC7, HSPB1, HYAL2, IFITM1, IGFBP5, INSR, IRS1, ITGA5, ITGB3, KANK1, KIT, LAMA4, LAMA5, LPAR1, LRRC16A, MAGI2, MPP1, MYADM, MYO1C, NBL1, NELL1, NELL2, NEXN, NF2, NOX4, NSMF, NTN1, PDGFB, PDPN, PFN1, PHLDA2, PLAU, PLXNA1, PLX…
GO:0030511	positive regulation of transforming growth factor beta receptor signaling pathway	7	30.4348	0.0359046	[AXIN1, CDKN1C, FLCN, GIPC1, MEN1, STK11, TGFB1I1]
GO:0030516	regulation of axon extension	19	36.5385	5.170569775533865E-5	[APOE, ARHGAP4, CDKL5, LIMK1, MAP1B, MEGF8, NDEL1, NELL1, NTN1, RYK, SEMA3A, SEMA3F, SEMA7A, SLIT1, SLIT3, TNFRSF12A, TWF2, WNT3, WNT5A]
GO:0030517	negative regulation of axon extension	10	43.4783	6.461192042625218E-4	[ARHGAP4, NELL1, NTN1, RYK, SEMA3A, SEMA3F, SLIT1, SLIT3, WNT3, WNT5A]
GO:0030811	regulation of nucleotide catabolic process	73	18.1592	0.0155247	[ACAP3, AGAP3, AGRN, AHSA1, AMOT, ARFGAP1, ARHGAP24, ARHGAP6, ARHGEF1, ARHGEF10L, ARHGEF16, ARHGEF17, ARHGEF18, ARHGEF19, ARL2, ARRB2, AXIN1, BVES, CDKL5, CHN1, CHN2, CPEB2, DENND3, DENND4A, DENND4B, DENND5B, DLC1, DNAJB6, EPHA2, EPHB3, FGD3, GIT1, GNAO1, KALRN, LLGL1, LRRK2, MAPK7, MLST8, NDEL1, NTRK2, OCRL, PFN1, PGAM5, PIN1, PTGES2, RAB3GAP1, RALGAPA1, RALGAPA2, RAPGEF1, RAPGEF2, RGS10, RGS14,…
GO:0030832	regulation of actin filament length	29	21.1679	0.0169683	[ADD2, ARF1, ARPC1B, ARPC5, CAPZA2, CORO1A, CORO1B, F2RL1, FHOD3, JMY, KANK1, LATS1, LRRC16A, MLST8, MYADM, NCK2, NEB, PAK3, PDXP, PFN1, PICK1, PLEKHH2, PRKCD, SHROOM2, SPTBN2, TRIOBP, TWF2, VASP, WASH6P]
GO:0030833	regulation of actin filament polymerization	24	20.1681	0.0465683	[ADD2, ARF1, ARPC1B, ARPC5, CAPZA2, CORO1A, CORO1B, FHOD3, JMY, KANK1, LATS1, LRRC16A, MLST8, MYADM, NCK2, PAK3, PFN1, PICK1, PRKCD, SPTBN2, TRIOBP, TWF2, VASP, WASH6P]
GO:0030834	regulation of actin filament depolymerization	10	25	0.0496247	[ADD2, CAPZA2, F2RL1, LRRC16A, PDXP, PLEKHH2, SHROOM2, SPTBN2, TRIOBP, TWF2]
GO:0031032	actomyosin structure organization	16	25	0.0154823	[ACTG1, CAPN3, CFLAR, CNN1, CNN2, EDN1, EPB41L4B, FHOD3, MYH10, MYH3, MYH9, OBSCN, OBSL1, PRKAR1A, SRF, TPM1]
GO:0031102	neuron projection regeneration	11	31.4286	0.00735708	[ADM, APOE, CXXC1, LMNB2, NDEL1, NREP, RTN4RL2, SCARF1, SMOX, TSPO, ULK1]
GO:0031103	axon regeneration	8	27.5862	0.0447722	[APOE, CXXC1, LMNB2, NDEL1, NREP, RTN4RL2, SCARF1, TSPO]
GO:0031175	neuron projection development	166	19.8091	3.272293491758436E-6	[ABLIM1, ABLIM2, ACSL4, ACTB, ACTG1, ADCY1, ADM, AGRN, ANK3, AP2A1, AP2S1, APC, APOE, ARHGAP39, ARHGAP4, ARHGDIA, ARHGEF1, ARX, ATCAY, ATP7A, BAI1, BLOC1S2, BMP5, BRSK1, CACNB2, CACNB4, CDKL5, CHN1, CIB1, CLMN, CLTA, CNR1, CNTNAP2, COL5A1, COL9A1, CXXC1, DAB1, DBN1, DCC, DICER1, DISC1, DPYSL5, DVL1, EFHD1, EFNA2, EHD1, EPB41L3, EPHA7, EPHB2, EPHB3, ETV1, FLOT1, FOXB1, FZD3, FZD9, GLI2, GNAO1, ITG…
GO:0031290	retinal ganglion cell axon guidance	8	34.7826	0.0111175	[EPHA7, EPHB2, EPHB3, NELL1, PTPRO, SLIT1, SLIT3, ZIC2]
GO:0031323	regulation of cellular metabolic process	777	15.2413	0.00641809	[AATF, ABCA1, ABCA2, ABHD14B, ABLIM1, ABLIM2, ACAP3, ACD, ACKR3, ACSL1, ACVR2A, ADCY1, ADCY2, ADCY6, ADM, AES, AGAP3, AGO1, AGO2, AGRN, AGTR1, AHSA1, AIMP2, AKAP12, AKAP17A, AKAP5, AKAP6, ALK, AMH, AMOT, ANAPC11, ANKRD6, ANP32A, APC, APLN, APOC1, APOE, APOM, ARF1, ARFGAP1, ARHGAP24, ARHGAP6, ARHGEF1, ARHGEF10L, ARHGEF16, ARHGEF17, ARHGEF18, ARHGEF19, ARID3A, ARID5A, ARL2, ARMCX3, ARRB2, ASCC2, AS…
GO:0031324	negative regulation of cellular metabolic process	266	16.5526	0.00313743	[AATF, ACD, AES, AGO1, AGO2, AKAP6, AMH, ANAPC11, APC, APOC1, APOE, APOM, ARID5A, ARRB2, ATCAY, ATN1, ATP2B4, AXIN1, BAHD1, BAX, BCL3, BMP5, BRMS1, C14orf169, C1QBP, C1QTNF3, CACTIN, CAPN3, CBX4, CBX5, CBX6, CD276, CDK9, CDKN1C, CDKN2A, CDKN2C, CHD8, CIB1, CLN3, CNKSR3, CNR1, COMT, CPEB2, CRTAP, CST3, CTBP1, CYP2D6, DAPK3, DDX5, DEDD, DHX34, DICER1, DLC1, DNAJB6, DNAJC2, DUSP16, DUSP26, DUSP5, DU…
GO:0031329	regulation of cellular catabolic process	129	19.5159	8.291835803179184E-5	[ACAP3, AGAP3, AGO2, AGRN, AHSA1, AMOT, APOC1, APOE, ARFGAP1, ARHGAP24, ARHGAP6, ARHGEF1, ARHGEF10L, ARHGEF16, ARHGEF17, ARHGEF18, ARHGEF19, ARL2, ARRB2, AXIN1, BAD, BAX, BVES, CDKL5, CDKN2A, CHN1, CHN2, CLN3, CLU, CNR1, CPEB2, CST3, DAPK3, DENND3, DENND4A, DENND4B, DENND5B, DHX34, DISC1, DLC1, DNAJB6, DVL1, ECD, EPHA2, EPHB3, FBXW7, FGD3, FURIN, GIPC1, GIT1, GNAO1, GPX1, HSPBP1, IER3, INSR, IRS1…
GO:0031330	negative regulation of cellular catabolic process	17	21.7949	0.0453214	[APOC1, CLN3, CNR1, CPEB2, CST3, DHX34, DLC1, FURIN, GIPC1, IER3, MAPK7, NELL1, PRELID1, SENP1, TIMP1, TIMP3, WDR6]
GO:0031344	regulation of cell projection organization	72	20	0.00149547	[AGRN, APC, APOE, ARHGAP24, ARHGAP4, ARHGDIA, ARHGEF1, BMP5, CDC42EP1, CDKL5, CHN1, CIB1, CNR1, CORO1B, CXXC1, DAB1, DBN1, DCC, DISC1, DVL1, EPHA2, EPHB2, EPHB3, F2RL1, KANK1, KATNB1, KIT, LIMK1, LPAR1, LRP8, LRRC16A, LRRC4C, LRRK2, MAGI2, MAP1B, MEGF8, METRN, NCS1, NDEL1, NELL1, NLGN3, NSMF, NTN1, NTRK2, NUMBL, OBSL1, PFN1, PPP1R16B, PRKCD, PTEN, PTPRO, RAPGEF1, RAPGEF2, RTN4R, RYK, SCARF1, SDC2…
GO:0031345	negative regulation of cell projection organization	27	24.3243	0.00311962	[ARHGAP24, ARHGAP4, ARHGDIA, ARHGEF1, CIB1, CXXC1, DAB1, DCC, EPHB2, KANK1, LPAR1, NELL1, NTN1, PRKCD, PTEN, PTPRO, RAPGEF2, RTN4R, RYK, SEMA3A, SEMA3F, SLIT1, SLIT3, SPOCK1, ULK1, WNT3, WNT5A]
GO:0031346	positive regulation of cell projection organization	39	20	0.0162143	[AGRN, APC, APOE, ARHGDIA, BMP5, CDC42EP1, CDKL5, CNR1, CORO1B, DCC, DVL1, F2RL1, KATNB1, KIT, LIMK1, LRP8, LRRC16A, MAGI2, MAP1B, MEGF8, METRN, NDEL1, NELL1, NTN1, NTRK2, NUMBL, OBSL1, PFN1, RAPGEF1, RAPGEF2, SCARF1, SEMA7A, SRF, STK11, STK25, TNFRSF12A, TWF2, WNT3, WNT5A]
GO:0031348	negative regulation of defense response	23	21.6981	0.0236945	[A2M, APOE, ARRB2, C1QBP, C1QTNF3, CD276, DEAF1, GPX1, GSTP1, IER3, IFIT1, MAPK7, MVK, NDFIP1, NFKB1, NLRX1, PRKCD, RORA, SERPING1, SHARPIN, TNFAIP3, UACA, ZFP36]
GO:0031399	regulation of protein modification process	199	16.2848	0.0191066	[ACD, ACSL1, ACVR2A, ADCY1, ADCY2, ADCY6, AIMP2, ALK, AMH, ANAPC11, APC, APOE, ARFGAP1, ARID5A, ARRB2, ATP2B4, ATP6V0D1, AXIN1, BAX, BMP5, BRMS1, CACTIN, CAPN3, CARD10, CBS, CCNB3, CCND3, CDC14B, CDC25B, CDC37, CDK9, CDKN1C, CDKN2A, CDKN2C, CIB1, CLU, CNKSR3, CRTAP, CSF1, CTBP1, CXXC1, DAB1, DISC1, DLC1, DUSP16, DUSP26, DUSP5, DUSP6, DUSP7, DUSP8, DVL1, DVL3, EDN1, EIF2S1, EPHA7, F2R, FAM129A, FA…
GO:0031400	negative regulation of protein modification process	80	20.6718	2.9769914053092426E-4	[ANAPC11, APC, APOE, ARRB2, ATP2B4, BAX, CACTIN, CAPN3, CDKN1C, CDKN2A, CDKN2C, CIB1, CNKSR3, CRTAP, CTBP1, DUSP16, DUSP26, DUSP5, DUSP6, DUSP7, DUSP8, DVL1, FAM129A, G6PD, GMFB, GPD1L, GPS1, GSTP1, HEXIM1, HMG20B, HSPB1, HYAL2, IGBP1, ISG15, KAT2B, LATS1, LIMK1, LRP6, MAPK8IP1, MEN1, MICAL1, MLLT1, MYADM, NF2, NOC2L, NUP62, OGT, PAK3, PARP10, PDCD4, PKIA, PML, PPAP2B, PPM1F, PPP2R1A, PRKAG2, PRK…
GO:0031507	heterochromatin assembly	4	50	0.0177442	[BAHD1, CDKN2A, HMGA1, HMGA2]
GO:0031589	cell-substrate adhesion	59	22.6054	1.6250933523708768E-4	[ACTN1, ACTN2, AKIP1, ARHGAP6, ARL2, BCAT2, BVES, C1QBP, CCDC80, CDK6, CDKN2A, CIB1, COL26A1, CORO1A, CSF1, CXXC1, DDR1, DLC1, EMILIN1, EMP2, EPHB3, FERMT2, FZD4, GCNT2, GPM6B, HSD17B12, ITGA5, ITGB3, KANK1, LAMA5, LRRC16A, MICALL2, MYADM, NF2, NID2, PARVA, PARVG, PEAK1, PKD1, PLAU, PPM1F, PRKX, PTEN, PTPRO, PXDN, RAC3, RADIL, RELL2, SFRP1, SORBS3, SPOCK1, SPOCK2, SRF, SRGAP3, TESK2, TNFRSF12A, T…
GO:0031638	zymogen activation	24	20.1681	0.0465683	[APAF1, ASPH, BAD, BAX, BCL2L13, BID, BOK, CARD8, CDKN2A, CRADD, CTSH, DLC1, EGLN3, F2R, FASN, IFI27, NLRP1, PIDD, PML, PRELID1, RPS27L, SENP1, SNCA, TRAF2]
GO:0031647	regulation of protein stability	30	22.7273	0.00557323	[ASPH, BAG3, CDKN2A, CLU, CRTAP, CTSH, DPM2, DPM3, FBXW7, FLNA, GIPC1, HCFC1, ISOC2, MDM2, MDM4, MYLIP, PML, PPAP2B, PRKCD, PTEN, SMOX, SNCA, TADA3, TCF3, TNIP2, USP19, USP2, WFS1, WIZ, ZBED3]
GO:0031648	protein destabilization	6	31.5789	0.0428696	[CDKN2A, CTSH, ISOC2, MDM2, MYLIP, SNCA]
GO:0031987	locomotion involved in locomotory behavior	3	50	0.0411606	[CLN6, FZD4, MYO5A]
GO:0032088	negative regulation of NF-kappaB transcription factor activity	15	22.3881	0.0469417	[ARRB2, BRMS1, CACTIN, CDKN2A, NFKBIA, NFKBIL1, PARP10, PIAS4, RBCK1, SIVA1, TCEAL7, TLR9, TNFAIP3, ZC3H12A, ZNF675]
GO:0032091	negative regulation of protein binding	13	28.8889	0.00815577	[AES, ARRB2, BAX, CARM1, DVL1, IFIT1, IFIT2, MAPK3, PEX14, PRKCD, TDG, TEX14, ZFPM1]
GO:0032102	negative regulation of response to external stimulus	36	20.5714	0.0133625	[APOE, C1QBP, C1QTNF3, CACTIN, CD109, CD276, CLN3, CXXC1, DEAF1, DVL1, GPX1, GSTP1, IER3, IFIT1, MAPK7, MVK, NBL1, NDFIP1, NELL1, NFKB1, NFKBIL1, NLRX1, PRKCD, PTEN, RORA, RYK, SEMA3A, SEMA3F, SHARPIN, SLIT1, SLIT3, TNFAIP3, UACA, WNT3, WNT5A, ZFP36]
GO:0032231	regulation of actin filament bundle assembly	15	25	0.0187113	[AMOT, ARHGAP6, ARHGEF10L, DLC1, FHOD1, LIMK1, LRRC16A, NF2, NOX4, PFN1, PPM1F, SFRP1, SHANK3, SORBS3, TPM1]
GO:0032233	positive regulation of actin filament bundle assembly	12	29.2683	0.00970094	[AMOT, ARHGEF10L, FHOD1, LIMK1, LRRC16A, NF2, NOX4, PFN1, PPM1F, SFRP1, SORBS3, TPM1]
GO:0032268	regulation of cellular protein metabolic process	249	16.4248	0.00622296	[ACD, ACSL1, ACVR2A, ADCY1, ADCY2, ADCY6, AGO1, AGO2, AGTR1, AIMP2, ALK, AMH, ANAPC11, APC, APOE, ARFGAP1, ARID5A, ARRB2, ASPH, ATP2B4, ATP6V0D1, AURKAIP1, AXIN1, BAD, BAX, BCL3, BMP5, BRMS1, C1QBP, CACTIN, CAPN3, CARD10, CBS, CCNB3, CCND3, CDC14B, CDC25B, CDC37, CDK9, CDKN1C, CDKN2A, CDKN2C, CIB1, CIRBP, CLN3, CLN6, CLU, CNKSR3, CNOT3, CNOT6, CPEB2, CRTAP, CSF1, CTBP1, CXXC1, DAB1, DAPK3, DISC1,…
GO:0032269	negative regulation of cellular protein metabolic process	105	20.9581	2.0180996794364897E-5	[AGO1, AGO2, AMH, ANAPC11, APC, APOE, ARRB2, ATP2B4, BAX, CACTIN, CAPN3, CDKN1C, CDKN2A, CDKN2C, CIB1, CLN3, CNKSR3, CPEB2, CRTAP, CTBP1, DAPK3, DUSP16, DUSP26, DUSP5, DUSP6, DUSP7, DUSP8, DVL1, EDN1, EIF4EBP1, ENC1, FAM129A, FURIN, G6PD, GIPC1, GMFB, GPD1L, GPS1, GSTP1, HEXIM1, HMG20B, HSPB1, HYAL2, IGBP1, IGFBP5, ISG15, KAT2B, LATS1, LIMK1, LRP6, MALSU1, MAPK8IP1, MEN1, MICAL1, MIF, MLLT1, MYAD…
GO:0032291	axon ensheathment in central nervous system	5	35.7143	0.03818	[ID4, KCNJ10, PLP1, PTEN, TENM4]
GO:0032313	regulation of Rab GTPase activity	11	31.4286	0.00735708	[DENND3, DENND4A, DENND4B, DENND5B, LLGL1, RAB3GAP1, RIN2, RIN3, SBF1, ST5, TBC1D10B]
GO:0032314	regulation of Rac GTPase activity	8	29.6296	0.0299537	[BVES, CHN1, EPHB3, MLST8, NTRK2, OCRL, SPATA13, STMN3]
GO:0032318	regulation of Ras GTPase activity	46	18.7755	0.0281604	[ACAP3, AGAP3, AGRN, ARFGAP1, ARHGAP24, ARHGEF1, ARHGEF10L, ARHGEF16, ARHGEF19, BVES, CDKL5, CHN1, DENND3, DENND4A, DENND4B, DENND5B, DLC1, EPHA2, EPHB3, FGD3, GIT1, LLGL1, MLST8, NDEL1, NTRK2, OCRL, PIN1, RAB3GAP1, RALGAPA1, RALGAPA2, RAPGEF1, RAPGEF2, RHOG, RIN2, RIN3, SBF1, SFRP1, SIPA1, SPATA13, SPRY1, SRGAP3, ST5, STMN3, SYDE1, TAX1BP3, TBC1D10B]
GO:0032330	regulation of chondrocyte differentiation	13	30.2326	0.00536869	[ADAMTS7, GLG1, GLI2, LOXL2, LTBP3, NKX3-2, PKDCC, RARB, RARG, RELA, SOX6, SOX9, WNT9A]
GO:0032331	negative regulation of chondrocyte differentiation	8	50	7.333827373418986E-4	[ADAMTS7, GLI2, LTBP3, NKX3-2, RARB, RARG, SOX9, WNT9A]
GO:0032366	intracellular sterol transport	6	42.8571	0.00887983	[ABCA1, ABCA2, FAM58A, LDLRAP1, LRP6, SCP2]
GO:0032367	intracellular cholesterol transport	6	42.8571	0.00887983	[ABCA1, ABCA2, FAM58A, LDLRAP1, LRP6, SCP2]
GO:0032368	regulation of lipid transport	18	22.2222	0.033833	[ABCA1, ABCA2, ACSL4, AMH, APOC1, APOE, ITGB3, MIF, NFKB1, NFKBIA, NR1H2, PLA2G6, PLA2R1, PRELID1, PRKCD, REPIN1, SCP2, TSPO]
GO:0032386	regulation of intracellular transport	70	18.0879	0.019014	[ABCA2, AKAP6, ANK3, ASPH, AXIN1, BAD, BAMBI, BAX, BCL3, BID, C1QTNF3, CAPN10, CAPN3, CDKN2A, CHERP, CIB1, EHD1, EHD2, EMD, F2R, FLNA, GOPC, GSTM2, HYAL2, IER3, JUP, KANK1, LITAF, MAP1B, MAP2K2, MAPK3, MAPK7, MDFI, MDM2, MLC1, MTCL1, MYO1C, NANOS1, NEFH, NFKBIA, NFKBIE, NFKBIL1, PAK3, PARP10, PKD1, PKDCC, PKIA, PML, PRKCA, RAB11B, RBCK1, RBM4, SCP2, SIVA1, SLC8A1, SMOX, SNCA, TIMP1, TLR9, TMEM102…
GO:0032409	regulation of transporter activity	31	22.963	0.00416413	[ACTN2, ACTN4, AKAP6, ANK3, ASPH, CACNB4, CACNG8, CFH, CNIH2, FGF12, GPD1L, GSTM2, JPH4, KCNIP2, LLGL1, MYO5A, NDFIP1, NEDD4L, NLGN3, PLA2G6, PRKCA, PRKCD, SCN3B, SGK3, SHANK3, SLC9A3R1, SNCA, TIMP1, TWIST1, UTRN, WWP2]
GO:0032410	negative regulation of transporter activity	10	25.641	0.0424303	[ACTN2, FGF12, GSTM2, NDFIP1, NEDD4L, SLC9A3R1, SNCA, TIMP1, TWIST1, WWP2]
GO:0032412	regulation of ion transmembrane transporter activity	26	22.0339	0.0140176	[ACTN2, ACTN4, AKAP6, ANK3, ASPH, CACNB4, CACNG8, CFH, CNIH2, FGF12, GPD1L, GSTM2, JPH4, KCNIP2, LLGL1, MYO5A, NEDD4L, NLGN3, PLA2G6, PRKCA, SCN3B, SHANK3, SLC9A3R1, TIMP1, UTRN, WWP2]
GO:0032456	endocytic recycling	6	35.2941	0.0250884	[EHD1, EHD2, MICALL1, MICALL2, RAB11B, RAB14]
GO:0032466	negative regulation of cytokinesis	3	100	0.00287788	[E2F7, E2F8, TEX14]
GO:0032482	Rab protein signal transduction	12	31.5789	0.00499552	[DENND3, DENND4A, DENND4B, DENND5B, LLGL1, RAB3GAP1, RIN2, RIN3, SBF1, SGSM3, ST5, TBC1D10B]
GO:0032483	regulation of Rab protein signal transduction	12	33.3333	0.00303248	[DENND3, DENND4A, DENND4B, DENND5B, LLGL1, RAB3GAP1, RIN2, RIN3, SBF1, SGSM3, ST5, TBC1D10B]
GO:0032488	Cdc42 protein signal transduction	8	32	0.0189038	[ABCA1, APOE, ARHGEF16, BVES, EPHB3, FGD3, NDEL1, TAX1BP3]
GO:0032489	regulation of Cdc42 protein signal transduction	8	32	0.0189038	[ABCA1, APOE, ARHGEF16, BVES, EPHB3, FGD3, NDEL1, TAX1BP3]
GO:0032507	maintenance of protein location in cell	27	24.7706	0.00236834	[ANK3, APC, ARL2, BCL3, CASC5, DBN1, EPB41L3, FLNA, GOPC, GPAA1, GRIK5, JUP, LATS1, MDFI, NFKBIA, NFKBIE, NFKBIL1, PEX14, PIP5K1C, PKD1, PML, RB1, TEX14, TLN1, TONSL, TRIP6, ZNF268]
GO:0032535	regulation of cellular component size	59	24.7899	9.583730311792258E-6	[ADD2, AMOT, APOE, ARF1, ARHGAP4, ARPC1B, ARPC5, ATP2B4, CAPZA2, CDKL5, CORO1A, CORO1B, CXXC1, DCC, E2F4, EDN1, F2RL1, FHOD3, INF2, JMY, KANK1, LATS1, LIMK1, LRRC16A, MAP1B, MEGF8, MLST8, MYADM, NCK2, NDEL1, NEB, NELL1, NTN1, PAK3, PDXP, PEX11A, PFN1, PICK1, PLEKHH2, PRKCD, PTEN, RARG, RPTOR, RYK, SEMA3A, SEMA3F, SEMA7A, SHROOM2, SLIT1, SLIT3, SPTBN2, TNFRSF12A, TRIOBP, TWF2, ULK1, VASP, WASH6P, …
GO:0032720	negative regulation of tumor necrosis factor production	9	27.2727	0.0367556	[ARRB2, CACTIN, GSTP1, HSF1, NFKBIL1, TNFAIP3, TSPO, TWIST1, ZC3H12A]
GO:0032802	low-density lipoprotein particle receptor catabolic process	3	75	0.0102844	[APOE, FURIN, MYLIP]
GO:0032803	regulation of low-density lipoprotein particle receptor catabolic process	3	75	0.0102844	[APOE, FURIN, MYLIP]
GO:0032844	regulation of homeostatic process	61	18.8272	0.0124089	[ACD, ACVR2A, AGTR1, AKAP6, AMH, ANK3, AP3D1, APLN, ASPH, BAD, BAX, CAPN3, CDK6, CFH, CHERP, CNR1, CXXC1, EDN1, F2R, FGF12, FGFR4, FLCN, GAS2L1, GJA5, GPD1L, GSTM2, ISG15, ITGB3, KITLG, LDB2, LRP6, LTBP3, MIF, NANOS1, NEDD4L, NPR1, NR1H2, PIM3, PLA2G6, PML, PRKCA, RORA, SCN3B, SENP1, SLC22A5, SLC30A4, SLC8A1, SNCA, STAT5A, SYBU, TIMP1, TMEM27, TNFAIP3, TNFRSF11B, TRPC3, TSC22D3, TSPO, UBASH3B, UB…
GO:0032856	activation of Ras GTPase activity	9	30	0.0201817	[ARHGAP24, ARHGEF16, EPHA2, NDEL1, RALGAPA1, RALGAPA2, RHOG, SYDE1, TAX1BP3]
GO:0032879	regulation of localization	296	17.3201	8.678974125624967E-5	[ABCA1, ABCA2, ABHD6, ACSL4, ACTN1, ACTN2, ACTN4, ADRBK1, AGTR1, AKAP5, AKAP6, ALKBH7, AMH, AMOT, ANK3, AP1G1, AP2S1, AP3D1, APC, APLN, APOC1, APOE, ARF1, ARHGAP4, ARHGDIA, ARHGEF16, ARRB2, ASPH, ASPSCR1, ASTN2, ATCAY, ATP2B4, AXIN1, BAD, BAMBI, BAX, BCAR1, BCL3, BID, BMP5, C1QBP, C1QTNF3, CACNA1B, CACNB2, CACNB4, CACNG8, CAPN10, CAPN3, CARD8, CDK6, CDKN2A, CFH, CHERP, CIB1, CNIH2, CNKSR3, CNN2, …
GO:0032933	SREBP signaling pathway	4	40	0.0420875	[ARHGEF10L, EIF2S1, FBXW7, INSIG2]
GO:0032956	regulation of actin cytoskeleton organization	47	19.5021	0.0141678	[ADD2, AMOT, ARF1, ARHGAP6, ARHGEF10L, ARHGEF19, ARPC1B, ARPC5, BAIAP2L2, CAPZA2, CORO1A, CORO1B, DAPK3, DLC1, EDN1, F2RL1, FHOD1, FHOD3, GPM6B, JMY, KANK1, LATS1, LIMK1, LRRC16A, MLST8, MYADM, NCK2, NEB, NF2, NOX4, PAK3, PDXP, PFN1, PICK1, PLEKHH2, PPM1F, PRKCD, SFRP1, SHANK3, SHROOM2, SORBS3, SPTBN2, TPM1, TRIOBP, TWF2, VASP, WASH6P]
GO:0032970	regulation of actin filament-based process	56	19.5122	0.00791945	[ADD2, AMOT, ARF1, ARHGAP6, ARHGEF10L, ARHGEF19, ARPC1B, ARPC5, BAIAP2L2, CAPZA2, CNN2, CORO1A, CORO1B, DAPK3, DLC1, EDN1, F2RL1, FGF12, FHOD1, FHOD3, GJA5, GPD1L, GPM6B, JMY, JUP, KANK1, KCNH2, KCNJ2, LATS1, LIMK1, LRRC16A, MLST8, MYADM, NCK2, NEB, NEDD4L, NF2, NOX4, PAK3, PDXP, PFN1, PICK1, PLEKHH2, PPM1F, PRKCD, SCN3B, SFRP1, SHANK3, SHROOM2, SORBS3, SPTBN2, TPM1, TRIOBP, TWF2, VASP, WASH6P]
GO:0032989	cellular component morphogenesis	237	19.916	1.3605196372287211E-8	[ABLIM1, ABLIM2, ACTB, ACTG1, ADCY1, AGRN, AKIP1, ALDOA, ANK3, AP2A1, AP2S1, APC, APOE, ARHGAP39, ARHGAP4, ARHGDIA, ARHGEF1, ARHGEF18, ARX, ATP2B4, ATP6V0D1, ATP7A, B9D2, BAI1, BAMBI, BCL9L, BIN3, BMP5, BRSK1, BVES, C1QBP, C21orf2, C5orf30, CACNB2, CACNB4, CAPN3, CASC5, CDC42EP1, CDKL5, CEP89, CFLAR, CHN1, CIB1, CLTA, COCH, COL18A1, COL5A1, COL9A1, CORO1A, CORO1B, CXXC1, DAB1, DCC, DICER1, DLC1, …
GO:0032990	cell part morphogenesis	161	19.7546	5.4419119028695536E-6	[ABLIM1, ABLIM2, ACTB, ACTG1, ADCY1, AGRN, ANK3, AP2A1, AP2S1, APC, APOE, ARHGAP39, ARHGAP4, ARHGDIA, ARHGEF1, ARX, ATP6V0D1, ATP7A, B9D2, BAI1, BRSK1, C21orf2, C5orf30, CACNB2, CACNB4, CDKL5, CEP89, CHN1, CLTA, COL5A1, COL9A1, CORO1B, CXXC1, DAB1, DCC, DICER1, DPYSL5, DVL1, E2F4, EFNA2, EPB41L3, EPHA7, EPHB2, EPHB3, ETV1, FBF1, FLNA, FLOT1, FOXB1, FUZ, FZD3, FZD9, GLI2, IFT80, ITGA5, ITGB3, KANK…
GO:0033028	myeloid cell apoptotic process	10	29.4118	0.0169305	[AMH, CDKN2A, CTSL, IRF7, KITLG, MAEA, MIF, PTEN, STAT5A, TIMP1]
GO:0033032	regulation of myeloid cell apoptotic process	9	31.0345	0.0161104	[AMH, CDKN2A, IRF7, KITLG, MAEA, MIF, PTEN, STAT5A, TIMP1]
GO:0033033	negative regulation of myeloid cell apoptotic process	7	36.8421	0.0122982	[AMH, IRF7, KITLG, MAEA, MIF, STAT5A, TIMP1]
GO:0033043	regulation of organelle organization	125	17.507	0.00704887	[ACD, ADD2, AMOT, ANAPC11, ANAPC15, APC, ARF1, ARHGAP6, ARHGEF10L, ARHGEF19, ARID5A, ARL2, ARPC1B, ARPC5, ARRB2, AURKAIP1, BAD, BAIAP2L2, BAX, BID, C1QBP, CAPZA2, CDK9, CIB1, CNOT6, CORO1A, CORO1B, CTBP1, DAPK3, DHODH, DLC1, EDN1, F2RL1, FBXO43, FHOD1, FHOD3, FLCN, GAS2L1, GPM6B, GPR3, GPX1, GRIK5, IER3, INF2, INSR, JMY, KANK1, KATNB1, KIAA1324, LATS1, LIMK1, LMAN1, LONP1, LRRC16A, MAD1L1, MALSU1…
GO:0033121	regulation of purine nucleotide catabolic process	73	18.2045	0.014695	[ACAP3, AGAP3, AGRN, AHSA1, AMOT, ARFGAP1, ARHGAP24, ARHGAP6, ARHGEF1, ARHGEF10L, ARHGEF16, ARHGEF17, ARHGEF18, ARHGEF19, ARL2, ARRB2, AXIN1, BVES, CDKL5, CHN1, CHN2, CPEB2, DENND3, DENND4A, DENND4B, DENND5B, DLC1, DNAJB6, EPHA2, EPHB3, FGD3, GIT1, GNAO1, KALRN, LLGL1, LRRK2, MAPK7, MLST8, NDEL1, NTRK2, OCRL, PFN1, PGAM5, PIN1, PTGES2, RAB3GAP1, RALGAPA1, RALGAPA2, RAPGEF1, RAPGEF2, RGS10, RGS14,…
GO:0033124	regulation of GTP catabolic process	67	18.4066	0.0149225	[ACAP3, AGAP3, AGRN, AMOT, ARFGAP1, ARHGAP24, ARHGAP6, ARHGEF1, ARHGEF10L, ARHGEF16, ARHGEF17, ARHGEF18, ARHGEF19, ARL2, ARRB2, AXIN1, BVES, CDKL5, CHN1, CHN2, CPEB2, DENND3, DENND4A, DENND4B, DENND5B, DLC1, EPHA2, EPHB3, FGD3, GIT1, GNAO1, KALRN, LLGL1, LRRK2, MLST8, NDEL1, NTRK2, OCRL, PGAM5, PIN1, PTGES2, RAB3GAP1, RALGAPA1, RALGAPA2, RAPGEF1, RAPGEF2, RGS10, RGS14, RGS19, RGS5, RGS8, RHOG, RI…
GO:0033239	negative regulation of cellular amine metabolic process	4	80	0.00181272	[APOC1, ATCAY, COMT, SNCA]
GO:0033554	cellular response to stress	243	16.701	0.00300704	[AATF, ACD, ACKR3, ADM, AGAP3, ALKBH7, AMH, ANKRD6, AP5Z1, APC, APEX2, APOE, ARFGAP1, ARHGEF10L, ASCC3, ATG9B, ATP6V0D1, ATP7A, ATRX, AXIN1, BAD, BAX, BCL3, BID, BOK, BRSK1, C17orf70, C1orf86, CAPN3, CBS, CDC14B, CDK6, CDK9, CDKN2A, CHCHD6, CIB1, CINP, CLN3, CLU, CPEB2, CRADD, CTH, CTSD, CTSV, CXXC1, DDX39B, DDX5, DERL3, DGKZ, DLC1, DUSP6, DUSP7, DVL3, E2F7, EDN1, EGLN2, EGLN3, EIF2S1, ELK1, EPHA…
GO:0033563	dorsal/ventral axon guidance	3	60	0.022992	[DCC, SLIT1, SLIT3]
GO:0033564	anterior/posterior axon guidance	3	60	0.022992	[DCC, NTN1, UNC5B]
GO:0033673	negative regulation of kinase activity	48	24.3655	9.867978579129015E-5	[APC, APOE, CDKN1C, CDKN2A, CDKN2C, DUSP16, DUSP26, DUSP5, DUSP6, DUSP7, DUSP8, DVL1, GMFB, GPS1, GSTP1, HEXIM1, HSPB1, HYAL2, KAT2B, LATS1, LRP6, MAPK8IP1, MEN1, MLLT1, NF2, NUP62, PAK3, PDCD4, PKIA, PPM1F, PPP2R1A, PRKAG2, PRKAR1A, PRKAR1B, PRKCA, PRKCD, PTEN, RB1, RGS14, SFRP1, SH3BP5, SMPD1, SPRY1, STK38, TNFAIP3, UBASH3B, ZGPAT, ZNF675]
GO:0033762	response to glucagon	13	26.5306	0.0170342	[ADCY1, ADCY2, ADCY6, CPS1, GNG11, GNG2, GNG5, GNG7, PRKAR1A, PRKAR1B, PRKCA, SREBF1, STK11]
GO:0034122	negative regulation of toll-like receptor signaling pathway	7	33.3333	0.0219659	[ARRB2, CACTIN, F2RL1, NFKBIL1, PIK3AP1, TLR9, TNFAIP3]
GO:0034134	toll-like receptor 2 signaling pathway	20	24.6914	0.00848051	[DUSP6, DUSP7, ELK1, F2RL1, KCNH8, MAP2K2, MAP2K7, MAPK3, MAPK7, MYD88, NFKB1, NFKB2, NFKBIA, NFKBIB, PELI2, PIK3AP1, RELA, RPS6KA2, TNFAIP3, TNIP2]
GO:0034138	toll-like receptor 3 signaling pathway	20	22.7273	0.0209382	[DUSP6, DUSP7, ELK1, F2RL1, IRF7, KCNH8, MAP2K2, MAP2K7, MAPK3, MAPK7, NFKB1, NFKB2, NFKBIA, NFKBIB, RELA, RFTN1, RPS6KA2, TICAM1, TNFAIP3, TNIP2]
GO:0034146	toll-like receptor 5 signaling pathway	17	24.6377	0.014826	[DUSP6, DUSP7, ELK1, KCNH8, MAP2K2, MAP2K7, MAPK3, MAPK7, MYD88, NFKB1, NFKB2, NFKBIA, NFKBIB, PELI2, RELA, RPS6KA2, TNFAIP3]
GO:0034162	toll-like receptor 9 signaling pathway	20	25.641	0.00544394	[DUSP6, DUSP7, ELK1, IRF7, KCNH8, MAP2K2, MAP2K7, MAPK3, MAPK7, MYD88, NFKB1, NFKB2, NFKBIA, NFKBIB, PELI2, PIK3AP1, RELA, RPS6KA2, TLR9, TNIP2]
GO:0034166	toll-like receptor 10 signaling pathway	16	23.5294	0.0269106	[DUSP6, DUSP7, ELK1, KCNH8, MAP2K2, MAP2K7, MAPK3, MAPK7, MYD88, NFKB1, NFKB2, NFKBIA, NFKBIB, PELI2, RELA, RPS6KA2]
GO:0034201	response to oleic acid	3	50	0.0411606	[ACSL1, BAD, CPS1]
GO:0034329	cell junction assembly	55	26.3158	2.8331038025597055E-6	[ACTB, ACTG1, ACTN1, ACTN2, ACTN4, AMOT, APC, ARHGAP6, ARL2, CD151, DLC1, EPB41L3, F11R, FBF1, FERMT2, FLCN, FLNA, FRMPD2, GJA5, GPM6B, HDAC7, ITGA5, ITGB3, JUP, LAMA4, LAMA5, LIMS2, MICALL2, MLLT4, MPP5, MPP7, MYO1C, NEDD4L, PARD6A, PARVA, PIP5K1C, PLEC, PPM1F, PRKCA, PTEN, PTPRO, PVR, PVRL1, PVRL2, PXDN, RAPGEF1, RAPGEF2, SFRP1, SRF, TESK1, TESK2, TLN1, TRIP6, UGT8, VASP]
GO:0034330	cell junction organization	59	24.8945	8.345454907138386E-6	[ACTB, ACTG1, ACTN1, ACTN2, ACTN4, AMOT, APC, ARHGAP6, ARL2, CD151, DLC1, EPB41L3, F11R, FBF1, FERMT2, FLCN, FLNA, FRMPD2, GJA5, GPM6B, HDAC7, ITGA5, ITGB3, JUP, LAMA4, LAMA5, LIMS2, MICALL2, MLLT4, MPP5, MPP7, MYADM, MYO1C, NEDD4L, NF2, NUMBL, PARD6A, PARVA, PIP5K1C, PLEC, PPM1F, PRKCA, PTEN, PTPRO, PVR, PVRL1, PVRL2, PXDN, RAPGEF1, RAPGEF2, SFRP1, SHROOM2, SRF, TESK1, TESK2, TLN1, TRIP6, UGT8, …
GO:0034332	adherens junction organization	22	21.3592	0.0312371	[ACTB, ACTG1, ACTN1, ACTN2, ARHGAP6, DLC1, FERMT2, GPM6B, JUP, LAMA5, MLLT4, NUMBL, PIP5K1C, PPM1F, PTEN, PVR, PVRL1, PVRL2, PXDN, SFRP1, TESK2, TRIP6]
GO:0034349	glial cell apoptotic process	6	42.8571	0.00887983	[BID, PRKCA, PRKCD, RB1, TNFRSF21, TRAF2]
GO:0034377	plasma lipoprotein particle assembly	6	33.3333	0.0332155	[ABCA1, APOC1, APOE, APOM, FECH, NR1H2]
GO:0034380	high-density lipoprotein particle assembly	4	50	0.0177442	[ABCA1, APOE, APOM, NR1H2]
GO:0034390	smooth muscle cell apoptotic process	6	42.8571	0.00887983	[ARRB2, CDKN2A, EDN1, LRP6, PDE1A, RBM10]
GO:0034391	regulation of smooth muscle cell apoptotic process	6	42.8571	0.00887983	[ARRB2, CDKN2A, EDN1, LRP6, PDE1A, RBM10]
GO:0034392	negative regulation of smooth muscle cell apoptotic process	3	60	0.022992	[ARRB2, EDN1, LRP6]
GO:0034446	substrate adhesion-dependent cell spreading	18	33.3333	3.091248449050726E-4	[AKIP1, BVES, C1QBP, CIB1, EPHB3, FERMT2, FZD4, KANK1, LAMA5, LRRC16A, MICALL2, MYADM, PARVA, PEAK1, RAC3, RADIL, SRGAP3, TRIOBP]
GO:0034498	early endosome to Golgi transport	4	80	0.00181272	[LMAN1, SNX8, SURF4, TMED9]
GO:0034599	cellular response to oxidative stress	33	20.4969	0.0181743	[AGAP3, ATP7A, CPEB2, DLC1, FANCC, G6PD, GPX1, GPX4, HSPB1, LONP1, MAPK7, MDM2, MGST1, NME5, P4HB, PLA2R1, PML, PRDX2, PXDN, PXDNL, PYCR1, RELA, RHOB, ROMO1, SLC8A1, SNCA, TMEM161A, TNFAIP3, TP53INP1, TPM1, UACA, ZNF580, ZNF622]
GO:0034613	cellular protein localization	190	16.3793	0.0176155	[ACD, ACTN2, AGAP3, AGRN, AKAP12, AKAP5, AKAP6, AMOT, ANK3, AP1B1, AP1G1, AP2A1, AP2S1, AP3D1, APC, ARHGEF16, ARL2, ARMCX3, ASPH, ASPSCR1, ASTN2, AURKAIP1, AXIN1, BAD, BAMBI, BANP, BAX, BCL3, BID, BSG, C1QTNF3, CAPN3, CASC5, CDC37, CDKN2A, CHERP, CIB1, CLTA, CLTB, CNTNAP2, DBN1, DNAJB6, DUSP16, DVL1, EHD1, EHD2, EIF2D, EMD, EPB41L3, EPHA2, EYA1, F2R, FERMT2, FLCN, FLNA, FLOT1, GDAP1, GET4, GFER, …
GO:0034641	cellular nitrogen compound metabolic process	936	14.8713	0.0311813	[AATF, ABCA1, ABCA2, ABHD14B, ABLIM1, ABLIM2, ACAP3, ACD, ACOT7, ACVR2A, ADC, ADCY1, ADCY2, ADCY6, ADK, ADM, ADRM1, AEBP1, AES, AGAP3, AGO1, AGO2, AGRN, AHSA1, AIMP2, AK4, AK5, AKAP12, AKAP17A, AKAP5, AKAP6, ALDOA, ALK, AMH, AMOT, ANP32A, AP5Z1, APAF1, APEX2, APOC1, APOE, APRT, ARF1, ARFGAP1, ARHGAP24, ARHGAP6, ARHGEF1, ARHGEF10L, ARHGEF16, ARHGEF17, ARHGEF18, ARHGEF19, ARID3A, ARID5A, ARL2, ARL8…
GO:0034645	cellular macromolecule biosynthetic process	692	15.1854	0.0152656	[AATF, ABCA1, ABCA2, ABHD14B, ABLIM1, ABLIM2, ACD, ACVR2A, ADRM1, AEBP1, AES, AGO1, AGO2, AGRN, AIMP2, AKAP17A, ALG10, ALG12, ALG3, ALK, AMH, ANP32A, APOE, ARHGEF10L, ARID3A, ARID5A, ARMCX3, ARRB2, ARX, ASCC2, ASCC3, ASPH, ATF5, ATN1, ATOH8, ATP7A, ATRX, AXIN1, B3GALT5, B3GALT6, B3GAT3, B4GALT2, BAHD1, BAMBI, BANP, BAZ2B, BCL2L12, BCL3, BCL9L, BEX1, BEX2, BLOC1S2, BMP5, BRF1, BRMS1, BTG1, C14orf1…
GO:0034654	nucleobase-containing compound biosynthetic process	596	15.0963	0.0381903	[AATF, ABCA1, ABCA2, ABHD14B, ABLIM1, ABLIM2, ACOT7, ACVR2A, ADCY1, ADCY2, ADCY6, ADK, ADM, ADRM1, AEBP1, AES, AGO1, AGO2, AGRN, AK4, AK5, AKAP12, AKAP17A, AKAP5, AKAP6, ALDOA, ALK, AMH, ANP32A, APOE, APRT, ARHGEF10L, ARID3A, ARID5A, ARMCX3, ARRB2, ARX, ASCC2, ASCC3, ASPH, ATF5, ATIC, ATN1, ATOH8, ATP5D, ATRX, AURKAIP1, AXIN1, BAHD1, BAMBI, BANP, BAZ2B, BCL2L12, BCL3, BCL9L, BEX1, BEX2, BLOC1S2, …
GO:0034655	nucleobase-containing compound catabolic process	181	16.6513	0.0110883	[ABCA2, ACAP3, AGAP3, AGO1, AGO2, AGRN, AHSA1, AMOT, APAF1, ARF1, ARFGAP1, ARHGAP24, ARHGAP6, ARHGEF1, ARHGEF10L, ARHGEF16, ARHGEF17, ARHGEF18, ARHGEF19, ARL2, ARL8A, ARRB2, ATP5D, AXIN1, BAX, BVES, CDKL5, CDKN2A, CHD8, CHN1, CHN2, CNOT3, CNOT6, CPEB2, DCTPP1, DDX17, DDX39B, DDX54, DENND3, DENND4A, DENND4B, DENND5B, DHX34, DLC1, DNAJB6, DNASE2, DNM2, DNM3, DNPH1, EDC4, ENPP3, ENPP4, EPHA2, EPHB3,…
GO:0034762	regulation of transmembrane transport	35	20.9581	0.0109998	[ACTN2, ACTN4, AKAP6, ANK3, ASPH, ATP2B4, CACNB4, CACNG8, CFH, CNIH2, FGF12, GJA5, GPD1L, GSTM2, JPH4, KCNH2, KCNIP2, KCNJ2, LLGL1, MYO5A, NANOS1, NEDD4L, NLGN3, PDGFB, PLA2G6, PRKCA, SCN3B, SHANK3, SLC30A1, SLC9A3R1, TIMP1, TRPV3, TWIST1, UTRN, WWP2]
GO:0034765	regulation of ion transmembrane transport	34	21.6561	0.00731233	[ACTN2, ACTN4, AKAP6, ANK3, ASPH, ATP2B4, CACNB4, CACNG8, CFH, CNIH2, FGF12, GJA5, GPD1L, GSTM2, JPH4, KCNH2, KCNIP2, KCNJ2, LLGL1, MYO5A, NANOS1, NEDD4L, NLGN3, PDGFB, PLA2G6, PRKCA, SCN3B, SHANK3, SLC30A1, SLC9A3R1, TIMP1, TRPV3, UTRN, WWP2]
GO:0035020	regulation of Rac protein signal transduction	10	26.3158	0.0359802	[ARHGAP24, BVES, CHN1, EPHB3, MLST8, NTRK2, OCRL, OGT, SPATA13, STMN3]
GO:0035023	regulation of Rho protein signal transduction	35	22.5806	0.00326703	[ABCA1, AGRN, APOE, ARHGAP24, ARHGEF1, ARHGEF10L, ARHGEF16, ARHGEF19, BVES, CDKL5, CHN1, DLC1, EPHA2, EPHB3, F2R, F2RL1, FGD3, FLCN, FLOT1, GPR56, KANK1, LPAR1, MLST8, NDEL1, NTRK2, OCRL, PIN1, RHOG, SFRP1, SPATA13, SRGAP3, STMN3, SYDE1, TAX1BP3, TNFAIP1]
GO:0035065	regulation of histone acetylation	9	27.2727	0.0367556	[ARID5A, CTBP1, FLCN, MAPK3, NANOS1, NOC2L, RPS6KA4, SNCA, TWIST1]
GO:0035107	appendage morphogenesis	29	19.863	0.0372657	[ACD, ASPH, BAX, CRABP2, DICER1, ECE1, FBN2, FLVCR1, GJA5, GLI2, LRP6, MEGF8, MYH3, NOTCH2, OSR2, PCNT, PLXNA2, RARB, RARG, SALL1, SEMA3C, SMARCA4, SOX11, SOX9, TWIST1, WNT3, WNT5A, WNT9A, ZNF358]
GO:0035108	limb morphogenesis	29	19.863	0.0372657	[ACD, ASPH, BAX, CRABP2, DICER1, ECE1, FBN2, FLVCR1, GJA5, GLI2, LRP6, MEGF8, MYH3, NOTCH2, OSR2, PCNT, PLXNA2, RARB, RARG, SALL1, SEMA3C, SMARCA4, SOX11, SOX9, TWIST1, WNT3, WNT5A, WNT9A, ZNF358]
GO:0035278	negative regulation of translation involved in gene silencing by miRNA	4	44.4444	0.0283893	[AGO1, AGO2, RBM4, ZFP36]
GO:0035356	cellular triglyceride homeostasis	3	60	0.022992	[C1QTNF3, FITM2, SLC25A27]
GO:0035556	intracellular signal transduction	419	17.7995	8.988287376171442E-8	[A2M, ABCA1, ACAP3, ACKR3, ADC, ADCY1, ADCY2, ADCY6, ADM, AGAP3, AGO1, AGO2, AGRN, AGTR1, AKAP12, AKAP5, AKAP6, ALK, AMH, AMOT, ANKRD6, ANP32A, APAF1, APC, APOE, ARF1, ARFGAP1, ARHGAP19, ARHGAP23, ARHGAP24, ARHGAP33, ARHGAP39, ARHGAP4, ARHGAP44, ARHGAP6, ARHGDIA, ARHGEF1, ARHGEF10L, ARHGEF16, ARHGEF17, ARHGEF18, ARHGEF19, ARL10, ARL15, ARL2, ARL5B, ARL8A, ARRB2, ASPH, AURKAIP1, AXIN1, BAD, BAX, B…
GO:0035567	non-canonical Wnt signaling pathway	12	28.5714	0.0118635	[ANKRD6, DVL1, DVL3, FZD4, IFT80, LRP6, MAGI2, MLLT3, RORA, SFRP1, WNT5A, ZNRF3]
GO:0035725	sodium ion transmembrane transport	24	25.5319	0.0026298	[ACTN4, ANK3, ASIC3, ATP1B1, ATP1B3, ATP2B4, FGF12, GPD1L, HCN1, NANOS1, NEDD4L, SCN11A, SCN1A, SCN2A, SCN3A, SCN3B, SHROOM2, SLC20A2, SLC4A4, SLC4A5, SLC8A1, SLC9A3R1, SLC9A5, UTRN]
GO:0035855	megakaryocyte development	4	40	0.0420875	[KIT, SRF, ZFPM1, ZNF385A]
GO:0035986	senescence-associated heterochromatin focus assembly	3	100	0.00287788	[CDKN2A, HMGA1, HMGA2]
GO:0036211	protein modification process	436	15.4118	0.0256944	[ABCA1, ACD, ACSL1, ACVR2A, ADCY1, ADCY2, ADCY6, ADRBK1, AIMP2, ALG10, ALG12, ALG3, ALK, AMH, ANAPC11, APC, APOE, ARFGAP1, ARID5A, ARRB2, ARSA, ARSI, ARSJ, ASPH, ATP2B4, ATP6V0D1, ATP7A, AXIN1, B3GALT5, B3GALT6, B3GAT3, B4GALT2, BAX, BMP5, BRMS1, BRSK1, C14orf169, CACTIN, CAPN3, CARD10, CARM1, CBS, CBX4, CCNB3, CCND3, CDC14B, CDC25B, CDC37, CDK6, CDK9, CDKL5, CDKN1C, CDKN2A, CDKN2C, CIB1, CISH, C…
GO:0036314	response to sterol	7	29.1667	0.0446612	[ABCA1, APOE, LRP6, LRP8, MLC1, RORA, SMOX]
GO:0036315	cellular response to sterol	7	41.1765	0.00614278	[ABCA1, APOE, LRP6, LRP8, MLC1, RORA, SMOX]
GO:0036342	post-anal tail morphogenesis	6	31.5789	0.0428696	[AXIN1, EPHA2, FZD3, FZD9, LRP6, WNT5A]
GO:0036344	platelet morphogenesis	7	50	0.00160046	[CIB1, MFAP2, MYH9, NBEAL2, SRF, ZFPM1, ZNF385A]
GO:0038032	termination of G-protein coupled receptor signaling pathway	11	27.5	0.0208471	[ADRBK1, ADRBK2, ARHGEF1, AXIN1, GRK6, MYH9, RGS10, RGS14, RGS19, RGS5, RGS8]
GO:0038034	signal transduction in absence of ligand	19	21.1111	0.0477949	[BAD, BAG3, BAX, BOK, CFLAR, DAPK3, EYA1, FASN, JAK3, KIAA1324, KITLG, MAPK7, MCL1, MKNK2, PPP1CA, PPP2R1A, TERT, TRAF2, UNC5B]
GO:0038127	ERBB signaling pathway	46	19.0871	0.0216369	[ADAM12, ADCY1, ADCY2, ADCY6, ADRBK1, AGO1, AGO2, AP2A1, AP2S1, BAD, BCAR1, CLTA, EPN1, FBXW7, FGFR4, HGS, IRS1, ITPR3, KIT, KITLG, MAP2K2, MAPK3, MDM2, MLST8, NCK2, NR4A1, NUP62, PAG1, PAK3, PDE1A, PDGFB, PIK3R2, PRKAR1A, PRKAR1B, PRKCA, PRKCD, PTEN, PXDN, RHBDF1, SHC3, SOX9, SPRY1, STAM2, THEM4, TNRC6B, ZGPAT]
GO:0038179	neurotrophin signaling pathway	69	23.0769	2.3595861848472282E-5	[AATF, ADCY1, ADCY2, ADCY6, ADRBK1, AGO1, AGO2, AP2A1, AP2S1, ARHGAP4, ARHGDIA, ARHGEF1, ARHGEF16, ARHGEF17, ARHGEF18, BAD, BCAR1, CLTA, DNAL4, DUSP6, DUSP7, ELK1, FGD3, FGFR4, FURIN, IRS1, ITGB3BP, ITPR3, KALRN, KCNH8, KIT, KITLG, MAGI2, MAP2K2, MAPK3, MAPK7, MDM2, MLST8, MYD88, NFKB1, NFKBIA, NR4A1, NTRK2, OBSCN, PAK3, PCSK6, PDE1A, PDGFB, PIK3R2, PRKAR1A, PRKAR1B, PRKCA, PRKCD, PTEN, RAPGEF1, …
GO:0038180	nerve growth factor signaling pathway	4	57.1429	0.00998895	[MAGI2, RAPGEF1, RAPGEF2, SORT1]
GO:0039530	MDA-5 signaling pathway	3	50	0.0411606	[C1QBP, DDX60, IRF7]
GO:0040012	regulation of locomotion	112	19.3772	3.1785659841633844E-4	[ABHD6, AMOT, APC, APOE, ARHGAP4, BCAR1, BMP5, BVES, C1QBP, CDK6, CIB1, CNN2, CNOT6, COL18A1, CORO1A, CSF1, CTSH, DAPK3, DLC1, EDN1, EGFL7, EPHA2, F2R, F2RL1, FLCN, GCNT2, GLIPR2, GNA13, GPR56, HAS2, HDAC7, HS3ST5, HSPB1, HYAL2, IFITM1, IFITM2, IGFBP5, INSR, IRS1, ITGA5, ITGB3, KANK1, KIT, LAMA4, LAMA5, LPAR1, LRRC16A, LRRK2, MAGI2, MAP2K2, MEGF8, MEN1, MPP1, MYADM, MYO1C, NBL1, NELL1, NELL2, NEX…
GO:0040013	negative regulation of locomotion	39	21.0811	0.00687894	[ABHD6, APOE, ARHGAP4, BMP5, CNN2, DLC1, EGFL7, FLCN, GPR56, HYAL2, IFITM1, IFITM2, IGFBP5, KANK1, MAGI2, NBL1, NELL1, NF2, PDGFB, PIN1, PODN, PTEN, RAP2B, RRAS, RYK, SEMA3A, SEMA3F, SFRP1, SLC9A3R1, SLIT1, SLIT3, SRF, SRGAP3, SULF1, TIMP1, TP53INP1, TPM1, WNT3, WNT5A]
GO:0040023	establishment of nucleus localization	4	40	0.0420875	[MYH10, NTN1, SLIT1, SLIT3]
GO:0040033	negative regulation of translation, ncRNA-mediated	4	44.4444	0.0283893	[AGO1, AGO2, RBM4, ZFP36]
GO:0042060	wound healing	116	16.6189	0.0384479	[A2M, ACTB, ACTN1, ACTN2, ACTN4, AK4, AKAP1, ALDOA, ANXA5, APOE, ARHGAP24, ARHGEF19, ARRB2, ATP1B1, ATP1B3, ATP2B4, BCAR1, BSG, C1QBP, CAPN3, CAPZA2, CBX5, CD109, CFLAR, CLU, CNN2, COL5A1, CORO1B, DAGLA, DDR1, DEAF1, DGKQ, DGKZ, DYSF, EDN1, EFEMP2, EHD1, EHD2, ENPP4, F11R, F2R, F2RL1, F8, FLNA, GLG1, GNA11, GNA13, GNAI2, GNG2, GP1BB, GPX1, GRB14, GUCY1B3, HMG20B, HPS6, ITGA5, ITGB3, ITPK1, ITPR3,…
GO:0042136	neurotransmitter biosynthetic process	6	31.5789	0.0428696	[COMT, DAGLA, GAD1, MAOA, NANOS1, SH2D3C]
GO:0042176	regulation of protein catabolic process	46	24.2105	1.59873277101269E-4	[APC, APOE, AXIN1, BANP, CLU, CST3, DEDD, DISC1, DVL1, EGLN2, FBXO43, FBXW7, FLNA, FURIN, GGA1, GIPC1, GPX1, HGS, HSPBP1, IER3, LRRK2, MAPK15, MDM2, MDM4, MYLIP, NDFIP1, NEDD4L, NELL1, PKD1, PLK2, PML, PRKCA, PSMF1, PTEN, RAD23A, RELA, RHBDF1, SENP1, SGSM3, SOX9, STUB1, TIMP1, TIMP3, TNFAIP3, WNT5A, ZNF268]
GO:0042177	negative regulation of protein catabolic process	14	28.5714	0.00684957	[BANP, CST3, DEDD, FBXO43, FLNA, FURIN, GIPC1, MDM4, NELL1, PSMF1, RELA, SENP1, TIMP1, TIMP3]
GO:0042178	xenobiotic catabolic process	4	40	0.0420875	[ACSL1, CRYZ, GSTM2, GSTM3]
GO:0042278	purine nucleoside metabolic process	135	17.0025	0.0138068	[ABCA2, ACAP3, ACOT7, ADK, AGAP3, AGRN, AK4, AK5, ALDOA, AMOT, APRT, ARF1, ARFGAP1, ARHGAP24, ARHGAP6, ARHGEF1, ARHGEF10L, ARHGEF16, ARHGEF17, ARHGEF18, ARHGEF19, ARL2, ARL8A, ARRB2, ATP5D, ATP6V1A, AXIN1, BAD, BVES, CDKL5, CHD8, CHN1, CHN2, COASY, CPEB2, DCAKD, DDX17, DDX39B, DDX54, DENND3, DENND4A, DENND4B, DENND5B, DLC1, DNM2, DNM3, ENPP4, EPHA2, EPHB3, FGD3, FLCN, GIT1, GNAO1, GNG11, GNG5, GN…
GO:0042297	vocal learning	3	60	0.022992	[NRXN2, SHANK3, STRA6]
GO:0042308	negative regulation of protein import into nucleus	14	22.9508	0.0446604	[C1QTNF3, EMD, LITAF, MAPK7, MDFI, NFKBIA, NFKBIE, NFKBIL1, PKD1, PKIA, TONSL, TRIP6, UACA, ZNF268]
GO:0042325	regulation of phosphorylation	185	16.129	0.0322551	[ACD, ACKR3, ACSL1, ACVR2A, ADCY1, ADCY2, ADCY6, ALK, AMH, ANKRD6, APC, APLN, APOE, ARFGAP1, ARRB2, ATP6V0D1, ATP7A, AXIN1, BAD, BAX, BMP5, CACTIN, CARD10, CBS, CCNB3, CCND3, CDC25B, CDC37, CDKN1C, CDKN2A, CDKN2C, CIB1, CNKSR3, CSF1, CXXC1, DAB1, DCC, DUSP16, DUSP26, DUSP5, DUSP6, DUSP7, DUSP8, DVL1, DVL3, EDN1, EIF2S1, EPHA2, EPHA7, F2R, F2RL1, FAM129A, FAM58A, FBXW7, FECH, FGFR4, FLCN, FZD4, GC…
GO:0042326	negative regulation of phosphorylation	68	23.0508	2.800276069375367E-5	[APC, APOE, BAX, CACTIN, CDKN1C, CDKN2A, CDKN2C, CIB1, CNKSR3, DUSP16, DUSP26, DUSP5, DUSP6, DUSP7, DUSP8, DVL1, F2RL1, FAM129A, FLCN, GMFB, GPD1L, GPS1, GSTP1, HEXIM1, HSPB1, HYAL2, IGBP1, KAT2B, LATS1, LRP6, MAPK8IP1, MEN1, MICAL1, MLLT1, MYADM, NF2, NUP62, PAK3, PDCD4, PIN1, PKIA, PPAP2B, PPM1F, PPP2R1A, PRKAG2, PRKAR1A, PRKAR1B, PRKCA, PRKCD, PRR5L, PTEN, RB1, RGS14, RPS6KA6, SFRP1, SH3BP5, S…
GO:0042330	taxis	121	17.768	0.00492182	[ABLIM1, ABLIM2, ACKR3, ACTB, ACTG1, AGRN, AGTR1, AMH, AMOT, ANK3, AP2A1, AP2S1, ARHGAP39, ARHGEF16, ARRB2, ARX, BCAR1, C1QBP, CACNB2, CACNB4, CHN1, CLTA, CMTM1, CMTM3, CNOT6, COL5A1, COL9A1, CORO1A, CORO1B, CXXC1, DCC, DEAF1, DHX34, DPYSL5, DVL1, EDN1, EFNA2, ENC1, EPHA2, EPHA7, EPHB2, EPHB3, ETV1, F2RL1, FZD3, FZD9, GLI2, HSPB1, ITGA5, ITGB3, KIAA1598, KIT, LIMK1, LLGL1, LMNB2, LPAR1, MAP2K2, M…
GO:0042347	negative regulation of NF-kappaB import into nucleus	6	31.5789	0.0428696	[C1QTNF3, LITAF, NFKBIA, TRIP6, UACA, ZNF268]
GO:0042391	regulation of membrane potential	63	17.4033	0.0499777	[ACSBG1, ACTN2, AKAP6, ANK3, BAD, BAX, CACNA1B, CACNB4, CFH, CHRNB1, CLN3, CNIH2, CNR1, DICER1, EDN1, EPB41L3, EYA1, FAM3A, FGF12, GJA5, GNA11, GPD1L, GRIK5, HCN1, ID4, JUP, KCND3, KCNH2, KCNH8, KCNIP2, KCNJ10, KCNJ2, LLGL1, LPAR1, LRRK2, MKL1, MPP5, MYO5A, NEDD4L, NLGN3, PANK2, PIEZO1, PIEZO2, PLP1, PRELID1, PTEN, RARB, RARG, RIMS3, S1PR2, SCN1A, SCN2A, SCN3B, SERINC5, SHANK3, SLC25A27, SNCA, TE…
GO:0042439	ethanolamine-containing compound metabolic process	19	21.3483	0.0432591	[APOC1, CLN3, FABP5, MBOAT1, PCYT1B, PEMT, PLA2G12A, PLA2G15, PLA2G3, PLA2G4A, PLA2G6, PLB1, PNPLA6, PRKCD, SCARB1, SH2D3C, SMPD1, SMPD2, SPTLC2]
GO:0042440	pigment metabolic process	16	24.2424	0.0206001	[AP3D1, APRT, BDH2, BLVRA, COASY, DDT, FECH, IBA57, MYO5A, PMEL, PPAT, PRTFDC1, RAPGEF2, SLC25A39, SOX2, TSPO]
GO:0042454	ribonucleoside catabolic process	115	16.9367	0.0241479	[ABCA2, ACAP3, AGAP3, AGRN, AMOT, ARF1, ARFGAP1, ARHGAP24, ARHGAP6, ARHGEF1, ARHGEF10L, ARHGEF16, ARHGEF17, ARHGEF18, ARHGEF19, ARL2, ARL8A, ARRB2, ATP5D, AXIN1, BVES, CDKL5, CHD8, CHN1, CHN2, CPEB2, DDX17, DDX39B, DDX54, DENND3, DENND4A, DENND4B, DENND5B, DLC1, DNM2, DNM3, ENPP4, EPHA2, EPHB3, FGD3, GIT1, GNAO1, GNG11, GNG5, GNL3, KALRN, KATNB1, LLGL1, LRRK2, MLST8, MNAT1, MTG1, MYH10, MYH3, MYH…
GO:0042471	ear morphogenesis	27	21.7742	0.0145312	[ATP2B4, COL11A1, DVL1, DVL3, EDN1, EPHB2, EYA1, EYA4, FZD3, FZD9, GLI2, INSIG2, MYO7A, NAGLU, NKX3-2, NTN1, OSR2, OTX1, POU3F4, RORA, SALL1, SMOX, SOX2, SOX9, TWIST1, WNT5A, ZIC1]
GO:0042474	middle ear morphogenesis	7	29.1667	0.0446612	[EDN1, EYA1, EYA4, INSIG2, NAGLU, NKX3-2, OSR2]
GO:0042551	neuron maturation	10	29.4118	0.0169305	[AGRN, CDKN1C, CNTNAP2, KCNIP2, LRRK2, NTN4, PICK1, RB1, RND1, SCARF1]
GO:0042981	regulation of apoptotic process	232	17.5227	2.700977371804189E-4	[AATF, ACKR3, ACTN1, ACTN2, ACTN4, ADAMTSL4, ADM, AES, AGRN, ALK, AMH, ANXA5, APAF1, APC, APOE, ARHGAP4, ARHGDIA, ARHGEF16, ARHGEF17, ARHGEF18, ARRB2, ATAD3A, ATF5, ATP7A, BAD, BAG3, BAX, BCAR1, BCL2L12, BCL2L13, BCL2L14, BCL3, BEX1, BEX2, BID, BMP5, BOK, BRMS1, BTG1, C1QBP, CAPN10, CAPN3, CARD10, CARD8, CBS, CBX4, CD248, CDKN2A, CFLAR, CHD8, CHERP, CIB1, CLN3, CLU, CNR1, CNTFR, COL18A1, CRADD, C…
GO:0042990	regulation of transcription factor import into nucleus	18	23.3766	0.021017	[AKAP6, BCL3, C1QTNF3, CHERP, FLNA, LITAF, MAPK7, MDFI, NFKBIA, NFKBIE, NFKBIL1, PKD1, RBCK1, TLR9, TONSL, TRIP6, UACA, ZNF268]
GO:0042991	transcription factor import into nucleus	18	23.0769	0.0238003	[AKAP6, BCL3, C1QTNF3, CHERP, FLNA, LITAF, MAPK7, MDFI, NFKBIA, NFKBIE, NFKBIL1, PKD1, RBCK1, TLR9, TONSL, TRIP6, UACA, ZNF268]
GO:0042992	negative regulation of transcription factor import into nucleus	12	30	0.00785694	[C1QTNF3, LITAF, MAPK7, MDFI, NFKBIA, NFKBIE, NFKBIL1, PKD1, TONSL, TRIP6, UACA, ZNF268]
GO:0042994	cytoplasmic sequestering of transcription factor	8	33.3333	0.0146387	[MDFI, NFKBIA, NFKBIE, NFKBIL1, PKD1, TONSL, TRIP6, ZNF268]
GO:0043029	T cell homeostasis	9	26.4706	0.0438927	[BAX, CHST3, CORO1A, FASN, JAK3, RAG1, SIVA1, STAT5A, TSC22D3]
GO:0043030	regulation of macrophage activation	9	32.1429	0.0126743	[AMH, IL4R, MIF, RORA, SLC7A2, SNCA, TNIP2, WNT5A, ZC3H12A]
GO:0043062	extracellular structure organization	79	20.6266	3.473952821352655E-4	[A2M, ACTN1, ADAMTS4, ADAMTSL4, AGRN, ATP7A, BCL3, BSG, CCDC80, CD151, CIB1, COL11A1, COL18A1, COL23A1, COL26A1, COL27A1, COL5A1, COL9A1, COLGALT1, CRISPLD2, CRTAP, CSGALNACT1, CST3, CTSD, CTSL, CTSV, CXXC1, DDR1, DNAJB6, EFEMP2, EMILIN1, F11R, FBN1, FBN2, FGFR4, FURIN, GPM6B, HAS2, HSD17B12, HSPG2, ICAM3, ITGA5, ITGB3, ITGB5, LAMA4, LAMA5, LEPREL2, LMNB2, LOXL2, LTBP3, LTBP4, MFAP2, MFAP3, MMP11…
GO:0043065	positive regulation of apoptotic process	82	20.7071	2.377866917069476E-4	[AATF, ADAMTSL4, ADM, AES, AGRN, APAF1, APC, ARHGAP4, ARHGEF16, ARHGEF17, ARHGEF18, ARRB2, BAD, BAX, BID, BOK, BRMS1, BTG1, C1QBP, CAPN10, CD248, CDKN2A, CLU, CNR1, COL18A1, DCC, DHODH, DNM2, DUSP6, EPHA7, FASN, FGD3, FLCN, GAL, GRIK5, HMGA2, ID3, IFIT2, ITGB3BP, JAK3, JMY, KALRN, KLF11, LPAR1, LRP6, MAP2K7, MAP3K11, MAP3K9, MEN1, NOTCH2, NOX4, NR4A1, OBSCN, PDCD5, PIAS4, PIDD, PML, PRELID1, PTEN…
GO:0043067	regulation of programmed cell death	236	17.6251	1.663637435546249E-4	[AATF, ACKR3, ACTN1, ACTN2, ACTN4, ADAMTSL4, ADM, AES, AGRN, ALK, AMH, ANXA5, APAF1, APC, APOE, ARHGAP4, ARHGDIA, ARHGEF16, ARHGEF17, ARHGEF18, ARRB2, ATAD3A, ATF5, ATP7A, BAD, BAG3, BAX, BCAR1, BCL2L12, BCL2L13, BCL2L14, BCL3, BEX1, BEX2, BID, BMP5, BOK, BRMS1, BTG1, C1QBP, CAPN10, CAPN3, CARD10, CARD8, CBS, CBX4, CD248, CDKN2A, CFLAR, CHD8, CHERP, CIB1, CLN3, CLU, CNR1, CNTFR, COL18A1, CRADD, C…
GO:0043068	positive regulation of programmed cell death	85	21.0396	1.0500825557830061E-4	[AATF, ADAMTSL4, ADM, AES, AGRN, APAF1, APC, ARHGAP4, ARHGEF16, ARHGEF17, ARHGEF18, ARRB2, BAD, BAX, BID, BOK, BRMS1, BTG1, C1QBP, CAPN10, CD248, CDKN2A, CLU, CNR1, COL18A1, DCC, DHODH, DNM2, DUSP6, EPHA7, FASN, FGD3, FLCN, GAL, GRIK5, HMGA2, ID3, IFIT2, ITGB3BP, JAK3, JMY, KALRN, KLF11, LPAR1, LRP6, LRRK2, MAP2K7, MAP3K11, MAP3K9, MARK4, MEN1, NOTCH2, NOX4, NR4A1, OBSCN, PAK3, PDCD5, PIAS4, PIDD…
GO:0043085	positive regulation of catalytic activity	172	16.3966	0.0223658	[ACD, ACSL1, ADCY1, ADCY2, ADCY6, ADRBK1, ADRM1, AGRN, AGTR1, AHSA1, AKAP6, ALK, AMH, ANAPC11, APAF1, APOC1, APOE, ARFGAP1, ARHGAP24, ARHGAP6, ARHGEF10L, ARHGEF16, ARHGEF19, ASPH, ATP6V0D1, ATP7A, AXIN1, BAD, BAX, BCL2L13, BID, BOK, CARD10, CARD8, CCND3, CDC14B, CDC25B, CDKL5, CDKN2A, CFLAR, CHN2, CIB1, CRADD, CSF1, CTSH, CXXC1, DAB1, DLC1, DNAJB6, DVL3, EDN1, EGLN3, EIF2S1, EPHA2, F2R, FASN, FBX…
GO:0043086	negative regulation of catalytic activity	113	16.7905	0.0315131	[A2M, AMOT, ANAPC11, ANXA5, APBA3, APC, APOC1, APOE, ARL2, ARRB2, ATP7A, AURKAIP1, BCL2L12, CASC5, CDKN1C, CDKN2A, CDKN2C, CLN3, CNR1, CPEB2, CST3, DLC1, DLG2, DNAJB6, DUSP16, DUSP26, DUSP5, DUSP6, DUSP7, DUSP8, DVL1, ELFN1, FURIN, GMFB, GNAI2, GPI, GPS1, GPX1, GRM3, GSTP1, HEXIM1, HSPB1, HSPBP1, HYAL2, IFIT1, IGBP1, INTS1, ITIH4, KAT2B, LATS1, LIMK1, LRP6, LRRK2, MAPK7, MAPK8IP1, MDM2, MEN1, MIC…
GO:0043087	regulation of GTPase activity	67	18.4573	0.014079	[ACAP3, AGAP3, AGRN, AMOT, ARFGAP1, ARHGAP24, ARHGAP6, ARHGEF1, ARHGEF10L, ARHGEF16, ARHGEF17, ARHGEF18, ARHGEF19, ARL2, ARRB2, AXIN1, BVES, CDKL5, CHN1, CHN2, CPEB2, DENND3, DENND4A, DENND4B, DENND5B, DLC1, EPHA2, EPHB3, FGD3, GIT1, GNAO1, KALRN, LLGL1, LRRK2, MLST8, NDEL1, NTRK2, OCRL, PGAM5, PIN1, PTGES2, RAB3GAP1, RALGAPA1, RALGAPA2, RAPGEF1, RAPGEF2, RGS10, RGS14, RGS19, RGS5, RGS8, RHOG, RI…
GO:0043113	receptor clustering	9	29.0323	0.0249452	[AGRN, DVL1, FLNA, GRIK5, LLGL1, MAGI2, PICK1, SHANK3, SMOX]
GO:0043122	regulation of I-kappaB kinase/NF-kappaB signaling	45	21.028	0.00411137	[BCL3, C1QTNF3, CANT1, CAPN3, CARD8, CC2D1A, CFLAR, CTH, F2R, F2RL1, FLNA, GSTP1, HSPB1, LITAF, LPAR1, MALT1, MAP3K14, MYD88, NDFIP1, NFKBIA, NLRX1, NUP62, PELI2, PLK2, RBCK1, RELA, RNF31, RORA, SHARPIN, SHISA5, TICAM1, TLR9, TNFAIP3, TNFRSF19, TNIP1, TNIP2, TRAF3IP2, TRIM22, TRIM59, TRIM62, TRIM8, TRIP6, UACA, VAPA, ZNF268]
GO:0043123	positive regulation of I-kappaB kinase/NF-kappaB signaling	30	19.3548	0.046907	[CANT1, CC2D1A, CFLAR, CTH, F2R, F2RL1, FLNA, LITAF, LPAR1, MALT1, MAP3K14, MYD88, NDFIP1, NUP62, PELI2, PLK2, RBCK1, RELA, RNF31, SHARPIN, SHISA5, TICAM1, TLR9, TNFRSF19, TNIP2, TRAF3IP2, TRIM22, TRIM62, TRIM8, VAPA]
GO:0043124	negative regulation of I-kappaB kinase/NF-kappaB signaling	10	25.641	0.0424303	[CARD8, GSTP1, NFKBIA, NLRX1, RORA, TNFAIP3, TNIP1, TRIM59, TRIP6, ZNF268]
GO:0043149	stress fiber assembly	15	23.8095	0.0285332	[AMOT, ARHGAP6, ARHGEF10L, DLC1, FHOD1, LRRC16A, NF2, NOX4, PFN1, PPM1F, SFRP1, SORBS3, SRF, TNFAIP1, TPM1]
GO:0043162	ubiquitin-dependent protein catabolic process via the multivesicular body sorting pathway	5	41.6667	0.0192712	[NDFIP1, NEDD4L, PTPN23, TOM1L1, VPS28]
GO:0043173	nucleotide salvage	6	42.8571	0.00887983	[ADK, APRT, NAPRT1, PRTFDC1, UCK2, UCKL1]
GO:0043242	negative regulation of protein complex disassembly	13	23.2143	0.0477524	[ADD2, APC, CAPZA2, CIB1, GAS2L1, KATNB1, LRRC16A, MID1IP1, PLEKHH2, SHROOM2, SPTBN2, TRIOBP, TWF2]
GO:0043268	positive regulation of potassium ion transport	6	33.3333	0.0332155	[ACTN2, AKAP6, CFH, HBP1, KCNH2, KCNJ2]
GO:0043269	regulation of ion transport	65	17.7596	0.0327534	[ACSL4, ACTN2, ACTN4, AKAP6, AMH, ANK3, ARRB2, ASPH, ATP2B4, BAX, CACNA1B, CACNB2, CACNB4, CACNG8, CAPN3, CFH, CNIH2, CNKSR3, CNR1, F2R, FGF12, FGF14, GJA5, GNAI2, GNAO1, GPD1L, GPM6B, GSTM2, HBP1, JPH4, KCNH2, KCNIP2, KCNJ2, LLGL1, MIF, MYO5A, NANOS1, NEDD4L, NLGN3, NOS3, PDGFB, PLA2G6, PLA2R1, PML, PRELID1, PRKCA, PRKCD, RAB11B, REPIN1, SCN3B, SHANK3, SIK1, SLC30A1, SLC8A1, SLC9A3R1, SNCA, TIMP…
GO:0043270	positive regulation of ion transport	32	21.1921	0.0124305	[ACTN2, AKAP6, AMH, ANK3, ARRB2, ASPH, ATP2B4, BAX, CACNB2, CAPN3, CFH, CNKSR3, F2R, FGF12, FGF14, GPD1L, HBP1, KCNH2, KCNJ2, MIF, NANOS1, NEDD4L, PDGFB, PLA2G6, PLA2R1, PRELID1, SCN3B, SNCA, TRPC3, TRPV3, TSPO, WFS1]
GO:0043280	positive regulation of cysteine-type endopeptidase activity involved in apoptotic process	25	21.5517	0.0205306	[APAF1, BAD, BAX, BCL2L13, BID, BOK, CARD8, CDKN2A, CRADD, DLC1, EGLN3, F2R, FASN, IFI27, MEN1, NLRP1, PIDD, PML, PPM1F, PRELID1, RPS27L, SENP1, SNCA, TRAF2, UACA]
GO:0043281	regulation of cysteine-type endopeptidase activity involved in apoptotic process	41	20.8122	0.00715027	[APAF1, BAD, BAX, BCL2L12, BCL2L13, BID, BOK, CARD8, CDKN2A, CRADD, DLC1, DNAJB6, EGLN3, EPHA7, F2R, FASN, GPI, GPX1, IFI27, IGBP1, INTS1, MDM2, MEN1, MICAL1, MKL1, NLRP1, NR4A1, PIDD, PML, PPM1F, PRELID1, RAG1, RPS27L, SENP1, SERPINB9, SNCA, SOX2, TPD52L1, TRAF2, UACA, WNT9A]
GO:0043297	apical junction assembly	14	24.1379	0.0301743	[ACTN4, APC, ARL2, F11R, FBF1, FRMPD2, MICALL2, MPP5, MPP7, MYO1C, NEDD4L, PARD6A, PRKCA, SRF]
GO:0043393	regulation of protein binding	28	22.7642	0.00706988	[ADD2, AES, ARRB2, BAMBI, BAX, CARM1, DVL1, IFIT1, IFIT2, LDLRAP1, MAPK3, MEN1, MMAB, NELL1, PCBD1, PEX14, PKD1, PRKCA, PRKCD, PRMT7, RAPGEF2, RFNG, TDG, TEX14, TICAM1, TRAF2, ZFPM1, ZNF268]
GO:0043405	regulation of MAP kinase activity	53	18.9286	0.0169917	[ALK, AMH, APOE, AXIN1, CBS, DUSP16, DUSP5, DUSP6, DUSP7, DUSP8, DVL3, EDN1, FZD4, GPS1, GSTP1, HYAL2, INSR, KIT, KITLG, LPAR1, LRRK2, MAP2K2, MAP2K7, MAP3K11, MAP3K6, MAP3K9, MAP4K1, MAPK3, MAPK8IP1, MAPK8IP3, MDFI, MIF, MUC20, NOX4, NUP62, PAK3, PDCD4, PDGFB, PPP2R1A, PRKCA, PRKCD, PXDN, RGS14, S1PR2, SFRP1, SMPD1, SPRY1, STK38, TLR9, TPD52L1, TRAF2, WNT5A, ZNF675]
GO:0043407	negative regulation of MAP kinase activity	21	30.4348	4.186440194090634E-4	[APOE, DUSP16, DUSP5, DUSP6, DUSP7, DUSP8, GPS1, GSTP1, HYAL2, MAPK8IP1, NUP62, PDCD4, PPP2R1A, PRKCA, PRKCD, RGS14, SFRP1, SMPD1, SPRY1, STK38, ZNF675]
GO:0043408	regulation of MAPK cascade	92	17.1963	0.02864	[ACKR3, ALK, AMH, ANKRD6, APC, APOE, ARRB2, AXIN1, CBS, CIB1, CNKSR3, DCC, DUSP16, DUSP26, DUSP5, DUSP6, DUSP7, DUSP8, DVL3, EDN1, EPHA2, EPHA7, F2R, F2RL1, FBXW7, FGFR4, FLCN, FZD4, GCNT2, GLIPR2, GNAI2, GPS1, GSTP1, HYAL2, IGBP1, INSR, KIT, KITLG, LPAR1, LRRK2, MAP2K2, MAP2K7, MAP3K11, MAP3K6, MAP3K9, MAP4K1, MAP4K3, MAPK3, MAPK8IP1, MAPK8IP3, MDFI, MEN1, MIF, MUC20, MYD88, NF2, NOX4, NTRK2, NU…
GO:0043409	negative regulation of MAPK cascade	33	27.2727	1.2501004899219005E-4	[APC, APOE, CNKSR3, DUSP16, DUSP26, DUSP5, DUSP6, DUSP7, DUSP8, F2RL1, FLCN, GPS1, GSTP1, HYAL2, IGBP1, MAPK8IP1, MEN1, NF2, NUP62, PDCD4, PIN1, PPP2R1A, PRKCA, PRKCD, RGS14, RPS6KA6, SFRP1, SLC9A3R1, SMPD1, SPRY1, STK38, TNIP1, ZNF675]
GO:0043412	macromolecule modification	454	15.4685	0.0183216	[ABCA1, ACD, ACSL1, ACVR2A, ADCY1, ADCY2, ADCY6, ADRBK1, AIMP2, ALG10, ALG12, ALG3, ALK, AMH, ANAPC11, APC, APOE, ARFGAP1, ARID5A, ARRB2, ARSA, ARSI, ARSJ, ASCC3, ASPH, ATP2B4, ATP6V0D1, ATP7A, ATRX, AXIN1, B3GALT5, B3GALT6, B3GAT3, B4GALT2, BAX, BMP5, BRMS1, BRSK1, C14orf169, CACTIN, CAPN3, CARD10, CARM1, CBS, CBX4, CCNB3, CCND3, CDC14B, CDC25B, CDC37, CDK6, CDK9, CDKL5, CDKN1C, CDKN2A, CDKN2C, …
GO:0043433	negative regulation of sequence-specific DNA binding transcription factor activity	27	21.2598	0.0196186	[ARRB2, BRMS1, CACTIN, CDKN2A, FLNA, GLIS2, ID3, LONP1, MEN1, NFKBIA, NFKBIL1, PARP10, PEX14, PIAS4, RB1, RBCK1, RLIM, SIK1, SIVA1, TCEAL7, TLR9, TNFAIP3, TWIST1, WFS1, WWP2, ZC3H12A, ZNF675]
GO:0043434	response to peptide hormone	73	17.8922	0.0213509	[ADCY1, ADCY2, ADCY6, ADM, APOE, APRT, ATP6V0C, ATP6V0D1, ATP6V0E2, ATP6V1A, BCAR1, BDH1, BSG, CAB39L, CACYBP, CAPN10, CISH, COASY, CPEB2, CPS1, DOK1, EIF4EBP1, FABP3, FAM58A, FGFR4, GAL, GNAI2, GNG11, GNG2, GNG5, GNG7, HSD11B2, INSIG2, INSR, IRS1, JAK3, JUNB, JUND, KANK1, KAT2B, LRP6, MAP2K2, MAPK3, MDM2, MLST8, MTUS1, MYO5A, OGT, PDGFB, PIK3R2, PIK3R3, PPAT, PRKAG2, PRKAR1A, PRKAR1B, PRKCA, PRK…
GO:0043436	oxoacid metabolic process	181	16.4396	0.0177453	[ABHD14A-ACY1, ACOT2, ACOT7, ACOX2, ACSBG1, ACSF2, ACSL1, ACSL4, ACSS1, ACY1, ADC, AGRN, AIMP2, AKR1C1, ALKBH7, AMDHD2, AMH, APOC1, ATCAY, ATIC, ATP7A, B3GALT6, B3GAT3, B4GALT2, BCAT2, BCKDK, BDH2, BSG, C9orf3, CBR1, CBR4, CBS, CCBL1, CFH, CHPF, CHST1, CHST12, CHST14, CHST15, CHST2, CHST3, CHST7, CHST9, CHSY3, CLN3, CNR1, COASY, COMT, CPS1, CRABP2, CRYL1, CSGALNACT1, CTH, CYB5A, CYB5R3, CYP27A1, …
GO:0043506	regulation of JUN kinase activity	20	26.6667	0.0033637	[AXIN1, CBS, DVL3, EDN1, FZD4, GSTP1, MAP2K7, MAP3K11, MAP3K6, MAP3K9, MAP4K1, MAPK8IP1, MAPK8IP3, MDFI, PDCD4, SFRP1, TLR9, TRAF2, WNT5A, ZNF675]
GO:0043507	positive regulation of JUN kinase activity	14	23.3333	0.0393782	[AXIN1, DVL3, EDN1, FZD4, MAP2K7, MAP3K11, MAP3K6, MAP3K9, MAP4K1, MAPK8IP3, MDFI, TLR9, TRAF2, WNT5A]
GO:0043508	negative regulation of JUN kinase activity	5	38.4615	0.0277156	[GSTP1, MAPK8IP1, PDCD4, SFRP1, ZNF675]
GO:0043516	regulation of DNA damage response, signal transduction by p53 class mediator	10	31.25	0.0108675	[AMH, CDKN2A, DDX5, HIC1, MDM2, MIF, MMAB, PLA2R1, TWIST1, ZNF385A]
GO:0043517	positive regulation of DNA damage response, signal transduction by p53 class mediator	6	37.5	0.0184017	[CDKN2A, DDX5, HIC1, MMAB, PLA2R1, ZNF385A]
GO:0043534	blood vessel endothelial cell migration	15	22.3881	0.0469417	[AMOT, APOE, CIB1, EPHA2, GPX1, HDAC7, HSPB1, MYH9, NELL1, NR4A1, PDGFB, PRKCA, SCARB1, SRF, VEGFC]
GO:0043536	positive regulation of blood vessel endothelial cell migration	7	29.1667	0.0446612	[AMOT, CIB1, HDAC7, HSPB1, PDGFB, PRKCA, VEGFC]
GO:0043542	endothelial cell migration	30	22.2222	0.00777585	[AMOT, APOE, BCAR1, CIB1, CORO1B, EDN1, EPHA2, GIPC1, GPX1, HDAC7, HSPB1, ITGB3, LOXL2, MEN1, MYH9, NELL1, NELL2, NOS3, NR4A1, PDGFB, PPAP2B, PRKCA, PRKX, PTEN, SCARB1, SRF, TNFSF12, VEGFC, WNT5A, ZNF580]
GO:0043547	positive regulation of GTPase activity	36	20.339	0.0158486	[AGRN, ARFGAP1, ARHGAP24, ARHGEF10L, ARHGEF16, ARHGEF19, AXIN1, CDKL5, CHN2, DLC1, EPHA2, GNAO1, LLGL1, LRRK2, NDEL1, OCRL, PGAM5, PIN1, RAB3GAP1, RALGAPA1, RALGAPA2, RAPGEF1, RAPGEF2, RGS10, RGS14, RGS19, RGS5, RGS8, RHOG, SFRP1, SIPA1, SRGAP3, SYDE1, TAX1BP3, TBC1D10B, VAV3]
GO:0043549	regulation of kinase activity	129	17.6712	0.00455884	[ACD, ACSL1, ADCY1, ADCY2, ADCY6, ALK, AMH, APC, APOE, ARFGAP1, ATP6V0D1, AXIN1, BAD, CARD10, CBS, CCNB3, CCND3, CDC25B, CDC37, CDKN1C, CDKN2A, CDKN2C, CIB1, CSF1, CXXC1, DAB1, DUSP16, DUSP26, DUSP5, DUSP6, DUSP7, DUSP8, DVL1, DVL3, EDN1, EIF2S1, F2R, FAM58A, FBXW7, FZD4, GMFB, GNAI2, GPS1, GSTP1, HERC5, HEXIM1, HSPA2, HSPB1, HYAL2, INSR, IRS1, ITGB3, KAT2B, KIT, KITLG, LATS1, LONP1, LPAR1, LRP6,…
GO:0043654	recognition of apoptotic cell	3	75	0.0102844	[MEGF10, PEAR1, SCARB1]
GO:0043691	reverse cholesterol transport	6	35.2941	0.0250884	[ABCA1, ABCA5, APOE, APOM, CLU, SCARB1]
GO:0043900	regulation of multi-organism process	45	18.2186	0.0463621	[AMH, AP1B1, AP1G1, AP2A1, AP2S1, ARF1, BAD, C1QBP, C9orf69, CACTIN, CDK9, CNR1, CTDP1, DDX5, DDX60, DEAF1, DICER1, F2RL1, GTF2F1, HERC5, HLA-A, HMGA2, HS3ST5, IFIT1, IFITM1, IFITM2, ISG15, MIF, MNAT1, MYD88, NELFA, NFKBIL1, NLRX1, PFN1, PML, POLR2E, POLR2I, POLR2J, POLR2L, PRKCA, RAD23A, SMARCA4, TIMP1, TNFAIP3, TNIP1]
GO:0044087	regulation of cellular component biogenesis	86	18.4154	0.00642172	[ADD2, AGRN, AMOT, APC, ARF1, ARHGAP24, ARHGAP6, ARHGEF10L, ARL2, ARPC1B, ARPC5, BAX, BID, CAPZA2, CDC42EP1, CLU, CNOT6, CORO1A, CORO1B, DLC1, EDN1, EIF4EBP1, EPHA2, EPHB2, EPHB3, F2RL1, FASN, FHOD1, FHOD3, GPM6B, HCFC1, JMY, KANK1, KIAA1324, KIT, LATS1, LDB2, LIMK1, LRRC16A, LRRC4B, MED25, MLST8, MPP7, MYADM, MYO1C, NCAM1, NCK2, NEDD4L, NF2, NLGN3, NOX4, NR1H2, NUDT16, PAK3, PARP10, PEX14, PFN1,…
GO:0044092	negative regulation of molecular function	154	18.0328	8.656688347722205E-4	[A2M, ACTN2, AES, AMOT, ANAPC11, ANXA5, APBA3, APC, APOC1, APOE, ARL2, ARRB2, ATP7A, AURKAIP1, BAX, BCL2L12, BRMS1, CACTIN, CARM1, CASC5, CDKN1C, CDKN2A, CDKN2C, CLN3, CNR1, CPEB2, CST3, CYP2D6, DLC1, DLG2, DNAJB6, DUSP16, DUSP26, DUSP5, DUSP6, DUSP7, DUSP8, DVL1, ELFN1, FGF12, FLNA, FURIN, GLIS2, GMFB, GNAI2, GPI, GPS1, GPX1, GRM3, GSTM2, GSTP1, HEXIM1, HMGA2, HSPB1, HSPBP1, HYAL2, ID3, IFIT1, I…
GO:0044093	positive regulation of molecular function	224	17.4184	4.869002679483682E-4	[ACD, ACSL1, ACTN2, ACTN4, ADCY1, ADCY2, ADCY6, ADD2, ADRBK1, ADRM1, AGRN, AGTR1, AHSA1, AKAP6, ALK, AMH, ANAPC11, ANK3, APAF1, APOC1, APOE, ARFGAP1, ARHGAP24, ARHGAP6, ARHGEF10L, ARHGEF16, ARHGEF19, ASPH, ATP6V0D1, ATP7A, AXIN1, BAD, BAMBI, BAX, BCL2L13, BEX1, BEX2, BID, BOK, CAPN3, CARD10, CARD8, CCND3, CDC14B, CDC25B, CDKL5, CDKN2A, CFLAR, CHERP, CHN2, CIB1, CLU, CNOT6, CRADD, CRTC1, CSF1, CTH…
GO:0044248	cellular catabolic process	347	16.05	0.00541909	[ABCA2, ACAP3, ACD, ACOT7, ACOX2, ACSL1, ADAMTS7, AGAP3, AGO1, AGO2, AGRN, AHSA1, AMDHD2, AMOT, ANAPC11, APAF1, APOC1, APOE, ARF1, ARFGAP1, ARHGAP24, ARHGAP6, ARHGEF1, ARHGEF10L, ARHGEF16, ARHGEF17, ARHGEF18, ARHGEF19, ARL2, ARL8A, ARRB2, ARSA, ATG2A, ATG4D, ATG9B, ATP5D, AXIN1, BAD, BAX, BCAT2, BCKDK, BDH1, BDH2, BLVRA, BVES, CBS, CCBL1, CDKL5, CDKN2A, CHD8, CHN1, CHN2, CLN3, CLN6, CLPP, CLU, CN…
GO:0044249	cellular biosynthetic process	860	15.4871	4.708645480546017E-4	[AATF, ABCA1, ABCA2, ABHD14B, ABLIM1, ABLIM2, ACD, ACOT7, ACOX2, ACSL1, ACSL4, ACSS1, ACVR2A, ADC, ADCY1, ADCY2, ADCY6, ADK, ADM, ADRM1, AEBP1, AES, AGO1, AGO2, AGPAT2, AGRN, AIMP2, AK4, AK5, AKAP12, AKAP17A, AKAP5, AKAP6, ALDOA, ALG10, ALG12, ALG3, ALK, AMH, ANP32A, APOC1, APOE, APRT, ARF1, ARHGEF10L, ARID3A, ARID5A, ARMCX3, ARRB2, ARX, ASCC2, ASCC3, ASPH, ATF5, ATIC, ATN1, ATOH8, ATP5D, ATP7A, …
GO:0044255	cellular lipid metabolic process	165	17.2775	0.00372175	[ABCA1, ACOT2, ACOT7, ACOX2, ACSBG1, ACSF2, ACSL1, ACSL4, ACSS1, AGPAT2, AGRN, AGTR1, AKR1C1, ALKBH7, AMH, APOC1, APOE, ARF1, ARSA, ARSI, ARSJ, BAX, BDH1, BDH2, C9orf3, CARM1, CBR1, CBR4, CDS2, CERS6, CLN3, CLN6, CNR1, COLGALT1, COQ2, CPS1, CRABP2, CRYL1, CSNK1G2, CYP2D6, CYP2U1, DAGLA, DGKZ, DOLPP1, DPM2, DPM3, ECH1, ECHDC2, ECI1, EDN1, EGFL7, ETNK2, FABP3, FABP5, FAM213B, FAM3A, FAM58A, FASN, F…
GO:0044270	cellular nitrogen compound catabolic process	190	16.7549	0.00731912	[ABCA2, ACAP3, AGAP3, AGO1, AGO2, AGRN, AHSA1, AMOT, APAF1, ARF1, ARFGAP1, ARHGAP24, ARHGAP6, ARHGEF1, ARHGEF10L, ARHGEF16, ARHGEF17, ARHGEF18, ARHGEF19, ARL2, ARL8A, ARRB2, ATP5D, AXIN1, BAX, BLVRA, BVES, CCBL1, CDKL5, CDKN2A, CHD8, CHN1, CHN2, CNOT3, CNOT6, CPEB2, CYP2D6, DCTPP1, DDX17, DDX39B, DDX54, DENND3, DENND4A, DENND4B, DENND5B, DHX34, DLC1, DNAJB6, DNASE2, DNM2, DNM3, DNPH1, DPYSL5, EDC…
GO:0044271	cellular nitrogen compound biosynthetic process	616	15.0538	0.0421144	[AATF, ABCA1, ABCA2, ABHD14B, ABLIM1, ABLIM2, ACOT7, ACVR2A, ADC, ADCY1, ADCY2, ADCY6, ADK, ADM, ADRM1, AEBP1, AES, AGO1, AGO2, AGRN, AK4, AK5, AKAP12, AKAP17A, AKAP5, AKAP6, ALDOA, ALK, AMH, ANP32A, APOE, APRT, ARHGEF10L, ARID3A, ARID5A, ARMCX3, ARRB2, ARX, ASCC2, ASCC3, ASPH, ATF5, ATIC, ATN1, ATOH8, ATP5D, ATRX, AURKAIP1, AXIN1, BAHD1, BAMBI, BANP, BAZ2B, BCL2L12, BCL3, BCL9L, BDH2, BEX1, BEX2…
GO:0044281	small molecule metabolic process	503	16.4918	4.741137196932148E-5	[ABCA1, ABCA2, ABCC5, ABHD14A-ACY1, ACAP3, ACOT2, ACOT7, ACOX2, ACSBG1, ACSF2, ACSL1, ACSL4, ACSS1, ACY1, ADC, ADCY1, ADCY2, ADCY6, ADK, ADM, AGAP3, AGPAT2, AGRN, AHSA1, AIMP2, AK4, AK5, AKAP12, AKAP5, AKAP6, AKR1C1, AKR7A2, ALDOA, ALDOC, ALKBH7, AMDHD2, AMH, AMOT, APOC1, APOE, APRT, ARF1, ARFGAP1, ARHGAP24, ARHGAP6, ARHGEF1, ARHGEF10L, ARHGEF16, ARHGEF17, ARHGEF18, ARHGEF19, ARL2, ARL8A, ARRB2, …
GO:0044332	Wnt signaling pathway involved in dorsal/ventral axis specification	3	50	0.0411606	[LRP5L, LRP6, SFRP1]
GO:0044342	type B pancreatic cell proliferation	4	44.4444	0.0283893	[ADK, BAD, IGFBP5, SFRP1]
GO:0044344	cellular response to fibroblast growth factor stimulus	43	19.9074	0.0130588	[ADCY1, ADCY2, ADCY6, ADRBK1, AGO1, AGO2, BAD, CPS1, DUSP6, FAM58A, FGF12, FGF14, FGFR4, FIBP, FRS3, HYAL2, IRS1, ITPR3, KIT, KITLG, MAP2K2, MAPK3, MDM2, MLST8, NR4A1, PAK3, PDE1A, PDGFB, PIK3R2, PPP2R1A, PRKAR1A, PRKAR1B, PRKCA, PRKCD, PTEN, RAB14, SFRP1, SNCA, SPRY1, SULF1, THEM4, TNRC6B, WNT5A]
GO:0044539	long-chain fatty acid import	3	50	0.0411606	[ACSL1, FABP3, SLC27A4]
GO:0044711	single-organism biosynthetic process	263	17.3942	1.6878568672342613E-4	[ABCA1, ABCC5, ACD, ACOT7, ACOX2, ACSL1, ACSL4, ACSS1, ADCY1, ADCY2, ADCY6, ADK, ADM, AGPAT2, AGRN, AK4, AK5, AKAP12, AKAP5, AKAP6, ALDOA, ALDOC, AMH, AP2A1, AP3D1, APOC1, APOE, APRT, ARF1, ATIC, ATP5D, B3GALT6, B3GAT3, B4GALT2, BCAT2, BDH1, BDH2, BMP5, C1QBP, C1QTNF3, C1orf86, C9orf3, CBR1, CBR4, CBS, CCBL1, CDS2, CDT1, CERS6, CHPF, CHST1, CHST12, CHST14, CHST15, CHST2, CHST3, CHST7, CHST9, CHSY…
GO:0044712	single-organism catabolic process	250	16.129	0.0142298	[ABCA2, ABHD4, ACAP3, ACOT7, ACOX2, AGAP3, AGRN, AHSA1, ALDOA, ALDOC, AMDHD2, AMOT, APOC1, APOE, ARF1, ARFGAP1, ARHGAP24, ARHGAP6, ARHGEF1, ARHGEF10L, ARHGEF16, ARHGEF17, ARHGEF18, ARHGEF19, ARL2, ARL8A, ARRB2, ATG9B, ATP5D, AXIN1, BAD, BCAT2, BCKDK, BDH1, BDH2, BLVRA, BSCL2, BVES, CBS, CCBL1, CDKL5, CHD8, CHN1, CHN2, CLN3, CNR1, COASY, COL11A1, COL18A1, COL23A1, COL26A1, COL5A1, COL9A1, CPEB2, C…
GO:0045017	glycerolipid biosynthetic process	48	19.5918	0.0122433	[ACSL1, ACSL4, AGPAT2, ARF1, CDS2, DPM2, DPM3, ETNK2, FABP5, FASN, FBXW7, FITM2, GPAA1, GPCPD1, GPD1L, HSD17B12, INPP5E, LPGAT1, LPL, MBOAT1, MBOAT7, NR1H2, OCRL, PCYT1B, PCYT2, PDGFB, PEMT, PGAP1, PIGQ, PIGT, PIK3R2, PIK3R3, PIP5K1C, PLA2G12A, PLA2G3, PLA2G4A, PLA2G6, PLB1, PLD3, PNPLA2, PTDSS2, PTEN, SCARB1, SH2D3C, SIK1, SLC25A1, SREBF1, VAC14]
GO:0045185	maintenance of protein location	31	25	0.00100317	[ANK3, APC, ARL2, BCL3, CASC5, DBN1, EPB41L3, FBN1, FBN2, FLNA, GOPC, GPAA1, GRIK5, JUP, LATS1, MDFI, NBL1, NFKBIA, NFKBIE, NFKBIL1, PEX14, PIP5K1C, PKD1, PML, RB1, TEX14, TLN1, TONSL, TRIP6, TWF2, ZNF268]
GO:0045214	sarcomere organization	9	27.2727	0.0367556	[ACTG1, CAPN3, EDN1, FHOD3, MYH3, OBSCN, PRKAR1A, SRF, TPM1]
GO:0045216	cell-cell junction organization	48	23.6453	2.1268223968251806E-4	[ACTB, ACTG1, ACTN1, ACTN2, ACTN4, AMOT, APC, ARHGAP6, ARL2, DLC1, EPB41L3, F11R, FBF1, FERMT2, FLCN, FRMPD2, GJA5, GPM6B, HDAC7, JUP, LAMA5, LIMS2, MICALL2, MLLT4, MPP5, MPP7, MYADM, MYO1C, NEDD4L, NF2, NUMBL, PARD6A, PIP5K1C, PPM1F, PRKCA, PTEN, PTPRO, PVR, PVRL1, PVRL2, PXDN, SFRP1, SHROOM2, SRF, TESK2, TLN1, TRIP6, UGT8]
GO:0045595	regulation of cell differentiation	221	17.2791	8.267113726404308E-4	[ABCA1, ABCA5, ACVR2A, ADAMTS7, ADM, AGTR1, AKAP6, AP3D1, APC, APOE, ARHGAP4, ARHGDIA, ARHGEF1, ATF5, AXIN1, BAD, BAMBI, BAX, BCL9L, BMP5, BTG1, C14orf169, C1QBP, CAPN3, CARM1, CD276, CDK6, CDKL5, CDKN2A, CFLAR, CHN1, CIB1, CNOT3, CNR1, CSF1, CXXC1, DAB1, DBN1, DCC, DDX17, DDX5, DICER1, DISC1, DUSP6, DVL1, EDN1, EHD1, EHD2, EPHB2, EPHB3, ESRRA, EYA1, FAM213A, FAM58A, FASN, FBN2, FLCN, FLT3LG, FOX…
GO:0045597	positive regulation of cell differentiation	104	17.1334	0.0231343	[ACVR2A, ADM, AGTR1, AKAP6, AP3D1, APC, APOE, ARHGDIA, BAD, BAMBI, BCL9L, BTG1, C1QBP, CARM1, CD276, CDKL5, CIB1, CSF1, DAB1, DICER1, DISC1, EPHB2, FAM58A, FBN2, FLT3LG, GCNT2, GLI2, GLIPR2, HIF1AN, HMG20B, ID4, IFITM1, IL4R, ISG15, JUNB, JUND, KIT, KITLG, KMT2E, LIMK1, LOXL2, LPL, LRRC16A, LTBP3, MAN2A1, MAP1B, MAPK8IP3, MEGF8, MEN1, METRN, MYADM, NBL1, NDEL1, NELL1, NEO1, NFKB1, NTN1, NTRK2, NU…
GO:0045664	regulation of neuron differentiation	80	19.3237	0.00232425	[APOE, ARHGAP4, ARHGDIA, ARHGEF1, BMP5, CDKL5, CHN1, CIB1, CNR1, CXXC1, DAB1, DBN1, DCC, DICER1, DISC1, DVL1, EPHB2, EPHB3, EYA1, GLI2, HMG20B, ID4, KANK1, KATNB1, LIMK1, LPAR1, LRP8, LRRC4C, LRRK2, MAGI2, MAP1B, MAPK8IP3, MEGF8, METRN, MIB1, NBL1, NCS1, NDEL1, NELL1, NLGN3, NOTCH3, NOTCH4, NREP, NSMF, NTN1, NTRK2, NUMBL, OBSL1, PTEN, PTPRO, RAPGEF1, RAPGEF2, RARB, RTN4R, RYK, SALL1, SCARF1, SDC2…
GO:0045667	regulation of osteoblast differentiation	23	21.4953	0.0262477	[ACVR2A, APC, C14orf169, CD276, CDK6, DDX5, ESRRA, FBN2, HDAC7, ID3, ID4, IFITM1, IGFBP5, JUND, MEN1, NELL1, PDLIM7, PRKCA, SFRP1, SMAD5, SOX11, SOX2, TWIST1]
GO:0045732	positive regulation of protein catabolic process	24	24.4898	0.00468581	[APC, APOE, AXIN1, CLU, DVL1, EGLN2, FURIN, GGA1, HSPBP1, IER3, LRRK2, MAPK15, MDM2, MYLIP, NDFIP1, NEDD4L, PLK2, PTEN, SGSM3, SOX9, STUB1, TNFAIP3, WNT5A, ZNF268]
GO:0045736	negative regulation of cyclin-dependent protein serine/threonine kinase activity	9	37.5	0.00407519	[APC, CDKN2A, HEXIM1, KAT2B, LATS1, MEN1, PAK3, PTEN, TNFAIP3]
GO:0045746	negative regulation of Notch signaling pathway	7	31.8182	0.0283607	[DLK1, EGFL7, FBXW7, HIF1AN, NFKBIA, RITA1, SLC35C1]
GO:0045773	positive regulation of axon extension	11	40.7407	6.803817412336395E-4	[APOE, CDKL5, LIMK1, MAP1B, MEGF8, NDEL1, NELL1, NTN1, SEMA7A, TNFRSF12A, TWF2]
GO:0045785	positive regulation of cell adhesion	36	22.5	0.00307018	[ANK3, APC, ARL2, C1QBP, CCDC80, CDK6, CIB1, COL26A1, CSF1, CXXC1, DUSP26, EMILIN1, EMP2, FLCN, GCNT2, GPR56, HAS2, HSD17B12, ITGA5, KIFAP3, LDB2, LRRC16A, MYADM, PIEZO1, PPAP2B, PPM1F, PRKCA, RAC3, RELL2, SFRP1, SPOCK2, TPM1, TRIOBP, UTRN, VAV3, WNT5A]
GO:0045786	negative regulation of cell cycle	67	18.663	0.0110894	[AMH, ANAPC11, ANAPC15, APC, AURKAIP1, CAB39L, CDK6, CDK9, CDKN1C, CDKN2A, CDKN2C, CFH, CRADD, DDX39B, DGKZ, E4F1, GAS2L1, HBP1, HEXIM1, HMGA2, JMY, KAT2B, KMT2E, LATS1, MAD1L1, MAGI2, MDM2, MDM4, MED25, MEN1, MIF, MYBBP1A, NOTCH2, PAK3, PDCD4, PIDD, PKD1, PML, PPP2R3B, PRKAG2, PRKCA, PSMB10, PSMF1, PTEN, RB1, RBM38, RHOB, RNF167, RPS6KA2, RPTOR, SESN1, SGSM3, SIPA1, SOX2, STK11, TAF6, TBRG4, TEX…
GO:0045859	regulation of protein kinase activity	125	18.0375	0.00254276	[ACD, ACSL1, ADCY1, ADCY2, ADCY6, ALK, AMH, APC, APOE, ARFGAP1, ATP6V0D1, AXIN1, CARD10, CBS, CCNB3, CCND3, CDC25B, CDC37, CDKN1C, CDKN2A, CDKN2C, CIB1, CSF1, CXXC1, DAB1, DUSP16, DUSP26, DUSP5, DUSP6, DUSP7, DUSP8, DVL1, DVL3, EDN1, EIF2S1, F2R, FAM58A, FBXW7, FZD4, GMFB, GNAI2, GPS1, GSTP1, HERC5, HEXIM1, HSPA2, HSPB1, HYAL2, INSR, ITGB3, KAT2B, KIT, KITLG, LATS1, LONP1, LPAR1, LRP6, LRP8, LRRK…
GO:0045862	positive regulation of proteolysis	19	24.0506	0.0134501	[APOE, ASPH, AURKAIP1, AXIN1, BAD, CAPN3, CLN6, CLU, DVL1, FGFR4, FURIN, HSPBP1, LRRK2, MDM2, OGT, PLK2, PTEN, STUB1, WFS1]
GO:0045896	regulation of transcription during mitosis	3	60	0.022992	[RB1, SMARCA4, ZNF268]
GO:0045936	negative regulation of phosphate metabolic process	76	21.902	6.203419269928331E-5	[AKAP6, APC, APOC1, APOE, BAX, CACTIN, CDKN1C, CDKN2A, CDKN2C, CIB1, CNKSR3, CPEB2, DUSP16, DUSP26, DUSP5, DUSP6, DUSP7, DUSP8, DVL1, EDN1, F2RL1, FAM129A, FLCN, GMFB, GNAI2, GPD1L, GPS1, GRM3, GSTP1, HEXIM1, HSPB1, HYAL2, IGBP1, KAT2B, LATS1, LRP6, MAPK7, MAPK8IP1, MEN1, MICAL1, MLLT1, MYADM, NF2, NUP62, PAK3, PDCD4, PDGFB, PIN1, PKIA, PPAP2B, PPM1F, PPP2R1A, PRKAG2, PRKAR1A, PRKAR1B, PRKCA, PRK…
GO:0045974	regulation of translation, ncRNA-mediated	4	44.4444	0.0283893	[AGO1, AGO2, RBM4, ZFP36]
GO:0046021	regulation of transcription from RNA polymerase II promoter, mitotic	3	75	0.0102844	[RB1, SMARCA4, ZNF268]
GO:0046039	GTP metabolic process	96	18.5687	0.00324251	[ACAP3, AGAP3, AGRN, AK4, AMOT, ARF1, ARFGAP1, ARHGAP24, ARHGAP6, ARHGEF1, ARHGEF10L, ARHGEF16, ARHGEF17, ARHGEF18, ARHGEF19, ARL2, ARL8A, ARRB2, AXIN1, BVES, CDKL5, CHN1, CHN2, CPEB2, DENND3, DENND4A, DENND4B, DENND5B, DLC1, DNM2, DNM3, EPHA2, EPHB3, FGD3, GIT1, GNAO1, GNG11, GNG5, GNL3, KALRN, LLGL1, LRRK2, MLST8, MTG1, NDEL1, NME1-NME2, NME4, NME5, NTRK2, OCRL, PGAM5, PIN1, PTGES2, RAB11B, RAB…
GO:0046128	purine ribonucleoside metabolic process	135	17.067	0.0122539	[ABCA2, ACAP3, ACOT7, ADK, AGAP3, AGRN, AK4, AK5, ALDOA, AMOT, APRT, ARF1, ARFGAP1, ARHGAP24, ARHGAP6, ARHGEF1, ARHGEF10L, ARHGEF16, ARHGEF17, ARHGEF18, ARHGEF19, ARL2, ARL8A, ARRB2, ATP5D, ATP6V1A, AXIN1, BAD, BVES, CDKL5, CHD8, CHN1, CHN2, COASY, CPEB2, DCAKD, DDX17, DDX39B, DDX54, DENND3, DENND4A, DENND4B, DENND5B, DLC1, DNM2, DNM3, ENPP4, EPHA2, EPHB3, FGD3, FLCN, GIT1, GNAO1, GNG11, GNG5, GN…
GO:0046130	purine ribonucleoside catabolic process	115	17.1642	0.0167967	[ABCA2, ACAP3, AGAP3, AGRN, AMOT, ARF1, ARFGAP1, ARHGAP24, ARHGAP6, ARHGEF1, ARHGEF10L, ARHGEF16, ARHGEF17, ARHGEF18, ARHGEF19, ARL2, ARL8A, ARRB2, ATP5D, AXIN1, BVES, CDKL5, CHD8, CHN1, CHN2, CPEB2, DDX17, DDX39B, DDX54, DENND3, DENND4A, DENND4B, DENND5B, DLC1, DNM2, DNM3, ENPP4, EPHA2, EPHB3, FGD3, GIT1, GNAO1, GNG11, GNG5, GNL3, KALRN, KATNB1, LLGL1, LRRK2, MLST8, MNAT1, MTG1, MYH10, MYH3, MYH…
GO:0046148	pigment biosynthetic process	14	26.9231	0.0119012	[AP3D1, APRT, COASY, DDT, FECH, IBA57, MYO5A, PMEL, PPAT, PRTFDC1, RAPGEF2, SLC25A39, SOX2, TSPO]
GO:0046386	deoxyribose phosphate catabolic process	6	33.3333	0.0332155	[MPG, MUTYH, NT5C, NTHL1, NUDT16, TDG]
GO:0046426	negative regulation of JAK-STAT cascade	6	42.8571	0.00887983	[DAB1, HGS, HMGA2, NF2, PPP2R1A, SAC3D1]
GO:0046434	organophosphate catabolic process	145	18.0124	0.00127195	[ABCA2, ACAP3, AGAP3, AGRN, AHSA1, AMOT, APOC1, ARF1, ARFGAP1, ARHGAP24, ARHGAP6, ARHGEF1, ARHGEF10L, ARHGEF16, ARHGEF17, ARHGEF18, ARHGEF19, ARL2, ARL8A, ARRB2, ATP5D, AXIN1, BVES, CDKL5, CHD8, CHN1, CHN2, CPEB2, DCTPP1, DDX17, DDX39B, DDX54, DENND3, DENND4A, DENND4B, DENND5B, DLC1, DNAJB6, DNM2, DNM3, DNPH1, ENPP3, EPHA2, EPHB3, FGD3, GIT1, GNAO1, GNG11, GNG5, GNL3, GPD1L, GPX1, IMPA2, INPP5E, …
GO:0046460	neutral lipid biosynthetic process	14	23.3333	0.0393782	[ACSL1, ACSL4, AGPAT2, FASN, FBXW7, FITM2, GPD1L, HSD17B12, LPL, NR1H2, SCARB1, SIK1, SLC25A1, SREBF1]
GO:0046463	acylglycerol biosynthetic process	14	23.3333	0.0393782	[ACSL1, ACSL4, AGPAT2, FASN, FBXW7, FITM2, GPD1L, HSD17B12, LPL, NR1H2, SCARB1, SIK1, SLC25A1, SREBF1]
GO:0046465	dolichyl diphosphate metabolic process	3	60	0.022992	[DOLPP1, MVD, SRD5A3]
GO:0046486	glycerolipid metabolic process	65	19.174	0.00674223	[ACSL1, ACSL4, AGPAT2, APOC1, APOE, ARF1, CDS2, CPS1, DAGLA, DPM2, DPM3, ETNK2, FABP5, FASN, FBXW7, FITM2, GPAA1, GPCPD1, GPD1L, GPX1, HSD17B12, IMPA2, INPP5E, INSIG2, IP6K3, LIPE, LPGAT1, LPL, MBOAT1, MBOAT7, NR1H2, OCRL, PCYT1B, PCYT2, PDGFB, PEMT, PGAP1, PIGQ, PIGT, PIK3R2, PIK3R3, PIP5K1C, PLA2G12A, PLA2G15, PLA2G3, PLA2G4A, PLA2G6, PLB1, PLD3, PNPLA2, PNPLA6, PPP1CA, PRKCA, PTDSS2, PTEN, SCA…
GO:0046578	regulation of Ras protein signal transduction	65	20	0.00246429	[ABCA1, ACAP3, AGAP3, AGRN, APOE, ARFGAP1, ARHGAP24, ARHGEF1, ARHGEF10L, ARHGEF16, ARHGEF19, BVES, CDKL5, CHN1, CSF1, DENND3, DENND4A, DENND4B, DENND5B, DGKZ, DLC1, EPHA2, EPHB3, F2R, F2RL1, FGD3, FLCN, FLOT1, GIT1, GPR56, KANK1, KITLG, LLGL1, LPAR1, MLST8, NDEL1, NOTCH2, NTRK2, NUP62, OCRL, OGT, PIN1, PTGES2, RAB3GAP1, RALGAPA1, RALGAPA2, RAPGEF1, RAPGEF2, RHOG, RIN2, RIN3, SBF1, SFRP1, SGSM3, S…
GO:0046596	regulation of viral entry into host cell	3	50	0.0411606	[HS3ST5, IFITM1, IFITM2]
GO:0046685	response to arsenic-containing substance	7	33.3333	0.0219659	[CPEB2, FECH, MKNK2, PAK3, PTEN, RBM4, TNFRSF11B]
GO:0046700	heterocycle catabolic process	187	16.4758	0.0148713	[ABCA2, ACAP3, AGAP3, AGO1, AGO2, AGRN, AHSA1, AMOT, APAF1, ARF1, ARFGAP1, ARHGAP24, ARHGAP6, ARHGEF1, ARHGEF10L, ARHGEF16, ARHGEF17, ARHGEF18, ARHGEF19, ARL2, ARL8A, ARRB2, ATP5D, AXIN1, BAX, BLVRA, BVES, CCBL1, CDKL5, CDKN2A, CHD8, CHN1, CHN2, CNOT3, CNOT6, CPEB2, DCTPP1, DDX17, DDX39B, DDX54, DENND3, DENND4A, DENND4B, DENND5B, DHX34, DLC1, DNAJB6, DNASE2, DNM2, DNM3, DNPH1, DPYSL5, EDC4, ENPP3…
GO:0046718	viral entry into host cell	6	33.3333	0.0332155	[HS3ST5, HYAL2, IFITM1, IFITM2, PVRL1, WWP2]
GO:0046777	protein autophosphorylation	39	18.75	0.0413056	[ALK, CDKL5, CLK1, CLK3, CLK4, CSNK1G2, DAPK3, DDR1, EIF2S1, EPHA7, EPHB3, FGFR4, GPI, INSR, KIT, LONP1, LRRK2, MAP2K2, MAP3K11, MAP3K9, MAPK15, MAPK3, MMAB, MOB1B, NTRK2, PDGFB, PEAK1, PIM3, PRKCA, PRKX, RAP2B, SIK1, STK11, TELO2, TOM1L1, UHMK1, ULK1, ULK3, VEGFC]
GO:0046822	regulation of nucleocytoplasmic transport	36	18.8482	0.0452638	[AKAP6, AXIN1, BAMBI, BCL3, C1QTNF3, CDKN2A, CHERP, EMD, FLNA, HYAL2, IER3, JUP, KANK1, LITAF, MAPK7, MDFI, MDM2, NFKBIA, NFKBIE, NFKBIL1, PAK3, PARP10, PKD1, PKIA, PRKCA, RBCK1, RBM4, SMOX, TLR9, TONSL, TRIP6, UACA, UHMK1, ZC3H3, ZIC1, ZNF268]
GO:0048011	neurotrophin TRK receptor signaling pathway	67	22.7119	5.212091233878643E-5	[AATF, ADCY1, ADCY2, ADCY6, ADRBK1, AGO1, AGO2, AP2A1, AP2S1, ARHGAP4, ARHGDIA, ARHGEF1, ARHGEF16, ARHGEF17, ARHGEF18, BAD, BCAR1, CLTA, DNAL4, DUSP6, DUSP7, ELK1, FGD3, FGFR4, FURIN, IRS1, ITGB3BP, ITPR3, KALRN, KCNH8, KIT, KITLG, MAP2K2, MAPK3, MAPK7, MDM2, MLST8, MYD88, NFKB1, NFKBIA, NR4A1, NTRK2, OBSCN, PAK3, PCSK6, PDE1A, PDGFB, PIK3R2, PRKAR1A, PRKAR1B, PRKCA, PRKCD, PTEN, RAPGEF1, RELA, R…
GO:0048041	focal adhesion assembly	13	23.6364	0.0419247	[ACTN1, ACTN2, ARHGAP6, DLC1, FERMT2, GPM6B, LAMA5, PPM1F, PTEN, PXDN, SFRP1, TESK2, TRIP6]
GO:0048167	regulation of synaptic plasticity	31	25.2033	8.685534412739499E-4	[ABHD6, APOE, ARF1, ATP2B4, DBN1, DHX34, EPHB2, FAM58A, GIPC1, GNAI2, GRIK5, ITPR3, JPH4, KCNJ10, KIT, LLGL1, NCDN, NLGN3, NOL3, NSMF, NTRK2, PICK1, PLK2, PTEN, RAPGEF2, RGS14, SHANK3, SNCA, SRF, SYP, UNC13A]
GO:0048168	regulation of neuronal synaptic plasticity	15	29.4118	0.00386534	[APOE, DBN1, EPHB2, FAM58A, GRIK5, KCNJ10, KIT, LLGL1, NCDN, NOL3, NSMF, SHANK3, SNCA, SYP, UNC13A]
GO:0048468	cell development	310	17.5538	1.972661800558138E-5	[ABLIM1, ABLIM2, ACSL4, ACTB, ACTG1, ADCY1, ADM, AGRN, AKAP6, AKIP1, ALK, ANK3, AP2A1, AP2S1, APC, APOE, ARHGAP39, ARHGAP4, ARHGDIA, ARHGEF1, ARX, ATCAY, ATF5, ATP2B4, ATP7A, AXIN1, BAD, BAI1, BAMBI, BAX, BCL9L, BLOC1S2, BMP5, BRSK1, BTG1, BVES, C1QBP, CABYR, CACNB2, CACNB4, CAPN3, CASC5, CDC25B, CDK6, CDKL5, CDKN1C, CFLAR, CHN1, CHRNB1, CIB1, CLMN, CLTA, CNOT3, CNR1, CNTNAP2, COL11A1, COL18A1, C…
GO:0048488	synaptic vesicle endocytosis	8	33.3333	0.0146387	[CACFD1, LLGL1, PIP5K1C, RAB3A, SNCA, SYP, UNC13A, ZDHHC15]
GO:0048489	synaptic vesicle transport	16	21.9178	0.0488318	[AP3D1, BLOC1S2, CACFD1, DNM2, GRIK5, LLGL1, PCLO, PIP5K1C, RAB3A, SEPT5, SNAP25, SNCA, STX7, SYP, UNC13A, ZDHHC15]
GO:0048518	positive regulation of biological process	683	15.9133	1.2917363127658212E-4	[A2M, AATF, ABCA1, ABHD14B, ABLIM1, ABLIM2, ACD, ACKR3, ACSL1, ACSL4, ACTB, ACTG1, ACTN2, ACTN4, ACVR2A, ADAMTSL4, ADCY1, ADCY2, ADCY6, ADK, ADM, ADRBK1, AES, AGO2, AGPAT2, AGRN, AGTR1, AIMP2, AKAP12, AKAP5, AKAP6, AKR1C1, ALK, AMH, AMOT, ANAPC11, ANK3, ANKRD6, AP1G1, AP3D1, APAF1, APC, APLN, APOC1, APOE, ARF1, ARFGAP1, ARHGAP4, ARHGAP6, ARHGDIA, ARHGEF10L, ARHGEF16, ARHGEF17, ARHGEF18, ARID3A, A…
GO:0048519	negative regulation of biological process	599	16.3975	1.2915821638732678E-5	[A2M, AATF, ABCA1, ABCA5, ABHD6, ACD, ACKR3, ACSL4, ACTN1, ACTN2, ACTN4, ADAMTS7, ADD2, ADM, ADRBK1, ADRBK2, AES, AGO1, AGO2, AIMP2, AKAP6, AMH, AMOT, ANAPC11, ANAPC15, ANKRD6, ANXA5, AP2A1, AP2S1, APC, APLN, APOC1, APOE, APOM, ARF1, ARHGAP24, ARHGAP4, ARHGAP6, ARHGDIA, ARHGEF1, ARID5A, ARRB2, ASPH, ASTN2, ATAD3A, ATCAY, ATF5, ATN1, ATP2B4, ATP7A, AURKAIP1, AXIN1, BAD, BAG3, BAHD1, BAI1, BAMBI, B…
GO:0048522	positive regulation of cellular process	611	16.3939	1.0349160157721336E-5	[AATF, ABCA1, ABHD14B, ABLIM1, ABLIM2, ACD, ACKR3, ACSL1, ACSL4, ACTN4, ACVR2A, ADAMTSL4, ADCY1, ADCY2, ADCY6, ADK, ADM, ADRBK1, AES, AGO2, AGPAT2, AGRN, AGTR1, AIMP2, AKAP12, AKAP5, AKAP6, ALK, AMH, AMOT, ANAPC11, ANK3, ANKRD6, AP1G1, AP3D1, APAF1, APC, APLN, APOC1, APOE, ARF1, ARFGAP1, ARHGAP4, ARHGAP6, ARHGDIA, ARHGEF10L, ARHGEF16, ARHGEF17, ARHGEF18, ARID3A, ARID5A, ARL2, ARMCX3, ARRB2, ASPH,…
GO:0048523	negative regulation of cellular process	556	16.6867	3.6642936760473146E-6	[AATF, ABCA1, ABCA5, ABHD6, ACD, ACKR3, ACTN1, ACTN2, ACTN4, ADAMTS7, ADD2, ADM, ADRBK1, ADRBK2, AES, AGO1, AGO2, AIMP2, AKAP6, AMH, ANAPC11, ANAPC15, ANKRD6, ANXA5, AP2A1, AP2S1, APC, APOC1, APOE, APOM, ARF1, ARHGAP24, ARHGAP4, ARHGAP6, ARHGDIA, ARHGEF1, ARID5A, ARRB2, ASPH, ASTN2, ATAD3A, ATCAY, ATF5, ATN1, ATP2B4, ATP7A, AURKAIP1, AXIN1, BAD, BAG3, BAHD1, BAI1, BAMBI, BAX, BCL3, BCL9L, BMP5, B…
GO:0048552	regulation of metalloenzyme activity	3	50	0.0411606	[ATP7A, CIB1, FGFR4]
GO:0048554	positive regulation of metalloenzyme activity	3	50	0.0411606	[ATP7A, CIB1, FGFR4]
GO:0048583	regulation of response to stimulus	516	16.3914	7.021821819727425E-5	[A2M, ABCA1, ABHD6, ACAP3, ACKR3, ACTB, ACTG1, ACVR2A, ADK, ADM, ADRBK1, ADRBK2, AES, AGAP3, AGO1, AGO2, AGPAT2, AGRN, AGTR1, AKAP12, AKAP5, AKAP6, AKR1C1, ALK, AMH, AMOT, ANKRD6, AP1B1, AP1G1, AP2A1, AP2S1, APAF1, APC, APOE, ARF1, ARFGAP1, ARHGAP19, ARHGAP23, ARHGAP24, ARHGAP33, ARHGAP39, ARHGAP4, ARHGAP44, ARHGAP6, ARHGDIA, ARHGEF1, ARHGEF10L, ARHGEF16, ARHGEF17, ARHGEF18, ARHGEF19, ARPC5, ARRB…
GO:0048584	positive regulation of response to stimulus	264	15.9517	0.0195894	[A2M, ACKR3, ACTB, ACTG1, ACVR2A, AGPAT2, AGTR1, AKAP12, AKAP5, AKAP6, AKR1C1, ALK, AMH, ANKRD6, AP1G1, APAF1, ARHGAP4, ARHGAP6, ARPC5, ARRB2, AXIN1, BAD, BAMBI, BAX, BCAR1, BCL2L14, BID, BMP5, BTN3A1, C1QBP, C1R, CACNB4, CACTIN, CANT1, CC2D1A, CDKN1C, CDKN2A, CFH, CFLAR, CHN1, CHN2, CIB1, CLU, CNOT6, CNPY3, CNR1, CRADD, CSF1, CTH, CTSC, CTSH, CTSL, DAPK3, DCC, DDX17, DDX5, DDX60, DISC1, DUSP6, D…
GO:0048585	negative regulation of response to stimulus	192	18.1303	1.5219740639749315E-4	[A2M, ACKR3, ADM, ADRBK1, ADRBK2, AES, AMH, ANKRD6, AP2A1, AP2S1, APC, APOE, ARHGAP24, ARHGEF1, ARRB2, AXIN1, BAMBI, BAX, BCL9L, BMP5, C1QBP, C1QTNF3, CACTIN, CARD8, CD109, CD276, CDK6, CFLAR, CHD8, CIB1, CISH, CLN3, CLTA, CLU, CNKSR3, CTH, CXXC1, DAB1, DDX39B, DEAF1, DGKZ, DLC1, DLK1, DUSP16, DUSP26, DUSP5, DUSP6, DUSP7, DUSP8, DVL1, EGFL7, EPHA2, EPN1, EYA1, F2RL1, FBN1, FBN2, FBXW7, FLCN, GLG1…
GO:0048588	developmental cell growth	30	27.2727	2.4855923204598646E-4	[AKAP6, APOE, ARHGAP4, CDKL5, CXXC1, DCC, DVL1, LIMK1, LMNB2, MAP1B, MEGF8, NDEL1, NELL1, NELL2, NLGN3, NTN1, RARG, RYK, SEMA3A, SEMA3F, SEMA7A, SLIT1, SLIT3, SMOX, SOX9, TNFRSF12A, TWF2, ULK1, WNT3, WNT5A]
GO:0048638	regulation of developmental growth	29	21.4815	0.0139699	[AGRN, AKAP6, APOE, ARHGAP4, CAPN3, CARM1, CDKL5, CXXC1, DCC, DUSP6, INSR, LIMK1, MAP1B, MEGF8, NDEL1, NELL1, NTN1, RYK, SEMA3A, SEMA3F, SEMA7A, SFRP1, SLIT1, SLIT3, TNFRSF12A, TWF2, ULK1, WNT3, WNT5A]
GO:0048639	positive regulation of developmental growth	16	30.7692	0.00172888	[AGRN, AKAP6, APOE, CAPN3, CDKL5, INSR, LIMK1, MAP1B, MEGF8, NDEL1, NELL1, NTN1, SEMA7A, TNFRSF12A, TWF2, WNT3]
GO:0048640	negative regulation of developmental growth	13	37.1429	6.505046204174211E-4	[ARHGAP4, CXXC1, DCC, NELL1, NTN1, RYK, SEMA3A, SEMA3F, SLIT1, SLIT3, ULK1, WNT3, WNT5A]
GO:0048642	negative regulation of skeletal muscle tissue development	4	50	0.0177442	[TSC22D3, TWIST1, USP19, USP2]
GO:0048646	anatomical structure formation involved in morphogenesis	156	16.0991	0.0488414	[ACKR3, ACTG1, ADAM12, ADM, AMOT, APAF1, ARHGAP24, ATP2B4, ATP6V0D1, ATP7A, AXIN1, B9D2, BAI1, BAX, BTG1, CAPN3, CASC5, CEP89, CFLAR, CIB1, CNOT3, COL18A1, CTSH, DEAF1, DICER1, DLC1, DUSP5, DUSP6, DVL1, DVL3, E2F4, E2F7, E2F8, ECSIT, EDN1, EGFL7, EHD1, EHD2, EPB41L3, EPHA2, EPHB2, EPHB3, EYA1, FBF1, FBN2, FGFR4, FHOD3, FLNA, FOXB1, FUZ, FZD3, FZD9, GATAD2A, GJA5, GLI2, GNA13, GPI, GPR56, GPX1, HD…
GO:0048666	neuron development	181	18.8738	2.4803860510291288E-5	[ABLIM1, ABLIM2, ACSL4, ACTB, ACTG1, ADCY1, ADM, AGRN, ALK, ANK3, AP2A1, AP2S1, APC, APOE, ARHGAP39, ARHGAP4, ARHGDIA, ARHGEF1, ARX, ATCAY, ATF5, ATP2B4, ATP7A, BAI1, BLOC1S2, BMP5, BRSK1, CACNB2, CACNB4, CDKL5, CDKN1C, CHN1, CIB1, CLMN, CLTA, CNR1, CNTNAP2, COL5A1, COL9A1, CXXC1, DAB1, DBN1, DCC, DICER1, DISC1, DPYSL5, DVL1, EFHD1, EFNA2, EHD1, EPB41L3, EPHA7, EPHB2, EPHB3, ETV1, FLOT1, FOXB1, F…
GO:0048667	cell morphogenesis involved in neuron differentiation	125	19.4401	1.2655606360237936E-4	[ABLIM1, ABLIM2, ACTB, ACTG1, ADCY1, AGRN, ANK3, AP2A1, AP2S1, APC, APOE, ARHGAP39, ARHGAP4, ARHGDIA, ARHGEF1, ARX, ATP2B4, ATP7A, BAI1, BRSK1, CACNB2, CACNB4, CDKL5, CHN1, CLTA, COL5A1, COL9A1, CXXC1, DAB1, DCC, DPYSL5, DVL1, EFNA2, EPHA7, EPHB2, EPHB3, ETV1, FLOT1, FOXB1, FZD3, FZD9, GLI2, ITGA5, ITGB3, KIAA1598, LIMK1, LLGL1, LMNB2, LRP8, LRRC4C, LRRK2, MAP1B, MAP2K2, MAPK3, MAPK8IP3, MEGF8, M…
GO:0048675	axon extension	25	30.8642	9.607693188494796E-5	[APOE, ARHGAP4, CDKL5, DVL1, LIMK1, LMNB2, MAP1B, MEGF8, NDEL1, NELL1, NELL2, NLGN3, NTN1, RYK, SEMA3A, SEMA3F, SEMA7A, SLIT1, SLIT3, SMOX, TNFRSF12A, TWF2, ULK1, WNT3, WNT5A]
GO:0048699	generation of neurons	228	17.7708	1.3023507730046768E-4	[ABLIM1, ABLIM2, ACSL4, ACTB, ACTG1, ADCY1, ADM, AGRN, ALK, ANK3, AP2A1, AP2S1, APC, APOE, ARHGAP39, ARHGAP4, ARHGDIA, ARHGEF1, ARX, ASTN1, ATCAY, ATF5, ATP2B4, ATP7A, AXIN1, BAI1, BAX, BLOC1S2, BMP5, BRSK1, CACNB2, CACNB4, CDK6, CDKL5, CDKN1C, CHN1, CIB1, CLMN, CLTA, CNOT6, CNR1, CNTNAP2, COL5A1, COL9A1, CXXC1, DAB1, DAGLA, DAPK3, DBN1, DCC, DICER1, DISC1, DNER, DPYSL5, DVL1, EFHD1, EFNA2, EHD1,…
GO:0048731	system development	625	15.7988	6.444125380151556E-4	[ABLIM1, ABLIM2, ACD, ACKR3, ACSBG1, ACSL4, ACTB, ACTG1, ACVR2A, ADAM19, ADAMTS4, ADAMTS7, ADCY1, ADD2, ADM, ADRBK1, AEBP1, AES, AGPAT2, AGRN, AGTR1, AIMP2, AK4, AKAP6, ALDOC, ALK, AMH, AMOT, ANK3, ANKRD6, AP2A1, AP2S1, AP3D1, APAF1, APBA2, APC, APLN, APOE, APRT, ARHGAP24, ARHGAP39, ARHGAP4, ARHGDIA, ARHGEF1, ARID5A, ARRB2, ARSA, ARX, ASTN1, ATCAY, ATF5, ATIC, ATN1, ATOH8, ATP2B4, ATP6V0D1, ATP7A…
GO:0048812	neuron projection morphogenesis	129	19.7853	4.361665692748017E-5	[ABLIM1, ABLIM2, ACTB, ACTG1, ADCY1, AGRN, ANK3, AP2A1, AP2S1, APC, APOE, ARHGAP39, ARHGAP4, ARHGDIA, ARHGEF1, ARX, ATP7A, BAI1, BRSK1, CACNB2, CACNB4, CDKL5, CHN1, CLTA, COL5A1, COL9A1, CXXC1, DAB1, DCC, DICER1, DPYSL5, DVL1, EFNA2, EPB41L3, EPHA7, EPHB2, EPHB3, ETV1, FLOT1, FOXB1, FZD3, FZD9, GLI2, ITGA5, ITGB3, KIAA1598, LIMK1, LLGL1, LMNB2, LRP8, LRRC4C, LRRK2, MAP1B, MAP1S, MAP2K2, MAPK3, MA…
GO:0048841	regulation of axon extension involved in axon guidance	9	52.9412	1.9352436300785423E-4	[MEGF8, NELL1, RYK, SEMA3A, SEMA3F, SLIT1, SLIT3, WNT3, WNT5A]
GO:0048843	negative regulation of axon extension involved in axon guidance	8	66.6667	4.807854292407601E-5	[NELL1, RYK, SEMA3A, SEMA3F, SLIT1, SLIT3, WNT3, WNT5A]
GO:0048846	axon extension involved in axon guidance	11	36.6667	0.00189473	[MEGF8, NELL1, NELL2, RYK, SEMA3A, SEMA3F, SLIT1, SLIT3, SMOX, WNT3, WNT5A]
GO:0048852	diencephalon morphogenesis	3	50	0.0411606	[OTX1, SOX2, WNT5A]
GO:0048853	forebrain morphogenesis	7	36.8421	0.0122982	[OTX1, PTEN, SLIT1, SLIT3, SMOX, SOX2, WNT5A]
GO:0048854	brain morphogenesis	10	30.303	0.0136489	[OTX1, PCNT, PTEN, SHANK3, SLIT1, SLIT3, SMOX, SOX2, SPEF2, WNT5A]
GO:0048858	cell projection morphogenesis	159	19.8999	4.041546689899597E-6	[ABLIM1, ABLIM2, ACTB, ACTG1, ADCY1, AGRN, ANK3, AP2A1, AP2S1, APC, APOE, ARHGAP39, ARHGAP4, ARHGDIA, ARHGEF1, ARX, ATP6V0D1, ATP7A, B9D2, BAI1, BRSK1, C21orf2, C5orf30, CACNB2, CACNB4, CDKL5, CEP89, CHN1, CLTA, COL5A1, COL9A1, CORO1B, CXXC1, DAB1, DCC, DICER1, DPYSL5, DVL1, E2F4, EFNA2, EPB41L3, EPHA7, EPHB2, EPHB3, ETV1, FBF1, FLNA, FLOT1, FOXB1, FUZ, FZD3, FZD9, GLI2, IFT80, ITGA5, ITGB3, KANK…
GO:0048869	cellular developmental process	561	16.5097	1.236360520416137E-5	[A2M, ABCA1, ABCA5, ABLIM1, ABLIM2, ACD, ACKR3, ACSL4, ACTB, ACTG1, ACVR2A, ADAM12, ADAMTS7, ADCY1, ADM, AGRN, AGTR1, AIMP2, AKAP6, AKIP1, AKR1C1, ALDOA, ALDOC, ALK, AMH, AMOT, ANK3, AP2A1, AP2S1, AP3D1, APC, APOE, ARHGAP24, ARHGAP39, ARHGAP4, ARHGDIA, ARHGEF1, ARHGEF18, ARID5A, ARX, ASTN1, ATCAY, ATF5, ATOH8, ATP2B4, ATP6V0D1, ATP7A, AXIN1, B9D2, BAD, BAI1, BAMBI, BAX, BCL3, BCL9L, BDH2, BEX1, B…
GO:0048870	cell motility	189	16.9964	0.00409524	[ABHD6, AGTR1, AMOT, APC, APOE, ARHGAP24, ARHGAP4, ARHGEF16, ARRB2, ARX, ASTN1, ATN1, ATP1B1, ATP1B3, BAMBI, BAX, BCAR1, BMP5, BSG, BTG1, C1QBP, CABYR, CD151, CD248, CDK6, CDKL5, CIB1, CNN2, CNOT6, COL18A1, COL5A1, CORO1A, CORO1B, CSF1, CTSH, CXXC1, DAB1, DAPK3, DCC, DDR1, DEAF1, DGKZ, DHX34, DISC1, DLC1, DNAH1, DNAH5, DNER, EDN1, EGFL7, ENC1, EPHA2, EPHB3, F11R, F2R, F2RL1, FGFR4, FLCN, FOXB1, F…
GO:0048872	homeostasis of number of cells	41	18.894	0.0333811	[ACVR2A, AMH, BAX, CDK6, CFH, CHST3, CORO1A, CSF1, DNASE2, F2R, FANCC, FASN, FECH, FLVCR1, G6PD, GAS2L1, ISG15, JAK3, KIT, KITLG, KMT2E, LDB2, LIPA, MAEA, MEN1, MIF, RAG1, RB1, SENP1, SIVA1, SLC40A1, SMAD5, SMARCA4, SOX6, SOX9, SRF, STAT5A, TIMP1, TNFAIP3, TSC22D3, ZFPM1]
GO:0050650	chondroitin sulfate proteoglycan biosynthetic process	13	46.4286	4.353959550036656E-5	[B3GALT6, B3GAT3, CHPF, CHST12, CHST15, CHST3, CHST7, CHST9, CHSY3, CSGALNACT1, NCAN, SLC35D1, XYLT2]
GO:0050651	dermatan sulfate proteoglycan biosynthetic process	6	40	0.0130434	[B3GAT3, CHST12, CHST14, CSGALNACT1, DSEL, NCAN]
GO:0050654	chondroitin sulfate proteoglycan metabolic process	19	31.1475	5.626614678663493E-4	[AGRN, B3GALT6, B3GAT3, CHPF, CHST12, CHST14, CHST15, CHST3, CHST7, CHST9, CHSY3, CSGALNACT1, DSEL, HSPG2, NCAN, SDC2, SLC35D1, SPOCK2, XYLT2]
GO:0050655	dermatan sulfate proteoglycan metabolic process	6	37.5	0.0184017	[B3GAT3, CHST12, CHST14, CSGALNACT1, DSEL, NCAN]
GO:0050667	homocysteine metabolic process	5	45.4545	0.0127092	[CBS, COMT, CPS1, CTH, NOX4]
GO:0050767	regulation of neurogenesis	95	18.7377	0.00257836	[APOE, ARHGAP4, ARHGDIA, ARHGEF1, ATF5, BMP5, CDKL5, CHN1, CIB1, CNR1, CXXC1, DAB1, DBN1, DCC, DICER1, DISC1, DVL1, EPHB2, EPHB3, EYA1, FAM58A, GLI2, GPR56, HMG20B, HMGA2, ID4, KANK1, KATNB1, KIT, LIMK1, LPAR1, LRP8, LRRC4C, LRRK2, MAGI2, MAN2A1, MAP1B, MAPK8IP3, MEGF8, METRN, MIB1, NBL1, NCS1, NDEL1, NELL1, NLGN3, NOTCH3, NOTCH4, NREP, NSMF, NTN1, NTRK2, NUMBL, OBSL1, PTEN, PTPRO, RAPGEF1, RAPGE…
GO:0050768	negative regulation of neurogenesis	26	23.6364	0.00552941	[ARHGAP4, ARHGDIA, ARHGEF1, ATF5, CXXC1, DAB1, DCC, DICER1, EPHB2, HMGA2, ID4, NELL1, NTN1, PTEN, RAPGEF2, RTN4R, RYK, SEMA3A, SEMA3F, SLIT1, SLIT3, SOX11, TSPO, ULK1, WNT3, WNT5A]
GO:0050769	positive regulation of neurogenesis	35	23.8095	0.00126123	[APOE, ARHGDIA, CDKL5, DICER1, DISC1, EPHB2, FAM58A, KIT, LIMK1, MAN2A1, MAP1B, MEGF8, METRN, NDEL1, NELL1, NTN1, NTRK2, NUMBL, OBSL1, RELA, RGS14, SEMA7A, SHANK3, SMOX, SOX11, SOX2, STK11, STK25, TENM4, TNFRSF12A, TSPO, TWF2, VEGFC, WNT3, XRCC4]
GO:0050770	regulation of axonogenesis	36	29.2683	1.1888887948656057E-5	[APOE, ARHGAP4, ARHGDIA, ARHGEF1, CDKL5, CHN1, CXXC1, DAB1, DCC, EPHB2, EPHB3, LIMK1, LRRC4C, MAP1B, MEGF8, METRN, NDEL1, NELL1, NTN1, NTRK2, PTEN, PTPRO, RTN4R, RYK, SEMA3A, SEMA3F, SEMA7A, SLIT1, SLIT3, STK11, STK25, TNFRSF12A, TWF2, ULK1, WNT3, WNT5A]
GO:0050771	negative regulation of axonogenesis	19	35.1852	9.36397596051498E-5	[ARHGAP4, ARHGDIA, ARHGEF1, CXXC1, DAB1, DCC, EPHB2, NELL1, NTN1, PTEN, RTN4R, RYK, SEMA3A, SEMA3F, SLIT1, SLIT3, ULK1, WNT3, WNT5A]
GO:0050772	positive regulation of axonogenesis	17	33.3333	4.504879942031323E-4	[APOE, ARHGDIA, CDKL5, LIMK1, MAP1B, MEGF8, METRN, NDEL1, NELL1, NTN1, NTRK2, SEMA7A, STK11, STK25, TNFRSF12A, TWF2, WNT3]
GO:0050790	regulation of catalytic activity	304	16.5397	0.00166133	[A2M, ACAP3, ACD, ACSL1, ACVR2A, ADCY1, ADCY2, ADCY6, ADRBK1, ADRM1, AGAP3, AGRN, AGTR1, AHSA1, AKAP6, ALK, AMH, AMOT, ANAPC11, ANXA5, APAF1, APBA3, APC, APOC1, APOE, ARFGAP1, ARHGAP24, ARHGAP6, ARHGDIA, ARHGEF1, ARHGEF10L, ARHGEF16, ARHGEF17, ARHGEF18, ARHGEF19, ARL2, ARRB2, ASPH, ATP6V0D1, ATP7A, AURKAIP1, AXIN1, BAD, BAX, BCL2L12, BCL2L13, BID, BOK, BVES, CAPN3, CARD10, CARD8, CASC5, CBS, CCNB…
GO:0050793	regulation of developmental process	297	16.7042	0.00102226	[ABCA1, ABCA5, ACVR2A, ADAMTS7, ADM, AGRN, AGTR1, AKAP6, ALDOA, AMH, AMOT, ANKRD6, AP3D1, APC, APOE, ARHGAP4, ARHGDIA, ARHGEF1, ARHGEF18, ATF5, AXIN1, BAD, BAI1, BAMBI, BAX, BCL9L, BMP5, BTG1, BVES, C14orf169, C1QBP, C21orf2, CAPN3, CARM1, CD276, CDC42EP1, CDK6, CDKL5, CDKN2A, CFLAR, CHN1, CIB1, CNOT3, CNR1, COCH, CORO1A, CORO1B, CSF1, CST3, CTSH, CXXC1, DAB1, DBN1, DCC, DDX17, DDX5, DEAF1, DHODH…
GO:0050794	regulation of cellular process	1327	15.2092	3.992162524490987E-5	[A2M, AATF, ABCA1, ABCA2, ABCA5, ABHD14B, ABHD6, ABLIM1, ABLIM2, ACAP3, ACD, ACKR3, ACSL1, ACSL4, ACTB, ACTG1, ACTN1, ACTN2, ACTN4, ACVR2A, ADAM11, ADAM12, ADAMTS7, ADAMTSL4, ADC, ADCY1, ADCY2, ADCY6, ADD2, ADK, ADM, ADRBK1, ADRBK2, AES, AGAP3, AGO1, AGO2, AGPAT2, AGRN, AGTR1, AHSA1, AIMP2, AKAP12, AKAP17A, AKAP3, AKAP5, AKAP6, AKAP9, AKR1C1, ALDOA, ALK, AMH, AMOT, ANAPC11, ANAPC15, ANK3, ANKDD1A…
GO:0050804	regulation of synaptic transmission	44	19.2982	0.0203659	[ABHD6, APOE, ARF1, ARRB2, ATP2B4, CNR1, DBN1, DHX34, EDN1, EPHB2, FAM58A, GIPC1, GNAI2, GPM6B, GRIK5, GRM3, ITPR3, JPH4, KCNJ10, KIT, LLGL1, LRP8, NANOS1, NCDN, NLGN3, NOL3, NSMF, NTRK2, PICK1, PLA2G6, PLK2, PRKCA, PTEN, RAB3A, RAPGEF2, RGS14, SH2D3C, SHANK3, SLC30A1, SNCA, SNCAIP, SRF, SYP, UNC13A]
GO:0050808	synapse organization	39	22.2857	0.002541	[AGRN, ANK3, ATP2B4, CACNB2, CACNB4, DISC1, DNER, DNM3, DVL1, ELFN1, EPHB2, EPHB3, F2R, LLGL1, LMNB2, LRRC4B, LRRK2, LRRTM2, MYO5A, NCAN, NLGN3, NLGN4Y, NRXN2, NTRK2, PAK3, PCDHB10, PTEN, PVRL1, RAB3A, SEZ6L2, SH2D3C, SHANK3, SLIT1, SLIT3, SNCA, SPOCK2, SPTBN2, UNC13A, WNT5A]
GO:0050817	coagulation	96	17.1123	0.0290111	[A2M, ACTB, ACTN1, ACTN2, ACTN4, AK4, AKAP1, ALDOA, ANXA5, APOE, ARRB2, ATP1B1, ATP1B3, ATP2B4, BCAR1, BSG, C1QBP, CAPZA2, CBX5, CLU, DAGLA, DEAF1, DGKQ, DGKZ, EDN1, EFEMP2, EHD1, EHD2, ENPP4, F11R, F2R, F2RL1, F8, FLNA, GLG1, GNA11, GNA13, GNAI2, GNG2, GP1BB, GRB14, GUCY1B3, HMG20B, HPS6, HS3ST5, ITGA5, ITGB3, ITPK1, ITPR3, KCNMB1, KIF3A, KIF9, KIFAP3, LMAN1, LRP8, LRRC16A, MAFF, MAFG, MAPK3, MM…
GO:0050821	protein stabilization	19	21.5909	0.0390423	[BAG3, CDKN2A, CLU, CRTAP, FBXW7, FLNA, HCFC1, MDM4, PML, PPAP2B, PRKCD, PTEN, SMOX, TCF3, TNIP2, USP2, WFS1, WIZ, ZBED3]
GO:0050878	regulation of body fluid levels	119	17.0977	0.0169881	[A2M, ACTB, ACTN1, ACTN2, ACTN4, AK4, AKAP1, ALDOA, ANXA5, APLN, APOE, APRT, ARRB2, ATP1B1, ATP1B3, ATP2B4, ATP7A, BCAR1, BSG, C1QBP, CAPZA2, CBX5, CLU, COASY, CYBA, DAGLA, DDR1, DEAF1, DGKQ, DGKZ, DHODH, EDN1, EFEMP2, EHD1, EHD2, ENPP4, EPHB2, F11R, F2R, F2RL1, F8, FLNA, FOXB1, GJA5, GLG1, GNA11, GNA13, GNAI2, GNG2, GP1BB, GPI, GRB14, GUCY1B3, HAS2, HMG20B, HPS6, HSD11B2, HYAL2, ITGA5, ITGB3, IT…
GO:0050919	negative chemotaxis	6	46.1538	0.0057601	[EPHA7, NELL2, RYK, SLIT1, SLIT3, WNT5A]
GO:0050920	regulation of chemotaxis	26	19.8473	0.0470017	[C1QBP, CNOT6, EDN1, F2RL1, HSPB1, LPAR1, MEGF8, MEN1, MPP1, NBL1, NELL1, PDGFB, PPM1F, PRKCA, PTPRO, RYK, SEMA3A, SEMA3F, SLIT1, SLIT3, THBS4, VEGFB, VEGFC, WNT3, WNT5A, ZNF580]
GO:0050922	negative regulation of chemotaxis	9	31.0345	0.0161104	[NBL1, NELL1, RYK, SEMA3A, SEMA3F, SLIT1, SLIT3, WNT3, WNT5A]
GO:0050982	detection of mechanical stimulus	10	25	0.0496247	[ASIC3, ATP2B4, COL11A1, DENND5B, GPR98, JUP, KIT, PIEZO1, PKD1, SOX2]
GO:0051013	microtubule severing	4	50	0.0177442	[KATNAL1, KATNAL2, KATNB1, TTLL11]
GO:0051017	actin filament bundle assembly	24	24.2424	0.00536982	[ACTN1, ACTN4, ADD2, AMOT, ARHGAP6, ARHGEF10L, CORO1B, DLC1, FHOD1, FSCN1, LIMK1, LRRC16A, MYO1B, NF2, NOX4, PFN1, PPM1F, SFRP1, SHANK3, SHROOM2, SORBS3, SRF, TNFAIP1, TPM1]
GO:0051049	regulation of transport	198	15.8781	0.0464436	[ABCA1, ABCA2, ACSL4, ACTN2, ACTN4, ADRBK1, AGTR1, AKAP5, AKAP6, AMH, ANK3, AP1G1, AP2S1, APLN, APOC1, APOE, ARF1, ARRB2, ASPH, ASPSCR1, ATP2B4, AXIN1, BAD, BAMBI, BAX, BCL3, BID, C1QTNF3, CACNA1B, CACNB2, CACNB4, CACNG8, CAPN10, CAPN3, CARD8, CDKN2A, CFH, CHERP, CIB1, CNIH2, CNKSR3, CNN2, CNR1, EDN1, EHD1, EHD2, EMD, F2R, F2RL1, FGF12, FGF14, FLNA, GJA5, GNAI2, GNAO1, GOPC, GPD1L, GPM6B, GRIK5, …
GO:0051051	negative regulation of transport	61	17.6301	0.0426637	[ACSL4, ACTN2, APOC1, C1QTNF3, CNN2, CNR1, EDN1, EMD, F2R, F2RL1, FGF12, FLNA, GNAO1, GOPC, GPM6B, GSTM2, IRS1, ITGB3, KCNH2, LATS1, LITAF, LLGL1, MAP1B, MAPK7, MDFI, NANOS1, NDFIP1, NEDD4L, NFKB1, NFKBIA, NFKBIE, NFKBIL1, NOS3, NR1H2, PARP10, PIM3, PKD1, PKDCC, PKIA, PLA2R1, PRKCA, PTEN, RHBDF1, RHBDF2, SFRP1, SIRT4, SLC30A1, SLC9A3R1, SNCA, SREBF1, SSC5D, SYTL4, TIMP1, TNFRSF21, TONSL, TRIP6, T…
GO:0051056	regulation of small GTPase mediated signal transduction	93	21.5278	2.0181997746010478E-5	[A2M, ABCA1, ACAP3, AGAP3, AGRN, AMOT, APOE, ARFGAP1, ARHGAP19, ARHGAP23, ARHGAP24, ARHGAP33, ARHGAP39, ARHGAP4, ARHGAP44, ARHGAP6, ARHGDIA, ARHGEF1, ARHGEF10L, ARHGEF16, ARHGEF17, ARHGEF18, ARHGEF19, BVES, CDKL5, CHN1, CHN2, CSF1, DENND3, DENND4A, DENND4B, DENND5B, DGKZ, DLC1, EPHA2, EPHB3, F2R, F2RL1, FAM13B, FGD3, FLCN, FLOT1, GIT1, GPR56, KALRN, KANK1, KITLG, LLGL1, LPAR1, MLST8, MYO9B, NDEL1…
GO:0051090	regulation of sequence-specific DNA binding transcription factor activity	74	19.9461	0.00139963	[ALK, AMH, ARRB2, BEX1, BEX2, BRMS1, CACTIN, CAPN3, CDKN2A, CFLAR, CIB1, CLU, CRTC1, CTH, ERC1, FLNA, FOXB1, FZD4, GLIS2, HMGA2, ID3, JMY, JUP, KIT, LONP1, LRP6, LRP8, MALT1, MAPK3, MEN1, MYD88, NFKB1, NFKB2, NFKBIA, NFKBIB, NFKBIL1, PARP10, PEX14, PIAS4, PIDD, PPAP2B, PTEN, RB1, RBCK1, RELA, RLIM, RNF31, RPS6KA4, SGK3, SIK1, SIVA1, SMARCA4, SMOX, SRF, TAF6, TAF6L, TCEAL7, TCF3, TICAM1, TLR9, TNF…
GO:0051091	positive regulation of sequence-specific DNA binding transcription factor activity	45	20.0893	0.00963737	[ALK, AMH, BEX1, BEX2, CAPN3, CFLAR, CIB1, CLU, CRTC1, CTH, ERC1, FZD4, HMGA2, JMY, JUP, KIT, LRP6, LRP8, MALT1, MYD88, NFKB1, NFKB2, NFKBIA, NFKBIB, PIDD, PPAP2B, PTEN, RBCK1, RELA, RNF31, RPS6KA4, SMARCA4, SMOX, SRF, TCF3, TICAM1, TLR9, TRAF2, TRIM14, TRIM22, TRIM62, TRIM8, TSSK6, WNT5A, ZIC2]
GO:0051092	positive regulation of NF-kappaB transcription factor activity	27	20.3008	0.0339048	[ALK, AMH, CAPN3, CFLAR, CIB1, CLU, CTH, ERC1, MALT1, MYD88, NFKB1, NFKB2, NFKBIA, NFKBIB, PIDD, RBCK1, RELA, RNF31, RPS6KA4, TICAM1, TLR9, TRAF2, TRIM14, TRIM22, TRIM62, TRIM8, WNT5A]
GO:0051094	positive regulation of developmental process	141	16.9268	0.0139157	[ACVR2A, ADM, AGRN, AGTR1, AKAP6, AMOT, AP3D1, APC, APOE, ARHGDIA, BAD, BAMBI, BAX, BCL9L, BMP5, BTG1, C1QBP, CAPN3, CARM1, CD276, CDKL5, CDKN2A, CIB1, CORO1B, CSF1, CTSH, DAB1, DICER1, DISC1, EDN1, EHD1, EHD2, EPHB2, EPHB3, FAM58A, FBN2, FGFR4, FLT3LG, GCNT2, GLI2, GLIPR2, GPM6B, HDAC7, HIF1AN, HMG20B, HMGA1, HMGA2, HSPB1, ID4, IFITM1, IL4R, INSR, ISG15, JUNB, JUND, JUP, KIT, KITLG, KMT2E, LIMK1…
GO:0051098	regulation of binding	43	20.4762	0.00802839	[ACD, ADD2, AES, ARRB2, BAMBI, BAX, BCL3, CARM1, CYP2D6, DOT1L, DVL1, HMGA2, IFIT1, IFIT2, LDLRAP1, MAPK3, MDFI, MED25, MEN1, MMAB, NELL1, NFKBIA, PCBD1, PEX14, PKD1, PRKCA, PRKCD, PRMT7, RAPGEF2, RFNG, RUNX1T1, SMARCA4, SMOX, SOX11, TDG, TEX14, TICAM1, TRAF2, TWIST1, ZFP90, ZFPM1, ZNF268, ZNF675]
GO:0051100	negative regulation of binding	21	23.8636	0.0106124	[AES, ARRB2, BAX, CARM1, CYP2D6, DVL1, HMGA2, IFIT1, IFIT2, MAPK3, MDFI, NFKBIA, PEX14, PRKCD, SMOX, SOX11, TDG, TEX14, ZFP90, ZFPM1, ZNF675]
GO:0051126	negative regulation of actin nucleation	3	75	0.0102844	[CORO1A, CORO1B, PICK1]
GO:0051128	regulation of cellular component organization	288	17.7668	1.588823621479107E-5	[ACD, ACSL4, ACTN4, ADD2, AGRN, AGTR1, AKAP6, ALDOA, AMOT, ANAPC11, ANAPC15, ANK3, AP2S1, APC, APOC1, APOE, ARF1, ARHGAP24, ARHGAP4, ARHGAP6, ARHGDIA, ARHGEF1, ARHGEF10L, ARHGEF16, ARHGEF18, ARHGEF19, ARID5A, ARL2, ARPC1B, ARPC5, ARRB2, ASPH, AURKAIP1, BAD, BAIAP2L2, BAMBI, BAX, BCAR1, BCL9L, BID, BMP5, BTG1, BVES, C1QBP, C21orf2, CAPZA2, CD320, CDC42EP1, CDK9, CDKL5, CDKN2A, CDKN2C, CFH, CFLAR, …
GO:0051129	negative regulation of cellular component organization	85	18.4382	0.00649268	[ACD, ADD2, ANAPC11, ANAPC15, APC, APOC1, ARHGAP24, ARHGAP4, ARHGAP6, ARHGDIA, ARHGEF1, AURKAIP1, BMP5, CAPZA2, CFLAR, CIB1, CLU, CNN2, CORO1A, CORO1B, CST3, CTBP1, CXXC1, DAB1, DCC, DLC1, EIF4EBP1, EPHB2, FBXO43, FHOD3, FLCN, GAS2L1, GOPC, GPX1, IER3, KANK1, KATNB1, LLGL1, LPAR1, LRRC16A, MAD1L1, MALSU1, MID1IP1, MYADM, NELL1, NOC2L, NR1H2, NTN1, NUBP2, PEX14, PFN1, PICK1, PKDCC, PLEKHH2, PML, P…
GO:0051130	positive regulation of cellular component organization	121	17.8203	0.00446327	[ACTN4, AGRN, AMOT, APC, APOE, ARF1, ARHGDIA, ARHGEF10L, ARHGEF16, ARID5A, ARL2, ARRB2, BAD, BAMBI, BAX, BCL9L, BID, BMP5, C1QBP, CDC42EP1, CDKL5, CIB1, CNOT6, CNR1, CORO1A, CORO1B, CTBP1, DCC, DVL1, EDN1, EHD1, EHD2, EPHA2, EPHB2, EPHB3, F2RL1, FASN, FHOD1, GCNT2, GLIPR2, INSR, JMY, KATNB1, KIAA1324, KIF3A, KIT, LDLRAP1, LIMK1, LMAN1, LRP8, LRRC16A, LRRC4B, MAGI2, MAP1B, MAPK3, MARCH5, MED25, ME…
GO:0051171	regulation of nitrogen compound metabolic process	618	15.4	0.00767917	[AATF, ABCA1, ABCA2, ABHD14B, ABLIM1, ABLIM2, ACAP3, ACD, ACVR2A, ADM, AES, AGAP3, AGO1, AGO2, AGRN, AHSA1, AKAP12, AKAP17A, AKAP5, AKAP6, ALK, AMH, AMOT, ANP32A, AP2A1, APC, APOC1, APOE, ARFGAP1, ARHGAP24, ARHGAP6, ARHGEF1, ARHGEF10L, ARHGEF16, ARHGEF17, ARHGEF18, ARHGEF19, ARID3A, ARID5A, ARL2, ARMCX3, ARRB2, ASCC2, ASCC3, ASPH, ATCAY, ATF5, ATN1, ATOH8, ATP6V0D1, ATRX, AURKAIP1, AXIN1, BAHD1, …
GO:0051174	regulation of phosphorus metabolic process	270	16.1098	0.0116648	[ABCA1, ACAP3, ACD, ACKR3, ACSL1, ACVR2A, ADCY1, ADCY2, ADCY6, ADM, AGAP3, AGRN, AHSA1, AKAP12, AKAP5, AKAP6, ALK, AMH, AMOT, ANKRD6, APC, APLN, APOC1, APOE, ARFGAP1, ARHGAP24, ARHGAP6, ARHGEF1, ARHGEF10L, ARHGEF16, ARHGEF17, ARHGEF18, ARHGEF19, ARL2, ARRB2, ATP6V0D1, ATP7A, AXIN1, BAD, BAX, BMP5, BVES, CACTIN, CARD10, CASC5, CBS, CCNB3, CCND3, CDC25B, CDC37, CDKL5, CDKN1C, CDKN2A, CDKN2C, CHN1, …
GO:0051180	vitamin transport	8	29.6296	0.0299537	[CUBN, MIF, PDPN, SLC19A1, SLC25A32, SLC52A2, STRA6, TCN2]
GO:0051186	cofactor metabolic process	51	18.1495	0.0381681	[ACOT2, ACOT7, ACSL1, ACSL4, ACSS1, AKR1C1, AKR7A2, ATIC, BDH2, BLVRA, CBR1, CBR4, COASY, COQ2, COQ3, DCAKD, FAM3A, FASN, FECH, FLAD1, FPGS, G6PD, GPD1L, H6PD, HSD17B12, IBA57, MCCC2, MDH2, MVK, NADK2, NAPRT1, NMNAT1, NUDT7, PANK2, PCBD1, PDK3, PDXP, PGAM1, PGLS, PNP, PPCS, QPRT, SLC19A1, SLC25A1, SLC25A32, SLC25A39, SNCA, SPR, THTPA, TKT, TSPO]
GO:0051188	cofactor biosynthetic process	30	20.5479	0.0227217	[ACOT7, ACSL1, ACSL4, ACSS1, ATIC, BDH2, COASY, COQ2, COQ3, DCAKD, FAM3A, FASN, FECH, FLAD1, HSD17B12, IBA57, NADK2, NAPRT1, NMNAT1, PANK2, PCBD1, PDK3, PNP, PPCS, QPRT, SLC25A1, SLC25A39, SNCA, SPR, TSPO]
GO:0051216	cartilage development	36	18.9474	0.042326	[ADAMTS7, ARID5A, ATP7A, BMP5, CARM1, CBS, COL11A1, COL9A1, CSGALNACT1, EDN1, ESRRA, GLG1, GLI2, HMGA2, HSPG2, HYAL2, IFT80, LOXL2, LRP6, LTBP3, MAPK3, NKX3-2, OSR2, PKD1, PKDCC, PRKCA, RARB, RARG, RELA, RORA, SMAD5, SOX6, SOX9, SULF1, WNT5A, WNT9A]
GO:0051220	cytoplasmic sequestering of protein	11	39.2857	9.777699466485136E-4	[FLNA, GOPC, LATS1, MDFI, NFKBIA, NFKBIE, NFKBIL1, PKD1, TONSL, TRIP6, ZNF268]
GO:0051224	negative regulation of protein transport	27	20.7692	0.0260121	[C1QTNF3, EMD, F2R, F2RL1, FLNA, GOPC, LATS1, LITAF, MAPK7, MDFI, NDFIP1, NFKBIA, NFKBIE, NFKBIL1, PARP10, PKD1, PKDCC, PKIA, RHBDF1, RHBDF2, SSC5D, TNFRSF21, TONSL, TRIP6, UACA, WWP2, ZNF268]
GO:0051235	maintenance of location	61	21.8638	3.3114734380544294E-4	[ABCA1, AKAP6, ALKBH7, ANK3, AP3D1, APC, APOE, ARL2, ASPH, BAX, BCL3, BSCL2, CAPN3, CASC5, CHERP, DBN1, EHD1, EPB41L3, F2R, FBN1, FBN2, FBXW7, FITM2, FLNA, GOPC, GPAA1, GRIK5, GSTM2, ITGB3, JUP, LATS1, LPL, MDFI, MEST, NBL1, NFKB1, NFKBIA, NFKBIE, NFKBIL1, NR1H2, PEX14, PIP5K1C, PKD1, PML, PNPLA2, POLR2M, PRKCA, RB1, SCARB1, SLC30A4, SLC8A1, SNCA, STAT5A, TEX14, TLN1, TONSL, TRIP6, TWF2, UBASH3B,…
GO:0051239	regulation of multicellular organismal process	333	15.767	0.0168972	[ACVR2A, ADAMTS7, ADK, ADM, ADRBK1, AGPAT2, AGRN, AGTR1, AKAP6, AMH, AMOT, ANKRD6, ANXA5, AP3D1, APC, APLN, APOC1, APOE, ARHGAP4, ARHGDIA, ARHGEF1, ARRB2, ARX, ASPH, ATF5, BAD, BAI1, BAMBI, BAX, BCAR1, BCL3, BCL9L, BMP5, BTG1, C14orf169, C1QBP, C1QTNF3, CACNA1B, CACTIN, CAPN3, CARD8, CARM1, CD276, CDK6, CDKL5, CDKN2A, CHN1, CIB1, CNN1, CNOT3, CNR1, CPS1, CSF1, CST3, CTSH, CXXC1, CYBA, DAB1, DAPK3…
GO:0051246	regulation of protein metabolic process	287	16.5227	0.0023923	[A2M, AATF, ACD, ACSL1, ACVR2A, ADCY1, ADCY2, ADCY6, AGO1, AGO2, AGTR1, AIMP2, AKR1C1, ALK, AMH, ANAPC11, APC, APOE, APOM, ARFGAP1, ARID5A, ARRB2, ASPH, ATP2B4, ATP6V0D1, AURKAIP1, AXIN1, BAD, BANP, BAX, BCL2L12, BCL3, BMP5, BRMS1, C1QBP, CACTIN, CAPN3, CARD10, CBS, CCNB3, CCND3, CD276, CDC14B, CDC25B, CDC37, CDK9, CDKN1C, CDKN2A, CDKN2C, CFH, CIB1, CIRBP, CLN3, CLN6, CLU, CNKSR3, CNOT3, CNOT6, C…
GO:0051248	negative regulation of protein metabolic process	126	22.0665	1.7501860719239458E-7	[A2M, AATF, AGO1, AGO2, AMH, ANAPC11, APC, APOE, APOM, ARRB2, ATP2B4, AXIN1, BANP, BAX, BCL2L12, BCL3, CACTIN, CAPN3, CD276, CDKN1C, CDKN2A, CDKN2C, CIB1, CLN3, CNKSR3, CPEB2, CRTAP, CST3, CTBP1, DAPK3, DEDD, DUSP16, DUSP26, DUSP5, DUSP6, DUSP7, DUSP8, DVL1, EDN1, EIF4EBP1, ENC1, FAM129A, FBXO43, FLNA, FURIN, G6PD, GIPC1, GLG1, GMFB, GPD1L, GPS1, GSTP1, HEXIM1, HMG20B, HSPB1, HYAL2, IGBP1, IGFBP5…
GO:0051252	regulation of RNA metabolic process	505	15.3823	0.0183963	[AATF, ABCA2, ABHD14B, ABLIM1, ABLIM2, ACVR2A, AES, AGO1, AGO2, AGRN, AKAP17A, ALK, AMH, ANP32A, ARHGEF10L, ARID3A, ARID5A, ARMCX3, ARRB2, ASCC2, ASCC3, ASPH, ATF5, ATN1, ATOH8, ATRX, AURKAIP1, AXIN1, BAHD1, BAMBI, BANP, BAZ2B, BCL2L12, BCL3, BCL9L, BEX1, BEX2, BLOC1S2, BMP5, BRF1, BRMS1, BTG1, C14orf169, C1QBP, C6orf1, CACTIN, CAPN15, CAPN3, CARF, CARM1, CASZ1, CBX4, CBX5, CBX6, CCDC106, CDK9, C…
GO:0051258	protein polymerization	37	18.6869	0.0478965	[ADD2, APC, ARF1, ARHGAP6, ARL2, ARPC1B, ARPC5, CAPZA2, CORO1A, CORO1B, FHOD3, JMY, KANK1, LATS1, LRRC16A, MICALL2, MID1IP1, MLST8, MYADM, NCK2, PAK3, PFN1, PICK1, PRKCD, SNCA, SPTBN2, TRIOBP, TUBB3, TUBB4B, TUBB6, TUBD1, TUBE1, TWF2, UBE2C, UBE2S, VASP, WASH6P]
GO:0051260	protein homooligomerization	46	18.1818	0.0457461	[ACTN2, AKR1C1, ALDOA, ALDOC, AMH, AXIN1, BAX, BID, CBR4, CLPP, CLU, COASY, CRTC1, CRYZ, CTH, DCTPP1, EHD1, FASN, GOPC, ITPR3, KCNA3, KCND3, KCNJ10, KCNJ2, KCTD10, KCTD15, KCTD18, KCTD21, KCTD9, LONP1, MGST1, MIF, MUC20, NACC1, PCBD1, PEX14, PPAT, RYR3, SCUBE1, SHARPIN, SRR, TAF10, TNFAIP1, TOR2A, TRAF2, VASP]
GO:0051261	protein depolymerization	17	21.7949	0.0453214	[ADD2, APC, ASPH, CAPZA2, CIB1, F2RL1, GAS2L1, KATNB1, LRRC16A, MICAL1, MID1IP1, PDXP, PLEKHH2, SHROOM2, SPTBN2, TRIOBP, TWF2]
GO:0051270	regulation of cellular component movement	117	19.3069	2.734634374819508E-4	[ABHD6, ACTN1, ACTN4, AMOT, APC, APOE, ARHGAP4, BCAR1, BMP5, C1QBP, CDK6, CIB1, CNN2, COL18A1, CORO1A, CSF1, CTSH, DAPK3, DLC1, EDN1, EGFL7, EPHA2, F2R, F2RL1, FGF12, FLCN, GCNT2, GJA5, GLIPR2, GNA13, GPD1L, GPR56, HAS2, HDAC7, HSPB1, HYAL2, IFITM1, IGBP1, IGFBP5, INSR, IRS1, ITGA5, ITGB3, JUP, KANK1, KCNH2, KCNJ2, KIT, LAMA4, LAMA5, LPAR1, LRRC16A, MAGI2, MAP2K2, MEGF8, MPP1, MYADM, MYO1C, NBL1,…
GO:0051271	negative regulation of cellular component movement	34	20.3593	0.0183799	[ABHD6, ACTN1, ACTN4, APOE, ARHGAP4, BMP5, CNN2, DLC1, EGFL7, FLCN, GPR56, HYAL2, IFITM1, IGFBP5, KANK1, MAGI2, NBL1, NF2, PDGFB, PIN1, PODN, PTEN, PTPRO, RAP2B, RRAS, SEMA3A, SFRP1, SLC9A3R1, SRF, SRGAP3, SULF1, TIMP1, TP53INP1, TPM1]
GO:0051289	protein homotetramerization	17	28.8136	0.00276261	[ACTN2, ALDOA, ALDOC, CBR4, COASY, CRTC1, CRYZ, CTH, DCTPP1, KCNJ10, KCNJ2, PCBD1, PEX14, PPAT, RYR3, SRR, VASP]
GO:0051318	G1 phase	3	60	0.022992	[CDKN1C, MAP3K11, TBRG4]
GO:0051336	regulation of hydrolase activity	169	16.9	0.00803171	[A2M, ACAP3, ACD, ADCY1, ADCY2, ADCY6, ADRBK1, ADRM1, AGAP3, AGRN, AGTR1, AHSA1, AKAP6, AMOT, APAF1, APOC1, ARFGAP1, ARHGAP24, ARHGAP6, ARHGEF1, ARHGEF10L, ARHGEF16, ARHGEF17, ARHGEF18, ARHGEF19, ARL2, ARRB2, ASPH, ATP6V0D1, AURKAIP1, AXIN1, BAD, BAX, BCL2L12, BCL2L13, BID, BOK, BVES, CARD8, CASC5, CDKL5, CDKN2A, CHN1, CHN2, CPEB2, CRADD, CST3, CTSH, CXXC1, DENND3, DENND4A, DENND4B, DENND5B, DLC1…
GO:0051338	regulation of transferase activity	134	17.7955	0.0030134	[ACD, ACSL1, ADCY1, ADCY2, ADCY6, ALK, AMH, APC, APOE, ARFGAP1, ATP6V0D1, AXIN1, BAD, CARD10, CBS, CCNB3, CCND3, CDC25B, CDC37, CDKN1C, CDKN2A, CDKN2C, CIB1, CSF1, CXXC1, DAB1, DUSP16, DUSP26, DUSP5, DUSP6, DUSP7, DUSP8, DVL1, DVL3, EDN1, EIF2S1, F2R, FAM58A, FBXW7, FZD4, GMFB, GNAI2, GPS1, GSTP1, HERC5, HEXIM1, HSPA2, HSPB1, HYAL2, INSR, IRS1, ITGB3, KAT2B, KIT, KITLG, LATS1, LONP1, LPAR1, LRP6,…
GO:0051345	positive regulation of hydrolase activity	94	17.9732	0.00895276	[ACD, ADCY1, ADCY2, ADCY6, ADRBK1, ADRM1, AGRN, AGTR1, AHSA1, AKAP6, APAF1, ARFGAP1, ARHGAP24, ARHGAP6, ARHGEF10L, ARHGEF16, ARHGEF19, ASPH, ATP6V0D1, AXIN1, BAD, BAX, BCL2L13, BID, BOK, CARD8, CDKL5, CDKN2A, CHN2, CRADD, CTSH, CXXC1, DLC1, DNAJB6, EGLN3, EIF2S1, EPHA2, F2R, FASN, GNA13, GNAO1, IFI27, ITPR3, KIT, LLGL1, LPAR1, LRRK2, MAGI2, MEN1, MTCL1, NDEL1, NLRP1, NR1H2, OCRL, PDE1A, PFN1, PGA…
GO:0051348	negative regulation of transferase activity	49	23.445	2.2815606492875652E-4	[APC, APOE, CDKN1C, CDKN2A, CDKN2C, DUSP16, DUSP26, DUSP5, DUSP6, DUSP7, DUSP8, DVL1, GMFB, GPS1, GSTP1, HEXIM1, HSPB1, HYAL2, KAT2B, LATS1, LRP6, MAPK8IP1, MEN1, MLLT1, NF2, NUP62, PAK3, PDCD4, PKIA, PML, PPM1F, PPP2R1A, PRKAG2, PRKAR1A, PRKAR1B, PRKCA, PRKCD, PTEN, RB1, RGS14, SFRP1, SH3BP5, SMPD1, SPRY1, STK38, TNFAIP3, UBASH3B, ZGPAT, ZNF675]
GO:0051403	stress-activated MAPK cascade	43	18.3761	0.0448356	[ANKRD6, AXIN1, CBS, DUSP6, DUSP7, DVL3, EDN1, ELK1, F2RL1, FGF12, FGF14, FZD4, GPS1, GSTP1, IGBP1, KCNH8, MAP2K2, MAP2K7, MAP3K11, MAP3K6, MAP3K9, MAP4K1, MAP4K3, MAPK3, MAPK7, MAPK8IP1, MAPK8IP3, MDFI, MEN1, MYD88, PDCD4, RBM4, RORA, RPS6KA2, SFRP1, SH2D3C, TLR9, TNFRSF19, TPD52L1, TRAF2, WNT5A, ZNF622, ZNF675]
GO:0051488	activation of anaphase-promoting complex activity	4	50	0.0177442	[CDC14B, PTEN, UBE2C, UBE2S]
GO:0051492	regulation of stress fiber assembly	13	24.0741	0.0366147	[AMOT, ARHGAP6, ARHGEF10L, DLC1, FHOD1, LRRC16A, NF2, NOX4, PFN1, PPM1F, SFRP1, SORBS3, TPM1]
GO:0051493	regulation of cytoskeleton organization	61	17.6301	0.0426637	[ADD2, AMOT, APC, ARF1, ARHGAP6, ARHGEF10L, ARHGEF19, ARL2, ARPC1B, ARPC5, BAIAP2L2, CAPZA2, CIB1, CORO1A, CORO1B, DAPK3, DLC1, EDN1, F2RL1, FHOD1, FHOD3, GAS2L1, GPM6B, JMY, KANK1, KATNB1, LATS1, LIMK1, LRRC16A, MAPK3, MID1IP1, MLST8, MYADM, NCK2, NEB, NEXN, NF2, NOX4, NUBP2, PAK3, PDXP, PFN1, PICK1, PKD1, PLEKHH2, PLK2, PPM1F, PRKCD, SFRP1, SHANK3, SHROOM2, SNCA, SORBS3, SPTBN2, STMN3, TPM1, TR…
GO:0051494	negative regulation of cytoskeleton organization	25	25	0.00294796	[ADD2, APC, ARHGAP6, CAPZA2, CIB1, CORO1A, CORO1B, DLC1, FHOD3, GAS2L1, KANK1, KATNB1, LRRC16A, MID1IP1, MYADM, PFN1, PICK1, PLEKHH2, PRKCD, SHANK3, SHROOM2, SNCA, SPTBN2, TRIOBP, TWF2]
GO:0051496	positive regulation of stress fiber assembly	11	29.7297	0.0115207	[AMOT, ARHGEF10L, FHOD1, LRRC16A, NF2, NOX4, PFN1, PPM1F, SFRP1, SORBS3, TPM1]
GO:0051581	negative regulation of neurotransmitter uptake	3	75	0.0102844	[GPM6B, NANOS1, SNCA]
GO:0051589	negative regulation of neurotransmitter transport	4	44.4444	0.0283893	[GPM6B, NANOS1, SLC30A1, SNCA]
GO:0051610	serotonin uptake	3	60	0.022992	[GPM6B, NANOS1, SNCA]
GO:0051611	regulation of serotonin uptake	3	75	0.0102844	[GPM6B, NANOS1, SNCA]
GO:0051612	negative regulation of serotonin uptake	3	75	0.0102844	[GPM6B, NANOS1, SNCA]
GO:0051640	organelle localization	56	20.5128	0.00267342	[AP3D1, ARF1, ARFGAP1, ATCAY, BLOC1S2, CACFD1, CLN3, CLUH, COPE, DAB1, DNM2, EYA1, GRIK5, KATNB1, KIF3A, KIFAP3, LLGL1, LRRK2, MAD1L1, MAP1B, MAP1S, MAP4, MYH10, MYH9, MYO5A, MYO7A, NDEL1, NTN1, NUBP2, PCLO, PIP5K1C, PLXNA2, POLR2M, PTEN, PTGES2, PVRL2, RAB11B, RAB34, RAB3A, RB1, RHOT2, SEPT5, SHROOM2, SLIT1, SLIT3, SNAP23, SNAP25, SNCA, STK11, STK25, STX7, SYP, TMED9, UNC13A, ZDHHC15, ZNF260]
GO:0051646	mitochondrion localization	7	30.4348	0.0359046	[ATCAY, CLUH, LRRK2, MAP1B, MAP1S, PVRL2, RHOT2]
GO:0051648	vesicle localization	31	19.2547	0.0467332	[AP3D1, ARF1, ARFGAP1, BLOC1S2, CACFD1, CLN3, COPE, DNM2, GRIK5, KIF3A, KIFAP3, LLGL1, MYO5A, MYO7A, NDEL1, PCLO, PIP5K1C, PTEN, PTGES2, RAB11B, RAB3A, SEPT5, SHROOM2, SNAP23, SNAP25, SNCA, STX7, SYP, TMED9, UNC13A, ZDHHC15]
GO:0051650	establishment of vesicle localization	30	19.8676	0.0345172	[AP3D1, ARF1, ARFGAP1, BLOC1S2, CACFD1, CLN3, COPE, DNM2, GRIK5, KIF3A, KIFAP3, LLGL1, MYO5A, MYO7A, NDEL1, PCLO, PIP5K1C, PTGES2, RAB11B, RAB3A, SEPT5, SHROOM2, SNAP23, SNAP25, SNCA, STX7, SYP, TMED9, UNC13A, ZDHHC15]
GO:0051651	maintenance of location in cell	29	24.5763	0.00189968	[ANK3, APC, APOE, ARL2, BCL3, CASC5, DBN1, EPB41L3, FLNA, GOPC, GPAA1, GRIK5, JUP, LATS1, MDFI, NFKBIA, NFKBIE, NFKBIL1, PEX14, PIP5K1C, PKD1, PML, POLR2M, RB1, TEX14, TLN1, TONSL, TRIP6, ZNF268]
GO:0051656	establishment of organelle localization	44	20.5607	0.00686079	[AP3D1, ARF1, ARFGAP1, BLOC1S2, CACFD1, CLN3, COPE, DNM2, EYA1, GRIK5, KATNB1, KIF3A, KIFAP3, LLGL1, MAD1L1, MAP1B, MAP1S, MAP4, MYH10, MYH9, MYO5A, MYO7A, NDEL1, NTN1, PCLO, PIP5K1C, PTGES2, PVRL2, RAB11B, RAB3A, RB1, RHOT2, SEPT5, SHROOM2, SLIT1, SLIT3, SNAP23, SNAP25, SNCA, STX7, SYP, TMED9, UNC13A, ZDHHC15]
GO:0051726	regulation of cell cycle	145	18.0348	0.00120822	[AATF, AMH, ANAPC11, ANAPC15, APC, AURKAIP1, BAD, BAX, BEX1, BEX2, BID, BOP1, CAB39L, CABLES2, CCNB3, CCND3, CCNG2, CDC25B, CDC37, CDK6, CDK9, CDKN1C, CDKN2A, CDKN2C, CDT1, CFH, CRADD, CTBP1, DAPK3, DDX39B, DGKZ, DICER1, E2F7, E2F8, E4F1, ECD, EDN1, EIF4EBP1, FAM58A, FBXO43, FBXW7, FLCN, GAS2L1, GIPC1, GPR3, HBP1, HCFC1, HERC5, HEXIM1, HMGA2, HSF1, HSPA2, ID3, IER3, INSR, JMY, JUNB, KANK2, KAT2B,…
GO:0051960	regulation of nervous system development	102	18.1172	0.00527959	[AGRN, APOE, ARHGAP4, ARHGDIA, ARHGEF1, ATF5, BMP5, CDKL5, CHN1, CIB1, CNR1, CXXC1, DAB1, DBN1, DCC, DICER1, DISC1, DVL1, DVL3, EPHB2, EPHB3, EYA1, FAM58A, GLI2, GPR56, HMG20B, HMGA2, ID4, KANK1, KATNB1, KIT, LIMK1, LPAR1, LRP6, LRP8, LRRC4B, LRRC4C, LRRK2, MAGI2, MAN2A1, MAP1B, MAPK8IP3, MEGF8, METRN, MIB1, NBL1, NCS1, NDEL1, NELL1, NLGN3, NOTCH3, NOTCH4, NREP, NSMF, NTN1, NTRK2, NUMBL, OBSL1, P…
GO:0051961	negative regulation of nervous system development	3	50	0.0411606	[SLIT1, SLIT3, WNT5A]
GO:0051964	negative regulation of synapse assembly	3	50	0.0411606	[SLIT1, SLIT3, WNT5A]
GO:0052547	regulation of peptidase activity	57	18.038	0.0332382	[A2M, ADRM1, APAF1, ASPH, BAD, BAX, BCL2L12, BCL2L13, BID, BOK, CARD8, CDKN2A, CRADD, CST3, CTSH, DLC1, DNAJB6, EGLN3, EPHA7, F2R, FASN, FURIN, GPI, GPX1, IFI27, IGBP1, INTS1, ITIH4, MDM2, MEN1, MICAL1, MKL1, NLRP1, NR4A1, PIDD, PML, PPM1F, PRELID1, PROS1, PSMF1, RAG1, RECK, RPS27L, SENP1, SERPINB9, SERPING1, SERPINH1, SNCA, SOX2, SPOCK1, TIMP1, TIMP3, TIMP4, TPD52L1, TRAF2, UACA, WNT9A]
GO:0052548	regulation of endopeptidase activity	56	18.123	0.031899	[A2M, ADRM1, APAF1, ASPH, BAD, BAX, BCL2L12, BCL2L13, BID, BOK, CARD8, CDKN2A, CRADD, CST3, DLC1, DNAJB6, EGLN3, EPHA7, F2R, FASN, FURIN, GPI, GPX1, IFI27, IGBP1, INTS1, ITIH4, MDM2, MEN1, MICAL1, MKL1, NLRP1, NR4A1, PIDD, PML, PPM1F, PRELID1, PROS1, PSMF1, RAG1, RECK, RPS27L, SENP1, SERPINB9, SERPING1, SERPINH1, SNCA, SOX2, SPOCK1, TIMP1, TIMP3, TIMP4, TPD52L1, TRAF2, UACA, WNT9A]
GO:0055086	nucleobase-containing small molecule metabolic process	204	16.6803	0.00673283	[ABCA1, ABCA2, ACAP3, ACOT7, ADCY1, ADCY2, ADCY6, ADK, ADM, AGAP3, AGRN, AHSA1, AK4, AK5, AKAP12, AKAP5, AKAP6, ALDOA, AMOT, APOE, APRT, ARF1, ARFGAP1, ARHGAP24, ARHGAP6, ARHGEF1, ARHGEF10L, ARHGEF16, ARHGEF17, ARHGEF18, ARHGEF19, ARL2, ARL8A, ARRB2, ATIC, ATP2B4, ATP5D, ATP6V1A, AXIN1, BAD, BVES, CACNB4, CBS, CDKL5, CHD8, CHN1, CHN2, COASY, CPEB2, CSGALNACT1, DCAKD, DCTPP1, DDX17, DDX39B, DDX54,…
GO:0055129	L-proline biosynthetic process	3	60	0.022992	[PYCR1, PYCR2, PYCRL]
GO:0060024	rhythmic synaptic transmission	4	57.1429	0.00998895	[EDN1, NLGN3, PTEN, SH2D3C]
GO:0060055	angiogenesis involved in wound healing	5	35.7143	0.03818	[GPX1, ITGB3, SRF, TNFAIP3, VEGFB]
GO:0060071	Wnt signaling pathway, planar cell polarity pathway	10	30.303	0.0136489	[ANKRD6, DVL1, DVL3, LRP6, MAGI2, MLLT3, RORA, SFRP1, WNT5A, ZNRF3]
GO:0060174	limb bud formation	5	50	0.0078419	[PLXNA2, SEMA3C, SOX11, SOX9, WNT3]
GO:0060255	regulation of macromolecule metabolic process	723	15.2693	0.00775269	[A2M, AATF, ABCA2, ABHD14B, ABLIM1, ABLIM2, ACD, ACSL1, ACVR2A, ADCY1, ADCY2, ADCY6, ADK, AES, AGO1, AGO2, AGRN, AGTR1, AIMP2, AKAP17A, AKR1C1, ALK, AMH, ANAPC11, ANK3, ANP32A, AP2A1, APBA2, APBA3, APC, APOE, APOM, ARF1, ARFGAP1, ARHGEF10L, ARID3A, ARID5A, ARMCX3, ARRB2, ASCC2, ASCC3, ASPH, ATF5, ATN1, ATOH8, ATP2B4, ATP6V0D1, ATP7A, ATRX, AURKAIP1, AXIN1, BAD, BAG3, BAHD1, BAMBI, BANP, BAX, BAZ2…
GO:0060284	regulation of cell development	119	18.7402	7.971983899178543E-4	[AKAP6, APOE, ARHGAP4, ARHGDIA, ARHGEF1, ATF5, BAD, BAMBI, BAX, BCL9L, BMP5, BTG1, C1QBP, CAPN3, CDKL5, CHN1, CIB1, CNOT3, CNR1, CXXC1, DAB1, DBN1, DCC, DICER1, DISC1, DVL1, EDN1, EPHB2, EPHB3, EYA1, FAM58A, GCNT2, GLI2, GLIPR2, GPR56, HIF1AN, HMG20B, HMGA2, ID4, KANK1, KATNB1, KIT, LIMK1, LPAR1, LRP6, LRP8, LRRC16A, LRRC4C, LRRK2, MAGI2, MAN2A1, MAP1B, MAPK8IP3, MEGF8, METRN, MIB1, MYADM, NBL1, …
GO:0060291	long-term synaptic potentiation	9	31.0345	0.0161104	[GNAI2, ITPR3, NLGN3, NTRK2, PLK2, PTEN, RGS14, SHANK3, SNCA]
GO:0060292	long term synaptic depression	7	41.1765	0.00614278	[ABHD6, ARF1, PICK1, PLK2, PTEN, SHANK3, SRF]
GO:0060322	head development	13	24.0741	0.0366147	[ASPH, CSRNP1, FLVCR1, GLI2, LDB2, LRP6, MYH3, OSR2, PGAP1, RAB3GAP1, STRA6, WNT3, WNT5A]
GO:0060351	cartilage development involved in endochondral bone morphogenesis	7	29.1667	0.0446612	[CARM1, CBS, COL9A1, HSPG2, RARB, RARG, SOX9]
GO:0060373	regulation of ventricular cardiac muscle cell membrane depolarization	3	50	0.0411606	[GJA5, GPD1L, SCN3B]
GO:0060416	response to growth hormone	11	26.1905	0.029572	[BDH1, CACYBP, CISH, CPS1, FAM58A, IRS1, JAK3, MAPK3, PTPN1, PXDN, STAT5A]
GO:0060560	developmental growth involved in morphogenesis	38	24.0506	6.529785467351024E-4	[APOE, ARHGAP4, BIN3, CARM1, CDKL5, COL9A1, CSF1, CXXC1, DCC, DVL1, LIMK1, LMNB2, LRP6, MAGI2, MAP1B, MEGF8, NDEL1, NELL1, NELL2, NLGN3, NTN1, RARB, RARG, RYK, SALL1, SEMA3A, SEMA3F, SEMA7A, SFRP1, SLIT1, SLIT3, SMOX, SOX9, TNFRSF12A, TWF2, ULK1, WNT3, WNT5A]
GO:0060600	dichotomous subdivision of an epithelial terminal unit	5	45.4545	0.0127092	[CTSH, NELL1, PLXNA1, SEMA3A, SEMA3C]
GO:0060606	tube closure	19	21.8391	0.0351334	[ADM, APAF1, DEAF1, DLC1, DVL1, DVL3, FUZ, FZD3, FZD9, GATAD2A, LRP6, PFN1, SALL1, SFRP1, TWIST1, VASP, WNT5A, ZIC2, ZIC5]
GO:0060666	dichotomous subdivision of terminal units involved in salivary gland branching	4	66.6667	0.00482332	[NELL1, PLXNA1, SEMA3A, SEMA3C]
GO:0060696	regulation of phospholipid catabolic process	3	60	0.022992	[APOC1, PRKCD, SCARB1]
GO:0060717	chorion development	3	50	0.0411606	[DNAJB6, E2F7, E2F8]
GO:0060761	negative regulation of response to cytokine stimulus	10	28.5714	0.0207599	[AES, CACTIN, F2RL1, GSTP1, MAPK7, NR1H2, PXDN, SLIT1, SLIT3, ZNF675]
GO:0060996	dendritic spine development	12	30	0.00785694	[ACSL4, EPHB2, EPHB3, LLGL1, LPAR1, LRP8, LRRK2, NLGN3, PAK3, PTEN, SHANK3, SRGAP3]
GO:0060997	dendritic spine morphogenesis	9	32.1429	0.0126743	[EPHB2, EPHB3, LLGL1, LRP8, LRRK2, NLGN3, PAK3, PTEN, SHANK3]
GO:0061029	eyelid development in camera-type eye	5	45.4545	0.0127092	[OSR2, SOX11, SRF, STRA6, TWIST1]
GO:0061035	regulation of cartilage development	15	25.8621	0.013761	[ADAMTS7, CARM1, GLG1, GLI2, LOXL2, LTBP3, NKX3-2, PKDCC, RARB, RARG, RELA, SOX6, SOX9, WNT5A, WNT9A]
GO:0061136	regulation of proteasomal protein catabolic process	18	21.6867	0.0420638	[AXIN1, CLU, DVL1, GIPC1, GPX1, HSPBP1, LRRK2, MDM2, NELL1, PKD1, PLK2, PRKCA, PSMF1, PTEN, RAD23A, RHBDF1, SENP1, STUB1]
GO:0061387	regulation of extent of cell growth	22	34.375	4.063705685615073E-5	[APOE, ARHGAP4, CDKL5, CXXC1, DCC, LIMK1, MAP1B, MEGF8, NDEL1, NELL1, NTN1, RYK, SEMA3A, SEMA3F, SEMA7A, SLIT1, SLIT3, TNFRSF12A, TWF2, ULK1, WNT3, WNT5A]
GO:0061548	ganglion development	4	44.4444	0.0283893	[NELL1, NELL2, SEMA3A, SEMA3F]
GO:0061549	sympathetic ganglion development	4	44.4444	0.0283893	[NELL1, NELL2, SEMA3A, SEMA3F]
GO:0061564	axon development	118	19.7655	9.560198167117293E-5	[ABLIM1, ABLIM2, ACTB, ACTG1, ADCY1, AGRN, ANK3, AP2A1, AP2S1, APC, APOE, ARHGAP39, ARHGAP4, ARHGDIA, ARHGEF1, ARX, BAI1, BRSK1, CACNB2, CACNB4, CDKL5, CHN1, CLTA, COL5A1, COL9A1, CXXC1, DAB1, DCC, DPYSL5, DVL1, EFNA2, EPHA7, EPHB2, EPHB3, ETV1, FLOT1, FOXB1, FZD3, FZD9, GLI2, ITGA5, ITGB3, KIAA1598, LIMK1, LLGL1, LMNB2, LRRC4C, MAP1B, MAP2K2, MAPK3, MAPK8IP3, MEGF8, METRN, MYH10, MYH9, MYL9, NCA…
GO:0061572	actin filament bundle organization	24	24.2424	0.00536982	[ACTN1, ACTN4, ADD2, AMOT, ARHGAP6, ARHGEF10L, CORO1B, DLC1, FHOD1, FSCN1, LIMK1, LRRC16A, MYO1B, NF2, NOX4, PFN1, PPM1F, SFRP1, SHANK3, SHROOM2, SORBS3, SRF, TNFAIP1, TPM1]
GO:0070129	regulation of mitochondrial translation	3	50	0.0411606	[C1QBP, MALSU1, MTG1]
GO:0070371	ERK1 and ERK2 cascade	36	21.9512	0.00470675	[ACKR3, AMH, ARRB2, CIB1, CNKSR3, CTSH, DCC, DUSP26, DUSP6, EPHA2, EPHA7, F2R, F2RL1, FBXW7, FGFR4, FLCN, GCNT2, GLIPR2, GSTP1, MAP2K2, MAPK3, MIF, NOX4, PDGFB, PIN1, PRKCA, RAPGEF2, RGS14, RPS6KA6, SEMA7A, SLC9A3R1, SOX9, SPRY1, ST5, TNIP1, VEGFB]
GO:0070372	regulation of ERK1 and ERK2 cascade	33	22.449	0.00462082	[ACKR3, AMH, ARRB2, CIB1, CNKSR3, DCC, DUSP26, DUSP6, EPHA2, EPHA7, F2R, F2RL1, FBXW7, FGFR4, FLCN, GCNT2, GLIPR2, GSTP1, MAPK3, MIF, NOX4, PDGFB, PIN1, PRKCA, RAPGEF2, RGS14, RPS6KA6, SEMA7A, SLC9A3R1, SPRY1, ST5, TNIP1, VEGFB]
GO:0070373	negative regulation of ERK1 and ERK2 cascade	11	34.375	0.00341191	[CNKSR3, DUSP26, DUSP6, FLCN, GSTP1, PIN1, RGS14, RPS6KA6, SLC9A3R1, SPRY1, TNIP1]
GO:0070544	histone H3-K36 demethylation	3	50	0.0411606	[C14orf169, KDM4A, KDM7A]
GO:0070555	response to interleukin-1	21	27.2727	0.00199942	[ADAMTS7, AES, APOE, CACTIN, CYBA, EDN1, HAS2, HYAL2, IGBP1, MAPK3, MYD88, NFKB1, PRKCA, RELA, RPS6KA4, SFRP1, SNCA, SOX9, TIMP1, TNIP2, ZNF675]
GO:0070613	regulation of protein processing	49	20	0.00779426	[A2M, AKR1C1, APOE, ASPH, AURKAIP1, AXIN1, BAD, BCL2L12, C1QBP, CAPN3, CFH, CLN3, CLN6, CLU, DISC1, DVL1, FBXW7, FGFR4, FURIN, GIPC1, GLG1, GPX1, HSPBP1, LDLRAD3, LRRK2, LTBP4, MASP1, MDM2, NELL1, NR1H2, OGT, PKD1, PLK2, PML, PRKCA, PROS1, PSMF1, PTEN, RAD23A, RHBDF1, RPS6KA2, SENP1, SERPINB9, SERPING1, SERPINH1, STUB1, TIMP1, TIMP3, WFS1]
GO:0070662	mast cell proliferation	3	75	0.0102844	[KIT, KITLG, STAT5A]
GO:0070727	cellular macromolecule localization	192	16.4807	0.0135491	[ACD, ACTN2, AGAP3, AGRN, AKAP12, AKAP5, AKAP6, AMOT, ANK3, AP1B1, AP1G1, AP2A1, AP2S1, AP3D1, APC, ARHGEF16, ARL2, ARMCX3, ASPH, ASPSCR1, ASTN2, AURKAIP1, AXIN1, BAD, BAMBI, BANP, BAX, BCL3, BID, BSG, C1QTNF3, CAPN3, CASC5, CDC37, CDKN2A, CHERP, CIB1, CLTA, CLTB, CNTNAP2, DBN1, DNAJB6, DUSP16, DVL1, EHD1, EHD2, EIF2D, EMD, EPB41L3, EPHA2, EYA1, F2R, FERMT2, FLCN, FLNA, FLOT1, GDAP1, GET4, GFER, …
GO:0070813	hydrogen sulfide metabolic process	3	60	0.022992	[CBS, CTH, MPST]
GO:0070814	hydrogen sulfide biosynthetic process	3	75	0.0102844	[CBS, CTH, MPST]
GO:0070828	heterochromatin organization	4	44.4444	0.0283893	[BAHD1, CDKN2A, HMGA1, HMGA2]
GO:0070830	tight junction assembly	13	25.4902	0.0235717	[ACTN4, APC, ARL2, F11R, FRMPD2, MICALL2, MPP5, MPP7, MYO1C, NEDD4L, PARD6A, PRKCA, SRF]
GO:0070848	response to growth factor	145	20.8633	7.202598121084918E-7	[AATF, ADAMTS7, ADCY1, ADCY2, ADCY6, ADRBK1, AGO1, AGO2, AP2A1, AP2S1, APOE, ARHGAP4, ARHGDIA, ARHGEF1, ARHGEF16, ARHGEF17, ARHGEF18, ARRB2, AXIN1, BAD, BAMBI, BCAR1, BCL9L, CD109, CDK9, CDKN1C, CGN, CIB1, CLTA, CPS1, DNAL4, DUSP6, DUSP7, E2F4, EHD1, ELK1, EMD, EPHA2, F11R, FAM58A, FBN1, FBN2, FERMT2, FGD3, FGF12, FGF14, FGFR4, FIBP, FLCN, FRS3, FURIN, FZD4, GCNT2, GDF15, GIPC1, GLG1, GPI, HAS2, …
GO:0070887	cellular response to chemical stimulus	371	16.8483	1.0953562000886902E-4	[AATF, ABCA1, ACD, ACKR3, ACSL1, ACSS1, ADAMTS7, ADCY1, ADCY2, ADCY6, ADRBK1, AGAP3, AGO1, AGO2, AGPAT2, AGTR1, AKAP6, AKR1C1, AMH, AP2A1, AP2S1, APOE, APRT, ARFGAP1, ARHGAP4, ARHGDIA, ARHGEF1, ARHGEF16, ARHGEF17, ARHGEF18, ARRB2, ASPH, ATP6V0C, ATP6V0D1, ATP6V0E2, ATP6V1A, ATP7A, AURKAIP1, AXIN1, BAD, BAMBI, BAX, BCAR1, BCL9L, C1QBP, CAB39L, CACTIN, CACYBP, CAPN10, CAPN3, CARF, CBS, CD109, CDC37…
GO:0071157	negative regulation of cell cycle arrest	6	33.3333	0.0332155	[AMH, CDK9, MDM2, MDM4, MIF, ZNF268]
GO:0071310	cellular response to organic substance	298	16.9511	3.8124014137122373E-4	[AATF, ABCA1, ACD, ACKR3, ACSL1, ADAMTS7, ADCY1, ADCY2, ADCY6, ADRBK1, AGO1, AGO2, AGPAT2, AKAP6, AKR1C1, AMH, AP2A1, AP2S1, APOE, APRT, ARFGAP1, ARHGAP4, ARHGDIA, ARHGEF1, ARHGEF16, ARHGEF17, ARHGEF18, ARRB2, ATP6V0C, ATP6V0D1, ATP6V0E2, ATP6V1A, AXIN1, BAD, BAMBI, BAX, BCAR1, BCL9L, CAB39L, CACTIN, CAPN10, CD109, CDC37, CDK9, CDKN1C, CGN, CIB1, CISH, CLTA, CNOT6, CNTFR, COASY, CORO1A, CPEB2, CP…
GO:0071347	cellular response to interleukin-1	14	28	0.00829484	[ADAMTS7, APOE, CACTIN, EDN1, HAS2, HYAL2, MAPK3, NFKB1, RELA, RPS6KA4, SFRP1, SOX9, TNIP2, ZNF675]
GO:0071363	cellular response to growth factor stimulus	143	21.1226	4.0923923097086164E-7	[AATF, ADAMTS7, ADCY1, ADCY2, ADCY6, ADRBK1, AGO1, AGO2, AP2A1, AP2S1, APOE, ARHGAP4, ARHGDIA, ARHGEF1, ARHGEF16, ARHGEF17, ARHGEF18, ARRB2, AXIN1, BAD, BAMBI, BCAR1, BCL9L, CD109, CDK9, CDKN1C, CGN, CIB1, CLTA, CPS1, DNAL4, DUSP6, DUSP7, E2F4, EHD1, ELK1, EMD, F11R, FAM58A, FBN1, FBN2, FERMT2, FGD3, FGF12, FGF14, FGFR4, FIBP, FLCN, FRS3, FURIN, FZD4, GCNT2, GDF15, GIPC1, GLG1, GPI, HAS2, HSPB1, …
GO:0071375	cellular response to peptide hormone stimulus	55	17.7419	0.0470414	[ADCY1, ADCY2, ADCY6, APRT, ATP6V0C, ATP6V0D1, ATP6V0E2, ATP6V1A, BCAR1, CAB39L, CAPN10, CISH, COASY, CPEB2, CPS1, DOK1, EIF4EBP1, FAM58A, FGFR4, GNG11, GNG2, GNG5, GNG7, INSR, IRS1, JAK3, KANK1, KAT2B, MAP2K2, MAPK3, MDM2, MLST8, MTUS1, MYO5A, OGT, PIK3R2, PIK3R3, PPAT, PRKAG2, PRKAR1A, PRKAR1B, PRKCA, PRKCD, PTPN1, PXDN, RELA, REPIN1, RPTOR, SHC3, SLC2A8, SREBF1, STAT5A, STK11, THEM4, TLR9]
GO:0071377	cellular response to glucagon stimulus	11	28.2051	0.0172748	[ADCY1, ADCY2, ADCY6, CPS1, GNG11, GNG2, GNG5, GNG7, PRKAR1A, PRKAR1B, PRKCA]
GO:0071397	cellular response to cholesterol	6	42.8571	0.00887983	[ABCA1, APOE, LRP6, LRP8, MLC1, SMOX]
GO:0071495	cellular response to endogenous stimulus	160	17.4863	0.00262283	[ACSL1, ADAMTS7, ADCY1, ADCY2, ADCY6, ADRBK1, AGO1, AGO2, AKAP6, AKR1C1, APAF1, APRT, ARHGEF18, ARRB2, ATP6V0C, ATP6V0D1, ATP6V0E2, ATP6V1A, AXIN1, BAD, BAMBI, BCAR1, BCL9L, CAB39L, CAPN10, CD109, CDK9, CDKN1C, CGN, CIB1, CISH, COASY, CPEB2, CPS1, CTSH, CTSL, CYBA, DHX34, DOK1, DUSP6, E2F4, EHD1, EIF4EBP1, F11R, FAM58A, FBN1, FBN2, FECH, FERMT2, FGF12, FGF14, FGFR4, FIBP, FLCN, FOSL2, FRS3, FURIN…
GO:0071501	cellular response to sterol depletion	4	40	0.0420875	[ARHGEF10L, EIF2S1, FBXW7, INSIG2]
GO:0071559	response to transforming growth factor beta	49	21.875	0.00119887	[ARHGEF18, ARRB2, AXIN1, BAMBI, BCL9L, CD109, CDK9, CDKN1C, CGN, E2F4, F11R, FAM58A, FBN1, FBN2, FERMT2, FLCN, FURIN, GCNT2, GDF15, GIPC1, GLG1, GPI, HYAL2, JUNB, LTBP3, LTBP4, MAPK7, MEN1, NCOR2, NEDD4L, NOX4, NREP, PARD6A, PDE3A, PDGFB, PIN1, PML, PPP1CA, SFRP1, SMAD5, SOX11, SOX6, SOX9, STK11, STUB1, TFDP2, TGFB1I1, USP9Y, WNT5A]
GO:0071560	cellular response to transforming growth factor beta stimulus	49	21.9731	0.00108305	[ARHGEF18, ARRB2, AXIN1, BAMBI, BCL9L, CD109, CDK9, CDKN1C, CGN, E2F4, F11R, FAM58A, FBN1, FBN2, FERMT2, FLCN, FURIN, GCNT2, GDF15, GIPC1, GLG1, GPI, HYAL2, JUNB, LTBP3, LTBP4, MAPK7, MEN1, NCOR2, NEDD4L, NOX4, NREP, PARD6A, PDE3A, PDGFB, PIN1, PML, PPP1CA, SFRP1, SMAD5, SOX11, SOX6, SOX9, STK11, STUB1, TFDP2, TGFB1I1, USP9Y, WNT5A]
GO:0071605	monocyte chemotactic protein-1 production	3	50	0.0411606	[C1QTNF3, GSTP1, TWIST1]
GO:0071625	vocalization behavior	6	42.8571	0.00887983	[CNTNAP2, LLGL1, NLGN3, NLGN4Y, NRXN2, SHANK3]
GO:0071637	regulation of monocyte chemotactic protein-1 production	3	50	0.0411606	[C1QTNF3, GSTP1, TWIST1]
GO:0071679	commissural neuron axon guidance	5	55.5556	0.00443791	[EPHB2, FZD3, FZD9, NELL1, RYK]
GO:0071692	protein localization to extracellular region	3	60	0.022992	[FBN1, FBN2, NBL1]
GO:0071694	maintenance of protein location in extracellular region	3	60	0.022992	[FBN1, FBN2, NBL1]
GO:0071702	organic substance transport	346	15.4602	0.0394337	[ABCA1, ABCA2, ABCA5, ABCC5, ACD, ACSL1, ACSL4, ACTN4, ADRBK1, AGAP3, AKAP12, AKAP5, AKAP6, AKR1C1, AMH, ANK3, AP1B1, AP1G1, AP2A1, AP2S1, AP3D1, AP5Z1, APBA2, APBA3, APLN, APOC1, APOE, APOM, ARF1, ARFGAP1, ARHGAP33, ARRB2, ASPH, ASPSCR1, ATG4D, ATP10D, ATP11B, ATP6V0C, ATP6V0D1, ATP6V0E2, ATP6V1A, ATP9A, AURKAIP1, AXIN1, BAD, BAMBI, BCL3, BID, BSG, BTN3A1, C1QTNF3, C5orf30, CA14, CACNB4, CAPN10,…
GO:0071774	response to fibroblast growth factor	43	19.457	0.0190046	[ADCY1, ADCY2, ADCY6, ADRBK1, AGO1, AGO2, BAD, CPS1, DUSP6, FAM58A, FGF12, FGF14, FGFR4, FIBP, FRS3, HYAL2, IRS1, ITPR3, KIT, KITLG, MAP2K2, MAPK3, MDM2, MLST8, NR4A1, PAK3, PDE1A, PDGFB, PIK3R2, PPP2R1A, PRKAR1A, PRKAR1B, PRKCA, PRKCD, PTEN, RAB14, SFRP1, SNCA, SPRY1, SULF1, THEM4, TNRC6B, WNT5A]
GO:0071825	protein-lipid complex subunit organization	10	27.7778	0.0251829	[ABCA1, ABCA5, AGTR1, APOC1, APOE, APOM, FECH, LPL, NR1H2, SCARB1]
GO:0071827	plasma lipoprotein particle organization	10	29.4118	0.0169305	[ABCA1, ABCA5, AGTR1, APOC1, APOE, APOM, FECH, LPL, NR1H2, SCARB1]
GO:0071887	leukocyte apoptotic process	20	20.8333	0.0486954	[AMH, BAX, CDKN2A, CTSL, FASN, IRF7, JAK3, KITLG, MIF, NOC2L, PRELID1, PTEN, RAG1, RAPGEF2, SIVA1, STAT5A, TNFRSF21, TRAF3IP2, TSC22D3, WNT5A]
GO:0071900	regulation of protein serine/threonine kinase activity	88	20.8038	1.2103096481061364E-4	[ACSL1, ALK, AMH, APC, APOE, AXIN1, CARD10, CBS, CCNB3, CCND3, CDC37, CDKN1C, CDKN2A, CDKN2C, CIB1, DUSP16, DUSP5, DUSP6, DUSP7, DUSP8, DVL3, EDN1, FAM58A, FZD4, GPS1, GSTP1, HERC5, HEXIM1, HSPA2, HSPB1, HYAL2, INSR, KAT2B, KIT, KITLG, LATS1, LONP1, LPAR1, LRP6, LRRK2, MALT1, MAP2K2, MAP2K7, MAP3K11, MAP3K6, MAP3K9, MAP4K1, MAP4K3, MAPK3, MAPK8IP1, MAPK8IP3, MAPRE3, MDFI, MEN1, MIF, MNAT1, MUC20,…
GO:0071901	negative regulation of protein serine/threonine kinase activity	38	33.3333	1.9000699259266867E-7	[APC, APOE, CDKN1C, CDKN2A, CDKN2C, DUSP16, DUSP5, DUSP6, DUSP7, DUSP8, GPS1, GSTP1, HEXIM1, HSPB1, HYAL2, KAT2B, LATS1, LRP6, MAPK8IP1, MEN1, NUP62, PAK3, PDCD4, PKIA, PPP2R1A, PRKAG2, PRKAR1A, PRKAR1B, PRKCA, PRKCD, PTEN, RGS14, SFRP1, SMPD1, SPRY1, STK38, TNFAIP3, ZNF675]
GO:0072358	cardiovascular system development	153	17.3273	0.00458645	[ACKR3, ADAM19, ADM, ADRBK1, AKAP6, AMOT, APOE, ARHGAP24, ATP7A, BAI1, BAX, BTG1, CACYBP, CIB1, COL11A1, COL18A1, COL5A1, CTSH, DDX17, DHCR7, DICER1, DLC1, DUSP6, DVL1, DVL3, E2F7, E2F8, ECE1, EDN1, EGFL7, EPHA2, EPHB2, EPHB3, EYA1, FBN1, FBXW7, FGF12, FLVCR1, FOXP4, FZD3, FZD4, FZD9, GATAD2A, GJA5, GLI2, GNA11, GNA13, GPI, GPR56, GPX1, HAS2, HDAC7, HEXIM1, HIF1AN, HSPB1, HSPG2, ID3, INSR, ITGA5,…
GO:0072359	circulatory system development	153	17.3273	0.00458645	[ACKR3, ADAM19, ADM, ADRBK1, AKAP6, AMOT, APOE, ARHGAP24, ATP7A, BAI1, BAX, BTG1, CACYBP, CIB1, COL11A1, COL18A1, COL5A1, CTSH, DDX17, DHCR7, DICER1, DLC1, DUSP6, DVL1, DVL3, E2F7, E2F8, ECE1, EDN1, EGFL7, EPHA2, EPHB2, EPHB3, EYA1, FBN1, FBXW7, FGF12, FLVCR1, FOXP4, FZD3, FZD4, FZD9, GATAD2A, GJA5, GLI2, GNA11, GNA13, GPI, GPR56, GPX1, HAS2, HDAC7, HEXIM1, HIF1AN, HSPB1, HSPG2, ID3, INSR, ITGA5,…
GO:0072497	mesenchymal stem cell differentiation	4	44.4444	0.0283893	[LTBP3, SOX6, SOX9, WNT3]
GO:0072521	purine-containing compound metabolic process	175	16.8431	0.00804866	[ABCA1, ABCA2, ACAP3, ACOT7, ADCY2, ADCY6, ADK, ADM, AGAP3, AGRN, AHSA1, AK4, AK5, AKAP12, AKAP5, AKAP6, ALDOA, AMOT, APOE, APRT, ARF1, ARFGAP1, ARHGAP24, ARHGAP6, ARHGEF1, ARHGEF10L, ARHGEF16, ARHGEF17, ARHGEF18, ARHGEF19, ARL2, ARL8A, ARRB2, ATIC, ATP2B4, ATP5D, ATP6V1A, AXIN1, BAD, BVES, CACNB4, CBS, CDKL5, CHD8, CHN1, CHN2, COASY, CPEB2, DCAKD, DDX17, DDX39B, DDX54, DENND3, DENND4A, DENND4B, …
GO:0072523	purine-containing compound catabolic process	130	17.5913	0.00516351	[ABCA2, ACAP3, AGAP3, AGRN, AHSA1, AMOT, ARF1, ARFGAP1, ARHGAP24, ARHGAP6, ARHGEF1, ARHGEF10L, ARHGEF16, ARHGEF17, ARHGEF18, ARHGEF19, ARL2, ARL8A, ARRB2, ATP5D, AXIN1, BVES, CDKL5, CHD8, CHN1, CHN2, CPEB2, DDX17, DDX39B, DDX54, DENND3, DENND4A, DENND4B, DENND5B, DLC1, DNAJB6, DNM2, DNM3, ENPP4, EPHA2, EPHB3, FGD3, GIT1, GNAO1, GNG11, GNG5, GNL3, GPX1, ITPA, KALRN, KATNB1, LLGL1, LRRK2, MAPK7, ML…
GO:0072604	interleukin-6 secretion	5	55.5556	0.00443791	[C1QTNF3, F2R, F2RL1, HYAL2, TWIST1]
GO:0072606	interleukin-8 secretion	5	41.6667	0.0192712	[F2R, F2RL1, HYAL2, SSC5D, WNT5A]
GO:0080090	regulation of primary metabolic process	766	15.3723	0.0028575	[A2M, AATF, ABCA1, ABCA2, ABHD14B, ABLIM1, ABLIM2, ACAP3, ACD, ACSL1, ACVR2A, ADCY1, ADCY2, ADCY6, ADM, AES, AGAP3, AGO1, AGO2, AGRN, AGTR1, AHSA1, AIMP2, AKAP12, AKAP17A, AKAP5, AKAP6, AKR1C1, ALK, AMH, AMOT, ANAPC11, ANP32A, AP2A1, APC, APOC1, APOE, APOM, ARFGAP1, ARHGAP24, ARHGAP6, ARHGEF1, ARHGEF10L, ARHGEF16, ARHGEF17, ARHGEF18, ARHGEF19, ARID3A, ARID5A, ARL2, ARMCX3, ARRB2, ASCC2, ASCC3, AS…
GO:0080134	regulation of response to stress	167	17.6346	0.00147809	[A2M, ACKR3, AGTR1, AKR1C1, AMH, ANKRD6, AP1B1, AP1G1, AP2A1, AP2S1, APOE, ARF1, ARRB2, AXIN1, BAX, C1QBP, C1QTNF3, CACTIN, CAPN3, CBS, CD109, CD276, CDC37, CDK6, CDK9, CDKN2A, CFH, CLN3, CLU, CNPY3, CNR1, CTSL, CXXC1, DAK, DDX39B, DDX5, DDX60, DEAF1, DLC1, DUSP6, DUSP7, DVL3, EDN1, ELK1, ENPP4, EYA1, F2R, F2RL1, FBXW7, FECH, FZD4, GPX1, GPX4, GSTP1, H2AFX, HERC5, HIC1, HLA-A, HMGA1, HMGA2, HSPB1…
GO:0080135	regulation of cellular response to stress	79	20.8995	2.2630828702007298E-4	[ACKR3, AMH, ANKRD6, AXIN1, BAX, CBS, CDK6, CDK9, CDKN2A, CLN3, CLU, CXXC1, DDX39B, DDX5, DLC1, DVL3, EDN1, EYA1, F2RL1, FBXW7, FECH, FZD4, GPX1, GSTP1, H2AFX, HIC1, HMGA1, HMGA2, HSPB1, IER3, IGBP1, KIAA1324, MAP2K2, MAP2K7, MAP3K11, MAP3K6, MAP3K9, MAP4K1, MAPK3, MAPK7, MAPK8IP1, MAPK8IP3, MCL1, MDFI, MDM2, MEN1, MIF, MMAB, MYD88, NDEL1, NME5, NUDT16, P4HB, PDCD4, PIAS4, PLA2R1, PML, PPP4C, PRK…
GO:0086009	membrane repolarization	7	31.8182	0.0283607	[AKAP6, GJA5, KCND3, KCNH2, KCNIP2, KCNJ2, NEDD4L]
GO:0086010	membrane depolarization during action potential	5	35.7143	0.03818	[ANK3, GJA5, KCNH2, KCNJ2, SCN3B]
GO:0090036	regulation of protein kinase C signaling	6	37.5	0.0184017	[AKAP12, GPD1L, MYADM, PLA2G6, SEZ6L2, WNT5A]
GO:0090066	regulation of anatomical structure size	77	20.4244	5.569545990418263E-4	[ADD2, ADM, AGTR1, AMOT, APLN, APOE, ARF1, ARHGAP4, ARPC1B, ARPC5, ATP2B4, CAPZA2, CBS, CDKL5, CORO1A, CORO1B, CPS1, CXXC1, DCC, DHX34, E2F4, ECE1, EDN1, F2R, F2RL1, FHOD3, GJA5, GPX1, INF2, JMY, KANK1, LATS1, LIMK1, LRRC16A, LRRK2, MANF, MAP1B, MEGF8, MLST8, MYADM, NANOS1, NCK2, NDEL1, NEB, NELL1, NOS3, NPR1, NTN1, PAK3, PDXP, PEX11A, PFN1, PICK1, PLA2G6, PLEKHH2, PLOD3, PRKCD, PTEN, RARG, RPTOR…
GO:0090103	cochlea morphogenesis	7	29.1667	0.0446612	[DVL1, DVL3, EYA1, GLI2, POU3F4, SOX9, WNT5A]
GO:0090130	tissue migration	39	20.9677	0.00753937	[AMOT, APOE, BCAR1, CIB1, CORO1B, CTSH, EDN1, EPHA2, GIPC1, GLIPR2, GPX1, HDAC7, HSPB1, ITGB3, KIT, LOXL2, MEN1, MYH9, NANOS1, NELL1, NELL2, NOS3, NR4A1, PDGFB, PFN1, PKN3, PPAP2B, PPM1F, PRKCA, PRKX, PTEN, SCARB1, SEMA3A, SOX9, SRF, TNFSF12, VEGFC, WNT5A, ZNF580]
GO:0090132	epithelium migration	39	21.547	0.00470094	[AMOT, APOE, BCAR1, CIB1, CORO1B, CTSH, EDN1, EPHA2, GIPC1, GLIPR2, GPX1, HDAC7, HSPB1, ITGB3, KIT, LOXL2, MEN1, MYH9, NANOS1, NELL1, NELL2, NOS3, NR4A1, PDGFB, PFN1, PKN3, PPAP2B, PPM1F, PRKCA, PRKX, PTEN, SCARB1, SEMA3A, SOX9, SRF, TNFSF12, VEGFC, WNT5A, ZNF580]
GO:0090136	epithelial cell-cell adhesion	5	38.4615	0.0277156	[BVES, JUP, KIT, SRF, THBS4]
GO:0090175	regulation of establishment of planar polarity	10	30.303	0.0136489	[ANKRD6, DVL1, DVL3, LRP6, MAGI2, MLLT3, RORA, SFRP1, WNT5A, ZNRF3]
GO:0090207	regulation of triglyceride metabolic process	7	30.4348	0.0359046	[FBXW7, FITM2, NR1H2, PNPLA2, SCARB1, SIK1, SREBF1]
GO:0090237	regulation of arachidonic acid secretion	4	50	0.0177442	[AMH, MIF, PLA2G6, PLA2R1]
GO:0090238	positive regulation of arachidonic acid secretion	4	57.1429	0.00998895	[AMH, MIF, PLA2G6, PLA2R1]
GO:0090342	regulation of cell aging	9	34.6154	0.007468	[AMH, CDK6, CDKN2A, HMGA1, HMGA2, MARCH5, MIF, PTEN, TWIST1]
GO:0090343	positive regulation of cell aging	3	50	0.0411606	[CDKN2A, HMGA1, HMGA2]
GO:0090344	negative regulation of cell aging	6	46.1538	0.0057601	[AMH, CDK6, MARCH5, MIF, PTEN, TWIST1]
GO:0090398	cellular senescence	11	26.1905	0.029572	[CDK6, CDKN2A, HMGA1, HMGA2, PAK3, PLA2R1, PML, PRKCD, SRF, TWIST1, ULK3]
GO:0090407	organophosphate biosynthetic process	102	17.1141	0.0249921	[ABCA1, ACOT7, ADCY1, ADCY2, ADCY6, ADK, ADM, AGPAT2, AK4, AK5, AKAP12, AKAP5, AKAP6, ALDOA, APOE, APRT, ARF1, ATIC, ATP5D, CDS2, COASY, CPS1, DCAKD, DHODH, DHX34, DOLPP1, DPM2, DPM3, EDN1, ETNK2, FABP3, FABP5, FLAD1, FLCN, G6PD, GNAI2, GNG7, GPAA1, GPCPD1, GPD1L, GRM3, GUK1, INPP5E, IP6K3, LPGAT1, MBOAT1, MBOAT7, MVD, MVK, NADK2, NANOS1, NAPRT1, NME1-NME2, NME4, NME5, NMNAT1, NOS3, NPR1, NTRK2, …
GO:0097006	regulation of plasma lipoprotein particle levels	14	25.4545	0.0194591	[ABCA1, ABCA5, AGTR1, APOC1, APOE, APOM, EHD1, FECH, LDLRAP1, LPL, LRP6, MYLIP, NR1H2, SCARB1]
GO:0097061	dendritic spine organization	11	33.3333	0.00447019	[ARF1, EPHB2, EPHB3, LLGL1, LRP8, LRRK2, NLGN3, PAK3, PICK1, PTEN, SHANK3]
GO:0097190	apoptotic signaling pathway	111	18.0195	0.00443465	[AATF, ACKR3, AMH, APAF1, ARHGAP4, ARHGEF16, ARHGEF17, ARHGEF18, ARRB2, ATP7A, BAD, BAG3, BAX, BCL2L14, BCL3, BID, BLOC1S2, BMP5, BOK, CFLAR, CIB1, CLU, CRADD, CTH, CTSC, CTSH, DAPK3, DDX5, DEAF1, DEDD, DLGAP3, EPHA2, EYA1, FASN, FASTK, FGD3, GPX1, GSTP1, HIC1, HSPB1, HYAL2, IER3, IFI27, IGBP1, ITGB3BP, JAK3, JMY, KALRN, KIAA1324, KITLG, MAPK7, MAPK8IP1, MCL1, MEIS3, MEN1, MIF, MKL1, MKNK2, MYBBP…
GO:0097192	extrinsic apoptotic signaling pathway in absence of ligand	19	21.1111	0.0477949	[BAD, BAG3, BAX, BOK, CFLAR, DAPK3, EYA1, FASN, JAK3, KIAA1324, KITLG, MAPK7, MCL1, MKNK2, PPP1CA, PPP2R1A, TERT, TRAF2, UNC5B]
GO:0097202	activation of cysteine-type endopeptidase activity	23	24.2105	0.00644282	[APAF1, ASPH, BAD, BAX, BCL2L13, BID, BOK, CARD8, CDKN2A, CRADD, DLC1, EGLN3, F2R, FASN, IFI27, NLRP1, PIDD, PML, PRELID1, RPS27L, SENP1, SNCA, TRAF2]
GO:0097205	renal filtration	7	30.4348	0.0359046	[CYBA, F2R, F2RL1, GJA5, PDGFB, PTPRO, SULF1]
GO:0097285	cell-type specific apoptotic process	80	19.5122	0.00176197	[AGRN, AMH, APAF1, APOE, ARRB2, ATN1, ATP7A, BAG3, BAX, BID, BOK, BTG1, CAPN10, CD248, CDKN2A, CHD8, CLN3, CNTFR, COL18A1, CTSL, EDN1, EGLN2, EGLN3, EPHA7, F2R, FAM58A, FASN, FOXB1, G6PD, GPI, GPX1, GRIK5, IRF7, JAK3, KITLG, LRP6, MAEA, MAP2K7, MAP3K11, MAPK7, MEN1, MIF, NELL1, NLRP1, NOC2L, NSMF, NTRK2, PDE1A, PIAS4, PIGT, POU3F4, PRDX2, PRELID1, PRKCA, PRKCD, PTEN, RAG1, RAPGEF2, RB1, RBM10, RH…
GO:0097479	synaptic vesicle localization	17	22.3684	0.0363006	[AP3D1, BLOC1S2, CACFD1, DNM2, GRIK5, LLGL1, PCLO, PIP5K1C, PTEN, RAB3A, SEPT5, SNAP25, SNCA, STX7, SYP, UNC13A, ZDHHC15]
GO:0097480	establishment of synaptic vesicle localization	16	21.9178	0.0488318	[AP3D1, BLOC1S2, CACFD1, DNM2, GRIK5, LLGL1, PCLO, PIP5K1C, RAB3A, SEPT5, SNAP25, SNCA, STX7, SYP, UNC13A, ZDHHC15]
GO:0097485	neuron projection guidance	82	20.2469	4.97777312089881E-4	[ABLIM1, ABLIM2, ACTB, ACTG1, AGRN, ANK3, AP2A1, AP2S1, ARHGAP39, ARX, CACNB2, CACNB4, CHN1, CLTA, COL5A1, COL9A1, DCC, DPYSL5, DVL1, EFNA2, EPHA7, EPHB2, EPHB3, ETV1, FZD3, FZD9, GLI2, ITGA5, ITGB3, KIAA1598, LIMK1, LLGL1, LMNB2, MAP2K2, MAPK3, MAPK8IP3, MEGF8, MYH10, MYH9, MYL9, NCAM1, NCAN, NCK2, NELL1, NELL2, NEO1, NTN1, NTN4, PIP5K1C, PLXNA1, PLXNA2, PTPRO, PVRL1, RGMB, RHOB, RHOG, RND1, RPS…
GO:0097490	sympathetic neuron projection extension	4	66.6667	0.00482332	[NELL1, NELL2, SEMA3A, SEMA3F]
GO:0097491	sympathetic neuron projection guidance	4	66.6667	0.00482332	[NELL1, NELL2, SEMA3A, SEMA3F]
GO:1900024	regulation of substrate adhesion-dependent cell spreading	7	31.8182	0.0283607	[C1QBP, CIB1, KANK1, LRRC16A, MYADM, RAC3, TRIOBP]
GO:1900026	positive regulation of substrate adhesion-dependent cell spreading	6	37.5	0.0184017	[C1QBP, CIB1, LRRC16A, MYADM, RAC3, TRIOBP]
GO:1900125	regulation of hyaluronan biosynthetic process	3	50	0.0411606	[AP2A1, NFKB1, PDGFB]
GO:1900133	regulation of renin secretion into blood stream	3	75	0.0102844	[F2R, F2RL1, GJA5]
GO:1901030	positive regulation of mitochondrial outer membrane permeabilization involved in apoptotic signaling pathway	4	50	0.0177442	[BAX, BID, SIVA1, ZNF205]
GO:1901068	guanosine-containing compound metabolic process	98	18.5255	0.00317764	[ACAP3, AGAP3, AGRN, AK4, AMOT, ARF1, ARFGAP1, ARHGAP24, ARHGAP6, ARHGEF1, ARHGEF10L, ARHGEF16, ARHGEF17, ARHGEF18, ARHGEF19, ARL2, ARL8A, ARRB2, AXIN1, BVES, CDKL5, CHN1, CHN2, CPEB2, DENND3, DENND4A, DENND4B, DENND5B, DLC1, DNM2, DNM3, EPHA2, EPHB3, FGD3, GIT1, GNAO1, GNG11, GNG5, GNL3, GUK1, KALRN, LLGL1, LRRK2, MLST8, MTG1, NDEL1, NME1-NME2, NME4, NME5, NTRK2, OCRL, PGAM5, PIN1, PRTFDC1, PTGE…
GO:1901069	guanosine-containing compound catabolic process	93	18.3794	0.00500727	[ACAP3, AGAP3, AGRN, AMOT, ARF1, ARFGAP1, ARHGAP24, ARHGAP6, ARHGEF1, ARHGEF10L, ARHGEF16, ARHGEF17, ARHGEF18, ARHGEF19, ARL2, ARL8A, ARRB2, AXIN1, BVES, CDKL5, CHN1, CHN2, CPEB2, DENND3, DENND4A, DENND4B, DENND5B, DLC1, DNM2, DNM3, EPHA2, EPHB3, FGD3, GIT1, GNAO1, GNG11, GNG5, GNL3, KALRN, LLGL1, LRRK2, MLST8, MTG1, NDEL1, NTRK2, OCRL, PGAM5, PIN1, PRTFDC1, PTGES2, RAB11B, RAB14, RAB33A, RAB3A, …
GO:1901135	carbohydrate derivative metabolic process	300	17.4115	5.1772384966429846E-5	[AATF, ABCA1, ABCA2, ABCC5, ACAP3, ACOT7, ADCY2, ADCY6, ADK, ADM, AGAP3, AGRN, AHSA1, AK4, AK5, AKAP12, AKAP5, AKAP6, AKR1C1, AKR7A2, ALDOA, ALDOC, ALG10, ALG12, ALG3, AMDHD2, AMOT, AP2A1, APOE, APRT, ARF1, ARFGAP1, ARHGAP24, ARHGAP6, ARHGEF1, ARHGEF10L, ARHGEF16, ARHGEF17, ARHGEF18, ARHGEF19, ARL2, ARL8A, ARRB2, ARSA, ARSI, ARSJ, ATIC, ATP2B4, ATP5D, ATP6V1A, ATP7A, AXIN1, B3GALT5, B3GALT6, B3GA…
GO:1901136	carbohydrate derivative catabolic process	138	16.707	0.0221356	[ABCA2, ACAP3, AGAP3, AGRN, AMDHD2, AMOT, ARF1, ARFGAP1, ARHGAP24, ARHGAP6, ARHGEF1, ARHGEF10L, ARHGEF16, ARHGEF17, ARHGEF18, ARHGEF19, ARL2, ARL8A, ARRB2, ATP5D, AXIN1, BVES, CDKL5, CHD8, CHN1, CHN2, CPEB2, CST3, DDX17, DDX39B, DDX54, DENND3, DENND4A, DENND4B, DENND5B, DLC1, DNM2, DNM3, ENPP4, EPHA2, EPHB3, FGD3, GALNS, GIT1, GNAO1, GNG11, GNG5, GNL3, GPD1L, HSPG2, HYAL2, ITPA, KALRN, KATNB1, LL…
GO:1901137	carbohydrate derivative biosynthetic process	122	16.5761	0.0368607	[AATF, ABCA1, ABCC5, ACOT7, ADCY2, ADCY6, ADK, ADM, AGRN, AK5, AKAP12, AKAP5, AKAP6, ALDOA, ALG10, ALG12, ALG3, AP2A1, APOE, APRT, ATIC, ATP5D, ATP7A, B3GALT5, B3GALT6, B3GAT3, B4GALT2, CANT1, CHPF, CHST1, CHST12, CHST14, CHST15, CHST2, CHST3, CHST7, CHST9, CHSY3, COASY, COLGALT1, CSGALNACT1, DCAKD, DERL3, DHODH, DOLPP1, DPM2, DPM3, DSEL, EDN1, FKRP, FLCN, FUT5, G6PD, GAL3ST3, GALNT16, GBGT1, GCN…
GO:1901292	nucleoside phosphate catabolic process	134	17.6548	0.00401696	[ABCA2, ACAP3, AGAP3, AGRN, AHSA1, AMOT, ARF1, ARFGAP1, ARHGAP24, ARHGAP6, ARHGEF1, ARHGEF10L, ARHGEF16, ARHGEF17, ARHGEF18, ARHGEF19, ARL2, ARL8A, ARRB2, ATP5D, AXIN1, BVES, CDKL5, CHD8, CHN1, CHN2, CPEB2, DCTPP1, DDX17, DDX39B, DDX54, DENND3, DENND4A, DENND4B, DENND5B, DLC1, DNAJB6, DNM2, DNM3, DNPH1, ENPP3, EPHA2, EPHB3, FGD3, GIT1, GNAO1, GNG11, GNG5, GNL3, GPX1, ITPA, KALRN, KATNB1, LLGL1, L…
GO:1901361	organic cyclic compound catabolic process	194	16.5247	0.0118221	[ABCA2, ACAP3, AGAP3, AGO1, AGO2, AGRN, AHSA1, AMOT, APAF1, APOE, ARF1, ARFGAP1, ARHGAP24, ARHGAP6, ARHGEF1, ARHGEF10L, ARHGEF16, ARHGEF17, ARHGEF18, ARHGEF19, ARL2, ARL8A, ARRB2, ATP5D, AXIN1, BAX, BLVRA, BVES, CCBL1, CDKL5, CDKN2A, CHD8, CHN1, CHN2, CNOT3, CNOT6, COMT, CPEB2, DCTPP1, DDX17, DDX39B, DDX54, DENND3, DENND4A, DENND4B, DENND5B, DHX34, DLC1, DNAJB6, DNASE2, DNM2, DNM3, DNPH1, DPYSL5,…
GO:1901362	organic cyclic compound biosynthetic process	628	15.1289	0.0284445	[AATF, ABCA1, ABCA2, ABHD14B, ABLIM1, ABLIM2, ACOT7, ACOX2, ACVR2A, ADCY1, ADCY2, ADCY6, ADK, ADM, ADRM1, AEBP1, AES, AGO1, AGO2, AGRN, AK4, AK5, AKAP12, AKAP17A, AKAP5, AKAP6, ALDOA, ALK, AMH, ANP32A, APOE, APRT, ARHGEF10L, ARID3A, ARID5A, ARMCX3, ARRB2, ARX, ASCC2, ASCC3, ASPH, ATF5, ATIC, ATN1, ATOH8, ATP5D, ATP7A, ATRX, AURKAIP1, AXIN1, BAHD1, BAMBI, BANP, BAZ2B, BCL2L12, BCL3, BCL9L, BEX1, B…
GO:1901379	regulation of potassium ion transmembrane transport	7	31.8182	0.0283607	[ACTN2, AKAP6, CFH, KCNH2, KCNJ2, NEDD4L, WWP2]
GO:1901564	organonitrogen compound metabolic process	361	17.0283	5.689722037954847E-5	[ABCA1, ABCA2, ABCC5, ABHD14A-ACY1, ACAP3, ACD, ACOT7, ACY1, ADC, ADCY2, ADCY6, ADK, ADM, AGAP3, AGRN, AHSA1, AIMP2, AK4, AK5, AKAP12, AKAP5, AKAP6, ALDOA, AMOT, AP2A1, APOC1, APOE, APRT, ARF1, ARFGAP1, ARHGAP24, ARHGAP6, ARHGEF1, ARHGEF10L, ARHGEF16, ARHGEF17, ARHGEF18, ARHGEF19, ARL2, ARL8A, ARRB2, ARSA, ARSI, ARSJ, ATCAY, ATIC, ATP2B4, ATP5D, ATP6V1A, ATP7A, AXIN1, B3GALT6, B3GAT3, B4GALT2, BA…
GO:1901565	organonitrogen compound catabolic process	177	17.052	0.00471228	[ABCA2, ACAP3, ACD, AGAP3, AGRN, AHSA1, AMOT, APOC1, ARF1, ARFGAP1, ARHGAP24, ARHGAP6, ARHGEF1, ARHGEF10L, ARHGEF16, ARHGEF17, ARHGEF18, ARHGEF19, ARL2, ARL8A, ARRB2, ATP5D, AXIN1, BCAT2, BCKDK, BLVRA, BVES, CBS, CCBL1, CDKL5, CHD8, CHN1, CHN2, COASY, COMT, CPEB2, CPS1, CTH, CTSH, CYP2D6, DDX17, DDX39B, DDX54, DENND3, DENND4A, DENND4B, DENND5B, DLC1, DNAJB6, DNM2, DNM3, DPYSL5, ECE1, ENPP4, EPHA2…
GO:1901566	organonitrogen compound biosynthetic process	126	17.1196	0.0138191	[ABCA1, ABCC5, ACOT7, ADC, ADCY2, ADCY6, ADK, ADM, AGRN, AK5, AKAP12, AKAP5, AKAP6, ALDOA, AP2A1, APOE, APRT, ATIC, ATP5D, ATP7A, B3GALT6, B3GAT3, B4GALT2, BCAT2, BDH2, CBS, CCBL1, CERS6, CHPF, CHST1, CHST12, CHST14, CHST15, CHST2, CHST3, CHST7, CHST9, CHSY3, COASY, CPS1, CSGALNACT1, CSNK1G2, CTH, DCAKD, DHODH, DOHH, DSEL, EDN1, FABP5, FECH, FLAD1, FLCN, FURIN, GAD1, GAMT, GCNT2, GGT7, GNAI2, GNG…
GO:1901575	organic substance catabolic process	367	15.8258	0.00989895	[ABCA2, ABHD4, ACAP3, ACD, ACOT7, ACOX2, ADAMTS7, AGAP3, AGO1, AGO2, AGRN, AHSA1, ALDOA, ALDOC, AMDHD2, AMOT, ANAPC11, APAF1, APC, APOC1, APOE, ARF1, ARFGAP1, ARHGAP24, ARHGAP6, ARHGEF1, ARHGEF10L, ARHGEF16, ARHGEF17, ARHGEF18, ARHGEF19, ARL2, ARL8A, ARRB2, ATP5D, AXIN1, BAD, BANP, BAX, BCAT2, BCKDK, BDH2, BLVRA, BSCL2, BVES, CBS, CCBL1, CDKL5, CDKN2A, CHD8, CHN1, CHN2, CLN3, CLN6, CLPP, CLU, CNO…
GO:1901576	organic substance biosynthetic process	872	15.4118	8.006128321981895E-4	[AATF, ABCA1, ABCA2, ABCC5, ABHD14B, ABLIM1, ABLIM2, ACD, ACOT7, ACOX2, ACSL1, ACSL4, ACSS1, ACVR2A, ADC, ADCY1, ADCY2, ADCY6, ADK, ADM, ADRM1, AEBP1, AES, AGO1, AGO2, AGPAT2, AGRN, AIMP2, AK4, AK5, AKAP12, AKAP17A, AKAP5, AKAP6, ALDOA, ALDOC, ALG10, ALG12, ALG3, ALK, AMH, ANP32A, AP2A1, APOC1, APOE, APRT, ARF1, ARHGEF10L, ARID3A, ARID5A, ARMCX3, ARRB2, ARX, ASCC2, ASCC3, ASPH, ATF5, ATIC, ATN1, …
GO:1901652	response to peptide	77	17.9907	0.0163686	[ADCY1, ADCY2, ADCY6, ADM, APOE, APRT, ATP6V0C, ATP6V0D1, ATP6V0E2, ATP6V1A, BCAR1, BDH1, BSG, CAB39L, CACYBP, CAPN10, CISH, COASY, CPEB2, CPS1, DOK1, EIF4EBP1, FABP3, FAM58A, FGFR4, GAL, GNAI2, GNG11, GNG2, GNG5, GNG7, HSD11B2, INSIG2, INSR, IRS1, JAK3, JUNB, JUND, KANK1, KAT2B, KLF11, LRP6, MAP2K2, MAPK3, MDM2, MLST8, MTUS1, MYO5A, NFKBIA, NLRP1, OGT, PDGFB, PIK3R2, PIK3R3, PPAT, PRKAG2, PRKAR1…
GO:1901657	glycosyl compound metabolic process	150	16.8729	0.0127399	[ABCA2, ACAP3, ACOT7, ADK, AGAP3, AGRN, AHSA1, AK4, AK5, AKR1C1, AKR7A2, ALDOA, AMOT, APRT, ARF1, ARFGAP1, ARHGAP24, ARHGAP6, ARHGEF1, ARHGEF10L, ARHGEF16, ARHGEF17, ARHGEF18, ARHGEF19, ARL2, ARL8A, ARRB2, ATIC, ATP5D, ATP6V1A, AXIN1, BAD, BVES, CBR4, CDKL5, CHD8, CHN1, CHN2, COASY, CPEB2, DCAKD, DDX17, DDX39B, DDX54, DENND3, DENND4A, DENND4B, DENND5B, DHODH, DLC1, DNAJB6, DNM2, DNM3, DNPH1, ENPP…
GO:1901658	glycosyl compound catabolic process	116	16.5714	0.0412475	[ABCA2, ACAP3, AGAP3, AGRN, AMOT, ARF1, ARFGAP1, ARHGAP24, ARHGAP6, ARHGEF1, ARHGEF10L, ARHGEF16, ARHGEF17, ARHGEF18, ARHGEF19, ARL2, ARL8A, ARRB2, ATP5D, AXIN1, BVES, CDKL5, CHD8, CHN1, CHN2, CPEB2, DDX17, DDX39B, DDX54, DENND3, DENND4A, DENND4B, DENND5B, DLC1, DNM2, DNM3, ENPP4, EPHA2, EPHB3, FGD3, GIT1, GNAO1, GNG11, GNG5, GNL3, KALRN, KATNB1, LLGL1, LRRK2, MLST8, MNAT1, MTG1, MYH10, MYH3, MYH…
GO:1901701	cellular response to oxygen-containing compound	135	17.024	0.0132717	[ABCA1, ADCY1, ADCY2, ADCY6, AGAP3, AKAP6, AKR1C1, AMH, APOE, APRT, ATP6V0C, ATP6V0D1, ATP6V0E2, ATP6V1A, ATP7A, BAD, BCAR1, CAB39L, CACTIN, CAPN10, CISH, COASY, CPEB2, CPS1, CYBA, DLC1, DOK1, EIF4EBP1, FAM58A, FANCC, FECH, FGFR4, FZD4, GNG11, GNG2, GNG5, GNG7, GPX1, GPX4, GRIK5, GSTP1, HCN1, IGFBP5, INSR, IRS1, JAK3, JUP, KANK1, KAT2B, KLF11, KMT2E, LITAF, LRP6, LRP8, MAP2K2, MAP2K7, MAPK3, MAPK…
GO:1901798	positive regulation of signal transduction by p53 class mediator	6	35.2941	0.0250884	[CDKN2A, DDX5, HIC1, MMAB, PLA2R1, ZNF385A]
GO:1901879	regulation of protein depolymerization	16	24.2424	0.0206001	[ADD2, APC, ASPH, CAPZA2, CIB1, F2RL1, GAS2L1, KATNB1, LRRC16A, MID1IP1, PDXP, PLEKHH2, SHROOM2, SPTBN2, TRIOBP, TWF2]
GO:1901880	negative regulation of protein depolymerization	13	24.5283	0.0318014	[ADD2, APC, CAPZA2, CIB1, GAS2L1, KATNB1, LRRC16A, MID1IP1, PLEKHH2, SHROOM2, SPTBN2, TRIOBP, TWF2]
GO:1901998	toxin transport	3	50	0.0411606	[LRP6, MFSD10, SLC7A8]
GO:1902176	negative regulation of intrinsic apoptotic signaling pathway in response to oxidative stress	4	40	0.0420875	[GPX1, HSPB1, MAPK7, NME5]
GO:1902284	neuron projection extension involved in neuron projection guidance	11	36.6667	0.00189473	[MEGF8, NELL1, NELL2, RYK, SEMA3A, SEMA3F, SLIT1, SLIT3, SMOX, WNT3, WNT5A]
GO:1902285	semaphorin-plexin signaling pathway involved in neuron projection guidance	4	66.6667	0.00482332	[NELL1, NELL2, SEMA3A, SEMA3F]
GO:1902305	regulation of sodium ion transmembrane transport	10	34.4828	0.00503869	[ACTN4, ANK3, ATP2B4, FGF12, GPD1L, NANOS1, NEDD4L, SCN3B, SLC9A3R1, UTRN]
GO:1902510	regulation of apoptotic DNA fragmentation	3	60	0.022992	[BAX, CDKN2A, PRELID1]
GO:1902531	regulation of intracellular signal transduction	265	18.9828	1.6588278559101593E-7	[A2M, ABCA1, ACAP3, ACKR3, AGAP3, AGRN, AKAP12, AKAP5, AKAP6, ALK, AMH, AMOT, ANKRD6, APC, APOE, ARFGAP1, ARHGAP19, ARHGAP23, ARHGAP24, ARHGAP33, ARHGAP39, ARHGAP4, ARHGAP44, ARHGAP6, ARHGDIA, ARHGEF1, ARHGEF10L, ARHGEF16, ARHGEF17, ARHGEF18, ARHGEF19, ARRB2, ASPH, AURKAIP1, AXIN1, BAD, BAX, BCL3, BID, BVES, C1QBP, C1QTNF3, CANT1, CAPN3, CARD10, CARD8, CBS, CC2D1A, CDKL5, CDKN2A, CFLAR, CHN1, CHN…
GO:1902532	negative regulation of intracellular signal transduction	78	24.0741	1.3054000590455546E-6	[ACKR3, AMH, APC, APOE, ARHGAP24, C1QBP, CARD8, CIB1, CLU, CNKSR3, DAB1, DGKZ, DLC1, DUSP16, DUSP26, DUSP5, DUSP6, DUSP7, DUSP8, EPHA2, F2RL1, FLCN, GPD1L, GPS1, GPX1, GSTP1, HGS, HMGA2, HSPB1, HYAL2, IGBP1, KANK1, MAGI2, MAPK7, MAPK8IP1, MCL1, MDM2, MEN1, MGRN1, MIF, MYADM, NF2, NFKBIA, NLRX1, NME5, NOC2L, NUP62, PDCD4, PIN1, PPP2R1A, PRKCA, PRKCD, PTEN, RGS14, RORA, RPS6KA6, SAC3D1, SFRP1, SLC9…
GO:1902533	positive regulation of intracellular signal transduction	116	16.4539	0.0489438	[ACKR3, AKAP12, AKAP5, AKAP6, ALK, AMH, ANKRD6, ARRB2, AXIN1, BAD, BAX, BID, C1QBP, CANT1, CC2D1A, CDKN2A, CFLAR, CIB1, CLU, CSF1, CTH, DCC, DDX5, DDX60, DVL3, EDN1, F2R, F2RL1, FBXW7, FGFR4, FLCN, FLNA, FZD4, GCNT2, GLIPR2, GNAI2, GPR56, GPX1, HIC1, IGFBP5, INSR, KIT, KITLG, LITAF, LPAR1, LRRK2, MALT1, MAP2K2, MAP2K7, MAP3K11, MAP3K14, MAP3K6, MAP3K9, MAP4K1, MAPK3, MAPK8IP3, MDFI, MEIS3, MIF, M…
GO:1902589	single-organism organelle organization	293	16.2778	0.00502926	[ABLIM2, ACD, ACTG1, ACTN1, ACTN4, ADD2, ALDOA, ALKBH7, AMOT, ANAPC11, ANAPC15, ANK3, APC, ARF1, ARFGAP1, ARHGAP6, ARHGEF10L, ARHGEF17, ARHGEF18, ARHGEF19, ARID5A, ARL2, ARL8A, ARPC1B, ARPC5, ATCAY, AURKAIP1, AXIN1, BAD, BAIAP2L2, BAX, BCAR1, BID, BIN3, BLOC1S2, BRSK1, C14orf169, C1QBP, CAPN10, CAPN3, CAPZA2, CARM1, CASC5, CCNG2, CDC25B, CDK3, CDK9, CEP68, CFLAR, CHCHD6, CIB1, CLN3, CLUH, CNN1, C…
GO:1902667	regulation of axon guidance	10	50	1.568255273878549E-4	[MEGF8, NELL1, PTPRO, RYK, SEMA3A, SEMA3F, SLIT1, SLIT3, WNT3, WNT5A]
GO:1990090	cellular response to nerve growth factor stimulus	6	46.1538	0.0057601	[CIB1, EHD1, MAGI2, RAPGEF1, RAPGEF2, SORT1]
GO:1990138	neuron projection extension	25	30.8642	9.607693188494796E-5	[APOE, ARHGAP4, CDKL5, DVL1, LIMK1, LMNB2, MAP1B, MEGF8, NDEL1, NELL1, NELL2, NLGN3, NTN1, RYK, SEMA3A, SEMA3F, SEMA7A, SLIT1, SLIT3, SMOX, TNFRSF12A, TWF2, ULK1, WNT3, WNT5A]
GO:2000008	regulation of protein localization to cell surface	8	44.4444	0.00191325	[ACTN2, ASTN2, GPD1L, GPM6B, NEDD4L, RAB11B, RAB11FIP5, TAX1BP3]
GO:2000009	negative regulation of protein localization to cell surface	5	71.4286	9.490950670137004E-4	[ACTN2, ASTN2, GPM6B, NEDD4L, TAX1BP3]
GO:2000026	regulation of multicellular organismal development	220	16.369	0.0114313	[ACVR2A, ADAMTS7, ADM, AGRN, AKAP6, AMOT, ANKRD6, AP3D1, APC, APOE, ARHGAP4, ARHGDIA, ARHGEF1, ATF5, BAD, BAI1, BAMBI, BAX, BCL9L, BMP5, BTG1, C1QBP, CAPN3, CARM1, CD276, CDK6, CDKL5, CDKN2A, CHN1, CIB1, CNR1, CSF1, CST3, CTSH, CXXC1, DAB1, DBN1, DCC, DDX17, DDX5, DEAF1, DICER1, DISC1, DUSP6, DVL1, DVL3, E4F1, EDN1, EPHA2, EPHB2, EPHB3, ESRRA, EXOSC3, EYA1, FAM213A, FAM58A, FASN, FBN2, FBXW7, FGF…
GO:2000050	regulation of non-canonical Wnt signaling pathway	6	42.8571	0.00887983	[ANKRD6, IFT80, LRP6, MLLT3, SFRP1, ZNRF3]
GO:2000051	negative regulation of non-canonical Wnt signaling pathway	4	66.6667	0.00482332	[IFT80, LRP6, SFRP1, ZNRF3]
GO:2000058	regulation of protein ubiquitination involved in ubiquitin-dependent protein catabolic process	6	35.2941	0.0250884	[AXIN1, CLU, DISC1, FBXW7, PML, PTEN]
GO:2000060	positive regulation of protein ubiquitination involved in ubiquitin-dependent protein catabolic process	5	45.4545	0.0127092	[AXIN1, CLU, DISC1, FBXW7, PTEN]
GO:2000105	positive regulation of DNA-dependent DNA replication	4	50	0.0177442	[BMP5, E2F7, E2F8, WIZ]
GO:2000116	regulation of cysteine-type endopeptidase activity	42	20.2899	0.0102022	[APAF1, ASPH, BAD, BAX, BCL2L12, BCL2L13, BID, BOK, CARD8, CDKN2A, CRADD, DLC1, DNAJB6, EGLN3, EPHA7, F2R, FASN, GPI, GPX1, IFI27, IGBP1, INTS1, MDM2, MEN1, MICAL1, MKL1, NLRP1, NR4A1, PIDD, PML, PPM1F, PRELID1, RAG1, RPS27L, SENP1, SERPINB9, SNCA, SOX2, TPD52L1, TRAF2, UACA, WNT9A]
GO:2000145	regulation of cell motility	98	18.3178	0.00446765	[ABHD6, AMOT, APC, APOE, ARHGAP4, BCAR1, BMP5, C1QBP, CDK6, CIB1, CNN2, COL18A1, CORO1A, CSF1, CTSH, DAPK3, DLC1, EDN1, EGFL7, EPHA2, F2R, F2RL1, FLCN, GCNT2, GLIPR2, GNA13, GPR56, HAS2, HDAC7, HSPB1, HYAL2, IFITM1, IGFBP5, INSR, IRS1, ITGA5, ITGB3, KANK1, KIT, LAMA4, LAMA5, LPAR1, LRRC16A, MAGI2, MAP2K2, MPP1, MYADM, MYO1C, NBL1, NELL1, NELL2, NEXN, NF2, NOX4, NSMF, NTN1, PDGFB, PDPN, PFN1, PHLD…
GO:2000210	positive regulation of anoikis	3	60	0.022992	[AES, BRMS1, SIK1]
GO:2000278	regulation of DNA biosynthetic process	7	30.4348	0.0359046	[ARRB2, DNAJC2, FGFR4, NOX4, PAK3, PDGFB, TOM1L1]
GO:2000379	positive regulation of reactive oxygen species metabolic process	11	30.5556	0.0092599	[AGTR1, F2RL1, GSTP1, NOX4, PAK3, PDGFB, PRKCD, ROMO1, TSPO, ZC3H12A, ZNF205]
GO:2000479	regulation of cAMP-dependent protein kinase activity	4	44.4444	0.0283893	[PKIA, PRKAR1A, PRKAR1B, RAPGEF2]
GO:2000482	regulation of interleukin-8 secretion	5	50	0.0078419	[F2R, F2RL1, HYAL2, SSC5D, WNT5A]
GO:2000484	positive regulation of interleukin-8 secretion	4	50	0.0177442	[F2R, F2RL1, HYAL2, WNT5A]
GO:2000644	regulation of receptor catabolic process	3	60	0.022992	[APOE, FURIN, MYLIP]
GO:2000649	regulation of sodium ion transmembrane transporter activity	8	36.3636	0.00826264	[ACTN4, ANK3, FGF12, GPD1L, NEDD4L, SCN3B, SLC9A3R1, UTRN]
GO:2000741	positive regulation of mesenchymal stem cell differentiation	3	60	0.022992	[LTBP3, SOX6, SOX9]
GO:2000774	positive regulation of cellular senescence	3	75	0.0102844	[CDKN2A, HMGA1, HMGA2]
GO:2000778	positive regulation of interleukin-6 secretion	4	66.6667	0.00482332	[F2R, F2RL1, HYAL2, TWIST1]
GO:2001020	regulation of response to DNA damage stimulus	29	22.6562	0.00664448	[ACKR3, AMH, CDK9, CDKN2A, CLU, DDX39B, DDX5, EYA1, H2AFX, HIC1, HMGA2, IER3, MCL1, MDM2, MIF, MMAB, NUDT16, PIAS4, PLA2R1, PML, PPP4C, PRKCD, RNASEH2B, RTEL1, SIRT6, TMEM161A, TPT1, TWIST1, ZNF385A]
GO:2001056	positive regulation of cysteine-type endopeptidase activity	26	21.1382	0.0232433	[APAF1, ASPH, BAD, BAX, BCL2L13, BID, BOK, CARD8, CDKN2A, CRADD, DLC1, EGLN3, F2R, FASN, IFI27, MEN1, NLRP1, PIDD, PML, PPM1F, PRELID1, RPS27L, SENP1, SNCA, TRAF2, UACA]
GO:2001135	regulation of endocytic recycling	3	75	0.0102844	[EHD1, EHD2, RAB11B]
GO:2001141	regulation of RNA biosynthetic process	489	15.3148	0.0267886	[AATF, ABCA2, ABHD14B, ABLIM1, ABLIM2, ACVR2A, AES, AGO1, AGO2, AGRN, AKAP17A, ALK, AMH, ANP32A, ARHGEF10L, ARID3A, ARID5A, ARMCX3, ARRB2, ASCC2, ASCC3, ASPH, ATF5, ATN1, ATOH8, ATRX, AURKAIP1, AXIN1, BAHD1, BAMBI, BANP, BAZ2B, BCL2L12, BCL3, BCL9L, BEX1, BEX2, BLOC1S2, BMP5, BRF1, BRMS1, BTG1, C14orf169, C1QBP, C6orf1, CACTIN, CAPN15, CAPN3, CARF, CARM1, CASZ1, CBX4, CBX5, CBX6, CCDC106, CDK9, C…
GO:2001233	regulation of apoptotic signaling pathway	68	18.6813	0.01034	[ACKR3, AMH, APAF1, ARRB2, BAD, BAX, BCL2L14, BID, BMP5, CFLAR, CLU, CRADD, CTH, CTSC, CTSH, DAPK3, EYA1, FASN, GPX1, GSTP1, HSPB1, HYAL2, IER3, IGBP1, JAK3, KIAA1324, MAPK7, MAPK8IP1, MCL1, MEIS3, MEN1, MIF, MKL1, NELL1, NME5, NOC2L, NOS3, P4HB, PIAS4, PIDD, PLA2G6, PML, PPP1CA, PPP2R1A, PRELID1, PRKCD, PTEN, RBCK1, RELA, SEPT4, SFRP1, SIVA1, SLC9A3R1, TERT, TIMP1, TMEM102, TMEM161A, TNFAIP3, TN…
GO:2001235	positive regulation of apoptotic signaling pathway	30	22.9008	0.0049666	[APAF1, BAD, BAX, BCL2L14, BID, CLU, CRADD, CTSC, CTSH, DAPK3, FASN, HYAL2, JAK3, MKL1, PIAS4, PIDD, PML, PPP1CA, PPP2R1A, PRKCD, PTEN, RBCK1, SEPT4, SFRP1, SLC9A3R1, TNFRSF12A, TNFSF12, TP53INP1, TPD52L1, TRAF2]
GO:2001238	positive regulation of extrinsic apoptotic signaling pathway	17	26.1538	0.00807385	[BAX, BCL2L14, BID, DAPK3, FASN, HYAL2, JAK3, MKL1, PIDD, PML, PPP1CA, PPP2R1A, RBCK1, SFRP1, TNFRSF12A, TNFSF12, TRAF2]
GO:2001239	regulation of extrinsic apoptotic signaling pathway in absence of ligand	14	22.9508	0.0446604	[BAX, CFLAR, DAPK3, EYA1, FASN, JAK3, KIAA1324, MAPK7, MCL1, PPP1CA, PPP2R1A, TERT, TRAF2, UNC5B]
GO:2001241	positive regulation of extrinsic apoptotic signaling pathway in absence of ligand	6	37.5	0.0184017	[BAX, DAPK3, FASN, JAK3, PPP1CA, PPP2R1A]

## Sheet: SK-N-SH_KD
GOID	GOTerm	Nr. Genes	% Associated Genes	Term PValue	Associated Genes Found
GO:0000165	MAPK cascade	77	12.623	0.00222654	[ADAM9, ALK, ANKRD26, ARL6IP5, ATF2, CAMKK2, CAV1, CBS, CD24, CDC42, CDC42EP5, CHRNA7, CNKSR3, CTGF, DAG1, DIRAS1, DOK4, DRD2, DUSP7, EDA2R, EGFR, EPHA2, ETFB, F2R, F2RL1, FGF2, FGFR1, FGFR4, FKTN, FZD7, GAB1, GAREM, GARS, GREM1, HGF, HIPK2, HIPK3, IFNAR1, IGF2, IGFBP3, IL11, IQGAP3, ITGAV, JUN, KITLG, MAP3K2, MAPK8, MEF2A, MEN1, MYC, NF1, NF2, NOX4, NRG1, OXTR, PTK2B, PTPLAD1, RASGRP3, RGS2, RGS…
GO:0000902	cell morphogenesis	153	13.6607	1.7679138515823844E-7	[ABLIM3, ACTB, ACTG1, ACTR3, ADCY1, ANK3, ANTXR1, AP2A2, AP2S1, ARC, ARHGAP35, ARL13B, ASAP1, ATP2B4, AXL, B3GNT1, BBS1, BCL6, BDNF, BMPR1B, BTBD3, CACNA1G, CD24, CDC42, CDC42EP1, CDC42EP5, CDH11, CEP41, CNTN1, CNTN4, COL18A1, COL4A2, COL5A1, COL5A2, COL6A1, CUL7, DAG1, DKK1, DPYSL3, DRD2, DZIP1, EFNA5, EGFR, EPHA2, EPHB2, ETV1, FGD6, FGFR1, FLOT1, FLRT3, FMNL2, FRMD6, FYCO1, FZD7, GARS, GAS1, GD…
GO:0000904	cell morphogenesis involved in differentiation	125	15.3563	3.416978753560172E-9	[ABLIM3, ACTB, ACTG1, ACTR3, ADCY1, ANK3, ANTXR1, AP2A2, AP2S1, ARHGAP35, ARL13B, ATP2B4, AXL, B3GNT1, BDNF, BMPR1B, BTBD3, CACNA1G, CD24, CDC42, CDH11, CNTN1, CNTN4, COL18A1, COL4A2, COL5A1, COL5A2, COL6A1, CUL7, DAG1, DKK1, DPYSL3, DRD2, EFNA5, EGFR, EPHA2, EPHB2, ETV1, FGFR1, FLOT1, FLRT3, FRMD6, FYCO1, FZD7, GARS, GAS1, GDI1, GFRA1, GREM1, GRIN1, HAS2, HEG1, HEY1, HGF, HIF1A, HMGA2, ITGA10, I…
[truncated: 1,067 more rows]

## Sheet: NPC_CHD8+-
GOID	GOTerm	Nr. Genes	% Associated Genes	Term PValue	Associated Genes Found
[truncated: 1,137 more rows]

## Sheet: Common_GO_by_3_lists_or_more
GO TERM	GO ID	Group Term by CLUEGO	# of lists with this term
aging	GO:0007568	aging	3
cell adhesion	GO:0007155	cell adhesion	3
cell-substrate adherens junction assembly	GO:0007045	cell adhesion	3
[truncated: 319 more rows]
