# Supplementary material for: La protección del cliente bancario ¿realidad o utopía?
Source: Springer Nature journal article supplement (doi:10.1186/s13229-015-0048-6), 2004-01-01
Supplement: MOESM10 [file 9785426]

Table S9: Number of variants of ips2 in ASD-risk genes.

| type                | No. of variants |
|---------------------|-----------------|
| frameshift INDEL    | 4               |
| nonframeshift INDEL | 3               |
| nonsynonymous SNV   | 287             |
| stopgain SNV        | 1               |
| stoploss SNV        | 0               |
| synonymous SNV      | 480             |

Table S10: Deleterious variants of ips2 in ASD-risk genes and their functional annotations by the ANNOVAR.

| Chr | Position  | Ref | Alt       | Geno-<br>type | Gene   | Function                | AACchange                                                                        | Alt allele<br>frequency<br>(ESP6500) | Alt allele<br>frequency<br>(1KG) |
|-----|-----------|-----|-----------|---------------|--------|-------------------------|----------------------------------------------------------------------------------|--------------------------------------|----------------------------------|
| 8   | 100133706 | T   | G         | 1/1           | VPS13B | stopgain                | NM_181661:exon8:c.T1239G:p.Y413X                                                 | 0.76                                 | 0.71                             |
| 7   | 151945071 | G   | GT        | 0/1           | KMT2C  | frameshift<br>insertion | NM_170606:exon14:c.2448_2448delinsAC                                             | NA                                   | NA                               |
| 11  | 76954788  | T   | TA        | 0/1           | GDPD4  | frameshift<br>insertion | NM_182833:exon12:c.1192_1192delinsTA                                             | 0.27                                 | 0.25                             |
| 18  | 42456670  | C   | CTC<br>TT | 1/1           | SETBP1 | frameshift<br>insertion | NM_001130110:exon4:c.681_681delinsCTCTT                                          | 0.53                                 | 0.49                             |
| 22  | 19189003  | A   | AC        | 1/1           | CLTCL1 | frameshift<br>insertion | NM_001835:exon23:c.3602_3602delinsGT,CLTCL1:NM_007098:exon23:c.3602_3602delinsGT | 0.99                                 | 0.99                             |
